# Supplementary material
Source: PubMed Central journal article supplement (PMC7039282)
Supplement: NIHMS1554352-supplement-SI_complete__pdf.pdf [file NIHMS1554352-supplement-SI_complete__pdf.pdf]

# Supporting Information

## High-Spin Diradical Dication of Chiral $\pi$ -Conjugated Double Helical Molecule.

Chan Shu<sup>†</sup>, Hui Zhang<sup>†</sup>, Arnon Olankitwanit<sup>†</sup>, Suchada Rajca<sup>†</sup>, Andrzej Rajca<sup>\*†</sup>

<sup>†</sup>Department of Chemistry, University of Nebraska, Lincoln, Nebraska 68588-0304.

E-mail address: [arajca1@unl.edu](mailto:arajca1@unl.edu)

## Table of Contents

1. **Experimental Section: Synthesis, Measurements, and Computations (pp. S3–S62).**
  - 1.a *General procedures and materials* -----pp. S3
  - 1.b *Synthesis of racemic conjoined [5]helicene 1-D<sub>2</sub> (Table S1)* -----pp. S3–S4
  - 1.c *Electrochemistry (Figs. S1–S3)* -----pp. S4–S5
  - 1.d *EPR, UV-vis-NIR, and ECD spectroscopy (Table S2–S4, Figs. S4–S36)* -----pp. S6–S51
    - 1.d1 General description and EPR microwave saturation plots.
    - 1.d2 Generation of radical cation  $1^{+\cdot}\text{BF}_4^-$  via oxidation of 1-D<sub>2</sub> with AgBF<sub>4</sub> in DCM:  
EPR and UV-vis-NIR spectra.
    - 1.d3 EPR and UV-vis-NIR spectral monitoring: generation of radical cation  $1^{+\cdot}\text{BF}_4^-$   
using [Th]<sup>+</sup>[BF<sub>4</sub>]<sup>-</sup> in DCM.
    - 1.d4 Preparation of racemic diradical dication  $1^{2\cdot2+} 2\text{SbF}_6^-$  via oxidation of racemic 1-D<sub>2</sub>  
using [NO]<sup>+</sup>[SbF<sub>6</sub>]<sup>-</sup> in DBP.
    - 1.d5 Resolution of 1-D<sub>2</sub>: chiral HPLC and ECD spectroscopy.
    - 1.d6 Preparation of chiral diradical dication  $1^{2\cdot2+} 2\text{SbF}_6^-$  via oxidation of  
enantiomerically-enriched 1-D<sub>2</sub> using [NO]<sup>+</sup>[SbF<sub>6</sub>]<sup>-</sup> in DBP: ECD spectroscopy.
  - 1.e *DFT calculations (Tables S5–S16)* -----pp. S52–S63
2. **<sup>1</sup>H NMR Spectra of crude mixtures and purified 1-D<sub>2</sub> (Figs. S37–S45) (pp. S64–S68).**
3. **Outputs of DFT Calculations for Conjoined [5]Helicenes: Neutrals, Radical Cations, and Diradical Dications (pp. S69–S103).**
4. **Supporting References (pp. S104–S106).**

## 1. Experimental Section: Synthesis, Measurements, and Computations.

### 1.a General procedures and materials.

Throughout the following paragraphs labels “AO675” and alike correspond to sample or experiment codes directly traceable to the laboratory notebooks or raw data.

Dichloromethane (DCM) was obtained from solvent purification system (LC Technology Solutions). DCM for electrochemistry and for generation of radical cation, was in addition dried over calcium hydride (CaH<sub>2</sub>), and then distilled to a Schlenk vessel, and subsequently degassed by repeated freeze-and-thaw procedure. Acetonitrile (MeCN) for generation of diradical dication was dried over CaH<sub>2</sub>, then distilled to a Schlenk vessel, and subsequently degassed. Dibutyl phthalate (DBP) was obtained from commercial sources; prior to use, it was dried over calcium hydride (CaH<sub>2</sub>), and then distilled under vacuum (~10 mTorr). Per-deuterated solvents for NMR spectroscopy were obtained from Cambridge Isotope Laboratories. All other commercially available chemicals were obtained from either Aldrich or Acros, unless indicated otherwise.

Column chromatography (0–20 psig pressure) was carried out on silica gel. Standard techniques for synthesis under inert atmosphere, using Schlenk glassware and argon-filled gloveboxes, were employed. A sample of conjoined [5]helicene **1-C<sub>2h</sub>** (*meso* compound) was used from previous study.<sup>S1</sup> NMR spectra were obtained using commercial spectrometers (<sup>1</sup>H, 700 MHz, 500 MHz, and 400 MHz) using chloroform-*d* (CDCl<sub>3</sub>), benzene-*d*<sub>6</sub>, or acetone-*d*<sub>6</sub> as solvent. The 500 and 700 MHz instruments were equipped with a cryoprobe. The chemical shift references were the peaks of the solvent with residual proton content (see: Figs. S37 – S45). Typical 1D FID was subjected to exponential multiplication with an exponent of 0.1 Hz (for <sup>1</sup>H) and 1.0 – 2.0 Hz (for <sup>13</sup>C). IR spectra were obtained using a commercial instrument, equipped with an ATR sampling accessory. MS analyses were carried out at local facilities for mass spectrometry.

### 1.b. Synthesis of conjoined [5]helicene **1-D<sub>2</sub>**.

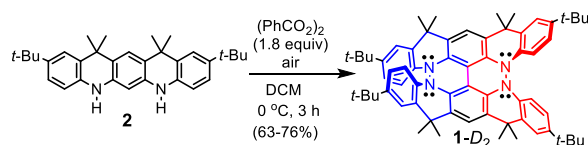

**Table S1.** Summary of preparation of **1-D<sub>2</sub>**.

| Run       | S.M.<br>(mg/mmol/equiv) | BPO<br>(mg/mmol/equiv) | DCM<br>(mL) | TM<br>(mg, % yield) | Comment                                                                                       |
|-----------|-------------------------|------------------------|-------------|---------------------|-----------------------------------------------------------------------------------------------|
| CS-3-2-5  | 19.4/0.0429/1           | 18.7/0.0772/1.8        | 3           | 12.0, 63            | Yellow solid; Fig. S37                                                                        |
| CS-3-2-7  | 19.4/0.0429/1           | 18.7/0.0772/1.8        | 3           | 14.7, 76            | Yellow solid; Figs. S38-S40                                                                   |
| CS-3-2-15 | 19.4/0.0429/1           | 18.7/0.0772/1.8        | 3           | 12.3, 63            | Yellow solid from 19.4 mg of brown crude mixture by treatment twice with MeOH; Figs. S41-S43. |
| CS-3-2-25 | 19.4/0.0429/1           | 18.7/0.0772/1.8        | 3           | 12.2, 63            | Yellow solid by treatment with MeOH followed by short column; Fig. S44                        |
| CS-3-2-27 | 83.5/0.184/1            | 80.2/0.331/1.8         | 10          | 53.8, 64            | Yellow solid by treatment with MeOH followed by short column; Fig. S45                        |

General procedure (on the scale of the first four runs in Table S1):

To diamine (SM, 19.4 mg) in a vial, dichloromethane (DCM, 2 mL) was added, forming a pink suspension. A solution of benzoyl peroxide (BPO, 18.7 mg) in DCM (1 mL) was added to the suspension of SM. The resultant mixture was stirred at room temperature for 3 h. Subsequently, the reaction mixture (red brown solution) was extracted with phosphate buffer (pH  $\approx$  11,  $2 \times 5$  mL) and DCM ( $2 \times 5$  mL). The resultant organic layer was dried over Na<sub>2</sub>SO<sub>4</sub>, and then concentrated in vacuo to give crude mixture; for representative <sup>1</sup>H NMR spectra of crude mixtures, see: Figs. S38, S39, S41, S42. The brown crude mixture was either purified by column chromatography (silica gel, 15% benzene in pentane) or treated with MeOH (and then, filtered through a short silica gel column), to obtain TM as a yellow solid (Figs. S37, S40, S43-S45).

### *1.c. Electrochemistry*

**Cyclic and square wave voltammetry of 1-D<sub>2</sub> in DCM at room temperature.** Label: AO675.

Voltammetry data for conjoined [5]helicene 1-D<sub>2</sub> were obtained in a glovebag under argon gas atmosphere, using procedures described for other  $\pi$ -conjugated compounds.<sup>S2-S4</sup> (The supply gas was a commercial ultra-high purity argon, certified to contain <1 ppm of O<sub>2</sub> and <1 ppm of H<sub>2</sub>O.) The custom-made electrochemical cell, all solid reagents, syringes, needles, etc. were extensively evacuated in Schlenk vessels (typical pressure  $\leq$  1 mTorr, temperature 20–70 °C), prior to the transfer to the glovebag. Dichloromethane (CH<sub>2</sub>Cl<sub>2</sub>) was obtained from commercial solvent purification system, then distilled from calcium hydride under nitrogen, and stored in the absence of light in a Schlenk vessel on a vacuum line; just prior to the use, the solvent was vacuum transferred as needed. Commercial potentiostat/galvanostat was used. Three electrodes were employed: quasi-reference (Ag-wire), counter (Pt-foil), and working (100- $\mu$ m Pt-disk). The concentration of an electroactive solute was about 0.7 mM. Concentration of the tetrabutylammonium hexafluorophosphate supporting electrolyte ([*n*-Bu<sub>4</sub>N]<sup>+</sup>[PF<sub>6</sub>]<sup>-</sup>) was about 0.1 M. The solution volume was about 2.4 mL. After a series of cyclic voltammograms with potential increments of 2 – 4 mV, a small amount (ca. 8 drops) of solution of decamethylferrocene (ca. 0.7 mg of Cp\*<sub>2</sub>Fe, loaded to a Schlenk vessel in a glovebox under an argon atmosphere in the supporting electrolyte, ca. 0.8 mL) was added to the cell, to provide reference potentials (–0.130 V vs. SCE for Cp\*<sub>2</sub>Fe/Cp\*<sub>2</sub>Fe<sup>+</sup> in

CH<sub>2</sub>Cl<sub>2</sub>).<sup>S5,S6</sup> Cyclic voltammograms with the scanning rates in the 20–500 mV/s range and several square wave voltammograms (frequency 4 and 10 Hz, pulse height 25 mV) were obtained. In another, initial experiment (label: AO658), ferrocene was used as potential reference (+0.46 V vs. SCE for Cp<sub>2</sub>Fe/Cp<sub>2</sub>Fe<sup>+</sup> in CH<sub>2</sub>Cl<sub>2</sub>);<sup>S6</sup> the first oxidation wave for **1-D**<sub>2</sub> was partially overlapped with the reference wave.

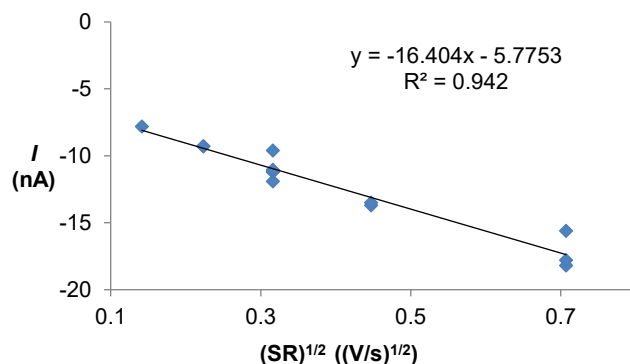

**Fig. S1.** Cyclic voltammetry of conjoined [5]helicene **1-D**<sub>2</sub> in DCM: plot of current (nA) vs. square root of scan rate ((V/s)<sup>1.2</sup>) (CV labels: AO675C1–C13).

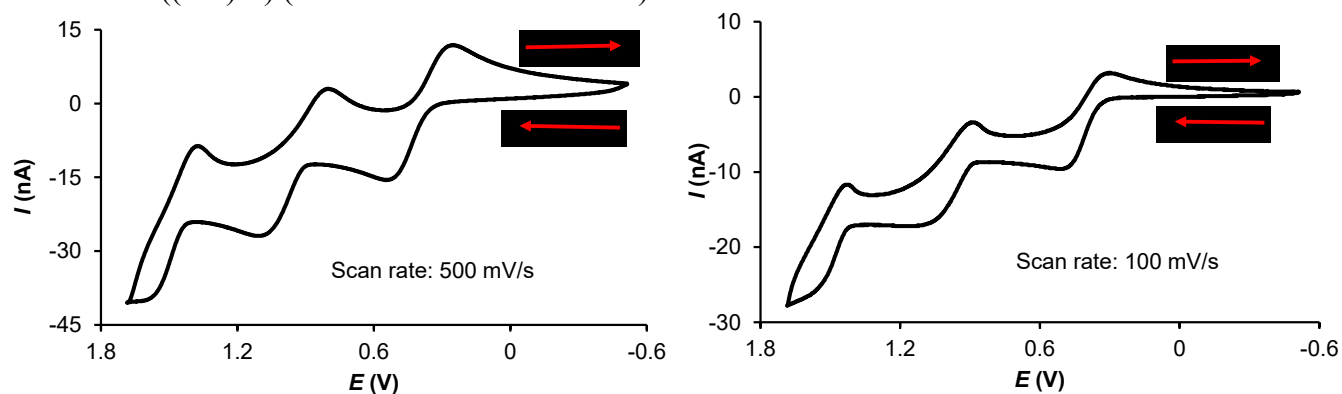

**Fig. S2.** Cyclic voltammetry of conjoined [5]helicene **1-D**<sub>2</sub> in DCM, showing the third wave corresponding to  $E_3^0 \approx 1.53$  V (CV labels: AO675C12 and AO675C13).

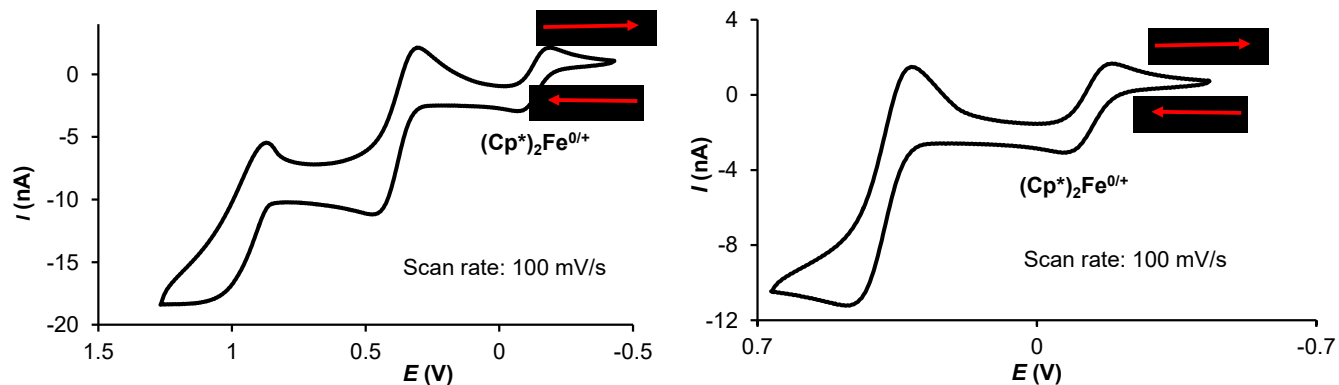

**Fig. S3.** Selected cyclic voltammograms of conjoined [5]helicene **1-D**<sub>2</sub> in DCM with reference Cp<sup>\*</sup><sub>2</sub>Fe (CV labels: AO675F14 and AO675F15).

## 1.d EPR, UV-vis-NIR, and ECD spectroscopy.

**1.d1 General description and EPR microwave saturation plots.** EPR spectra were obtained using Bruker CW EPR spectrometer (X-band EMXplus). For temperature control (400–95 K), EPR spectrometer was equipped with custom-made nitrogen flow system. Temperatures were calibrated using an additional thermocouple inserted to the EPR tube containing solvent (DBP). DPPH powder ( $g = 2.0037$ ) was used as a  $g$ -value reference. Quantitative EPR spectroscopy for diradical dication in DBP was carried using tempone in DBP as a reference.<sup>S7,S8</sup> Average values of  $\chi T$  vs  $T$  were fit to the Bleaney–Bowers equation, using either one-parameter ( $J/k =$  exchange coupling constant) fit or a two-parameter fit with  $J/k$  and  $N$ , where  $N$  is weight correction factor.<sup>S8</sup>

EPR spectra were simulated using either Bruker Symphonia or EasySpin.<sup>S9</sup> Simulations for triplet state of diradical dication (using pepper of EasySpin) are presented in Figs. S14, S21, S24, and S26. Simulations for radical cation (using garlic of EasySpin) are presented in Figs. S5 and S8.

UV-vis-NIR spectra of neutral **1-D<sub>2</sub>**, and its radical cation and diradical dication, were obtained using JASCO (model V-670) and Shimadzu (model UV-2401PC) spectrophotometers. Electronic circular dichroism (ECD) spectra were obtained using JASCO (model J-810) spectropolarimeters (one up to 700 nm and the other up to 900 nm).

Since at low temperatures required for quantitative EPR spectra obtained in the determination of singlet-triplet gap for diradical dication in DBP, slow electron spin relaxation rates may affect signal intensities, we have checked for microwave saturation at 117 K for both diradical dication and Tempone reference. In Fig. S4 below, absence of microwave saturation at 117 K is found down to attenuations of 25 dB and 28 dB (from 200 mW) for diradical dication and Tempone, respectively; therefore, the quantitative EPR can be carried out at attenuation of more than 30 dB – we have mostly used attenuation of 40 dB. Similarly, for different samples of diradical dication in DBP, absence of saturation at 129 K in the 30 – 55 dB range was found (Fig. S21).

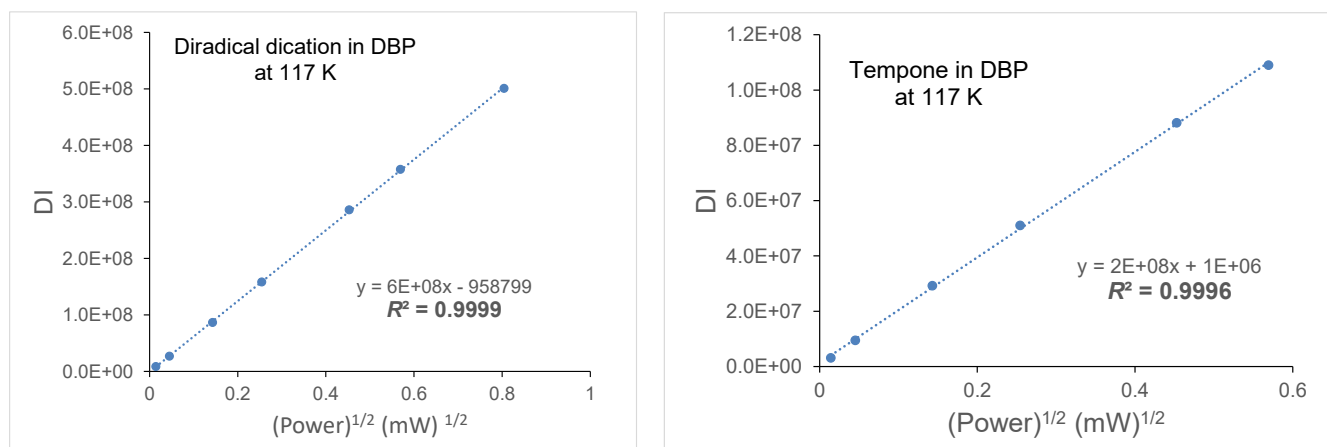

**Fig. S4.** Plots of EPR double integrated signal intensity (DI) versus the square root of microwave power in DBP at 117 K. Microwave power attenuation ranges were: for 0.56 mM diradical dication (sample label: HZ1015), 25 – 60 dB (EPR labels: HZ1015r21-r42) and for 5.08 mM Tempone, 28 – 60 dB (EPR labels: HZ1015r43-r64).

**1.d2 Generation of radical cation  $1^{+}BF_4^{-}$  via oxidation of 1-*D*<sub>2</sub> with  $AgBF_4$  in DCM: EPR and UV-vis-NIR spectra.** To the starting material 1-*D*<sub>2</sub> (4.2 mg, 4.67  $\mu$ mol, CS-2-2-6pL) in custom-made Schlenk vessel,<sup>S2</sup> evacuated on vacuum line at room temperature overnight,  $AgBF_4$  in dichloromethane (0.41 mL, 0.0149 M) was added to the vessel; color of the reaction mixture immediately changed to dark purple. After stirring at room temperature for 2 h, the reaction mixture was filtered with dichloromethane and dried under the high vacuum overnight. Dark purple crude (5.5 mg) was obtained. Subsequently, the crude mixture was dissolved in DCM (0.584 mM) and transferred to a 4-mm EPR tube. EPR spectra were obtained at 294 K (Figure S5, top panel). Using tempone in DCM (1.091 mM) as reference, spin concentration was determined as 82% at 294 K (EPR labels: CS294r1-r10). The sample solution was diluted to 0.295 mM and transferred to a UV cuvette (1-cm). Dichloromethane was prepared in another UV cuvette (1-cm). UV-vis-NIR spectra were obtained (Fig. S5, middle panel). Following UV-vis-NIR experiments, solution in UV cuvette was transferred back to a new 4 mm EPR tube. Using the same reference, the spin concentration was determined as 80% at 294 K (Fig. S5, bottom panel, EPR labels: CS296r1-r10).

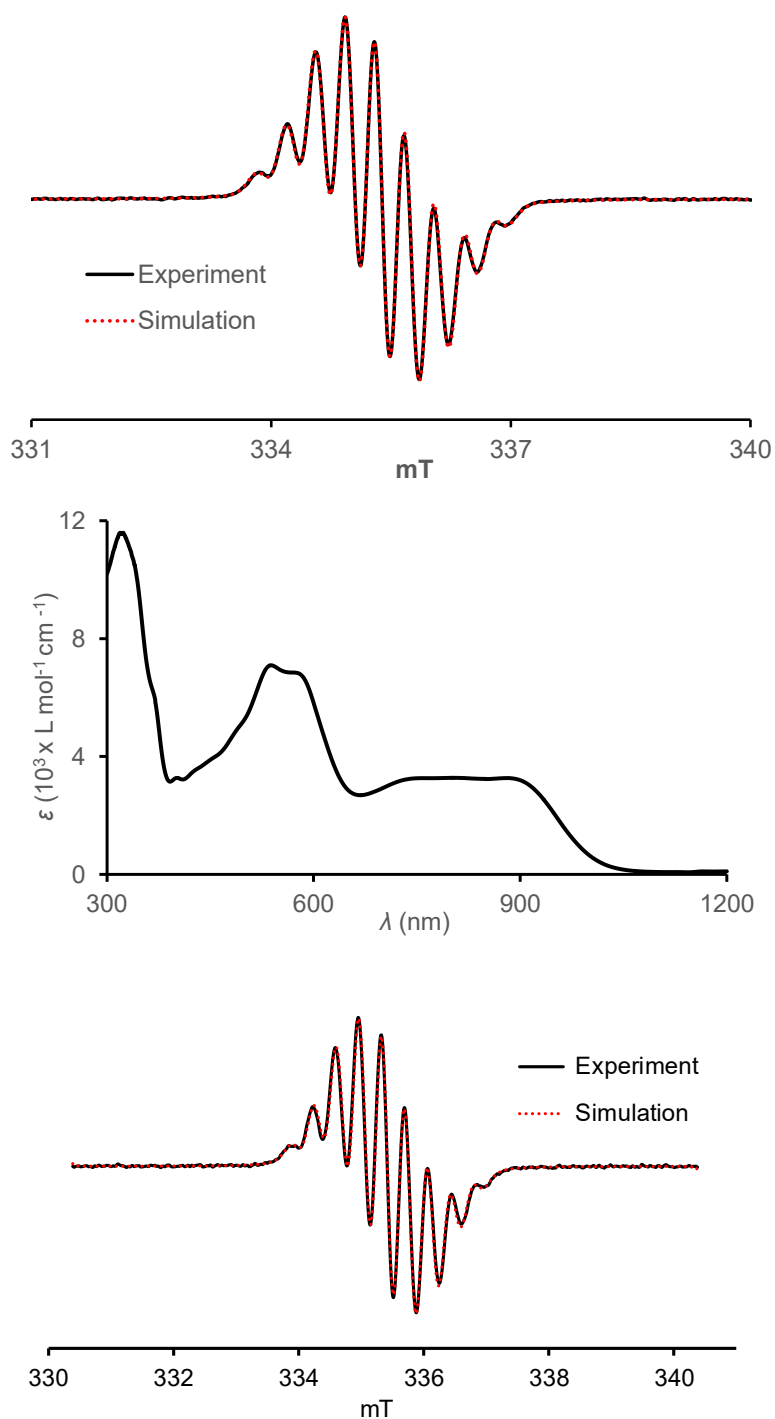

**Fig. S5.** Enlarged Figure 4 in the main text with additional details: EPR and UV-vis-NIR spectra of radical cation  $\mathbf{1}^+\text{BF}_4^-$  in DCM at room temperature. Top panel: EPR ( $\nu = 9.4058$  GHz, label: CS294r1) spectrum of 0.58 mM  $\mathbf{1}^+\text{BF}_4^-$  prior to dilution for UV-vis-NIR spectra; spin concentration is  $\sim 82\%$ . Middle panel: UV-vis-NIR absorption spectrum (UV label: CS2294-1200nm) of 0.30 mM  $\mathbf{1}^+\text{BF}_4^-$ . Bottom panel: EPR ( $\nu = 9.4059$  GHz, label: CS296r1) spectrum of 0.30 mM  $\mathbf{1}^+\text{BF}_4^-$  following UV-vis-NIR spectra; spin concentration is  $\sim 80\%$ . Simulation (garlic, EasySpin, rmsd = 0.288):  $A(^{14}\text{N}) = 9.984$  MHz,  $g = 2.0029$ , line-width = 0.207 mT (Gaussian) and 0.109 mT (Lorentzian).



### 1.d3 EPR and UV-vis-NIR spectral monitoring: generation of radical cation $1^{+\bullet}\text{BF}_4^-$ using

$[\text{Th}]^{+\bullet}[\text{BF}_4]^-$  in DCM.

**Table S2.** Summary of preparation of radical cation  $1^{+\bullet}\text{BF}_4^-$  using  $[\text{Th}]^{+\bullet}[\text{BF}_4]^-$  in DCM.

| run no | sample label | 1-D <sub>2</sub> (mg) | Initial concentration of 1-D <sub>2</sub> (mM) <sup>a</sup> | Figures and comments                                                                                                                                                                                                           |
|--------|--------------|-----------------------|-------------------------------------------------------------|--------------------------------------------------------------------------------------------------------------------------------------------------------------------------------------------------------------------------------|
| 1      | AO1035       | 0.80                  | 1.20                                                        | The best run: vis-NIR spectra (Fig. S7), EPR (with simulation), UV-vis-NIR, no change in spin conc. after 24 h at rt (Fig. S8); quench with Cp* <sub>2</sub> Fe, <sup>1</sup> H NMR (Fig. S9).                                 |
| 2      | AO1033       | 0.83                  | 0.87                                                        | First addition of $[\text{Th}]^{+\bullet}[\text{BF}_4]^-$ gave radical cation with an admixture of diradical dication; spin conc. of 96%.                                                                                      |
| 3      | AO688        | 0.80                  | 1.96                                                        | No spin concentrations; 2 <sup>nd</sup> addition of $[\text{Th}]^{+\bullet}[\text{BF}_4]^-$ gave a mixture of radical cation and diradical dication: Fig. S10; quench with Cp* <sub>2</sub> Fe, <sup>1</sup> H NMR (Fig. S11). |

<sup>a</sup> Based on extinction coefficient for the  $\lambda = 407$  nm band of 1-D<sub>2</sub> in DCM (Figure S6) and initial UV-vis spectra of 1-D<sub>2</sub> that were obtained just before addition of  $[\text{Th}]^{+\bullet}[\text{BF}_4]^-$  in DCM (UV-vis labels: AO688u1 and u2, AO1033u1 and u2, AO1035u1 and u2).

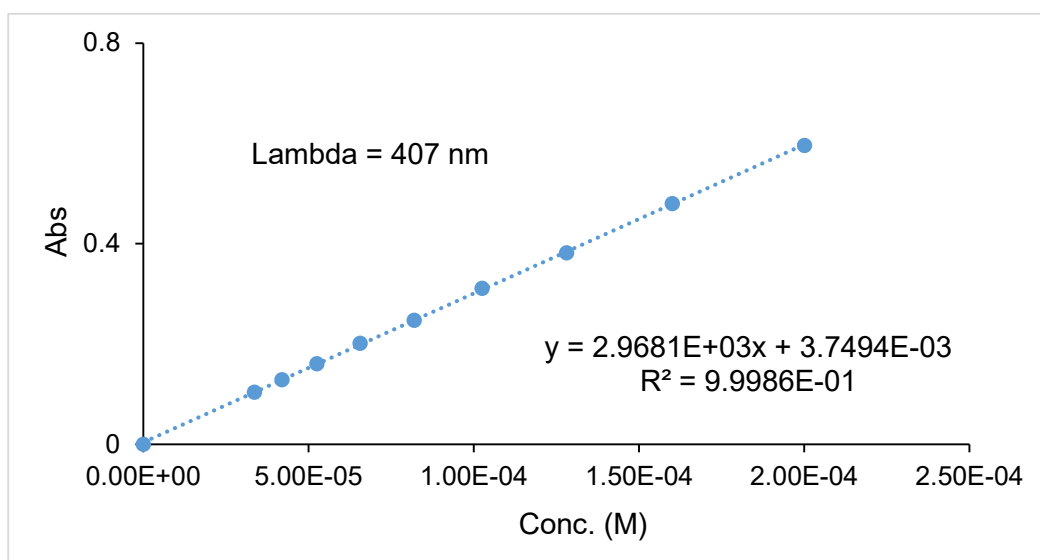

**Fig. S6.** Determination of molar extinction coefficient for conjoined [5]helicene 1-D<sub>2</sub> in DCM.

**Radical cation  $1^{+\bullet}\text{BF}_4^-$  generated using  $[\text{Th}]^{+\bullet}[\text{BF}_4]^-$ : sample label: AO1035.** Conjoined [5]helicene 1-D<sub>2</sub> (KS1242-1, MW = 899.3, 0.80 mg, 0.89  $\mu\text{mol}$ ) and a small teflon-coated magnetic bar were placed into a home-made Schlenk vessel (4-mm quartz EPR sample tube, 1-mm pathway UV-vis cell and Schlenk compartment for mixing of reagents)<sup>S2,S10</sup> equipped with high-vacuum PTFE stopcocks. The Schlenk was dried under high vacuum at 70 °C for overnight. Dichloromethane (DCM) was vacuum transferred to the UV-vis cell. The baseline for UV-vis-NIR spectra was obtained. Subsequently, total volume of 0.72 mL of DCM (volume estimate based on weight of 1-D<sub>2</sub> and its UV-vis spectrum) was

vacuum transferred to the Schlenk compartment. The solution of **1-D<sub>2</sub>** was stirred briefly at r.t. to obtain a clear yellow solution. The solution was decanted to the UV-vis-NIR cell and UV-vis-NIR absorption spectra were taken (label: AO1035u1-u2), providing initial concentration estimate of **1-D<sub>2</sub>** as 1.23 mM (Fig. S6). Subsequently, series of background EPR spectra, together with Tempone in DCM, were obtained; no detectable EPR signal from sample containing 1.23 mM **1-D<sub>2</sub>** was observed. [Th]<sup>++</sup>[BF<sub>4</sub>]<sup>-</sup> was weighed inside N<sub>2</sub>-glovebag and transferred to a Schlenk vessel. The vessel was attached to high-vacuum line and evacuated for 15 min. DCM was added to the Schlenk vessel by vacuum transfer to produce a deep purple solution. The first small portion of solution of [Th]<sup>++</sup>[BF<sub>4</sub>]<sup>-</sup> (0.11 mL) was then added to the solution of conjoined [5]helicene **1-D<sub>2</sub>** to produce the purple solution. The reaction mixture was consecutively decanted to the UV-vis-NIR cell and the EPR tube, respectively. The vis-NIR and EPR spectra were consecutively taken (e.g., vis-NIR in Fig. S7); spin concentration of this sample was 43%; peaks corresponding to unreacted **1-D<sub>2</sub>** could be observed in the UV-vis-NIR spectra. Additional solution of [Th]<sup>++</sup>[BF<sub>4</sub>]<sup>-</sup> (0.11 mL) was added to the Schlenk vessel and the consecutive EPR and vis-NIR spectra were recorded (Figs. S7 and S8). The vessel was attached to high vacuum line and evacuated briefly. Dichloromethane was added by vacuum transfer to maintain the concentration of the solution. EPR spectra, taken at 150 K (A1036r34-r36), showed a single broad signal with peak-to-peak linewidth of 1.41 mT.

Following spectroscopic monitoring experiments, decamethylferrocene (Cp\*<sub>2</sub>Fe, 0.38 mg, 1.157 μmol) was added to the reaction mixture to produce the yellow solution; the EPR and UV-vis-NIR spectra showed absence of the radical cation of conjoined [5]helicene. The reaction mixture was transferred to a vial and evaporated under nitrogen flow. The crude mixture was evacuated under high vacuum for overnight to produce 1.06 mg of green solid. The <sup>1</sup>H NMR (700 MHz, acetone-*d*<sub>6</sub>, AO-10-35-crd) spectrum showed the conjoined [5]helicene **1-D<sub>2</sub>** as a major product (Figure S9).

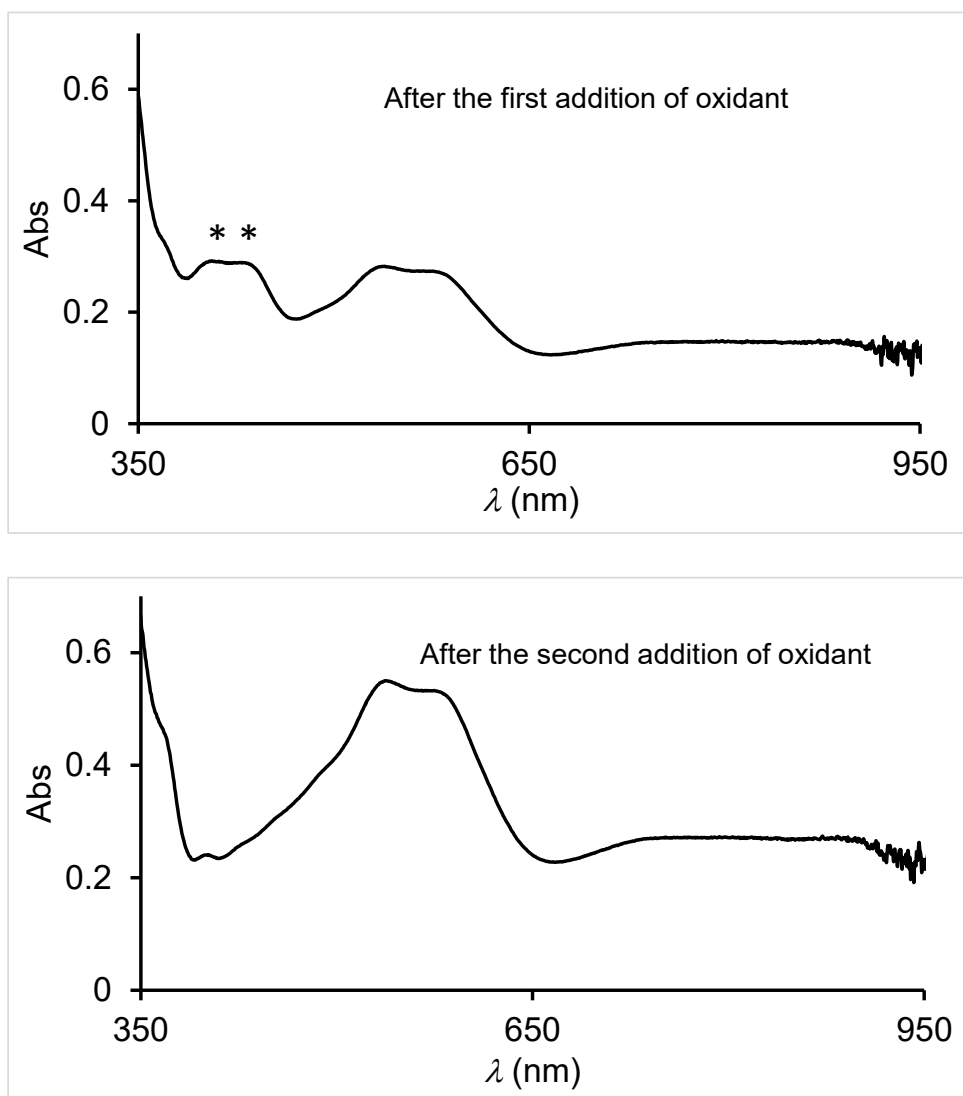

**Fig. S7.** Vis-NIR absorption spectra (vis\_NIR labels: AO1035u4 and AO1035u8) at ambient temperature obtained during oxidation of  $1-D_2$  with  $[\text{Th}]^{+}[\text{BF}_4]^{-}$  showing radical cation  $1^{+}\text{BF}_4^{-}$ . EPR spin concentrations of 43% and 98% were measured for these samples. For the second sample, EPR spectrum and replotted vis-NIR spectrum are shown in the next figure (Fig. S8). In the vis-NIR spectrum of first sample (top panel), asterisks (\*) indicate peaks from starting material  $1-D_2$ .

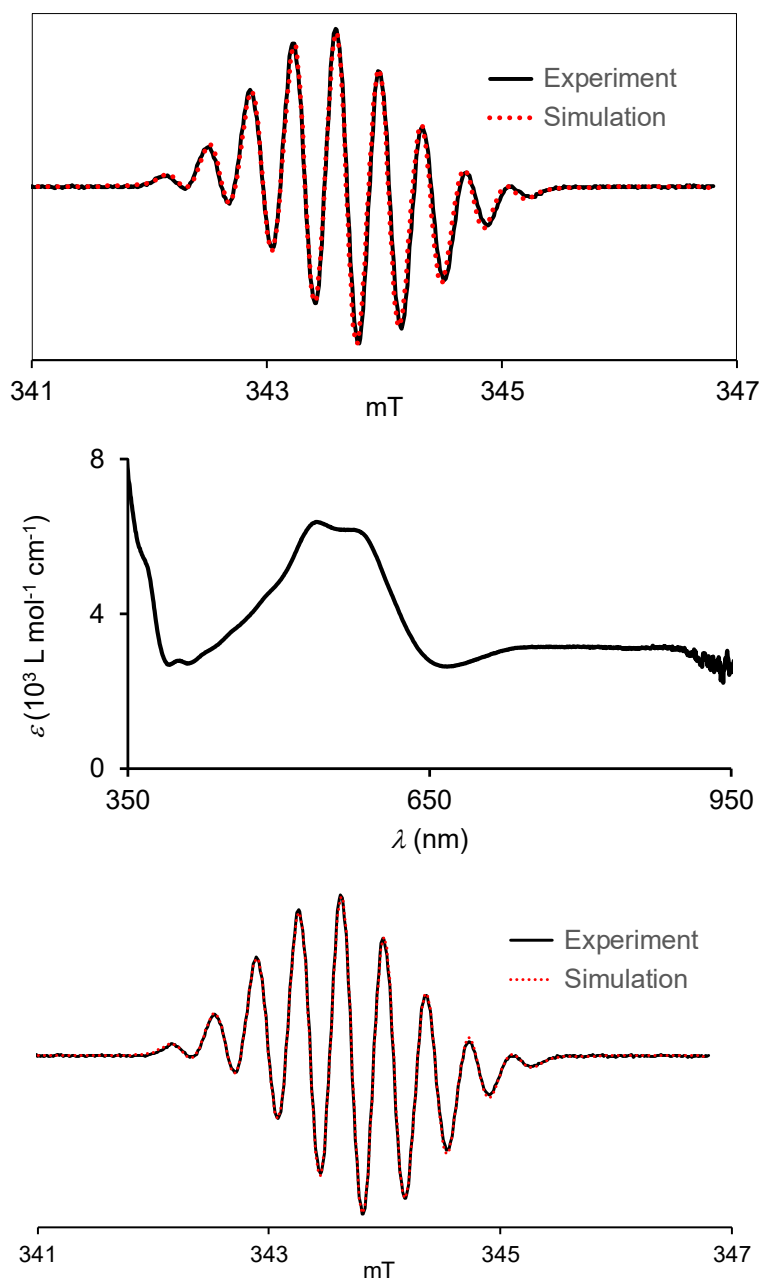

**Fig. S8.** Consecutive EPR and vis-NIR absorption spectra: oxidation of **1**- $D_2$  with  $[\text{Th}]^{++}[\text{BF}_4]^-$  showing radical cation  $\mathbf{1}^{++}\text{BF}_4^-$  (sample label: AO1035). Top panel: EPR ( $\nu = 9.6356$  GHz, EPR label: AO1035r23) spectrum (spin conc. of 98%) prior to vis-NIR spectrum; simulation (Garlic, EasySpin, rmsd = 0.352):  $A(^{14}\text{N}) = 10.04$  MHz,  $g = 2.0030$ , line-width = 0.144 mT (Gaussian) and 0.078 mT (Lorentzian). Middle panel: vis-NIR absorption spectrum (vis\_NIR label: AO1035u8) at ambient temperature: bands at  $\lambda_{\text{max}} = 538, 567, 744, 884$  nm have the extinction coefficients:  $\epsilon_{538} = 6.4 \times 10^3$ ,  $\epsilon_{567} = 6.2 \times 10^3$ ,  $\epsilon_{744} = 3.1 \times 10^3$ , and  $\epsilon_{884} = 3.2 \times 10^3$  L mol $^{-1}$  cm $^{-1}$ . Bottom panel: EPR ( $\nu = 9.6359$  GHz, EPR label: AO1035r26) spectrum following vis-NIR spectrum, obtained after 24 h at rt; spin conc. = 99%; simulation (Garlic, EasySpin, rmsd = 0.200):  $A(^{14}\text{N}) = 10.20$  MHz,  $g = 2.0029$ , line-width = 0.192 mT (Gaussian) and 0.043 mT (Lorentzian).

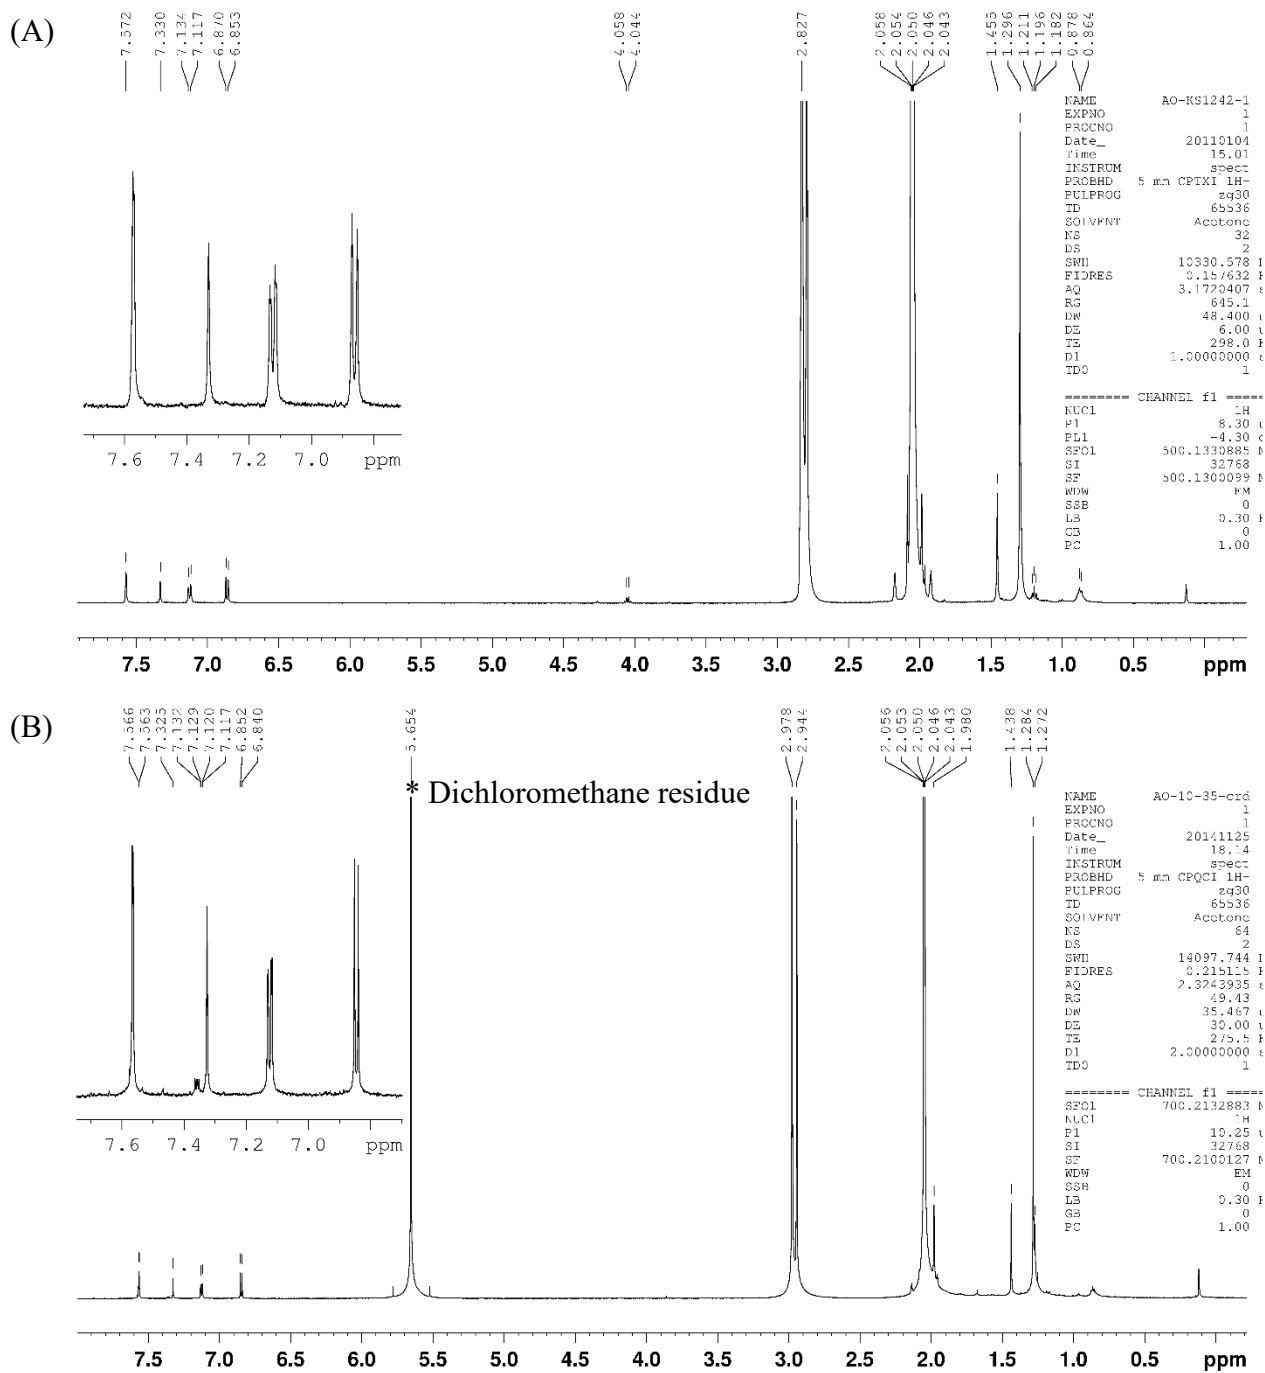

**Fig. S9.** (A)  $^1\text{H}$  NMR spectrum (500 MHz, acetone- $d_6$ , label: AO-KS1242-1) of conjoined [5]helicene 1- $D_2$ . (B)  $^1\text{H}$  NMR spectrum (700 MHz, acetone- $d_6$ , label: AO-10-35-crd) of the crude sample obtained after addition of  $\text{Cp}^*\text{Fe}$ .

**Radical cation  $1^{+}BF_4^{-}$  generated using  $[Th]^{+}[BF_4]^{-}$ : sample label, AO688.** Conjoined [5]helicene **1- $D_2$**  (KS1242-1, MW = 899.3, 0.80 mg, 0.89  $\mu$ mol) and a small teflon-coated magnetic bar were placed into a home-made Schlenk vessel (4-mm quartz EPR sample tube, 1-mm pathway UV-vis cell and Schlenk compartment for mixing of reagents)<sup>S2,S10</sup> equipped with high-vacuum PTFE stopcocks. The Schlenk vessel was dried under high vacuum at 70 °C for overnight. Dichloromethane was vacuum transferred to the UV-vis-NIR cell. The baseline for UV-vis-NIR spectra was obtained. Subsequently, total volume of 0.45 mL dichloromethane (volume estimate based on weight and UV-vis spectrum of **1- $D_2$** ) was vacuum transferred to the Schlenk compartment. The solution of conjoined amine was stirred briefly at r.t. to obtain a clear yellow solution. The solution was decanted to the UV-vis-NIR cell and UV-vis-NIR spectra were taken (AO688u1-3), providing initial concentration estimate of **1- $D_2$**  as 1.96 mM (Fig. S6).  $[Th]^{+}[BF_4]^{-}$  was weighed inside argon-filled Vacuum Atmospheres glovebox and transferred to a Schlenk vessel inside glovebox. The vessel was transferred from the glovebox to high-vacuum line and then dichloromethane was vacuum transferred. This first portion of solution of  $[thianthrene]^{+}[BF_4]^{-}$  (0.33 mL,  $\sim$ 1 equiv) was added to produce the purple solution. The reaction solution was consecutively decanted to the UV-vis-NIR cell and the EPR tube. The UV-vis-NIR and EPR spectra were consecutively taken. Additional solution of  $[thianthrene]^{+}[BF_4]^{-}$  ( $\sim$ 1+ equiv) was added to the Schlenk vessel and the UV-vis-NIR and EPR spectra were recorded.

Following spectroscopic monitoring experiments, decamethylferrocene ( $Cp^*_2Fe$ , 0.37 mg, 1.13  $\mu$ mol, 1.3 equiv) was added to the reaction mixture to produce the yellow solution and the UV-vis-NIR and EPR spectra were consecutively recorded, revealing absence of the radical cation. The reaction mixture was transferred to a vial and evaporated under nitrogen flow. The crude mixture was evacuated under high vacuum for overnight to produce yellow solid (1.6 mg). The  $^1H$  NMR (500 MHz, acetone- $d_6$ , AO-6-88-crd) spectrum showed the conjoined [5]helicene **1- $D_2$**  and excess of thianthrene.

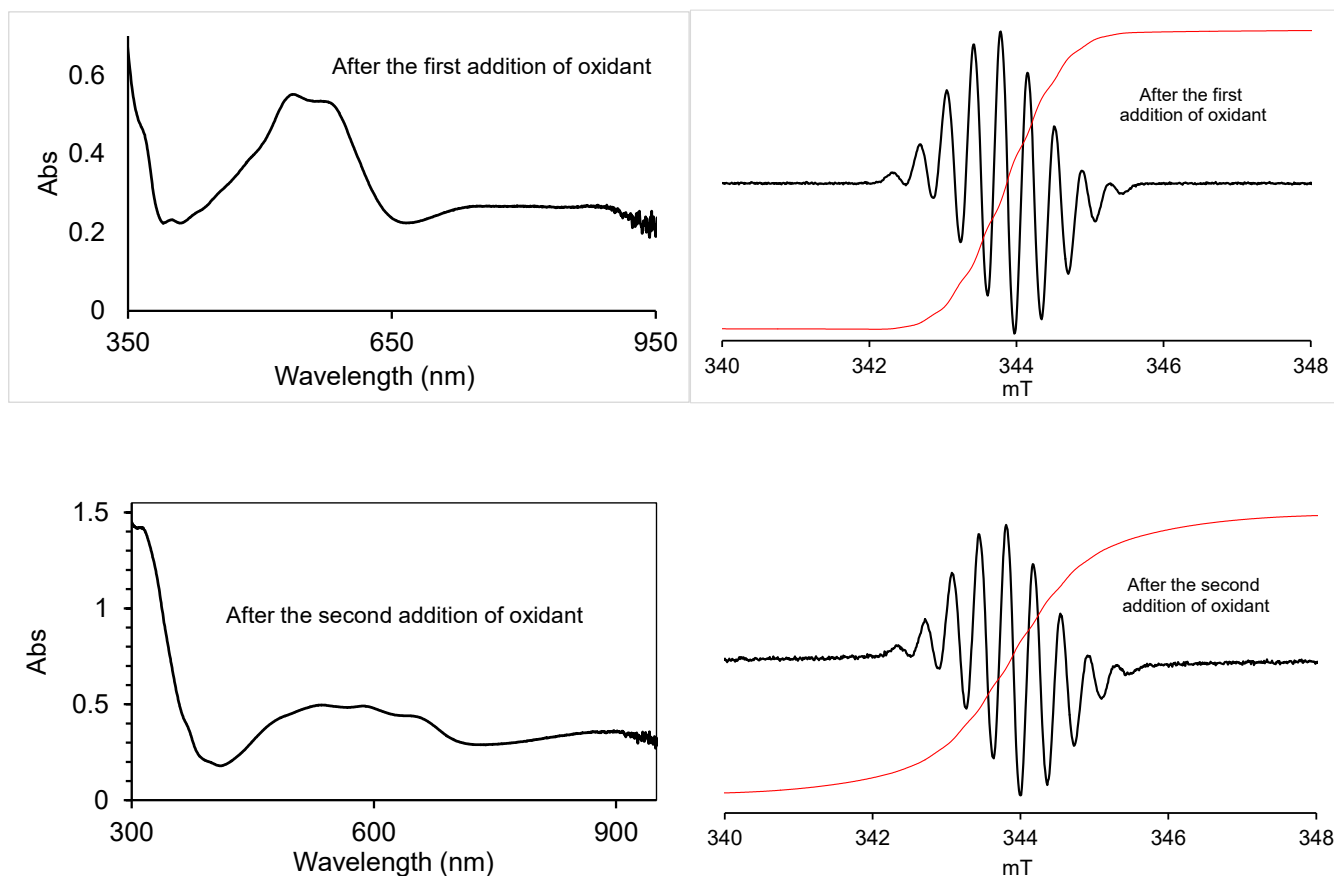

**Fig. S10.** Consecutive EPR ( $\nu = 9.6356$  GHz, EPR label: AO1035r23, sample label: AO1035) and vis-NIR spectra (vis\_NIR label: AO1035u8) at ambient temperature in DCM obtained during oxidation of **1**- $D_2$  with  $[\text{Th}]^{++}[\text{BF}_4]^-$  (first addition of  $\sim 1$  equiv and second addition of  $\sim 1+$  equiv). Top panels: spectra showing radical cation  $\mathbf{1}^{+\bullet}\text{BF}_4^-$ . Bottom panels: spectra showing a mixture of radical cation  $\mathbf{1}^{+\bullet}\text{BF}_4^-$  and diradical dication  $\mathbf{1}^{2\bullet 2+}2\text{BF}_4^-$ ; in the EPR spectrum at room temperature in DCM, only radical cation can be seen as the triplet state of the diradical dication is very likely broadened to the baseline at these conditions, e.g., compare double integration lines (in red) in the two EPR spectra.

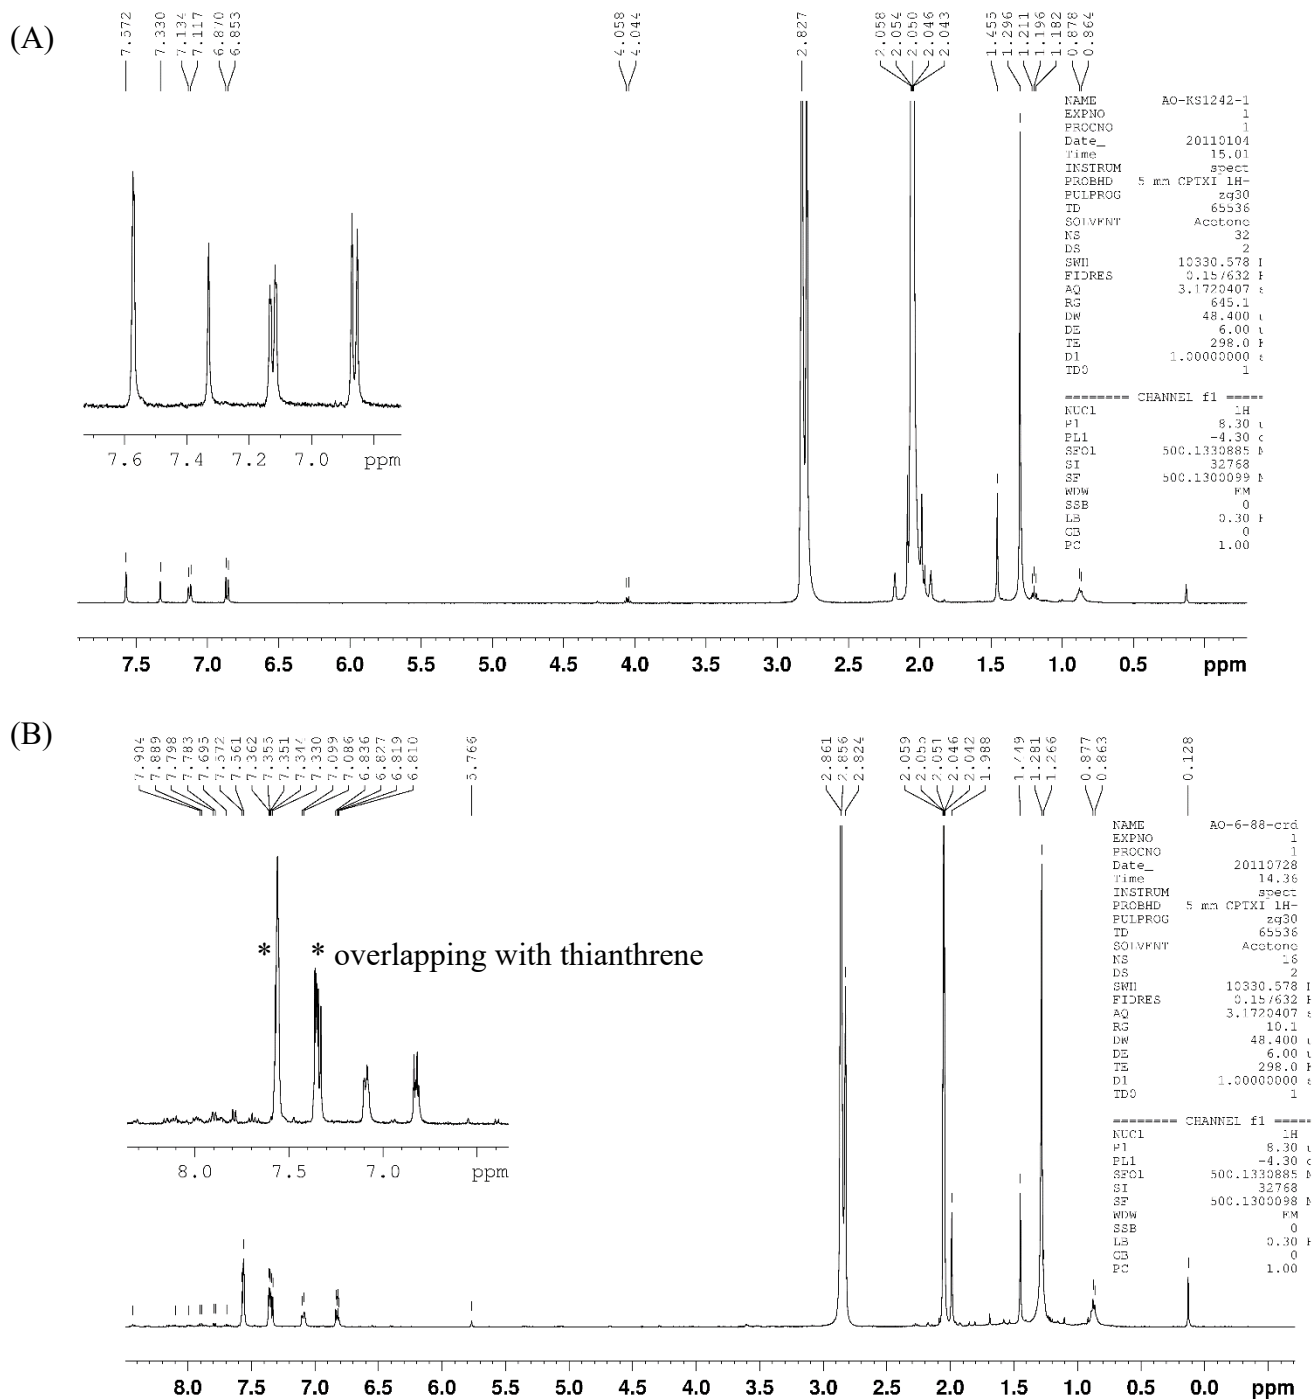

**Fig. S11.** (A)  $^1\text{H}$  NMR spectrum (500 MHz, acetone- $d_6$ , label: AO-KS1242-1) of conjoined [5]helicene 1- $D_2$ . (B)  $^1\text{H}$  NMR spectrum (500 MHz, acetone- $d_6$ , label: AO-6-88-crd) of the crude sample obtained after adding  $\text{Cp}^*\text{Fe}$ .



#### 1.d4 Preparation of diradical dication $1^{2\cdot2+} 2\text{SbF}_6^-$ by oxidation of *rac*-1-*D*<sub>2</sub> using $[\text{NO}]^+[\text{SbF}_6]^-$ .

**Table S3.** Summary of preparation of diradical dication  $1^{2\cdot2+} 2\text{SbF}_6^-$  using  $[\text{NO}]^+[\text{SbF}_6]^-$  in DBP.

| run no | sample label | 1- <i>D</i> <sub>2</sub> (mg) | $[\text{NO}]^+[\text{SbF}_6]^-$ (equiv) | Figures and comments                                                                                                                                                                                                                                                 | Recovered 1- <i>D</i> <sub>2</sub> (mg, %) |
|--------|--------------|-------------------------------|-----------------------------------------|----------------------------------------------------------------------------------------------------------------------------------------------------------------------------------------------------------------------------------------------------------------------|--------------------------------------------|
| 1      | HZ1164       | 0.34                          | (3.8)+(3.2)                             | Initial $\chi T = 0.872 \pm 0.004$ at 117 K; quantitative EPR (105 – 330 K), giving $2J = 145$ K ( Fig. S12); EPR, stability on air (Fig. S13); EPR (with simulation), UV-vis-NIR, EPR (Fig. S14); quench with $\text{Cp}^*\text{Fe}$ , $^1\text{H}$ NMR (Fig. S15). | 0.29, 85%                                  |
| 2      | HZ1015       | 0.25                          | 3+(1.6)                                 | Quantitative EPR (105 – 340 K, Fig. S16), quantitative EPR spectra at 295 K following annealing at 340 K for 10 – 120 min (Fig. S17), EPR, UV-vis-NIR, EPR (Fig. S18); quench with $\text{Cp}^*\text{Fe}$ , $^1\text{H}$ NMR and ESI MS (Figs. S19&20).              | 0.24, 96%                                  |
| 3      | HZ1001       | 0.29                          | (2.2)+2+4                               | EPR spectrum (with simulation) and power saturation plot (Fig. S21); quench with $\text{Cp}^*\text{Fe}$ , $^1\text{H}$ NMR and ESI MS (Figs. S22&23).                                                                                                                | 0.24, 83%                                  |
| 4      | CS332        | 0.47                          | 5.6                                     | EPR spectra of 1.10 mM diradical dication (Fig. S24); determination of half-life = 16 days on air at room temperature (Fig. S25).                                                                                                                                    | -                                          |
| 5      | CS374        | 0.31                          | 5.5                                     | Quantitative EPR (117 – 196 K) spectra giving $2J = 157 \pm 7$ K (Fig. S26); quench with $\text{Cp}^*\text{Fe}$ , $^1\text{H}$ NMR and ESI MS (Figs.S27&S28).                                                                                                        | 0.29, 94%                                  |

**Diradical dication  $1^{2\cdot2+} 2\text{SbF}_6^-$  generated using  $[\text{NO}]^+[\text{SbF}_6]^-$  in DBP: sample label, HZ1164.** To the starting material 1-*D*<sub>2</sub> (0.34 mg, 0.38  $\mu\text{mol}$ , CS0188 & CS0192) in a custom-made Schlenk vessel with 4-mm EPR tube,<sup>S2</sup> evacuated on vacuum line at room temperature for several days, distilled dibutyl phthalate (DBP,  $\sim 100$   $\mu\text{L}$ ) was added under argon flow to obtain a yellow solution. Subsequently, the solution was cooled to  $-30$   $^\circ\text{C}$  by ethanol-liquid nitrogen bath, and the oxidant,  $\text{NO}\text{SbF}_6$ , in distilled DBP (60  $\mu\text{L}$ , 3.8 equiv, 6.4 mg/1.0 mL) was added under flow of argon. The reaction mixture was mixed with stir bar at  $-30$   $^\circ\text{C}$  and evacuated until vacuum build up inside the vessel (pressure = 0.9 mTorr). During this process the color of the reaction mixture changed from yellow to dark blue-purple. EPR spectrum was obtained at 243 K (label: HZ1164r1), showing diradical with a significant admixture of monoradical.

Subsequently, an additional amount of oxidant was added (50  $\mu\text{L}$ , 3.2 equiv, 6.4 mg/1.0 mL) under flow of argon at  $-30$   $^\circ\text{C}$ . As before, the reaction mixture was mixed with stir bar at  $-30$   $^\circ\text{C}$  and evacuated until vacuum build up inside the vessel (pressure = 0.9 mTorr). EPR spectra were obtained at 243 K and 295 K (EPR labels: HZ1164r2-r8), showing still a small admixture of monoradical. Then, the reaction mixture was evacuated for 30 min at rt, and subsequently EPR spectra were obtained (EPR label: HZ1164r9 and r10). The the reaction mixture was evacuated again for 10 min at rt, and then EPR spectra at 243 K and 140 K were obtained (EPR label: HZ1164r11-r15), showing absence of monoradical. The dark blue-purple solution was stored in liquid nitrogen.

Subsequently, the EPR tube was attached to the vacuum line. The reaction mixture was diluted by distilled dibutyl phthalate (200  $\mu\text{L}$ ). The dark blue mixture was mixed at  $-20$   $^\circ\text{C}$  thoroughly until homogeneous solution was obtained, and then evacuated to build up pressure of 0.9 mTorr inside the

vessel at  $-20\text{ }^{\circ}\text{C}$ . EPR spectra of the dark blue-purple solution (total height 6.20 cm, 0.816 mM) were obtained at 117 K, together with spectra for Tempone reference in DBP (1.005 mM) (EPR label: HZ1164r16-r40); the initial  $\chi T = 0.872 \pm 0.004$  ( $n = 6$ ) at 117 K was obtained. The dark blue solution was stored in liquid nitrogen.

Subsequently, quantitative EPR spectra (sample: HZ1164, 0.816 mM) at variable temperature were obtained in the 105 – 330 K range (Figure S12, top and bottom panels) using 1.005 mM TEMPONE in dibutyl phthalate as reference.

Subsequently, quantitative EPR spectra (sample: HZ1164, 0.816 mM) at room temperature, following annealing of the sample on air at room temperature for 0 – 2 h were obtained (Figure S13).

For diradical dication (sample: HZ1164, 0.816 mM), EPR spectra were obtained at 117 K to re-check the spin concentration (EPR labels: CS291r1-r11). Using Tempone in DBP (0.975 mM) as reference, the spin concentration was 245% ( $\chi T = 0.918 \pm 0.009$  ( $n = 2$ )). Subsequently, the solution was diluted to 0.301 mM with DBP under flow of argon. Then this solution was transferred to a custom-made Schlenk vessel with 2 mm UV cuvette under flow of argon. In another similar custom-made Schlenk vessel with 2 mm UV cuvette, DBP was prepared as reference. UV-vis-NIR spectra were obtained with these 2 cells (Figure S14). After finishing UV-vis-NIR experiments, diradical dication solution in UV cuvette was transferred back to a new 4 mm EPR tube under argon flow. Sample was frozen in the liquid nitrogen.

On the next day, the spin concentration of diradical dication solution was measured again (Figure S14). Using the same reference (tempone in DBP, 0.975 mM), the spin concentration was 237%,  $\chi T = 0.891 \pm 0.016$  ( $n = 2$ ), at 117 K (EPR labels: CS293r1-r9).

Finally, the EPR tube was attached to the vacuum line, the reaction was quenched by addition of bis(pentamethylcyclopentadienyl)iron(II) in DCM (1.34 mg, 10 eq). The color changed from blue-purple to yellow. The solution was transferred to a vial and evaporated by  $\text{N}_2$ , which was purified by column chromatography (regular silica gel, pentane/DCM, 5:1) in with exclusion of light, and then analytical TLC plate to obtain a yellow powder (0.29 mg, 85% recovery).  $^1\text{H}$  NMR spectrum (400 MHz, acetone- $d_6$ , label: HZ1164 reduced by CS-plate) data of sample showed the starting material (Figure S15).

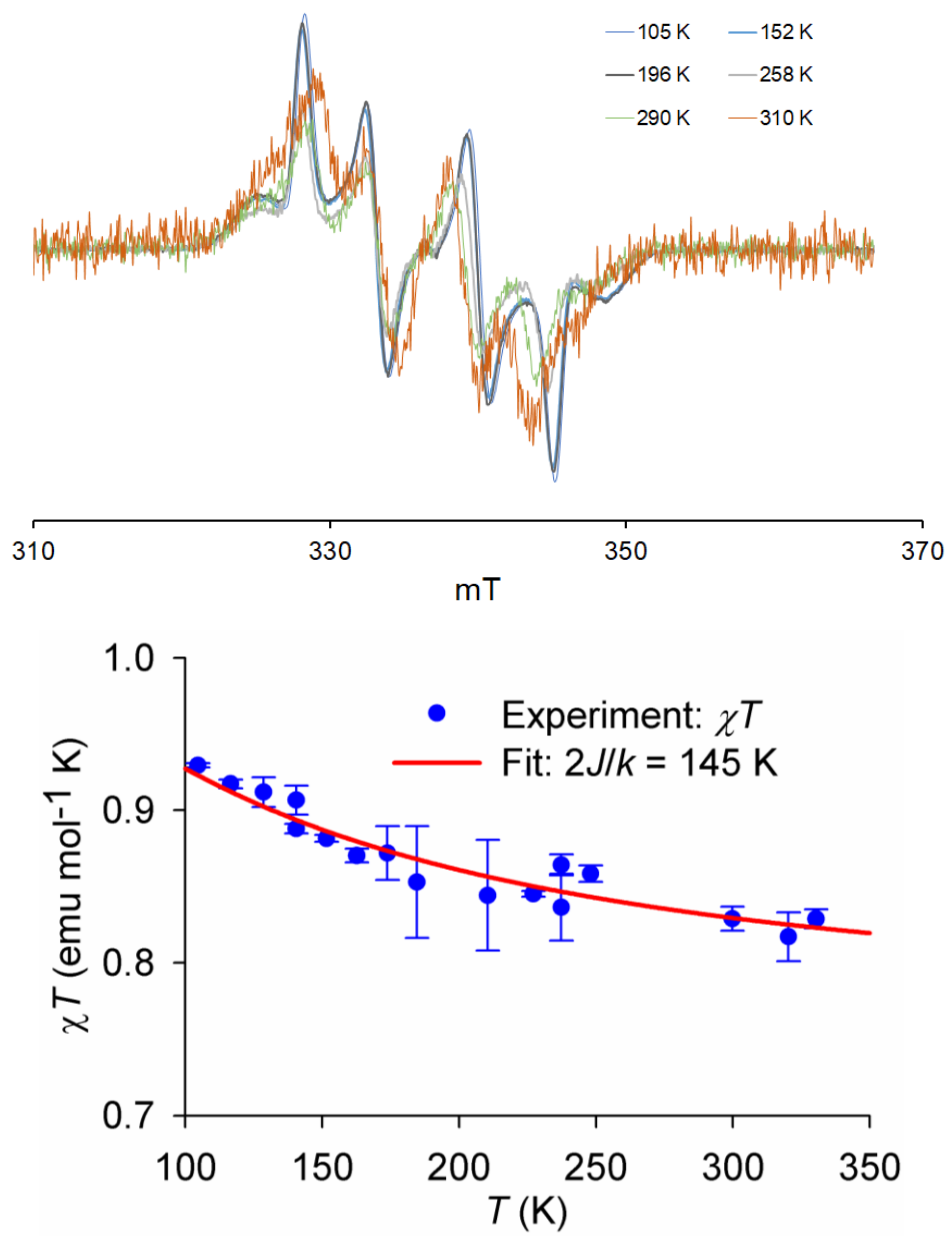

**Fig. S12.** Top panel: selected EPR spectra of 0.82 mM diradical dication  $\mathbf{1}^{2\cdot 2+} 2\text{SbF}_6^-$  (sample label: HZ1164) in DBP in the 105 – 310 K temperature range. Bottom panel (same graphic as in Figure 6, main text): quantitative EPR spectroscopy of 0.82 mM diradical dication  $\mathbf{1}^{2\cdot 2+} 2\text{SbF}_6^-$  in DBP (sample label: HZ1164) with 1.00 mM TEMPONE in DBP as a reference: experimental values of  $\chi T$  (mean  $\pm$  SE), the product of paramagnetic susceptibility ( $\chi$ ) and  $T$  in the  $T = 105 - 330$  K range; final numerical fit with no weighing and one variable parameter,  $2J/k = 145 \pm 4$  K (mean  $\pm$  SE). The raw average values of  $\chi T$  vs  $T$  were fit to the Bleaney–Bowers equation with two variable parameters,  $J/k =$  exchange coupling constant and  $N =$  weighing correction (parameter dependence = 0.989). Then, the value of  $N = 0.9695$  was used to correct the experimental values of  $\chi T$ . Subsequently one-parameter ( $J/k$ ) fit of corrected  $\chi T$  vs  $T$  to the Bleaney–Bowers equation gave  $J/k = 72.5 \pm 2$  K (mean  $\pm$  SE).

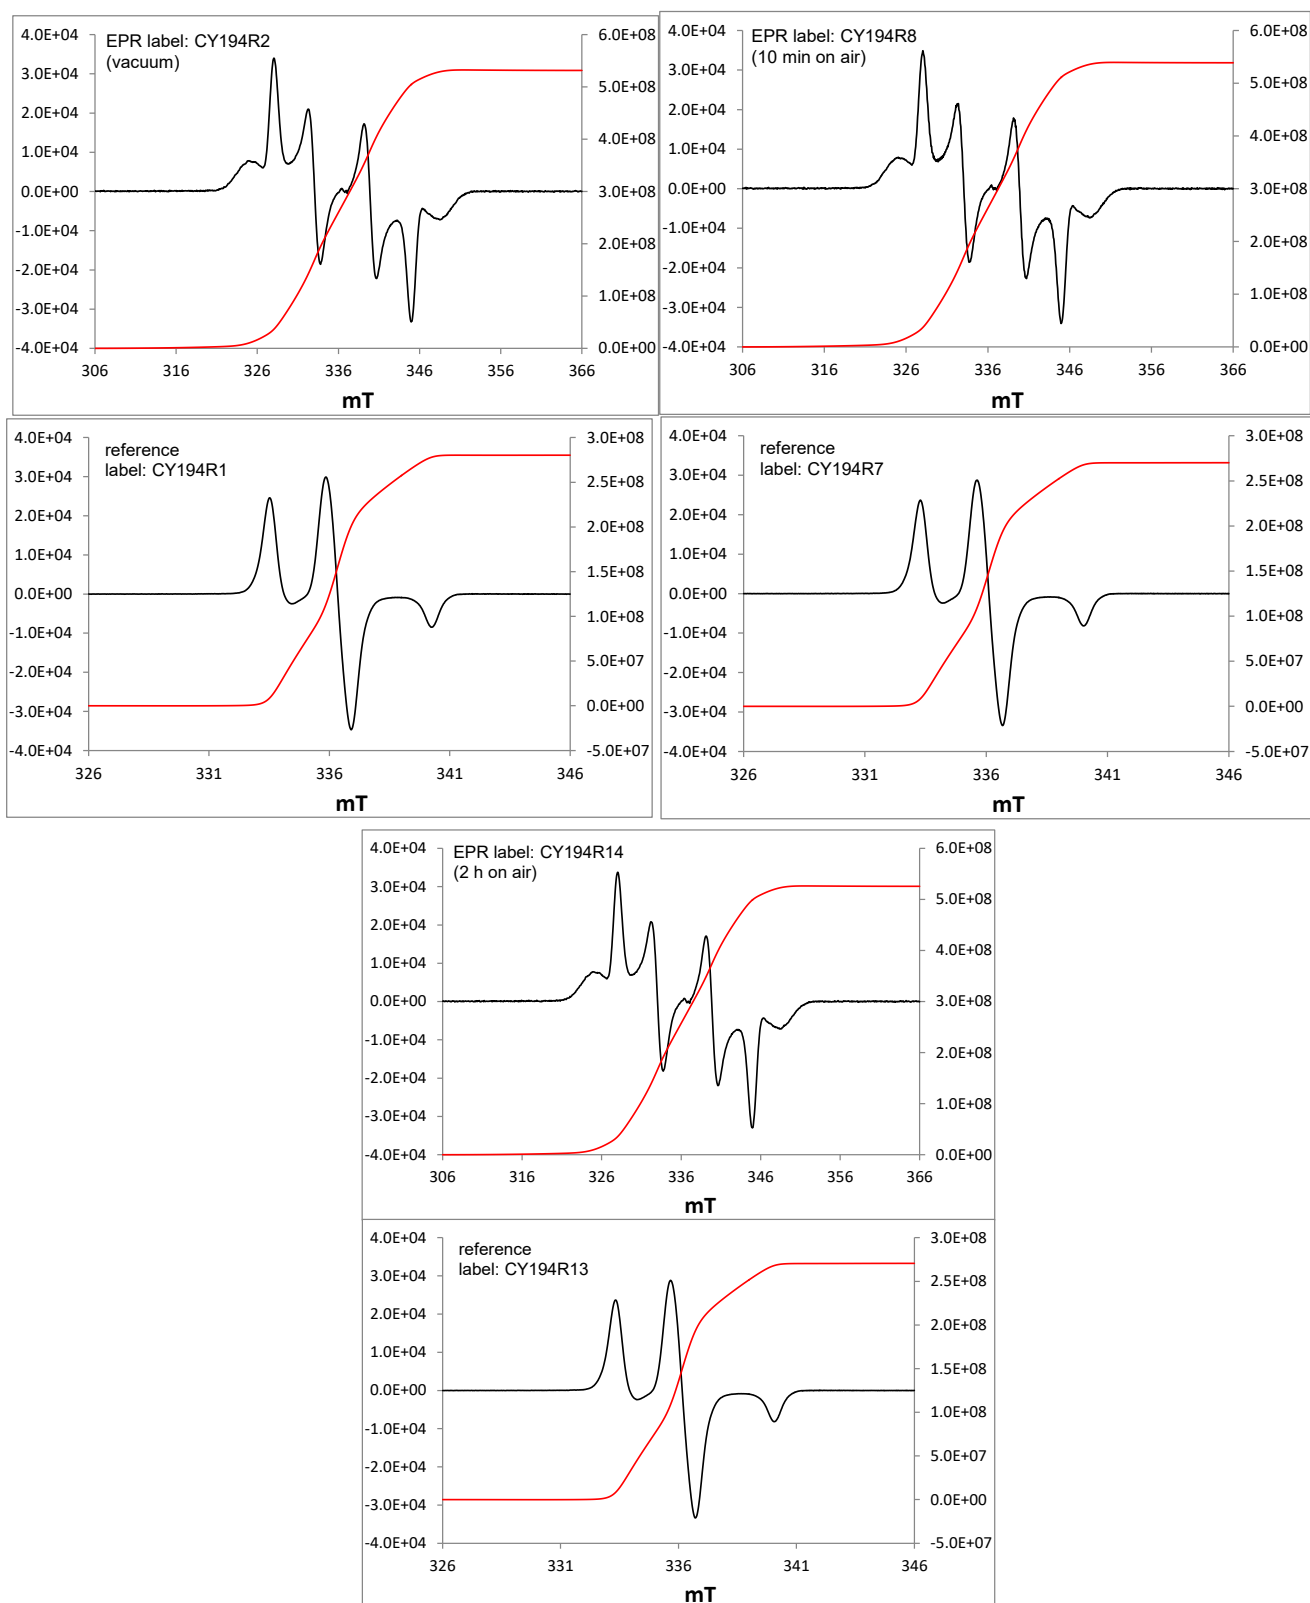

**Fig. S13.** EPR spectra of 0.82 mM diradical dication  $1^{2\cdot}2^+ 2\text{SbF}_6^-$  (sample label: HZ1164) and Tempone reference in DBP at 117 K, demonstrating stability of  $1^{2\cdot}2^+ 2\text{SbF}_6^-$  in DBP, upon exposure to air for 2 h at room temperature.

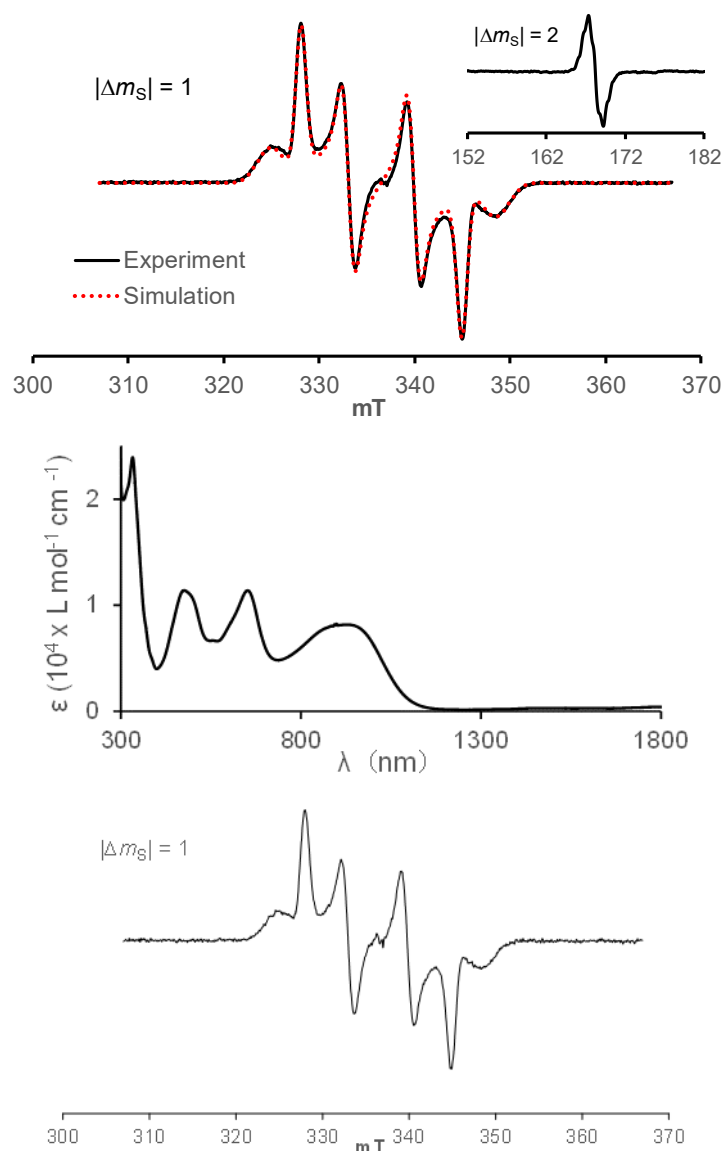

**Fig. S14.** Enlarged Figure 4 in the main text with additional details: EPR spectra at 117 K prior (top panel) and following (bottom panel) the UV-vis-NIR spectrum at room temperature. Top panel: EPR ( $\nu = 9.4387$  GHz, EPR label: CS291R4, sample label: HZ1164) spectrum (inset: the  $|\Delta m_s| = 2$  transition) with simulation, shown in the main text (Figure 5), obtained during oxidation of **1**- $D_2$  with  $[\text{NO}]^+[\text{SbF}_6]^-$  in dibutyl phthalate (DBP) showing 0.82 mM diradical dication  $\mathbf{1}^{2\cdot 2+} 2\text{SbF}_6^-$ . EPR spin counting at  $T = 117$  K (vs. Tempone in DBP), prior to UV-vis-NIR spectrum, showed  $\chi T \approx 0.92$  emu mol $^{-1}$  K. Spectral simulation of the  $|\Delta m_s| = 1$  region:  $|D/hc| = 1.11 \times 10^{-2}$  cm $^{-1}$ ,  $|E/hc| = 1.56 \times 10^{-3}$  cm $^{-1}$ ,  $|A_{zz}/hc|/2 = 7.3 \times 10^{-4}$  cm $^{-1}$ ,  $g_{xx} = 2.0036$ ,  $g_{yy} = 2.0035$ ,  $g_{zz} = 2.0025$ ;  $H$ -strain (MHz):  $H_x = 30.84$ ,  $H_y = 28.07$ ,  $H_z = 11.78$ ;  $g$ -strain:  $g_x = 0.0019$ ,  $g_y = 0.0021$ ,  $g_z = 0.0020$ ;  $D$ -strain (MHz):  $D = 2.421$ ,  $E = 0.387$ . Middle panel: repeat UV-vis-NIR spectrum of the identical sample of diradical dication  $\mathbf{1}^{2\cdot 2+} 2\text{SbF}_6^-$  (sample label: HZ1164) after dilution of its solution with DBP to 0.30 mM. Bottom panel: EPR spectrum ( $\nu = 9.4355$  GHz, EPR label: CS293R1, sample label: HZ1164) of 0.30 mM  $\mathbf{1}^{2\cdot 2+} 2\text{SbF}_6^-$  in DBP following the UV-vis-NIR spectrum. EPR spin counting at  $T = 117$  K showed  $\chi T \approx 0.89$  emu mol $^{-1}$  K.

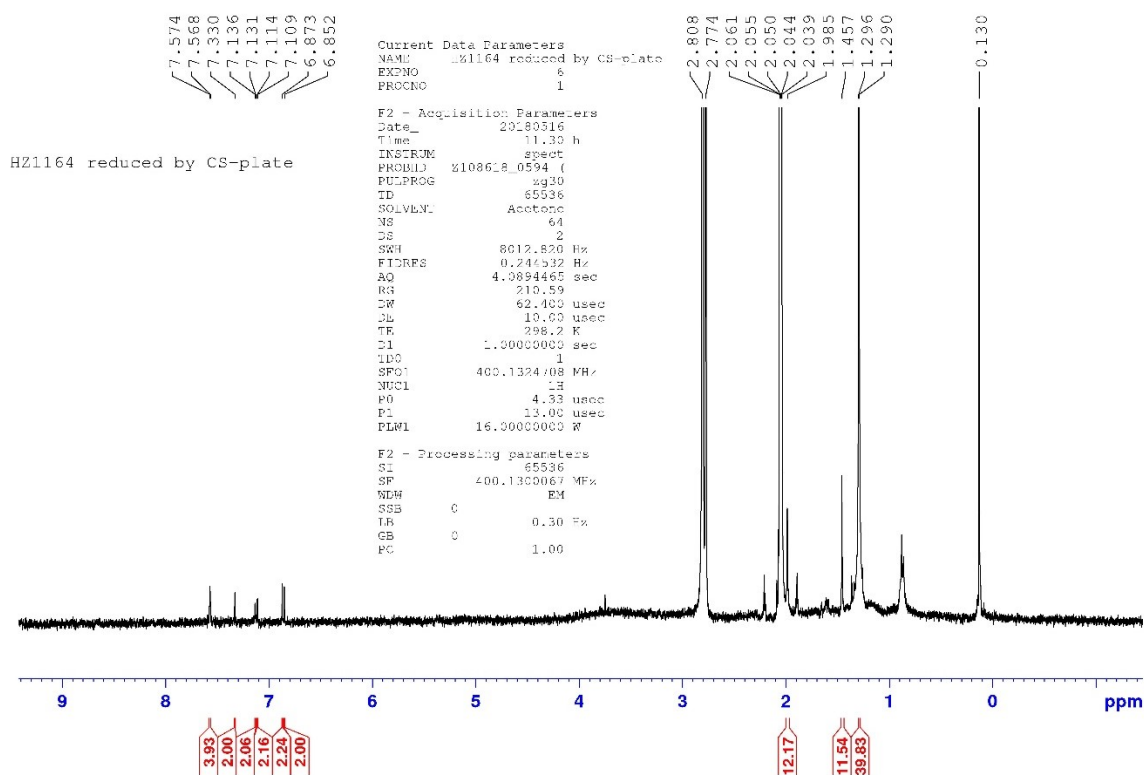

**Fig. S15.**  $^1\text{H}$  NMR spectrum (400 MHz, acetone- $d_6$ , label: HZ1164 reduced by CS-plate) of the sample obtained after quench of diradical dication  $\mathbf{1}^{2+2+} 2\text{SbF}_6^-$  in DBP, using  $\text{Cp}^*_2\text{Fe}$ , and purification. The spectrum is identical to that of starting material  $\mathbf{1-D}_2$ .

**Diradical dication  $\mathbf{1}^{2+2+} 2\text{SbF}_6^-$  generated using  $[\text{NO}]^+[\text{SbF}_6]^-$  in DBP: sample label, HZ1015.** To the starting material  $\mathbf{1-D}_2$  (0.25 mg, 0.28  $\mu\text{mol}$ , PB4\_68B-tl) in custom-made Schlenk vessel with 4-mm EPR tube,<sup>S2</sup> evacuated on vacuum line at room temperature for several days, distilled dibutyl phthalate (DBP,  $\sim 10 \mu\text{L}$ ) was added under argon flow to get a yellow solution. Subsequently, the solution was cooled to  $-30 \text{ }^\circ\text{C}$  by ethanol-liquid nitrogen bath, and the oxidant  $\text{NOSbF}_6$  in distilled DBP (30  $\mu\text{L}$ , 3 equiv, 13.6 mg/1.8 mL) was added under flow of argon. The reaction mixture was mixed with stir bar at  $-30 \text{ }^\circ\text{C}$  and evacuated until vacuum build up inside the vessel (pressure = 0.9 mTorr). During this process the color of the reaction mixture changed from yellow to green and finally dark blue-purple. EPR spectra were obtained at 240 K and 129 K (label: HZ1015r1 and r5 at 240 K; HZ1015r4 and r6 at 129 K). The dark blue solution was stored in liquid nitrogen.

Subsequently, the EPR tube was attached to the vacuum line, more oxidant was added under argon flow (16  $\mu$ L, 1.6 eq), mixed with stir bar at  $-30$   $^{\circ}$ C and evacuated until vacuum build up inside the vessel (pressure = 0.9 mTorr). EPR spectra were obtained at 240 K and 129 K (label: HZ1015r7 at 240 K; HZ1015r8 at 129 K), showing pure diradical.

Subsequently, the EPR tube was attached to the vacuum line. The reaction mixture was diluted by distilled dibutyl phthalate (350  $\mu$ L). The dark blue mixture was mixed at  $-30$   $^{\circ}$ C for 2 h until get homogeneous solution (very difficult to mix because the solvent is viscous), and then evacuated to build up pressure of 0.9 mTorr inside the vessel. EPR spectra of the dark blue-purple solution (total height 6.65 cm, 0.559 mM) were obtained at 240 K and 129 K (label: HZ1015r9 at 240 K; HZ1015r12 at 129 K). The dark blue-purple solution was stored in liquid nitrogen.

Subsequently, EPR spectra at different power levels were obtained at 117 K (label: HZ1015r21-r42) using TEMPONE in dibutyl phthalate as reference (conc.=5.081 mM, label: HZ1015r43-r64) (Figure S5). Magnetic susceptibility was determined at 117 K, using EPR spin counting (label: HZ1015r65-r66, r69-r70, r73-r74, r77-r78, r81-r82, r85-r86) employing TEMPONE in dibutyl phthalate as reference (conc.=5.081 mM, label: HZ1015r67-r68, r71-r72, r75-r76, r79-r80, r83-r84, r87-r88). The dark blue-purple solution was stored in liquid nitrogen.

Subsequently, EPR spectra at variable temperature were obtained at 105 - 295 K (Figure S16, top and bottom panels) (label: HZ1015r93-r94, r97-r98, r101-r102 at 295 K; HZ1015r106-r107, r110-r111, r114-r115 at 279 K; HZ1015r118-r119, r122-r123, r126-r127 at 258 K; HZ1015r130-r131, r134-r135, r138-r139 at 237 K; HZ1015r142-r143, r146-r147, r150-r151 at 216 K; HZ1015r154-r155, r158-r159, r162-r163 at 196 K; HZ1015r178-r179, r182-r183, r186-r187 at 174 K; HZ1015r190-r191, r194-r195, r198-r199 at 152 K; HZ1015r202-r203, r206-r207, r210-r211 at 141 K; HZ1015r214-r215, r218-r219, r222-r223 at 129 K; HZ1015r226-r227, r230-r231, r234-r235 at 117 K; HZ1015r238-r239, r242-r243, r246-r247 at 105 K) using TEMPONE in dibutyl phthalate as reference (conc.=5.081 mM, label: HZ1015r95-r96, r99-r100, r103-r104 at 295 K; HZ1015r108-r109, r112-r113, r116-r117 at 279 K; HZ1015r120-r121, r124-r125, r128-r129 at 258 K; HZ1015r132-r133, r136-r137, r140-r141 at 237 K; HZ1015r144-r145, r148-r149, r152-r153 at 216 K; HZ1015r156-r157, r160-r161, r164-r165 at 196 K;

HZ1015r180-r181, r184-r185, r188-r189 at 174 K; HZ1015r192-r193, r196-r197, r200-r201 at 152 K; HZ1015r204-r205, r208-r209, r212-r213 at 141 K; HZ1015r216-r217, r220-r221, r224-r225 at 129 K; HZ1015r228-r229, r232-r233, r236-r237 at 117 K; HZ1015r240-r241, r244-r245, r248-r249 at 105 K). The dark blue-purple solution was stored in liquid nitrogen. Subsequently, the sample of was consecutively annealed at 340 K for 0, 10, 30, 60, 120 min (total time). The EPR was taken at 295 K after each annealing (label: HZ1015r265, r267, r269, r271, r273) using TEMPONE in dibutyl phthalate as reference (conc.=5.081 mM, label: HZ1015r266, r268, r270, r272, r274) (Figure S17). The dark blue-purple solution was stored in liquid nitrogen. Subsequently, EPR spectra at higher temperature were obtained, 295 K to 340 K (label: HZ1015r275-r276, r279-r280, r283-r284 at 295 K; HZ1015r287-r288, r291-r292, r295-r296 at 305 K; HZ1015r299-r300, r303-r304, r307-r308 at 320 K; HZ1015r311-r312 at 340 K) using TEMPONE in dibutyl phthalate as reference (conc.=5.081 mM, label: HZ1015r277-r278, r281-r282, r285-r286 at 295 K; HZ1015r289-r290, r293-r294, r297-r298 at 305 K; HZ1015r301-r302, r305-r306, r309-r310 at 320 K). The dark blue-purple solution was stored in liquid nitrogen.

Subsequently, the dark blue solution was transferred to customized Schlenk vessel with UV-vis-NIR cuvette (2-mm path-length) under argon flow. UV-vis-NIR spectra were obtained (label: HZ1015UV7, HZ1015UV8, HZ1015UV9, HZ1015UV10, HZ1015UV11). Then the dark blue-purple solution was transferred back to a clean customized Schlenk vessel with 4-mm EPR tube. EPR spectra were obtained at 129 K (label: HZ1015r330-r331, r334-r335, r338-r339, r342-r343, r346-r347) using TEMPONE in dibutyl phthalate as reference (conc. = 5.081 mM, label: HZ1015332-r333, r336-r337, r340-r341, r344-r345, r348-r349) (Fig. S18).

Finally, the EPR tube was attached to the vacuum line, the reaction was quenched by addition of bis(pentamethylcyclopentadienyl)iron(II) in DCM (0.92 mg, 10 eq). The color changed from dark blue-purple to yellow. The solution was transferred to a vial and evaporated by N<sub>2</sub> to give HZ1015crude, which was purified by column chromatography (regular silica gel, pentane/DCM, 5:1) without light to get a yellow powder (0.24 mg (96%), HZ1015COL). <sup>1</sup>H NMR spectrum (400 MHz, acetone-*d*<sub>6</sub>, label: HZ1015COL-400) and ESI-MS (0.1% of trifluoroacetic acid in dichloromethane, label: HZ1015COL) data of the sample showed the starting material **1-D**<sub>2</sub> (Figs. S19 and S20).



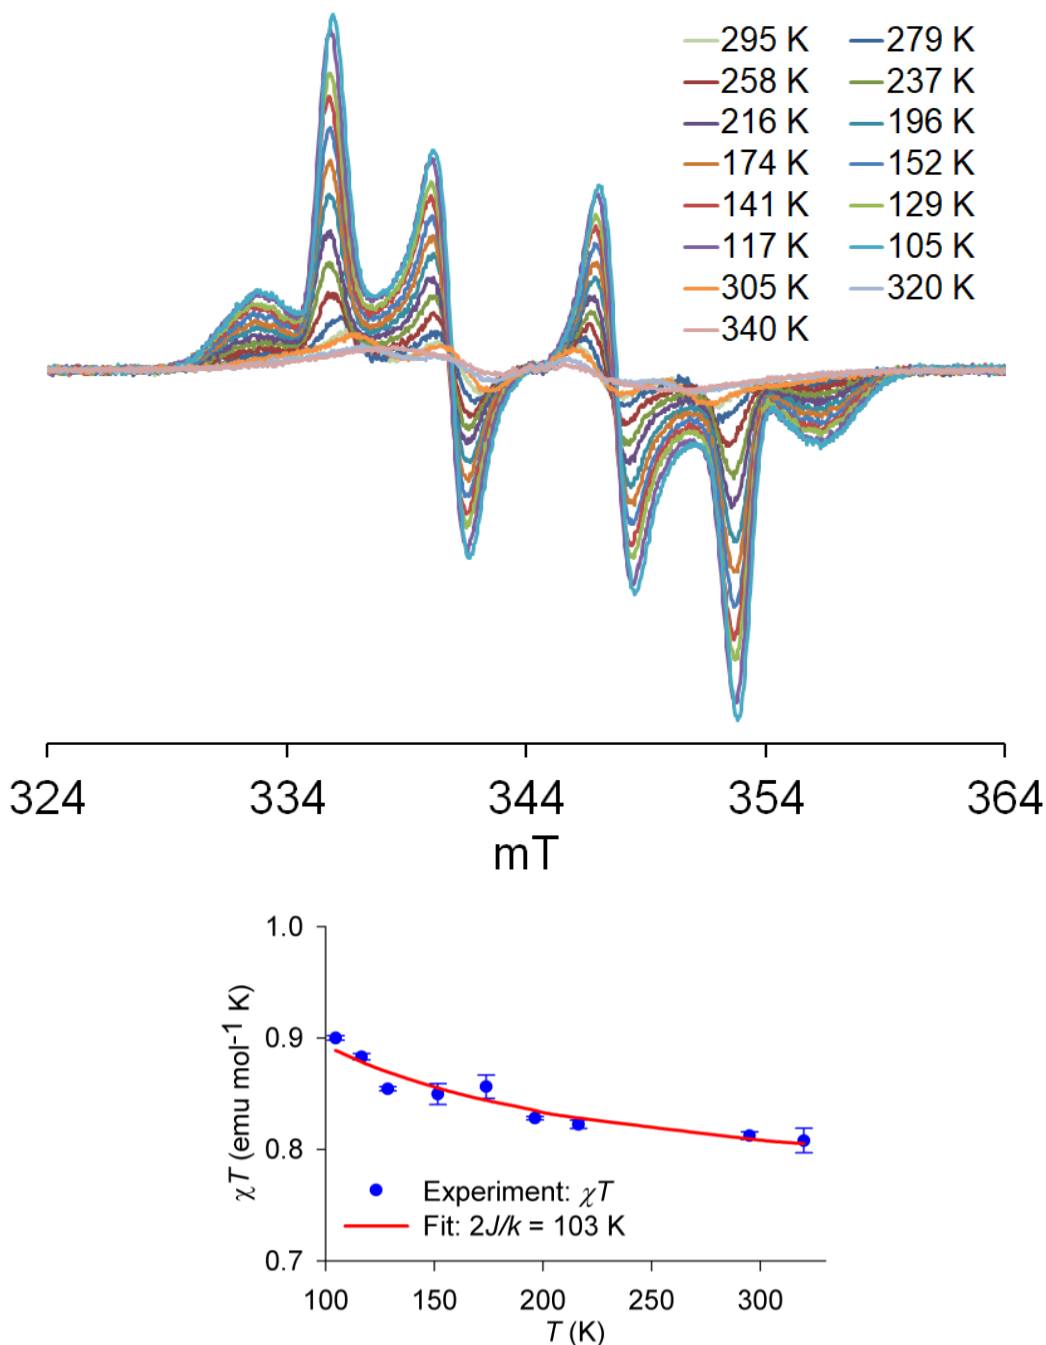

**Fig. S16.** Top panel: EPR spectra of 0.56 mM diradical dication  $\mathbf{1}^{2,2+} 2\text{SbF}_6^-$  (sample label: HZ1015) in DBP in the 105 – 340 K temperature range (EPR labels: HZ1015r93, r106, r118, r130, r142, r154, r178, r190, r202, r214, r226, r238, r287, r299, r311). Bottom panel: repeat quantitative EPR spectroscopy of diradical dication  $\mathbf{1}^{2,2+} 2\text{SbF}_6^-$  in DBP (sample label: HZ1015) with TEMPONE in DBP as a reference: experimental values of  $\chi T$  (mean  $\pm$  SE), the product of paramagnetic susceptibility ( $\chi$ ) and  $T$  in the  $T = 105 - 320$  K range and numerical two-parameter fit with the variable parameters,  $2J/k = 103 \pm 21$  K and  $N = 0.8403 \pm 0.017$  (mean  $\pm$  SE), and parameter dependence of 0.963. After scaling  $\chi T$  with  $N = 0.8403$ , one-parameter fit gave  $2J/k = 103 \pm 4$  K.

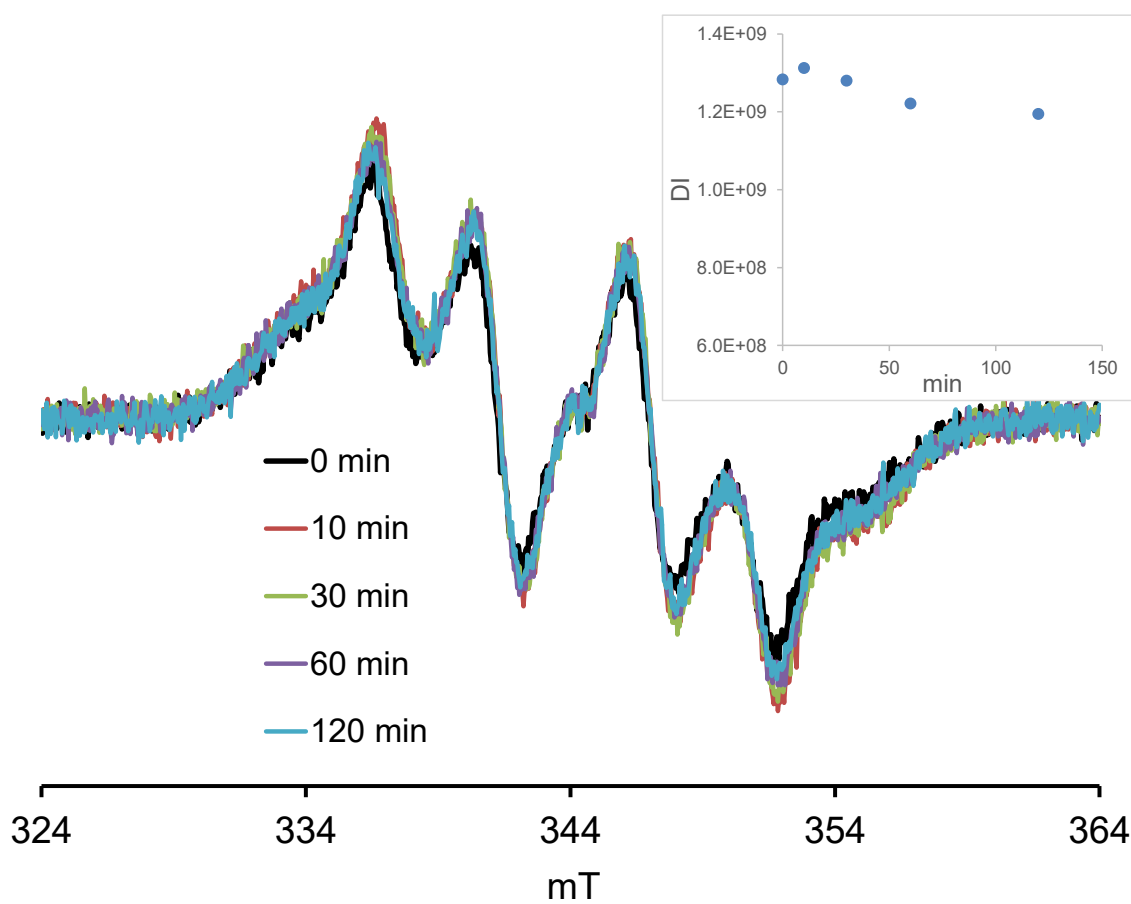

**Fig. S17.** EPR spectra of 0.56 mM diradical dication  $1^{2+} 2SbF_6^{-}$  (sample label: HZ1015) in DBP at 295 K, including Tempone reference, following annealing at 340 K for 10 – 120 min (total time); EPR labels: HZ1015r265, r267, r269, r271, and r273. Inset plot shows dependence of double integrated spectral intensity vs time (at 340 K).

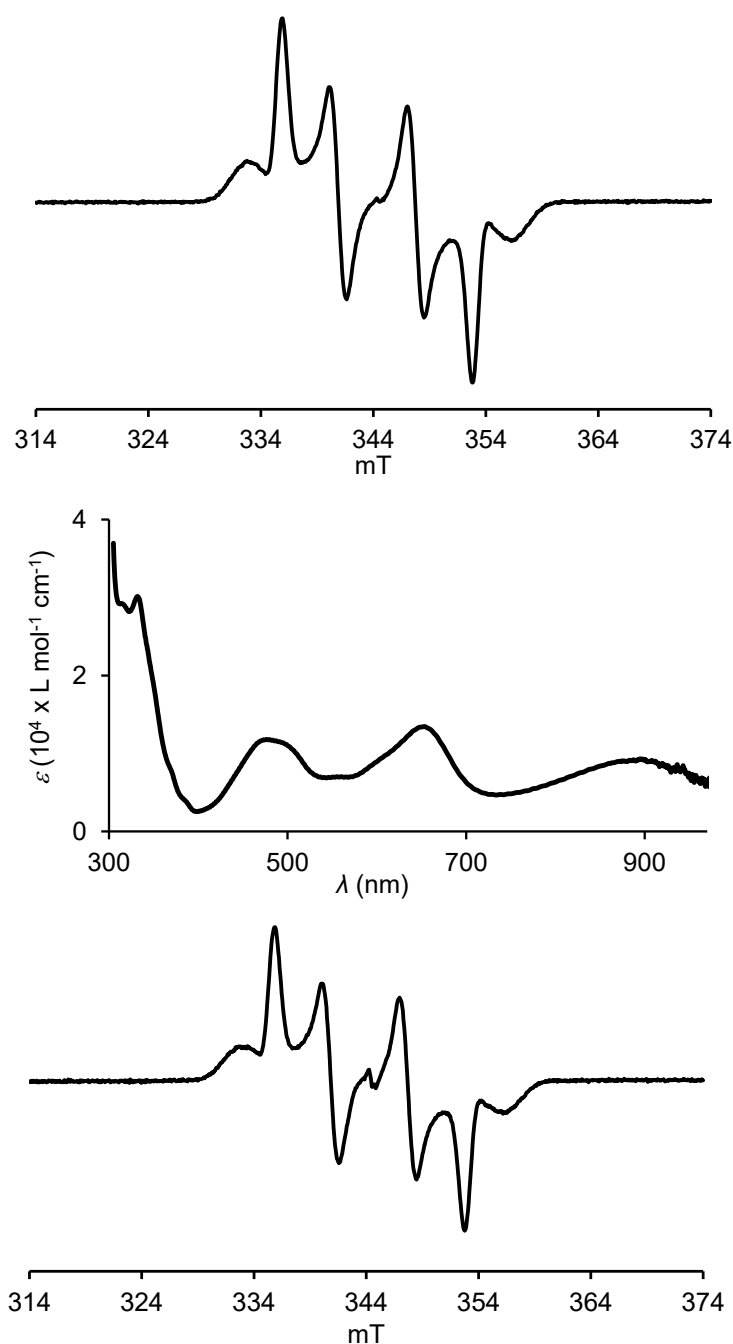

**Fig. S18.** EPR (X-band) and UV-vis-NIR spectra of diradical dication  $\mathbf{1}^{2\cdot 2+} 2\text{SbF}_6^-$  (sample label: HZ1015) obtained during oxidation of  $\mathbf{1-D}_2$  with  $[\text{NO}]^+[\text{SbF}_6]^-$  in dibutyl phthalate (DBP). Top panel: EPR spectrum of 0.56 mM  $\mathbf{1}^{2\cdot 2+} 2\text{SbF}_6^-$  in DBP at 117 K prior to UV-vis-NIR spectrum (EPR label: HZ1015r264). Middle panel: UV-vis-NIR spectrum of 0.56 mM  $\mathbf{1}^{2\cdot 2+} 2\text{SbF}_6^-$  in DBP at room temperature (UV-vis-NIR label: HZ1015uv7-uv11): bands at  $\lambda_{\text{max}} = 332, 477, 653,$  and  $929$  nm have the following extinction coefficients:  $\epsilon_{332} = 3.0 \times 10^4$ ,  $\epsilon_{477} = 1.2 \times 10^4$ ,  $\epsilon_{653} = 1.3 \times 10^4$ , and  $\epsilon_{929} = 8.3 \times 10^3$   $\text{L mol}^{-1} \text{cm}^{-1}$ . Bottom panel: EPR spectrum of 0.56 mM  $\mathbf{1}^{2\cdot 2+} 2\text{SbF}_6^-$  in DBP at 129 K following the UV-vis-NIR spectrum (EPR label: HZ1015r329).

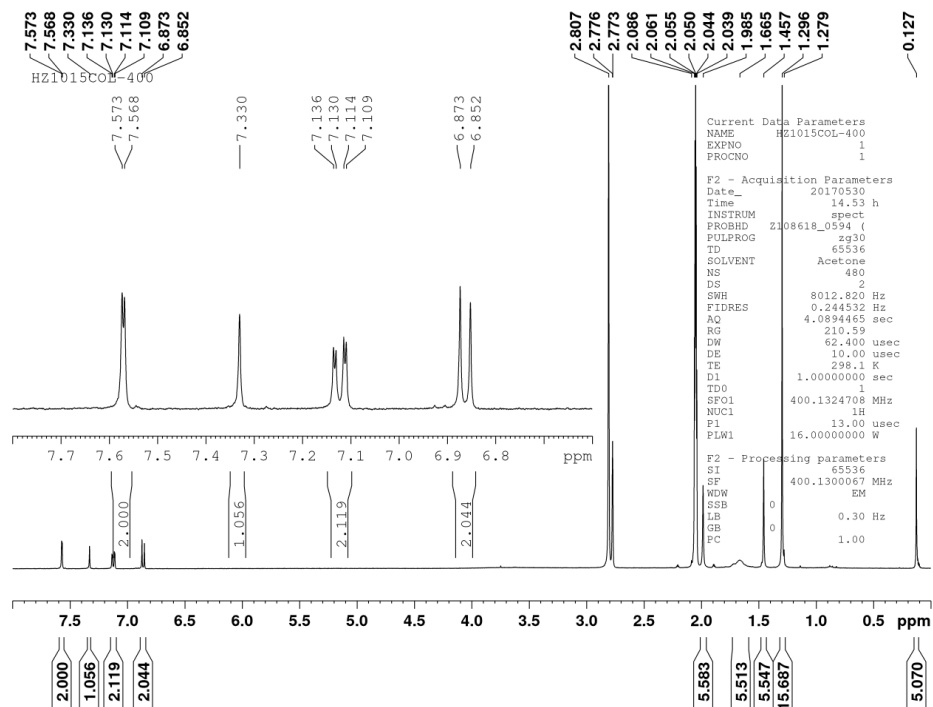

**Fig. S19.**  $^1\text{H}$  NMR spectrum (400 MHz, acetone- $d_6$ , label: HZ1015COL-400) of the sample obtained after quench of diradical dication  $1^{2+2+} 2\text{SbF}_6^-$  in DBP, using  $\text{Cp}^*_2\text{Fe}$ , and purification. The spectrum is identical to that of starting material  $1\text{-D}_2$ .

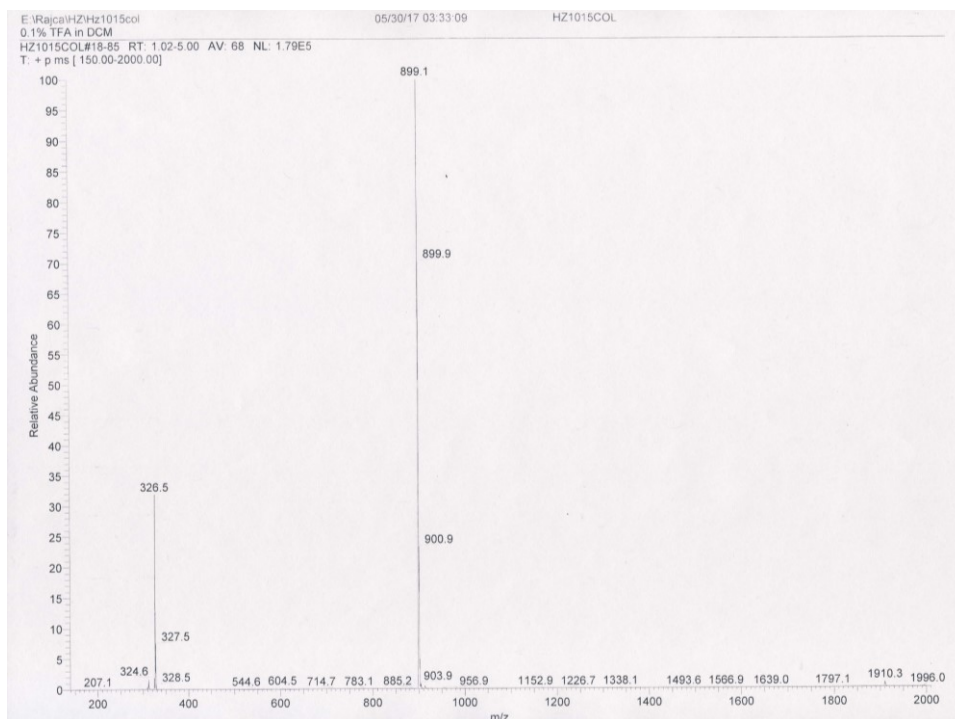

**Fig. S20.** LRMS spectrum (0.1% TFA in DCM, label: HZ1015COL) of the sample obtained after quench of diradical dication  $1^{2+2+} 2\text{SbF}_6^-$  in DBP and purification. The spectrum is consistent with the starting material  $1\text{-D}_2$ .

**Diradical dication  $1^{2\cdot 2+} 2\text{SbF}_6^-$  generated using  $[\text{NO}]^+[\text{SbF}_6]^-$  in DBP/DCM/MeCN: sample label, HZ1001.** To the starting material **1-D<sub>2</sub>** (0.29 mg, 0.32  $\mu\text{mol}$ , PB4\_68B-tl) in a custom-made Schlenk vessel with 4-mm EPR tube,<sup>S2</sup> evacuated on vacuum line at room temperature overnight, anhydrous dichloromethane ( $\sim 10 \mu\text{L}$ ) was added by vacuum transfer to get a yellow solution. Subsequently, the solution was cooled to  $-40 \text{ }^\circ\text{C}$  by ethanol-liquid nitrogen bath, and the oxidant  $\text{NOSbF}_6$  in anhydrous  $\text{CH}_3\text{CN}$  (24  $\mu\text{L}$ , 2.2 eq, 4.7 mg/0.6 mL) was added under flow of argon. The reaction mixture was mixed with stir bar at  $-40 \text{ }^\circ\text{C}$  and degassed until vacuum build up in the vessel; the color of the reaction mixture changed from yellow to dark-purple blue. EPR spectra were obtained at 230 K and 129 K (label: HZ1001r1-r6 at 230 K, r8-r9 at 129 K) using TEMPONE in DCM as reference (conc.=1.2043 mM, label: HZ1001r11-r12 at 129 K); the spectra showed the presence of monoradical only. The spin concentration determined at 129 K was about 65%. The dark blue-purple solution was stored in liquid nitrogen.

Subsequently, the EPR tube was attached to the vacuum line, more  $\text{NOSbF}_6$  in  $\text{CH}_3\text{CN}$  (22  $\mu\text{L}$ , 2 eq) and distilled dibutyl phthalate (140  $\mu\text{L}$ ) were added under argon flow, the solution was mixed with stir bar at  $-30 \text{ }^\circ\text{C}$  and degassed until vacuum build up in the vessel. EPR spectra at different power levels were obtained at 129 K (label: HZ1001r16-r23, r30-r33) using TEMPONE in DCM as reference (conc.=1.2043 mM, label: HZ1001r24-r29). The samples possessed spin concentration of about 120 – 130% and the spectra showed presence of triplet diradical with an significant admixture of  $S = \frac{1}{2}$  monoradical. The dark blue solution was stored in liquid nitrogen.

Subsequently, the EPR tube was attached to the vacuum line, the reaction mixture was diluted by distilled dibutyl phthalate (250  $\mu\text{L}$ ). The dark blue mixture was mixed at  $-30 \text{ }^\circ\text{C}$  until homogeneous solution was obtained, and then evacuated well until vacuum build up in the vessel. EPR spectra at 240 K were obtained (label: HZ1001r34-r35). EPR spectra at different power levels were obtained at 129 K (label: HZ1001r38-r43) using TEMPONE in dibutyl phthalate as reference (conc.=1.557 mM, label: HZ1001r44-r49). The spectra showed somewhat decreased amount of monoradical and increased spin concentration of about 150 – 160%. The dark blue solution was stored in liquid nitrogen.

Subsequently, the EPR tube was attached to the vacuum line, third portion of  $\text{NOSbF}_6$  in  $\text{CH}_3\text{CN}$  (44  $\mu\text{L}$ , 4 eq) was added under argon flow, the solution was mixed with stir bar at  $-30 \text{ }^\circ\text{C}$  and degassed

well until vacuum build up in the vessel (total height 7.0 cm, 0.6104 mM). EPR spectra at 240 K were obtained (label: HZ1001r51-r52). EPR spectra at different power levels were obtained at 129 K (label: HZ1001r55-r60) using TEMPONE in dibutyl phthalate as reference (conc.=1.557 mM, label: HZ1001r61-r66) (Figure S21); spin concentration is more than 200%. The dark blue-purple solution was stored in liquid nitrogen. Subsequently, EPR spectra with high S/N at 112 and 117 K (HZ1001r67-r72) were obtained (Fig. S21).

Attempts to obtain quantitative EPR data at variable temperatures (105 K to 300 K) failed: (label: HZ1001r73-r74, r77-r78, r81-r82 at 105 K; HZ1001r85-r86, r89-r90, r93-r94 at 112 K; HZ1001r97-r98, r101-r102, r105-r106 at 117 K; HZ1001r109-r110, r113-r114, r117-r118 at 123 K; HZ1001r121-r122, r125-r126, r129-r130 at 129 K; HZ1001r133-r134, r137-r138, r141-r142 at 141 K; HZ1001r145-r146, r149-r150, r153-r154 at 159 K; HZ1001r157-r158, r161-r162, r165-r166 at 174 K; HZ1001r169-r170, r173-r174, r177-r178 at 196 K; HZ1001r181-r182, r185-r186, r189-r190 at 227 K; HZ1001r205-r207, r210-r211, r214-r215 at 258 K; HZ1001r218-r219 at 300 K) using TEMPONE in dibutyl phthalate as reference (conc.=1.5567 mM, label: HZ1001r75-r76, r79-r80, r83-r84 at 105 K; HZ1001r87-r88, r91-r92, r95-r96 at 112 K; HZ1001r99-r100, r103-r104, r107-r108 at 117 K; HZ1001r111-r112, r115-r116, r119-r120 at 123 K; HZ1001r123-r124, r127-r128, r131-r132 at 129 K; HZ1001r135-r136, r139-r140, r143-r144 at 141 K; HZ1001r147-r148, r151-r152, r155-r156 at 159 K; HZ1001r159-r160, r163-r164, r167-r168 at 174 K; HZ1001r171-r172, r175-r176, r179-r180 at 196 K; HZ1001r183-r184, r187-r188, r191-r192 at 227 K; HZ1001r208-r209, r212-r213, r216-r217 at 258 K; HZ1001r220-r221 at 300 K). The data were not useful because of drop-off in Q-values at higher temperatures for the sample of diradical dication, caused most likely by residual DCM/MeCN present in DBP; e.g., while at  $T < 160$  K, Q-values for the sample and for Tempone reference (in pure DBP) were about the same ( $Q = 3200 \pm 100$  in a double mode cavity), at  $T = 227$  K,  $Q = 1400$  and  $3100$  were measured for the sample and for the reference. Consequently,  $\chi T$  values at near 300 K were by a factor of 3 – 4 smaller than those at near 100 K, i.e., the excessive drop-off at higher temperatures was an artefact due to the Q-values. The dark blue-purple solution was stored in liquid nitrogen.

Finally, the EPR tube was attached to the vacuum line, the reaction was quenched by addition of bis(pentamethylcyclopentadienyl)iron(II) in DCM (1.78 mg, 17 eq). The color changed from dark blue-purple to yellow. The solution was transferred to a vial and evaporated by N<sub>2</sub> gas to give HZ1001crude, which was purified by column chromatography (regular silica gel, pentane/DCM, 5:1) with exclusion of light, to obtain a yellow powder (0.24 mg, HZ1001COL). <sup>1</sup>H NMR spectrum (400 MHz, acetone-*d*<sub>6</sub>, label: HZ1001COL-400) and ESI-MS (0.1% of trifluoroacetic acid in dichloromethane, label: HZ1001COL) data of the sample showed the starting material **1-D<sub>2</sub>** (Figs. S22 and S23).

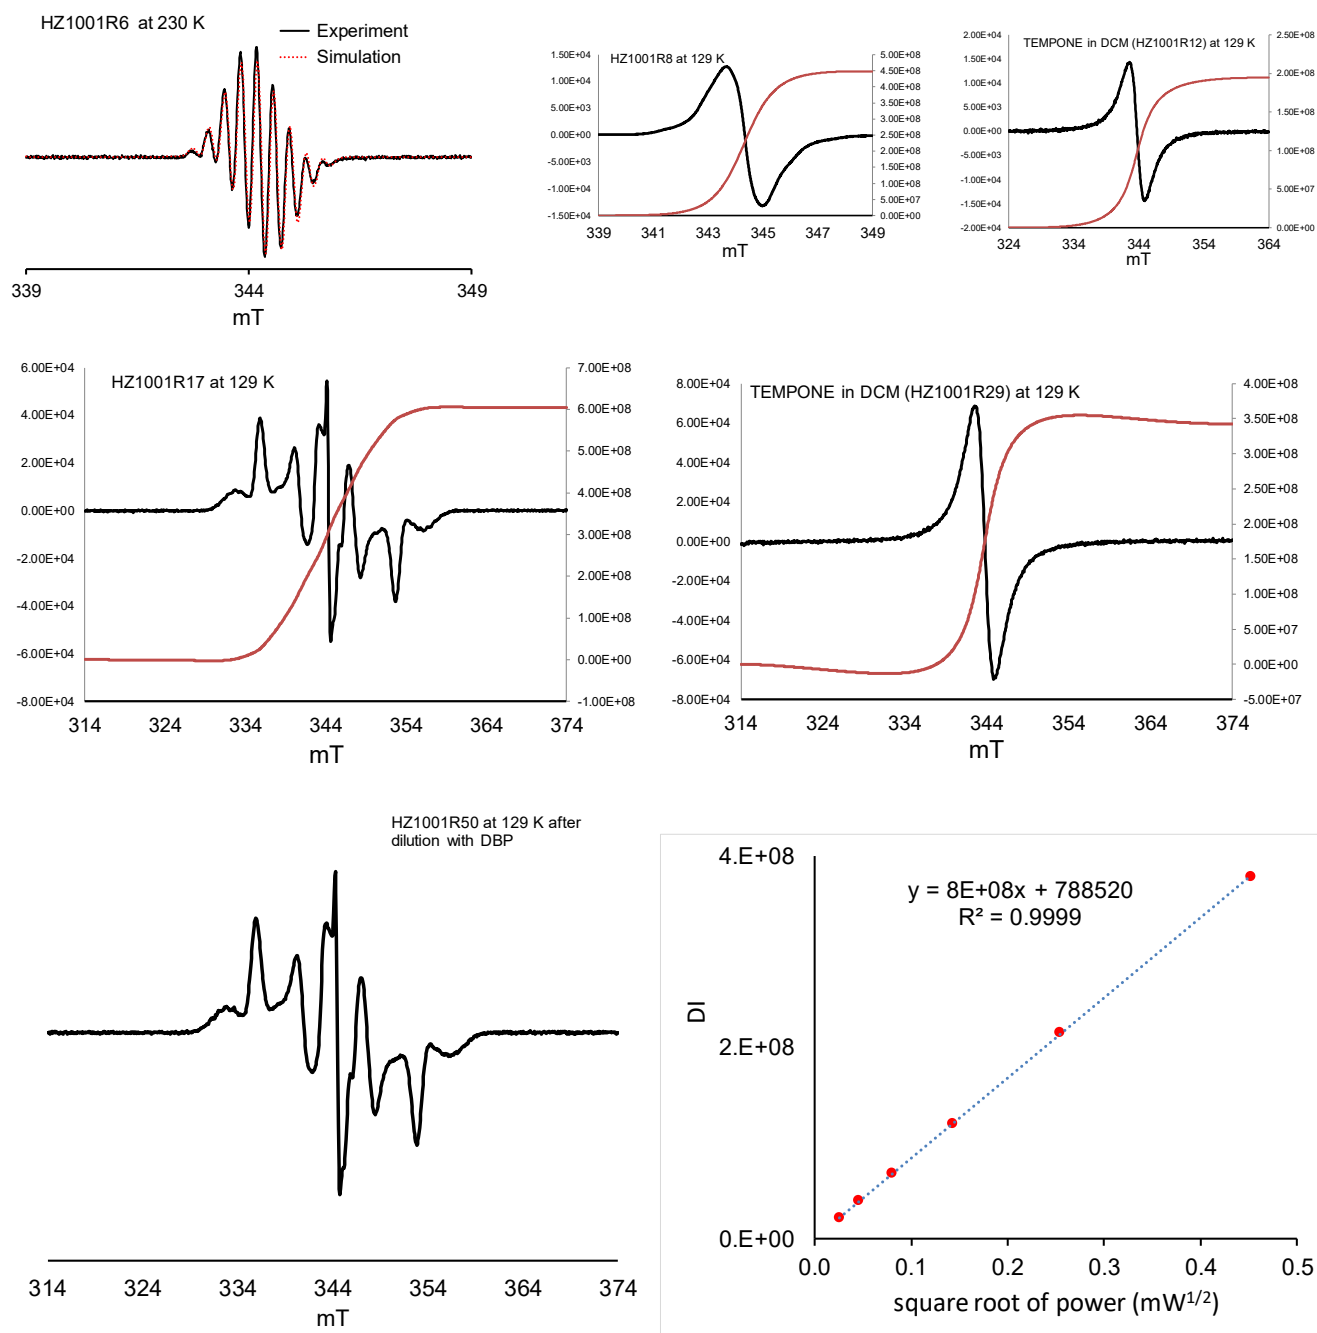

**Fig. S21.** EPR spectroscopic follow up of oxidation of **1-D<sub>2</sub>** in DCM/MeCN/DBP. Top panel: EPR spectra in DCM/MeCN at 230 and 129 K after initial addition of  $\text{NOSbF}_6$  (2.2 equiv) in MeCN; spin concentration at 129 K is 65%; ; simulation (Garlic, EasySpin, rmsd = 1.110) for spectrum at 230 K:  $A(^{14}\text{N}) = 10.02$  MHz,  $g = 2.0029$ , line-width = 0.216 mT (Gaussian) and 0.038 mT (Lorentzian). Middle panel: the spectra in DCM/MeCN/DBP at 129 K after the second addition of  $\text{NOSbF}_6$  (2 equiv) in MeCN; spin concentration at 129 K is 120 – 130 %. Bottom panel: the spectra DCM/MeCN/DBP at 129 K after dilution with DBP: spin concentration at 129 K is 150 – 160 %, the plot of EPR double integrated signal intensity (DI) versus the square root of microwave power (MW attn. 30 – 55 dB) in DBP/DCM/MeCN at 129 K for samples after dilution with DBP. **Fig. S21 is continued on the next page.**



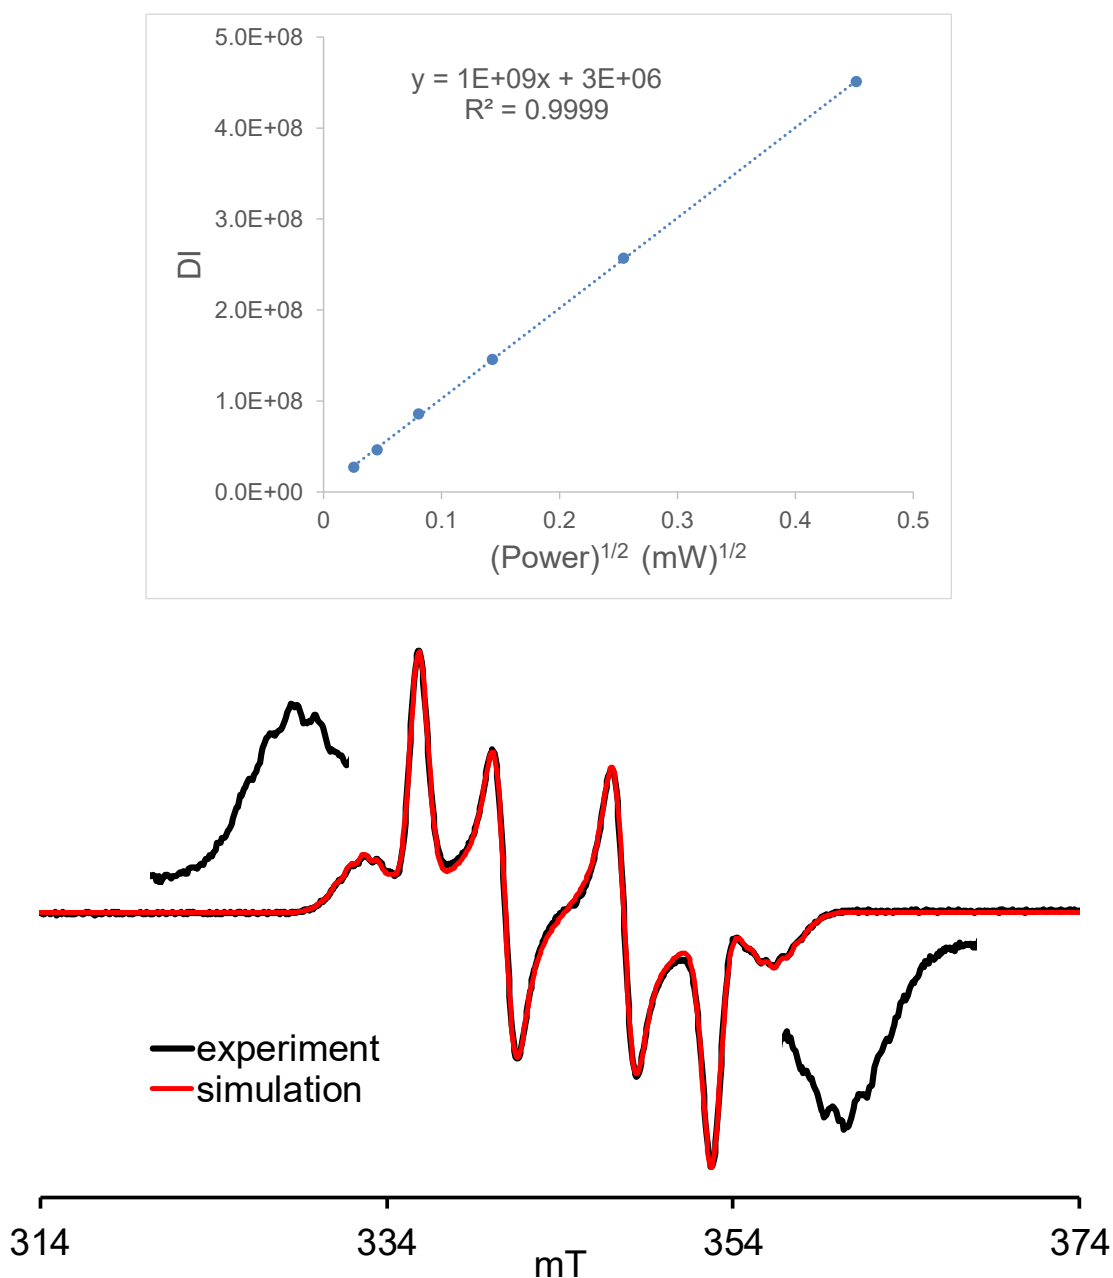

**Fig. S21 (contd.).** EPR spectra at following 3<sup>rd</sup> addition of  $\text{NOSbF}_6$  (2.2 equiv) in MeCN; spin concentration is 200+%. Top panel: plot of EPR double integrated signal intensity (DI) versus the square root of microwave power in DBP/DCM/MeCN at 129 K. Microwave power attenuation ranges for 0.61 mM diradical dication (sample label: HZ1001), 30 – 55 dB (EPR labels: HZ1001r55-r60). Bottom panel: EPR ( $\nu = 9.6532$  GHz, 64 scans, EPR label: HZ1001r67, sample label: HZ1001) spectrum (insets: expansions of the z-lines) with simulation, obtained during oxidation of  $1\text{-D}_2$  with  $[\text{NO}]^+[\text{SbF}_6]^-$  in DBP/DCM/MeCN showing 0.61 mM diradical dication  $1^{2\cdot 2+} 2\text{SbF}_6^-$  at 112 K. Spectral simulation, obtained using EasySpin, of the  $|\Delta m_s| = 1$  region:  $|D/hc| = 1.107 \times 10^{-2} \text{ cm}^{-1}$ ,  $|E/hc| = 1.566 \times 10^{-3} \text{ cm}^{-1}$ ,  $|A_{zz}/hc|/2 = 7.3 \times 10^{-4} \text{ cm}^{-1}$ ,  $g_{xx} = 2.0030$ ,  $g_{yy} = 2.0030$ ,  $g_{zz} = 2.0019$ ; line width,  $\text{lwpp} = 0.585$  mT;  $H$ -strain (MHz):  $H_x = 31.01$ ,  $H_y = 28.19$ ,  $H_z = 11.78$ .

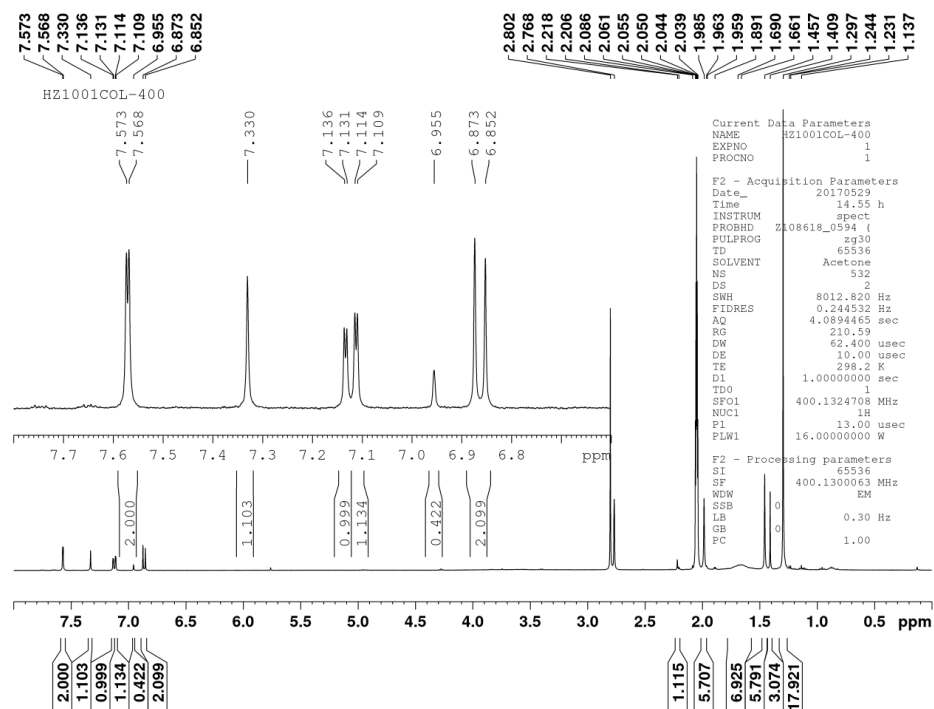

**Fig. S22.**  $^1\text{H}$  NMR spectrum (400 MHz, acetone- $d_6$ , label: HZ1001COL-400) of the sample obtained after quench of diradical dication  $\mathbf{1}^{2+2+} 2\text{SbF}_6^-$  in DBP, using  $\text{Cp}^*_2\text{Fe}$ , and purification. The spectrum is identical to that of starting material  $\mathbf{1-D}_2$ .

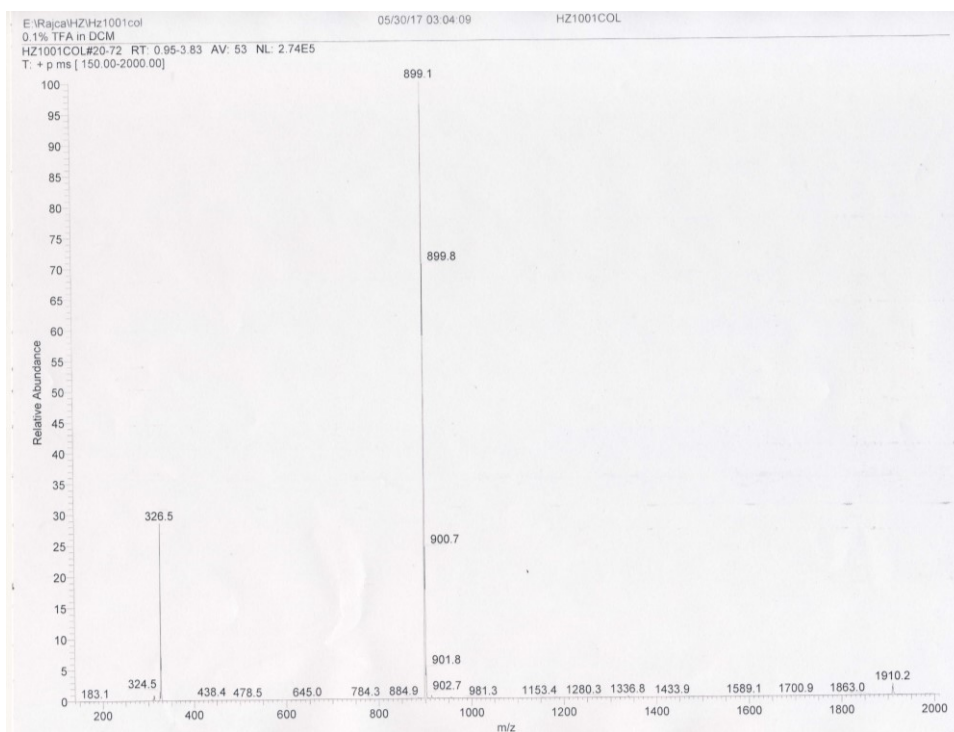

**Fig. S23.** LRMS spectrum (0.1% TFA in DCM, label: HZ1001COL) of the sample obtained after quench of diradical dication  $\mathbf{1}^{2+2+} 2\text{SbF}_6^-$  in DBP and purification. The spectrum is consistent with the starting material  $\mathbf{1-D}_2$ .

**Diradical dication  $1^{2\cdot 2+} 2\text{SbF}_6^-$  generated using  $[\text{NO}]^+[\text{SbF}_6]^-$  in DBP: sample label, CS332.**

To the starting material  $1\text{-D}_2$  (0.47 mg, 0.523  $\mu\text{mol}$ , sample label: CS-3-2-25p) in a custom-made Schlenk vessel with 4-mm EPR tube,<sup>S2</sup> evacuated on vacuum line at room temperature for several days, distilled dibutyl phthalate (DBP,  $\sim 100 \mu\text{L}$ ) was added under argon flow to get a yellow solution. Subsequently, the solution was cooled to  $-30^\circ\text{C}$  by ethanol-liquid nitrogen bath, and the oxidant  $\text{NO}\text{SbF}_6$  in distilled DBP (125  $\mu\text{L}$ , 5.6 equiv, 11.8 mg/1.897 mL) was added under flow of argon. The reaction mixture was mixed with stir bar at  $-30^\circ\text{C}$  and evacuated 2 hours until vacuum build up inside the vessel (pressure = 1.6 mTorr). During this process the color of the reaction mixture changed from yellow to dark blue. EPR spectra was obtained at 240 K (label:CS332R1). Subsequently, the EPR tube was attached to the vacuum line. The reaction mixture was diluted by distilled dibutyl phthalate ( $\sim 200 \mu\text{L}$ ). The dark blue mixture was mixed at  $-30^\circ\text{C}$  for 40 mins until get homogeneous solution (very difficult to mix because the solvent is viscous), and then evacuated to build up pressure of 1.6 mTorr inside the vessel. EPR spectra was obtained at 240 K (label: CS322R2). Then the dark blue mixture was mixed at RT for another 1 hour and EPR spectra was obtain at 240 K (label: CS322R3). The dark blue solution was stored in liquid nitrogen. Prior to air-stability measurements, EPR spectrum of 1.10 mM diradical dication was obtained at 105 K (Fig. S24).

Air-stability. Magnetic susceptibility,  $\chi T$ , was measured at 117 K by alternating measurements for the sample and for the reference (1.17 mM tempone in DBP) three times. Subsequently, the EPR sample tube was warmed up to room temperature and the tube was open to air for specified period of time (30 min – 12 h, with total time on air equal to 48 h). The solution of diradical dication was mixed with a stirbar, while the tube was open to air. Then, the tube was connected to a vacuum line and the solution was pumped for ca. 5 min, until attaining pressure of ca. 2 mTorr. Magnetic susceptibility was measured at 117 K as described above. This process was repeated for more than a dozen times (Fig. S25). The sample and reference tubes were stored in liquid nitrogen after every measurement.

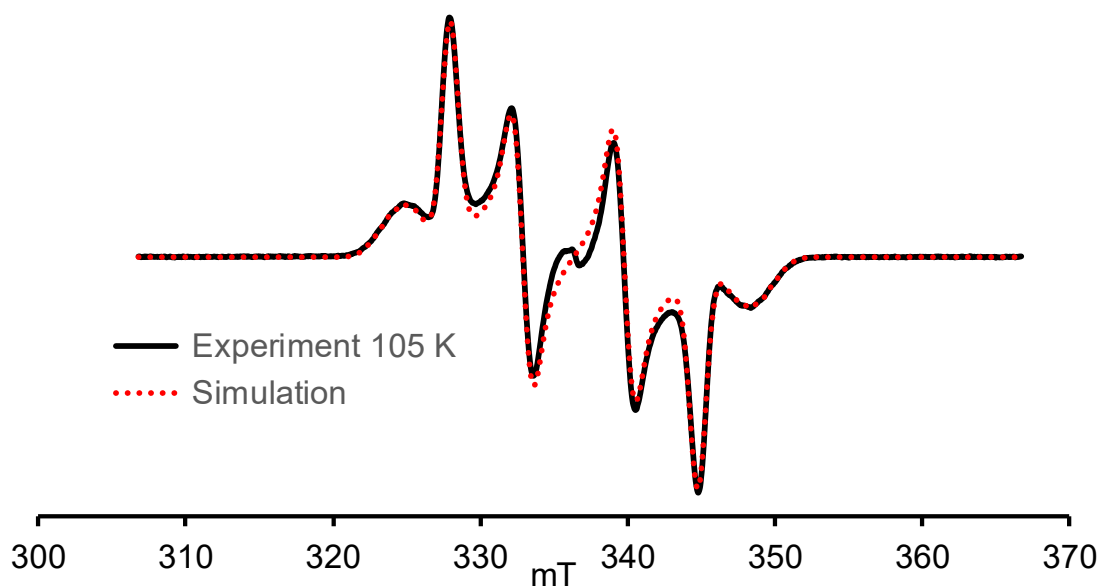

**Fig. S24.** EPR ( $\nu = 9.4353$  GHz, EPR label: CS349R1, sample label: CS332) spectrum of 1.10 mM diradical cation  $\mathbf{1}^{2.2+} 2\text{SbF}_6^-$  in DBP at 105 K (inset: the  $|\Delta m_s| = 2$  transition) with simulation, prior to air stability measurements, obtained during oxidation of  $\mathbf{1-D}_2$  with  $[\text{NO}]^+[\text{SbF}_6]^-$ . EPR spin counting at  $T = 105$  K (vs. Tempone in DBP) showed  $\chi T \approx 0.90$  emu mol $^{-1}$  K. Spectral simulation, obtained using EasySpin, of the  $|\Delta m_s| = 1$  region:  $|D/hc| = 1.107 \times 10^{-2}$  cm $^{-1}$ ,  $|E/hc| = 1.556 \times 10^{-3}$  cm $^{-1}$ ,  $|A_{zz}/hc|/2 = 7.4 \times 10^{-4}$  cm $^{-1}$ ,  $g_{xx} = 2.0039$ ,  $g_{yy} = 2.0039$ ,  $g_{zz} = 2.0029$ ;  $H$ -strain (MHz):  $H_x = 39.58$ ,  $H_y = 36.53$ ,  $H_z = 21.78$ .

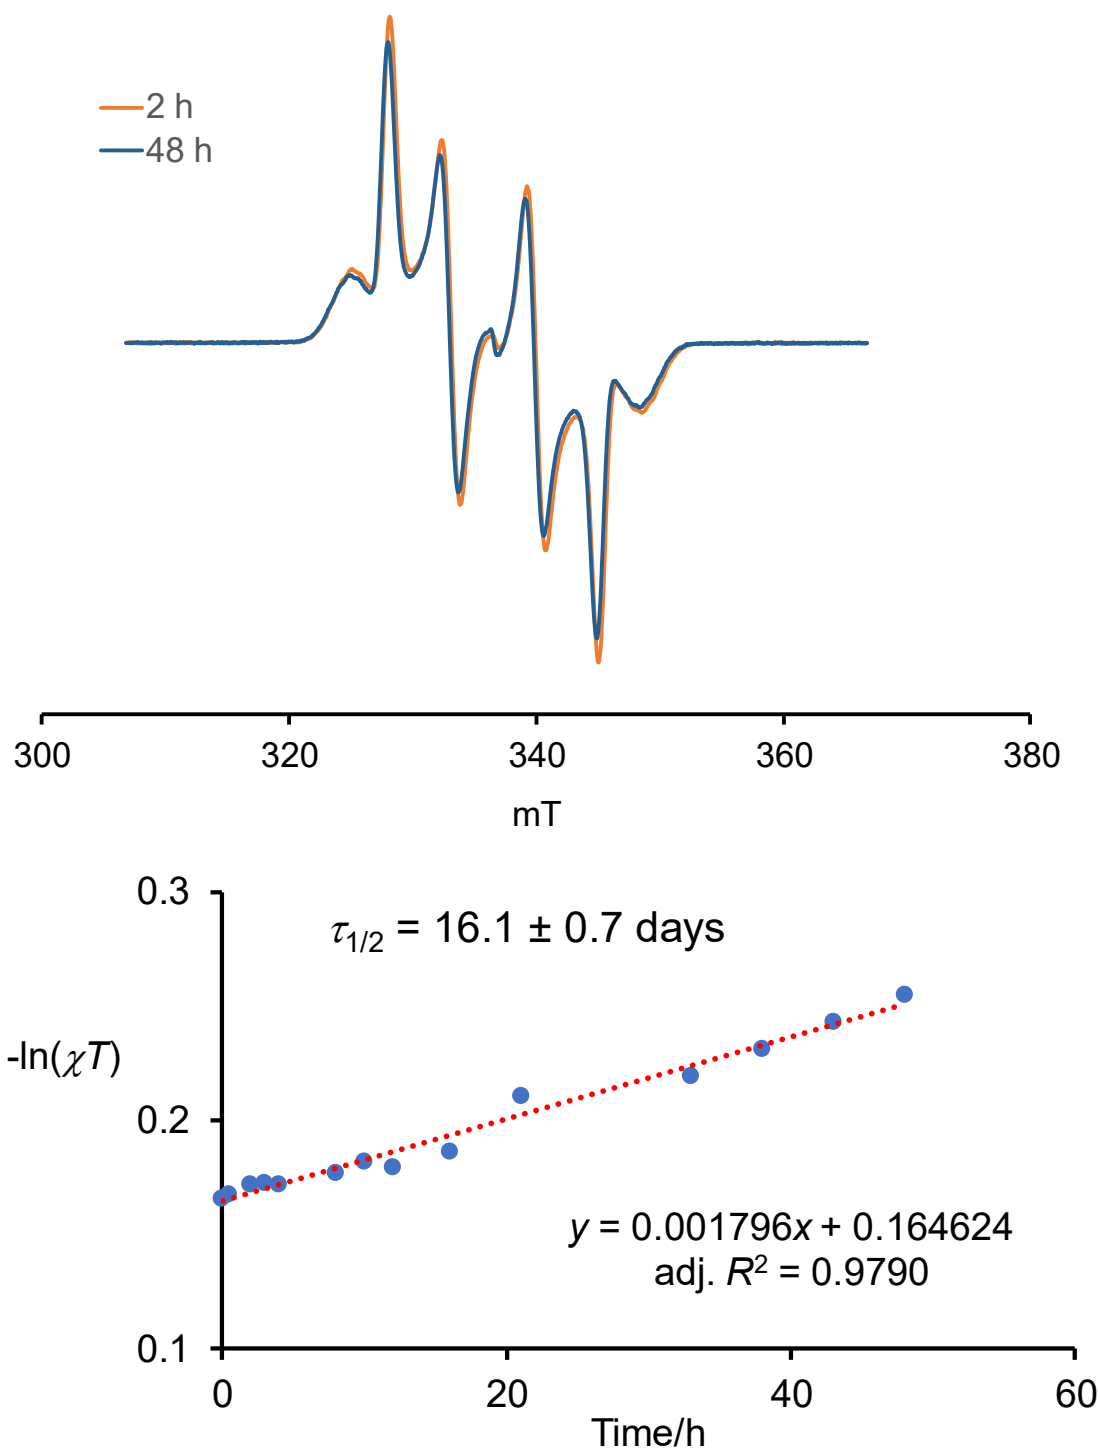

**Fig. S25.** Determination of half-life for diradical dication  $1^{2+} 2\text{SbF}_6^-$  in DBP at ambient conditions by quantitative EPR spectroscopy (sample label: CS332). Top plot: examples of EPR spectra at 117 K after exposure of diradical dication to air at room temperature for 2 h and 48 h. Bottom plot: quantitative EPR spectroscopy of 1.10 mM diradical dication  $1^{2+} 2\text{SbF}_6^-$  in DBP: plot of  $\ln(\chi T)$  versus time (0 – 48 h), where time corresponds to exposure to ambient conditions and values of  $\chi T$  are measured at 117 K; first-order rate constant was  $k = 0.001696 \pm 0.0000729 \text{ h}^{-1}$  (mean  $\pm$  SE).

**Diradical dication  $1^{2\cdot 2+} 2\text{SbF}_6^-$  generated using  $[\text{NO}]^+[\text{SbF}_6]^-$  in DBP: sample label, CS374.**

To the starting material **1-D<sub>2</sub>** (0.31 mg, 0.35  $\mu\text{mol}$ , cs-3-2-25p) in custom-made Schlenk vessel with 4-mm EPR tube,<sup>S2</sup> evacuated on vacuum line at room temperature for several days, distilled dibutyl phthalate (DBP,  $\sim 100 \mu\text{L}$ ) was added under argon flow to get a yellow solution. Subsequently, the solution was cooled to  $-30^\circ\text{C}$  by ethanol-liquid nitrogen bath, and the oxidant  $\text{NOSbF}_6$  in distilled DBP ( $75 \mu\text{L}$ , 5.5 equiv, 6.819 mg/mL) was added under flow of argon. The reaction mixture was mixed with stir bar at  $-30^\circ\text{C}$  and evacuated until vacuum build up inside the vessel (pressure = 1.9 mTorr). During this process the color of the reaction mixture changed from yellow to green and finally dark blue-purple. EPR spectra were obtained at 240 K (label:CS374R1). Subsequently, the EPR tube was attached to the vacuum line. The reaction mixture was diluted by distilled dibutyl phthalate ( $\sim 300 \mu\text{L}$ ). The dark blue mixture was mixed at  $-30^\circ\text{C}$  for 1 h until get homogeneous solution (very difficult to mix because the solvent is viscous), and then evacuated to build up pressure of 1.9 mTorr inside the vessel. EPR spectra of the dark blue-purple solution (total height 8.80 cm, 0.84 mM) were obtained at 240 K (label:CS374R2). The dark blue solution was stored in liquid nitrogen.

Subsequently, EPR spectra at variable temperature were obtained (120 K to 200 K) to calculate experimental  $\chi T$ . TEMPONE in dibutyl phthalate as reference (conc.=1.17 mM).

Finally, the EPR tube was attached to the vacuum line. The sample was quenched by addition of bis(pentamethylcyclopentadienyl)iron(II) ( $\text{Cp}^*\text{Fe}$ ) in DCM (1.34 mg, 10 eq). The color changed from blue-purple to yellow. The solution was transferred to a vial and evaporated by  $\text{N}_2$ , which was purified by column chromatography (regular silica gel, pentane/DCM=5/1) without light to get a yellow powder (0.29 mg, 94%).  $^1\text{H}$  NMR spectrum (400 MHz, acetone- $d_6$ , label: CS374\_reduced) and ESI-MS (0.1% of trifluoroacetic acid in dichloromethane, label CS374 reduced) showed the starting material **1-D<sub>2</sub>**.

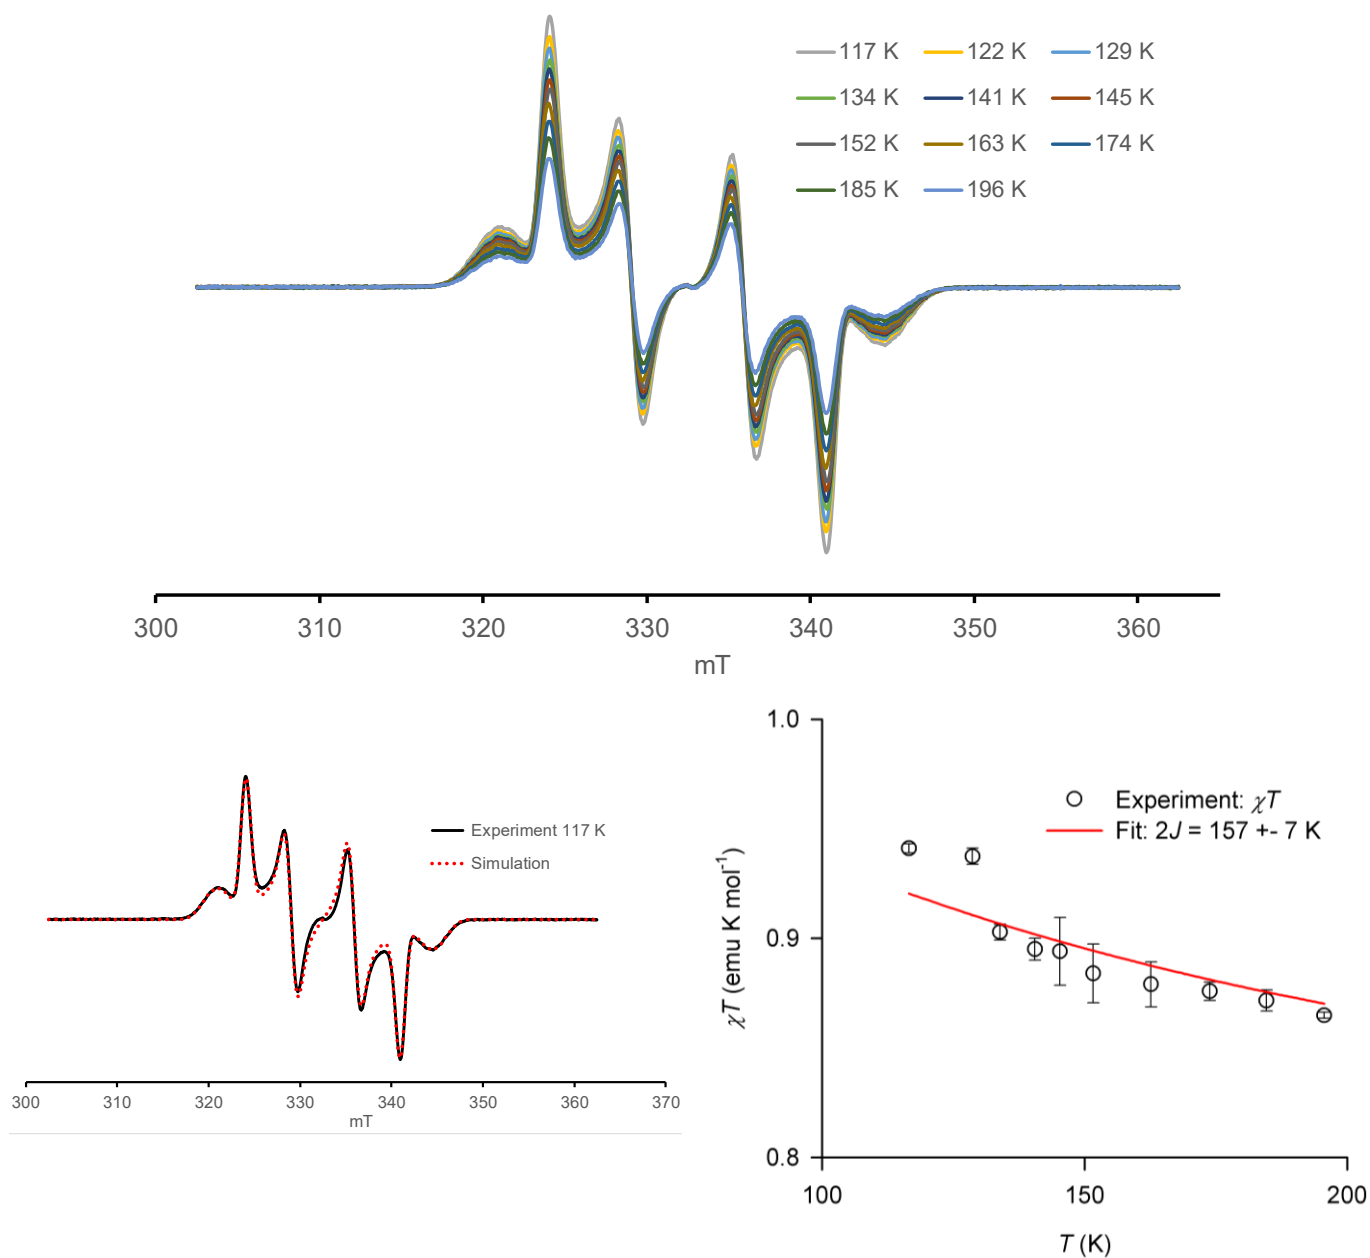

**Fig. S26.** Top panel: selected EPR spectra of 0.84 mM diradical dication  $\mathbf{1}^{2\cdot 2+} 2\text{SbF}_6^-$  (sample label: CS374) in DBP in the 117 – 196 K temperature range. Bottom left panel: EPR spectrum of 0.84 mM diradical dication  $\mathbf{1}^{2\cdot 2+} 2\text{SbF}_6^-$  at 117 K (sample label: CS374, spectrum label: CS426R13) with spectral simulation, obtained using EasySpin, of the  $|\Delta m_s| = 1$  region:  $|D/hc| = 1.108 \times 10^{-2} \text{ cm}^{-1}$ ,  $|E/hc| = 1.560 \times 10^{-3} \text{ cm}^{-1}$ ,  $|A_{zz}/hc|/2 = 7.3 \times 10^{-4} \text{ cm}^{-1}$ ,  $g_{xx} = 2.0038$ ,  $g_{yy} = 2.0037$ ,  $g_{zz} = 2.0027$ ; H-strain (MHz):  $H_x = 39.60$ ,  $H_y = 36.55$ ,  $H_z = 21.77$ . Bottom right panel: repeat quantitative EPR spectroscopy of 0.84 mM diradical dication  $\mathbf{1}^{2\cdot 2+} 2\text{SbF}_6^-$  in DBP (sample label: CS374) with 1.17 mM TEMPONE in DBP as a reference: experimental values of  $\chi T$  (mean  $\pm$  SE), the product of paramagnetic susceptibility ( $\chi$ ) and  $T$  in the  $T = 117 - 196$  K range; final numerical fit with no weighing and one variable parameter,  $2J/k = 157 \pm 7$  K (mean  $\pm$  SE), after scaling the  $\chi T$  data with a weight factor of  $N = 0.90$ .

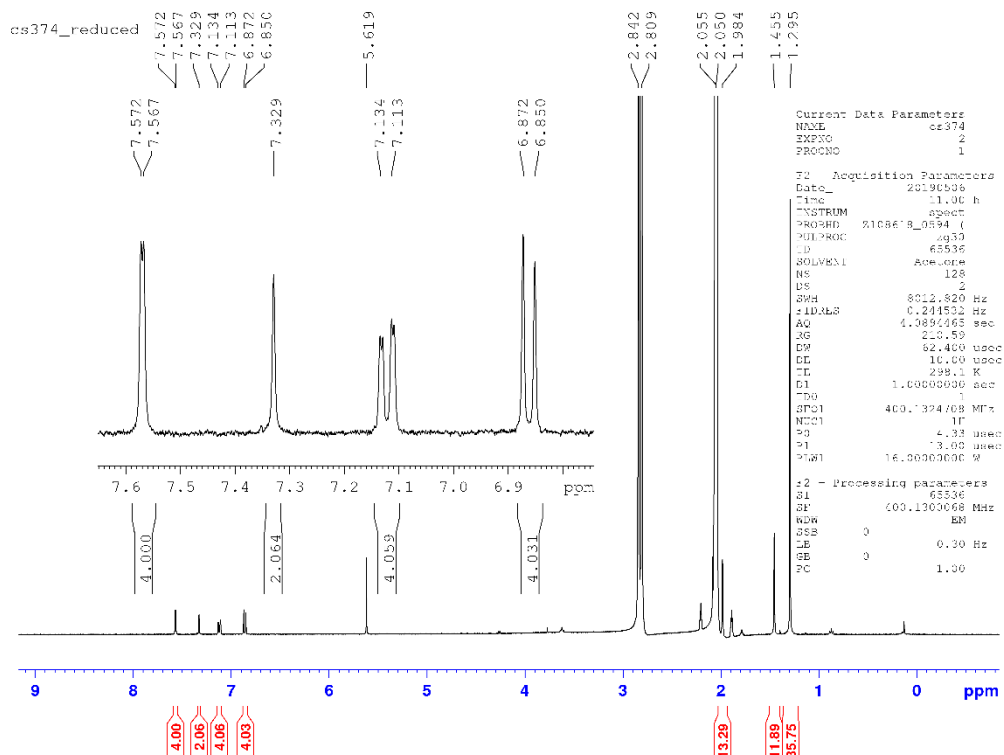

**Fig. S27.**  $^1\text{H}$  NMR spectrum (400 MHz, acetone- $d_6$ , label: CS374\_reduced) of the sample obtained after quench of diradical dication  $\mathbf{1}^{2+} 2\text{SbF}_6^-$  with  $\text{Cp}^*\text{Fe}$ , followed by purification. The spectrum shows the starting material  $\mathbf{1-D}_2$ .

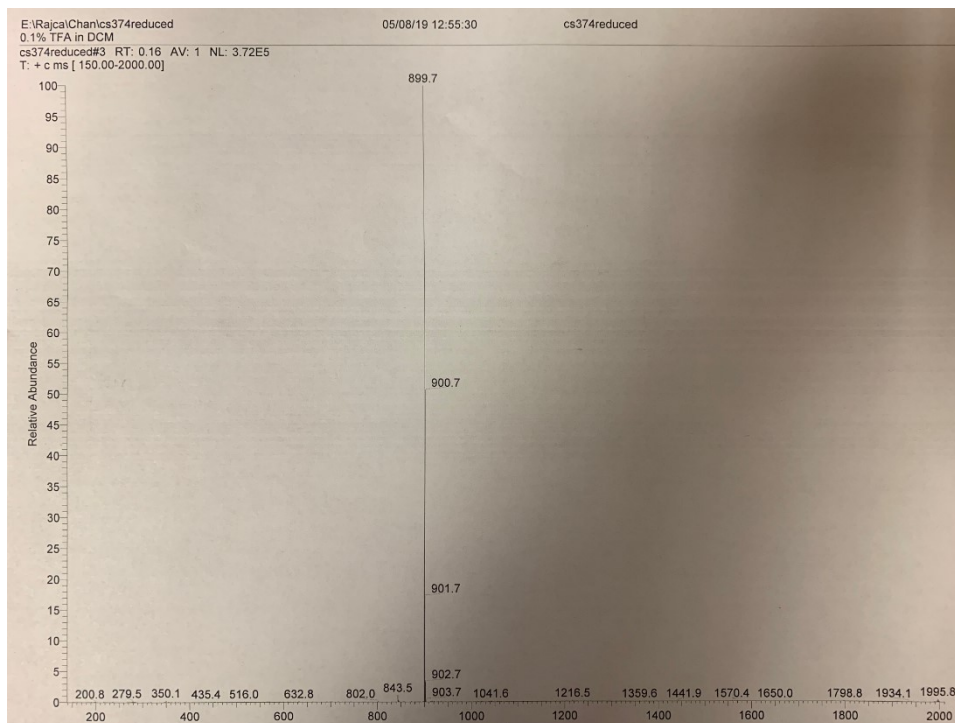

**Fig. S28.** ESI-MS (0.1% TFA in DCM, label: CS374reduced) of the sample obtained after quench of diradical dication  $\mathbf{1}^{2+} 2\text{SbF}_6^-$  with  $\text{Cp}^*\text{Fe}$ , followed by purification.



### 1.d5 Resolution of 1-D<sub>2</sub>: ECD spectroscopy.

HPLC (Agilent Technologies 1260 Infinity), equipped with Daicel CHIRALPAK AD-H column (0.46 cm  $\phi$  x 25 cm), is used to resolve racemic 1-D<sub>2</sub>. Before running the sample, the column has been equilibrated with hexane (HPLC grade) overnight at 12 °C. HPLC trace for racemic 1-D<sub>2</sub> shows two partially resolved peaks, with the 50:50 integrated ratio (Fig. S29). Two enantiomerically enriched compounds were obtained: *P,P*-1-D<sub>2</sub>, 0.82 mg (Fig. S30, label: cs-3-2-27p1) and *M,M*-1-D<sub>2</sub>, 0.90 mg (Fig. S30, label: cs-3-2-27p3); the respective %ee values were determined to 61.3% and 41.7% by Bigaussian fits (Eqs. S1A&B). The fitting was carried out using Origin software.

$$y = y_0 + He^{-0.5\left(\frac{x-x_c}{w_1}\right)^2} \quad (x < x_c) \quad (\text{S1A})$$

$$y = y_0 + He^{-0.5\left(\frac{x-x_c}{w_2}\right)^2} \quad (x > x_c) \quad (\text{S1B})$$

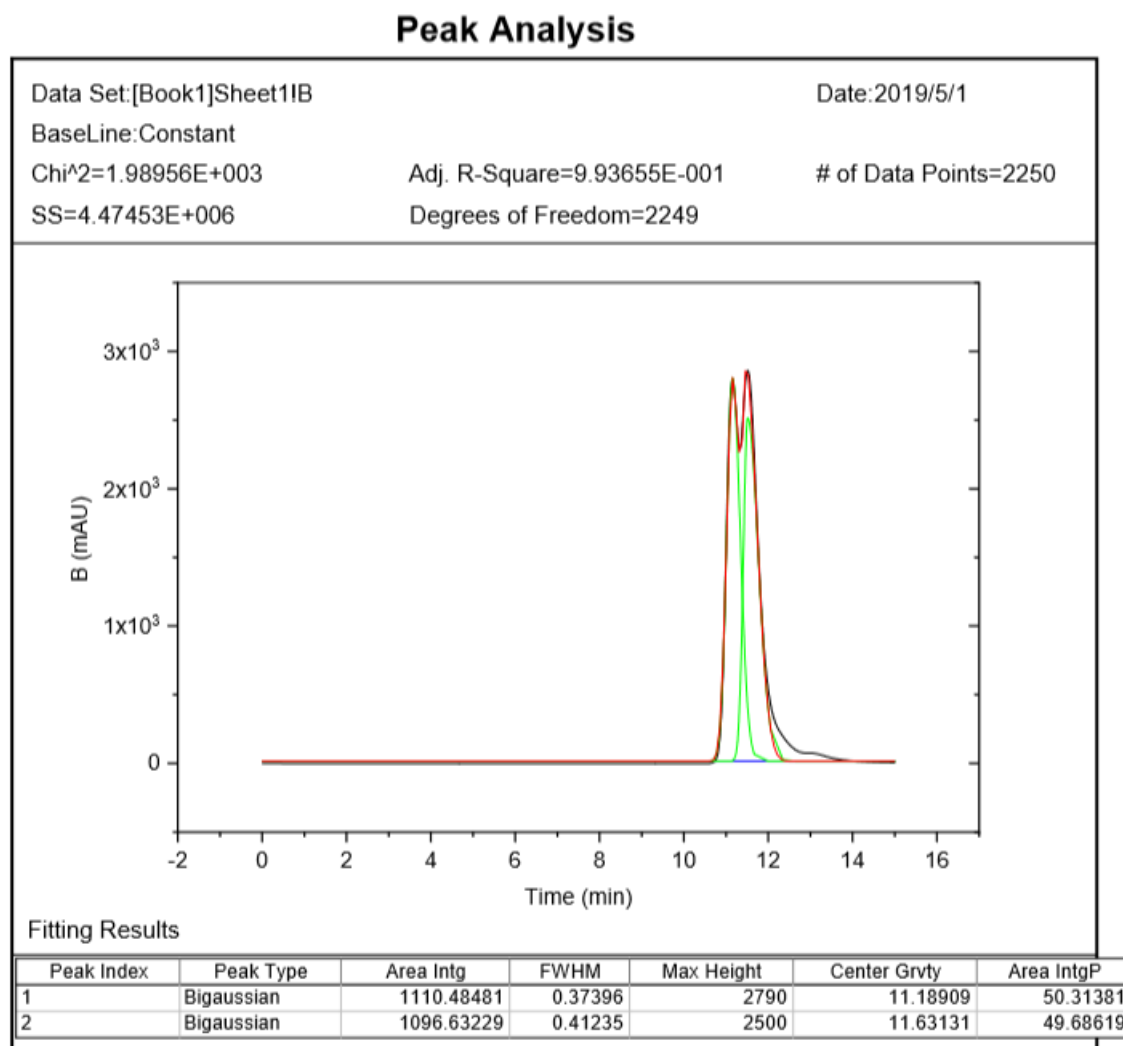

**Fig. S29.** Chiral HPLC (100% hexane, 0.3 mL/min, 12 °C) for racemic 1-D<sub>2</sub>. Bigaussian fit is shown.

### Peak Analysis

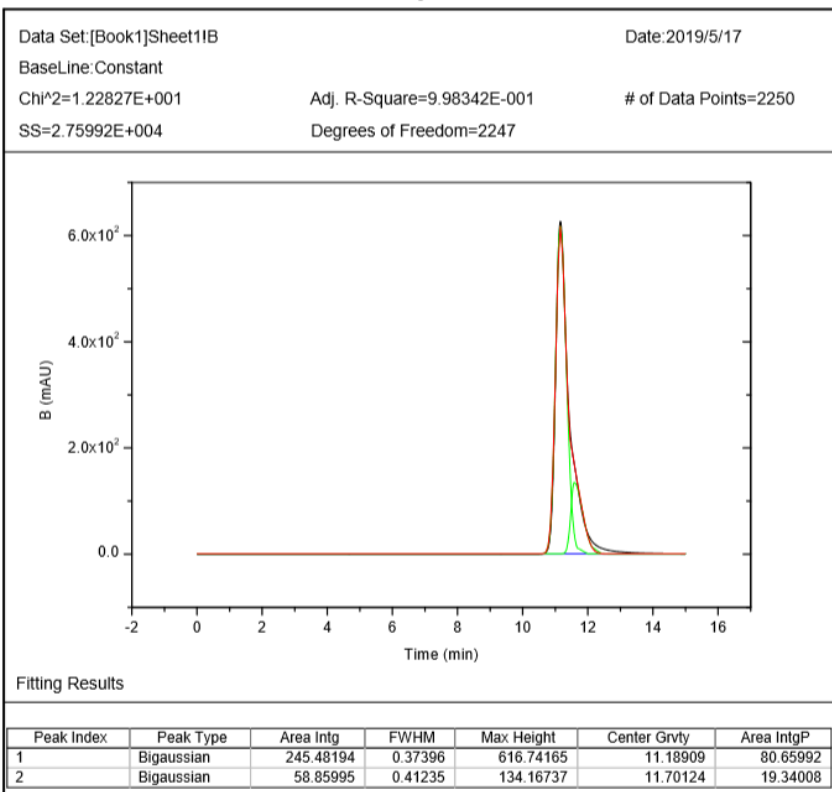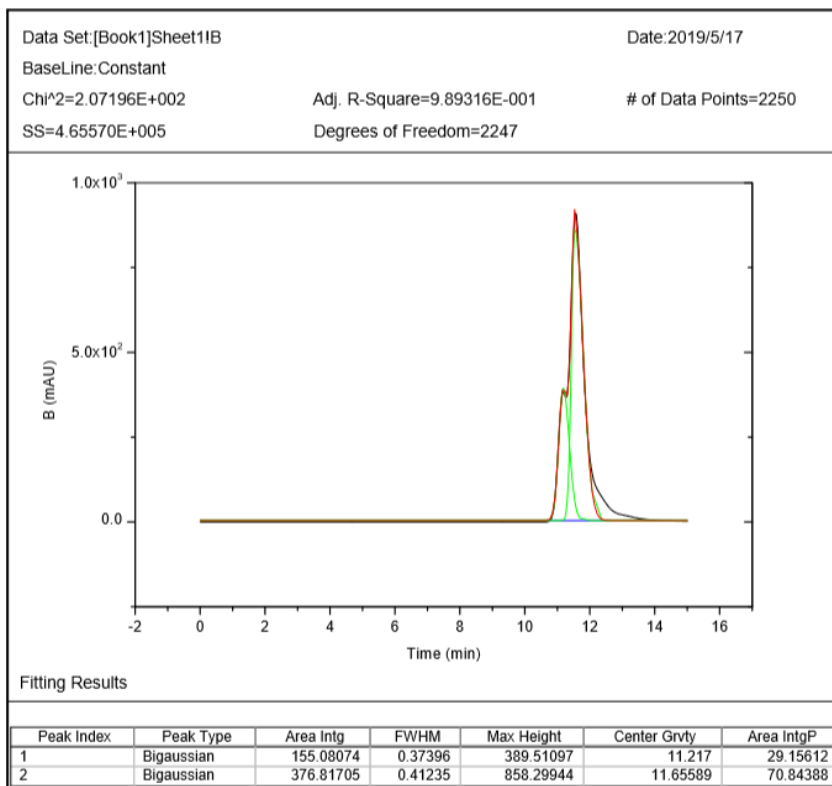

**Fig. S30.** Chiral HPLC (100% hexane, 0.3 mL/min, 12 °C) for for enantiomerically enriched **1-D<sub>2</sub>** with bigaussian fits shown; top panel: *P,P*-**1-D<sub>2</sub>** (%ee = 61.3%), bottom panel: *M,M*-**1-D<sub>2</sub>** (%ee = 41.7%).

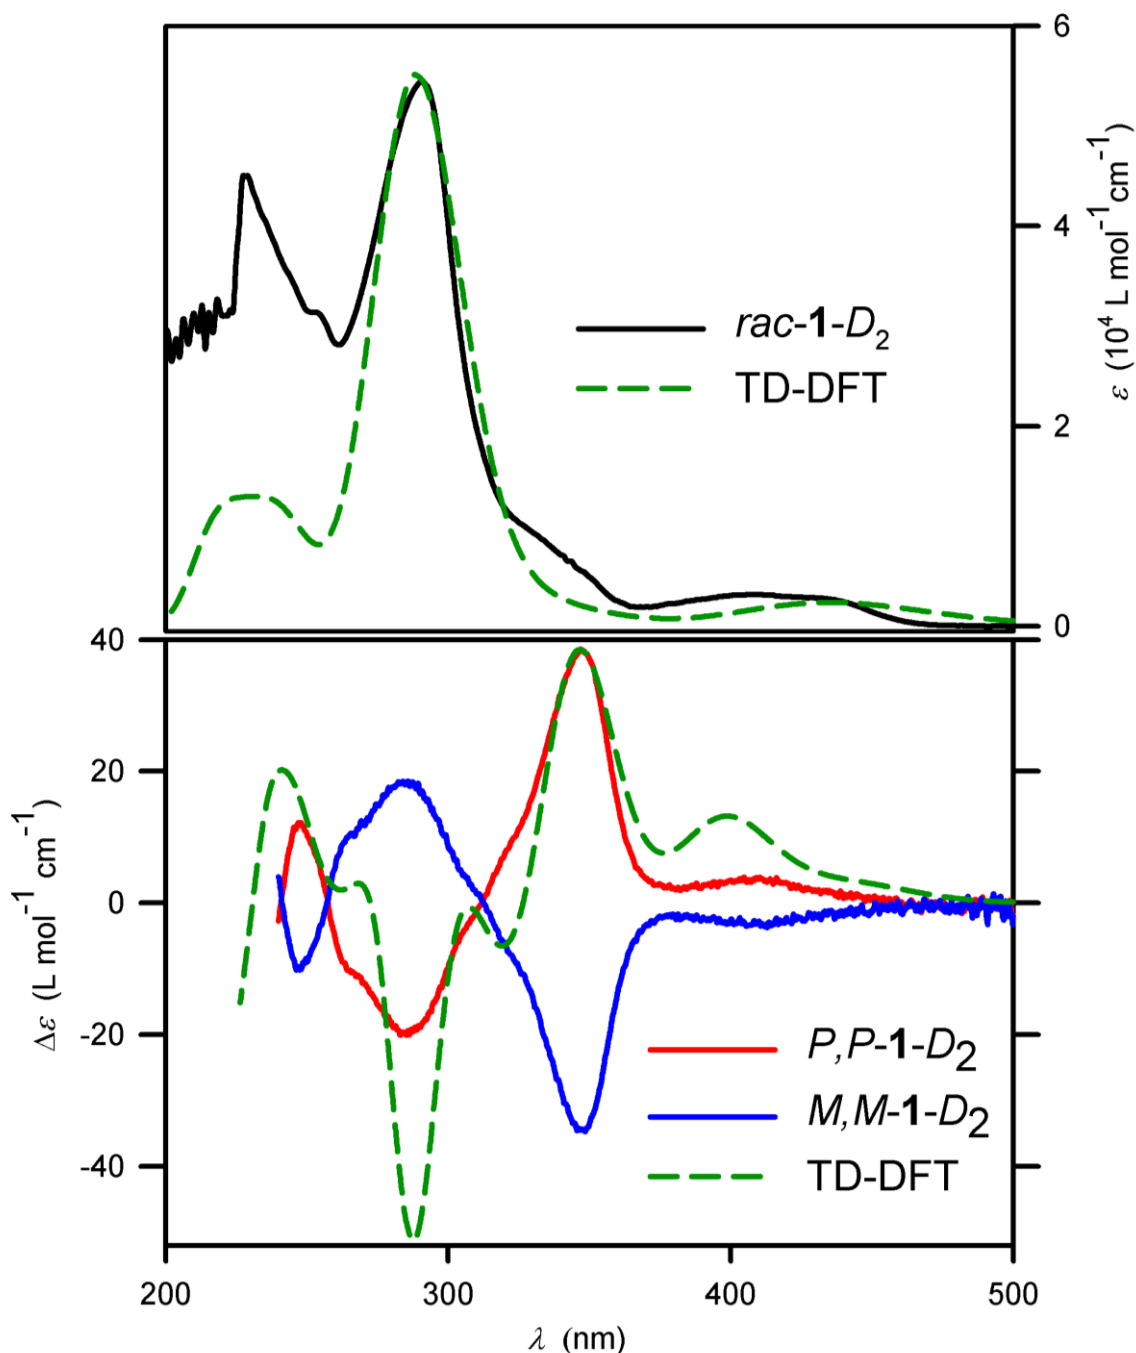

**Fig. S31.** UV-vis absorption and ECD spectra for racemic and enantiomerically enriched **1-D<sub>2</sub>**. Experimental ECD spectra are scaled by the ee. TD-DFT computed spectra for *P,P*-**1-D<sub>2</sub>** are shown using dashed green lines. Computed UV-vis and ECD spectra are convoluted with Gaussian lines (line width of 0.25 eV for UV-vis and 0.15 eV for ECD) and shifted by -0.60 and -0.65 eV, respectively; in each case, the spectra are scaled vertically to obtain reasonable fit to the experimental data. UV-vis, DCM,  $\lambda_{\text{max}}/\text{nm}$  ( $\epsilon_{\text{max}}/\text{L mol}^{-1} \text{cm}^{-1}$ ) for *rac*-**1-D<sub>2</sub>**: 229 ( $4.5 \times 10^4$ ), 291 ( $5.5 \times 10^4$ ), 407 ( $3.2 \times 10^3$ ). ECD, DCM,  $\lambda_{\text{max}}/\text{nm}$  ( $\Delta\epsilon_{\text{max}}/\text{L mol}^{-1} \text{cm}^{-1}$ ) for *P,P*-**1-D<sub>2</sub>**: 247 (12.4), 285 (-20.3), 348 (38.8), 410 (4.0).

**1.d6 Preparation of chiral diradical dication  $1^{2\cdot2+} 2\text{SbF}_6^-$  via oxidation of enantiomerically enriched  $1\text{-D}_2$  using  $[\text{NO}]^+[\text{SbF}_6]^-$  in DBP: ECD spectroscopy.**

**Table S4.** Summary of preparation of chiral diradical dication  $1^{2\cdot2+} 2\text{SbF}_6^-$  using  $[\text{NO}]^+[\text{SbF}_6]^-$  in DBP.

| run no | sample label      | $1\text{-D}_2$ (mg) | SM label (chirality, ee%)       | $[\text{NO}]^+[\text{SbF}_6]^-$ (equiv) | Figures and comments                                                                                                                                                                                                                                                                                                                             | Recovered $1\text{-D}_2$ (mg, %) |
|--------|-------------------|---------------------|---------------------------------|-----------------------------------------|--------------------------------------------------------------------------------------------------------------------------------------------------------------------------------------------------------------------------------------------------------------------------------------------------------------------------------------------------|----------------------------------|
| 1      | CS437_Dirad Dicat | 0.10                | CS32-27P1 ( <i>P,P</i> , 61.3%) | 8                                       | Initial $\chi T = 0.79 \pm 0.02$ at 117 K by quantitative EPR (Fig. S32); UV-vis-NIR, ECD spectra showing that the diradical dication is configurationally stable on the scale of day at rt (Fig. S32); quantitative EPR with $\chi T = 0.78 \pm 0.01$ at 117 K (Fig. S32); quench with $\text{Cp}^*\text{Fe}$ , $^1\text{H}$ NMR (Fig. S34).    | ~0.08, ~80%                      |
| 2      | CS441_Dirad Dicat | 0.033 <sup>a</sup>  | CS32-27P1 ( <i>P,P</i> , 61.3%) | ~10                                     | Initial $\chi T = 0.82 \pm 0.04$ at 117 K by quantitative EPR (Fig. S33); UV-vis-NIR, ECD spectra showing that the diradical dication is configurationally stable on the scale of day at rt (Fig. S33); quantitative EPR with $\chi T = 0.80 \pm 0.04$ at 117 K (Fig. S33)                                                                       | -                                |
| 3      | CS439_Dirad Dicat | 0.11                | CS32-27P3 ( <i>M,M</i> , 41.7%) | 6                                       | Initial $\chi T = 0.84 \pm 0.01$ at 117 K by quantitative EPR (Fig. S35); UV-vis-NIR, ECD spectra showing that the diradical dication is configurationally stable on the scale of 2 days at rt (Fig. S35); quantitative EPR with $\chi T = 0.82 \pm 0.02$ at 117 K (Fig. S35); quench with $\text{Cp}^*\text{Fe}$ , $^1\text{H}$ NMR (Fig. S36). | ~0.10, ~90%                      |

<sup>a</sup> Weight estimated based upon UV-vis-NIR spectrum.

**Estimate of barrier for racemization of  $M,M\text{-}1^{2\cdot2+} 2\text{SbF}_6^-$  in DBP at room temperature.**

Rate constant ( $k_1$ ) for racemization was computed from equation S2, where

$$\ln\left\{\frac{1+(M/P)}{1-(K'*M/P)}\right\} = (1+K')*k_1*t + C, \quad (\text{S2})$$

where  $K' = 1/K = k_2/k_1$ ; we have assumed that  $k_1 = k_2$ , i.e.,  $K' = 1$ ; the constant of integration  $C$ :

$C = \ln\left\{\frac{1+(M_0/P_0)}{1-(K'*M_0/P_0)}\right\}$ , where  $M_0$  and  $P_0$  are starting concentrations of  $M$  and  $P$ .

**Diradical dication  $P,P\text{-}1^{2\cdot2+} 2\text{SbF}_6^-$  generated using  $[\text{NO}]^+[\text{SbF}_6]^-$  in DBP: sample label,**

**CS437\_DiradDicat.** Chiral diradical dication  $P,P\text{-}1^{2\cdot2+} 2\text{SbF}_6^-$  (sample label: CS437\_DiradDicat) was prepared from the starting material  $P,P\text{-}1\text{-D}_2$  (0.10 mg, 0.11  $\mu\text{mol}$ , %ee = 61.3%, sample label: CS32-27P1) in a custom-made Schlenk vessel with 4-mm EPR tube, as described for racemic compound.

Distilled dibutyl phthalate (DBP, ~100  $\mu\text{L}$ ) and the oxidant  $\text{NOSbF}_6$  in distilled DBP (33 $\mu\text{L}$ , 8 equiv, 7.960 mg/mL) were used; following dilution with DBP (~400  $\mu\text{L}$ ), quantitative EPR spectroscopy at 117 K indicated  $\chi T = 0.79$  emu K mol<sup>-1</sup>; as EPR spectra show almost pure triplet state with negligible doublet impurity (Fig. S32), this relatively low value of  $\chi T$  must reflect weighing error of 0.10 mg of

starting material. Spin concentrations were obtained with TEMPONE in dibutyl phthalate as reference (conc. = 1.17 mM). The sample was kept in liquid nitrogen.

Next day, the sample was warmed up to room temperature and the dark purple/blue solution was transferred with syringe to a custom-made Schlenk vessel with UV-vis-NIR cuvette (1-mm path) under argon flow, to obtain UV-vis-NIR absorption spectra. Then the Schlenk vessel was kept on the high vacuum line at room temperature without light. After 24 h, ECD spectra (300–500 nm) were measured. After another 23 h, at room temperature, repeat ECD spectra (300–500 nm) were measured (Fig. S32). Then, another set of ECD spectra (500–900 nm) was obtained. Subsequently, the dark purple/blue solution was transferred back to the same custom-made Schlenk vessel with 4-mm EPR tube. EPR spectra were obtained at 117 K (label: CS438R1, R3 and R5) using TEMPONE in DBP as reference to obtain spin concentration; value of  $\chi T = 0.78 \text{ emu K mol}^{-1}$  was practically unchanged (Fig. S32).

Finally, the EPR tube was attached to the vacuum line, the reaction was quenched by addition of bis(pentamethylcyclopentadienyl)iron(II) in DCM (0.37 mg, 10 eq). The color changed from dark blue-purple to yellow. The solution was transferred to a vial and evaporated by  $\text{N}_2$  to give yellow oil crude, which was purified by column chromatography (regular silica gel, pentane/DCM, 5:1) without light to get a yellow solid (~0.08 mg, ~80%, sample label: CS437\_DiradDicat\_Reduced), corresponding to starting material **1-D<sub>2</sub>**, based on  $^1\text{H}$  NMR spectrum (Fig. S34).

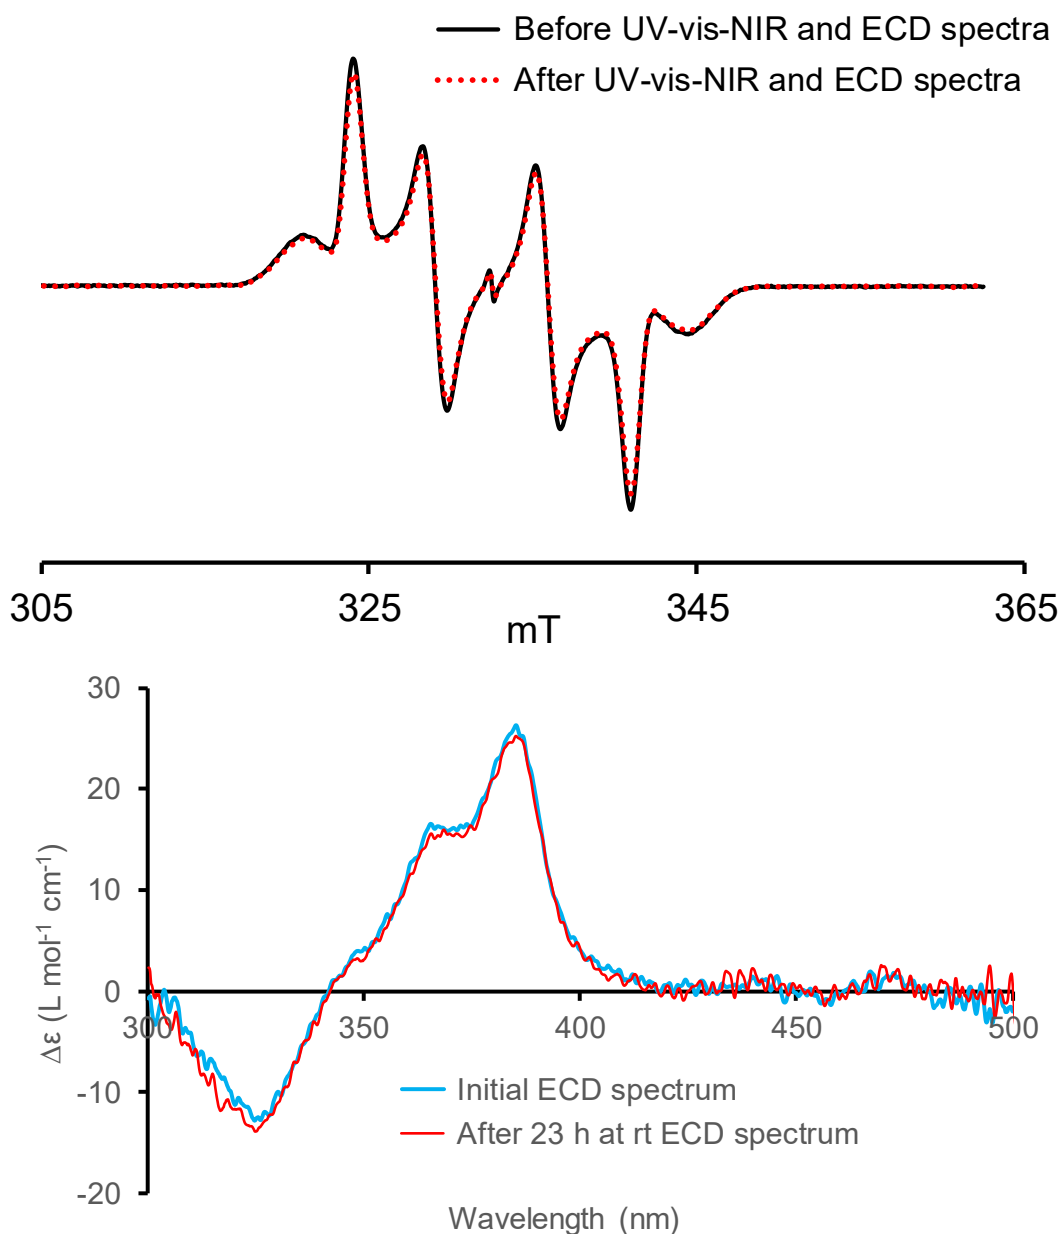

**Fig. S32.** Initial ECD/UV-vis-NIR/EPR spectroscopy experiment for diradical dication  $P,P\text{-1}^{2.2+} 2\text{SbF}_6^-$ . Top panel: EPR spectra before ( $\nu = 9.3256$  GHz, sample label: CS437\_DiradDicat, spectrum label: CS437R6) and after ( $\nu = 9.3262$  GHz, spectrum label: CS438R5) UV-vis-NIR and ECD spectra for dication  $P,P\text{-1}^{2.2+} 2\text{SbF}_6^-$ ; the respective values of  $\chi T = 0.79 \pm 0.02$  and  $0.78 \pm 0.01$  emu K mol $^{-1}$  also show practically no change. Bottom panel: ECD spectra for  $P,P\text{-1}^{2.2+} 2\text{SbF}_6^-$  (sample label: CS437\_DiradDicat) taken 23 h apart after storing the sample at room temperature; the data shows configurational stability of  $P,P\text{-1}^{2.2+} 2\text{SbF}_6^-$  on the time scale of day at room temperature, e.g., rmsd for the the two ECD spectra in the 300-450 nm region is  $0.991$  L mol $^{-1}$  cm $^{-1}$ . ECD (initial), DBP,  $\lambda_{\text{max}}/\text{nm}$  ( $\Delta\epsilon_{\text{max}}/\text{L mol}^{-1}$  cm $^{-1}$ ) for  $P,P\text{-1}^{2.2+} 2\text{SbF}_6^-$ : 327 (-13.4), 369 sh (16.4), 385 (26.4). ECD (after 23 h at rt), DBP,  $\lambda_{\text{max}}/\text{nm}$  ( $\Delta\epsilon_{\text{max}}/\text{L mol}^{-1}$  cm $^{-1}$ ) for  $P,P\text{-1}^{2.2+} 2\text{SbF}_6^-$ : 327 (-13.5), 369 sh (16.1), 385 (25.5).

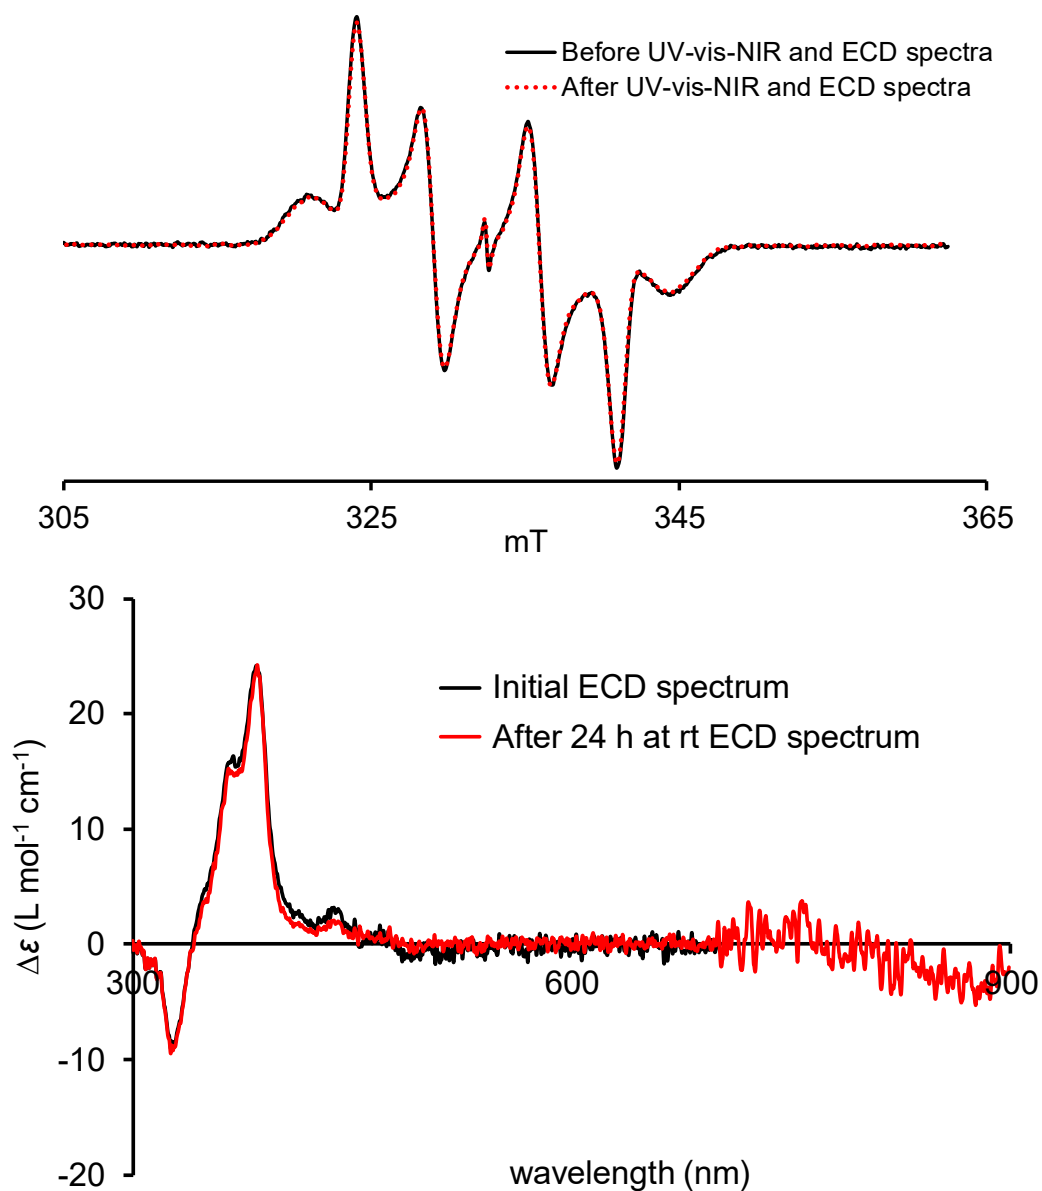

**Fig. S33.** Repeat ECD/UV-vis-NIR/EPR spectroscopy experiment for diradical dication  $P,P\text{-}1^{2\cdot 2+} 2\text{SbF}_6^-$ . Top panel: EPR spectra before ( $\nu = 9.3263$  GHz, sample label: CS441\_DiradDicat, spectrum label: CS441R5) and after ( $\nu = 9.3262$  GHz, spectrum label: CS442R5) UV-vis-NIR and ECD spectra for diradical dication  $P,P\text{-}1^{2\cdot 2+} 2\text{SbF}_6^-$ ; the respective values of  $\chi T = 0.82 \pm 0.04$  and  $0.80 \pm 0.04$  emu K mol $^{-1}$  also show practically no change. Bottom panel: ECD spectra for  $P,P\text{-}1^{2\cdot 2+} 2\text{SbF}_6^-$  (sample label: CS441\_DiradDicat) taken 24 h apart after storing the sample at room temperature; the data shows configurational stability of  $P,P\text{-}1^{2\cdot 2+} 2\text{SbF}_6^-$  on the time scale of day at room temperature, e.g., rmsd for the the two ECD spectra in the 300-450 nm region is  $0.833$  L mol $^{-1}$  cm $^{-1}$ . ECD (initial), DBP,  $\lambda_{\text{max}}/\text{nm}$  ( $\Delta\epsilon_{\text{max}}/\text{L mol}^{-1}$  cm $^{-1}$ ) for  $P,P\text{-}1^{2\cdot 2+} 2\text{SbF}_6^-$ : 327 (−8.9), 369 sh (16.3), 385 (24.2), 440 (3.0). ECD (after 24 h at rt), DBP,  $\lambda_{\text{max}}/\text{nm}$  ( $\Delta\epsilon_{\text{max}}/\text{L mol}^{-1}$  cm $^{-1}$ ) for  $P,P\text{-}1^{2\cdot 2+} 2\text{SbF}_6^-$ : 326 (−9.5), 367 sh (15.0), 385 (24.2), 440 (2.0), 876.4 (−5.3).

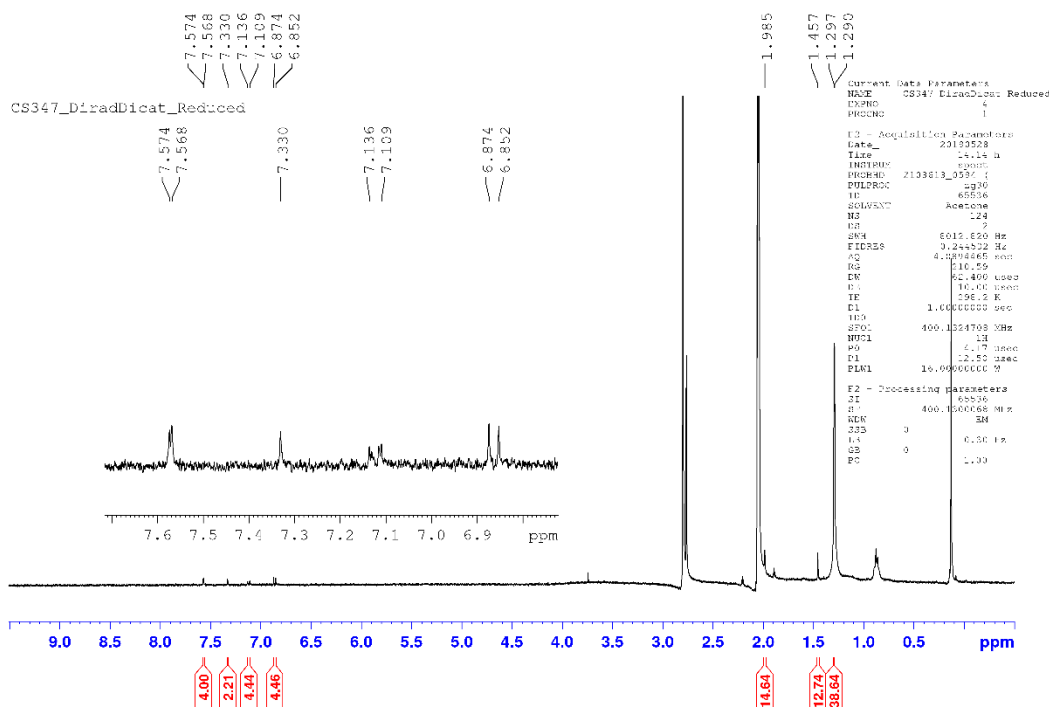

**Fig. S34.**  $^1\text{H}$  NMR spectrum (400 MHz, acetone- $d_6$ , label: CS437\_reduced) of the sample obtained after quench of diradical dication  $P,P\text{-}1^{2\cdot2+} 2\text{SbF}_6^-$  with  $\text{Cp}^*\text{}_2\text{Fe}$ , followed by purification. The spectrum shows the starting material  $1\text{-}D_2$ .

**Diradical dication  $M,M\text{-}1^{2\cdot2+} 2\text{SbF}_6^-$  generated using  $[\text{NO}]^+[\text{SbF}_6]^-$  in DBP: sample label, CS439\_DiradDicat.** Chiral diradical dication  $M,M\text{-}1^{2\cdot2+} 2\text{SbF}_6^-$  was prepared from the starting material  $M,M\text{-}1\text{-}D_2$  (0.11 mg, 0.12  $\mu\text{mol}$ , %ee = 41.7%, sample label: CS32-27P3) in a custom-made Schlenk vessel with 4-mm EPR tube, as described for racemic compound. Distilled dibutyl phthalate (DBP, ~500  $\mu\text{L}$ ) and the oxidant  $\text{NOSbF}_6$  in distilled DBP (36  $\mu\text{L}$ , 6 equiv, 5.430 mg/mL) were used to prepare a dilute, 0.227 mM sample of diradical dication (total height of solution: 7.90 cm); quantitative EPR spectroscopy at 117 K indicated  $\chi T = 0.84 \pm 0.01$  emu K  $\text{mol}^{-1}$  (label: CS439R1, R3 and R5); as EPR spectra show almost pure triplet state with negligible doublet impurity (Fig. S35), this relatively low value of  $\chi T$  must reflect weighing error of 0.11 mg of starting material. Spin concentrations were obtained with TEMPONE in dibutyl phthalate as reference (conc. = 1.17 mM). The sample was kept in liquid nitrogen.

Next day, the sample was warmed up to room temperature and the dark purple/blue solution was diluted with DBP (total height of solution: 13.10 cm) to obtain 0.137 mM solution of diradical dication. The diluted solution was transferred with syringe to a custom-made Schlenk vessel with UV-vis-NIR cuvette (2-mm path) under argon flow, to obtain ECD (300 – 700 nm) and UV-vis-NIR absorption spectra. Then, the Schlenk vessel was kept on the high vacuum line at room temperature without light. After 24 h, another two sets of ECD spectra (300–700 nm and 500–900 nm) were measured. After additional 24 h at room temperature (total of 48 h at rt), re-repeat ECD spectra (300–700 nm) were measured (Fig. S35). Subsequently, the dark purple/blue solution was transferred back to the same custom-made Schlenk vessel with 4-mm EPR tube. EPR spectra were obtained at 117 K (label:



CS440R1, R3 and R5) using TEMPONE in DBP as reference to obtain spin concentration; value of  $\chi T = 0.82 \pm 0.02$  emu K mol<sup>-1</sup> was practically unchanged (Fig. S35).

Finally, the EPR tube was attached to the vacuum line, the reaction was quenched by addition of bis(pentamethylcyclopentadienyl)iron(II) in DCM (0.38 mg, 10 eq). The color changed from dark blue-purple to yellow. The solution was transferred to a vial and evaporated by N<sub>2</sub> gas to give yellow oil crude, which was purified by column chromatography (regular silica gel, pentane/DCM = 5:1) without light to get a yellow solid (~0.1 mg, label: CS439\_DiradDicat\_Reduced).

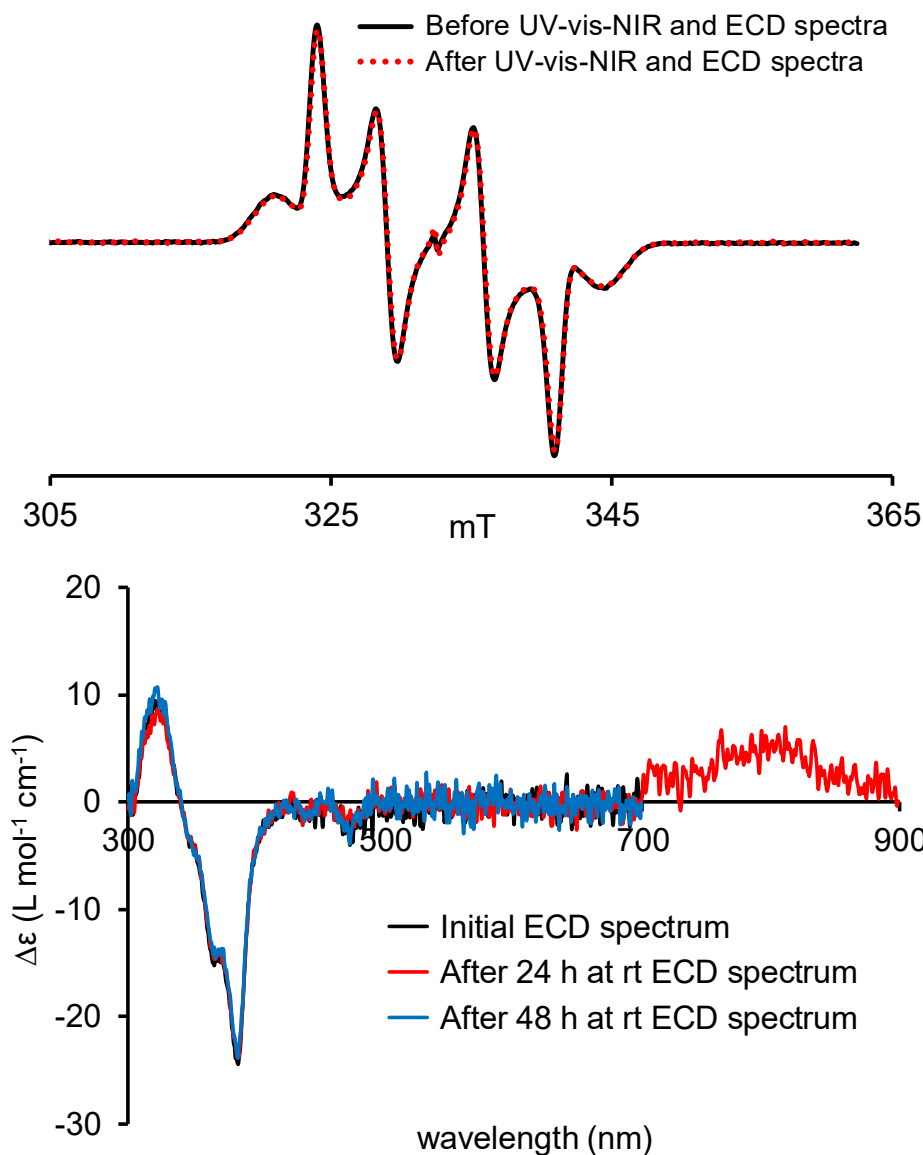

**Fig. S35.** ECD/UV-vis-NIR/EPR spectroscopy experiment for diradical dication  $M,M\text{-}1^{2+}2^{+} 2\text{SbF}_6^{-}$ . Top panel: EPR spectra before ( $\nu = 9.3251$  GHz, sample label: CS439\_DiradDicat, spectrum label: CS439R5) and after ( $\nu = 9.3262$  GHz, spectrum label: CS440R5) UV-vis-NIR and ECD spectra for diradical dication  $M,M\text{-}1^{2+}2^{+} 2\text{SbF}_6^{-}$ ; the respective values of  $\chi T = 0.84 \pm 0.01$  and  $0.82 \pm 0.02$  emu K mol $^{-1}$  also show practically no change. Bottom panel: Same data as shown in Figure 11 (bottom panel); ECD spectra for  $M,M\text{-}1^{2+}2^{+} 2\text{SbF}_6^{-}$  (sample label: CS441\_DiradDicat) taken after 24 and 48 h while the sample is kept at room temperature; the data shows configurational stability of  $M,M\text{-}1^{2+}2^{+} 2\text{SbF}_6^{-}$  on the time scale of 2 days at room temperature, e.g., rmsd for the the ECD spectra in the 300-450 nm region is 0.87 and 1.00 L mol $^{-1}$  cm $^{-1}$ , after 24 and 48 h at rt, respectively. ECD (initial), DBP,  $\lambda_{\text{max}}/\text{nm}$  ( $\Delta\epsilon_{\text{max}}/\text{L mol}^{-1} \text{ cm}^{-1}$ ) for  $M,M\text{-}1^{2+}2^{+} 2\text{SbF}_6^{-}$ : 321 (9.5), 367 sh (-15.3), 385 (-24.5), 472 (-4.0); after 24 h at rt: 323 (8.7), 368 sh (-14.7), 386 (-23.8), 811 (7.0); after 48 h at rt: 323 (10.7), 368 sh (-14.6), 385 (-23.9), 472 (-3.9). Barrier for racemization of  $>27$  kcal mol $^{-1}$  was determined based on the rate constant obtained from Eq. S2 and estimating  $<1$  % loss of %ee over 48 h at room temperature (294 K).

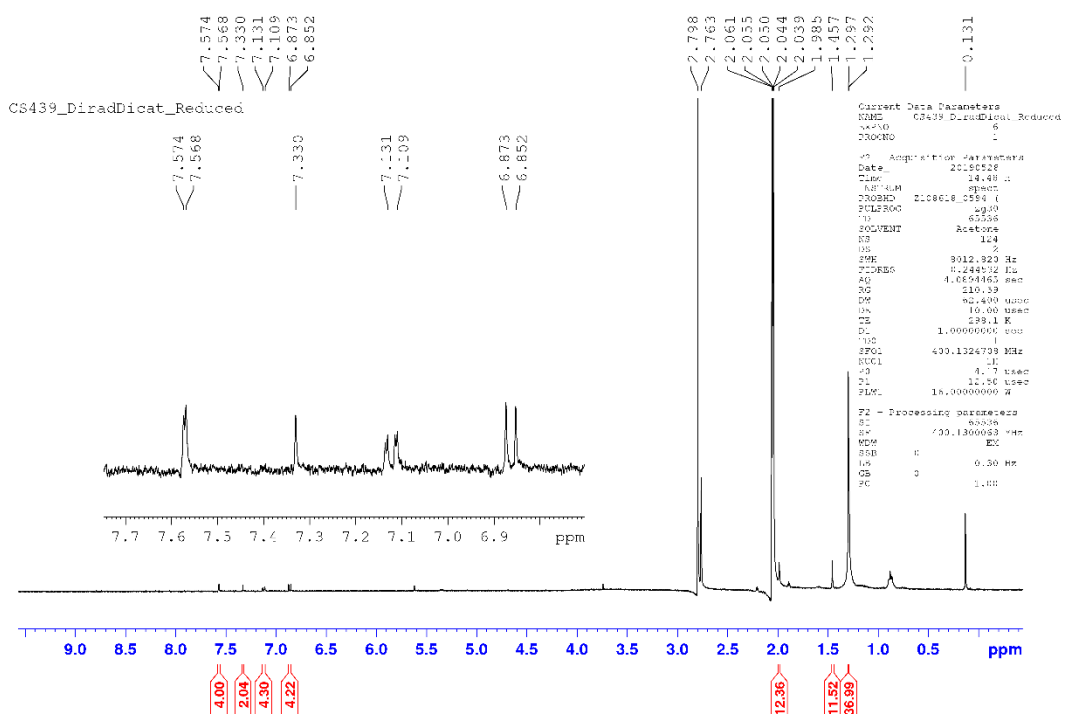

**Fig. S36.**  $^1\text{H}$  NMR spectrum (400 MHz, acetone- $d_6$ , label: CS439\_reduced) of the sample obtained after quench of diradical dication  $M, M\text{-}1^{2\cdot 2+} 2\text{SbF}_6^-$  with  $\text{Cp}^*_2\text{Fe}$ , followed by purification. The spectrum shows the starting material  $1\text{-D}_2$ .

## 1.e DFT calculations.

Geometry optimizations and frequency calculations were performed using the Gaussian 09 and Gaussian 16 program packages<sup>S11</sup> running on a 4-cpu or 16-cpu workstation under Linux operating system.

Geometries were fully optimized for neutral conjoined [5]helicenes, radical cations, and dications at the B3LYP/6-31G(d) and UB3LYP/6-31G(d) level of theory in the gas phase and at the B3LYP/6-31G(d)/IEF-PCM-UFF and UB3LYP/6-31G(d)/IEF-PCM-UFF level of theory, using solvent model for dichloromethane. Geometry optimizations were carried out by constraining molecular symmetry to either to  $D_2$  or  $C_{2h}$  point group of symmetry for minima (zero imaginary frequencies) and to  $C_1$  point group of symmetry for transition states (one imaginary frequency). IRC computations followed by geometry optimizations show that  $C_1$ -symmetric transition states are indeed correct transition states connecting  $D_2$ - and  $C_{2h}$ -symmetric minima (Tables S14 and S15). Except for geometry optimization of the neutral  $D_2$ -symmetric conjoined [5]helicene in the gas phase and some of the broken symmetry singlet states for diradical dications, all other optimized geometries have RMS forces in Cartesian coordinates less than  $7 \times 10^{-6}$  a.u. (and significantly lower in internal coordinates) that is typically better than the “tight” criterion for RMS forces in geometry optimization in Gaussian 09. All broken-symmetry wavefunctions that were tested for stability (stable=opt) were found to be stable by Gaussian 09 criteria. The results are summarized in Tables S5 – S16.

Using the B3LYP/6-31G(d)/IEF-PCM-UFF geometries, the time-dependent density functional response theory (TD-DFT) calculations at the CAM-B3LYP/6-31G(d)/IEF-PCM-UFF level of theory provided excitation energies, oscillator strengths ( $f$ ), rotatory strengths  $R$  in the dipole velocity form ( $R_{\text{vel}}$ ) and dipole length form ( $R_{\text{len}}$ ) for electronic transitions. For computed UV-vis absorption and ECD spectra, the electronic UV-vis data ( $f$ ) and ECD data in the Gaussian 09 output files were converted to stick spectra in the text file format and then convoluted with the Gaussian functions with half-width of 0.25 and 0.15 eV (for  $\mathbf{1-D}_2$ ), respectively, using graphical user interface Gabedit (version 2.5.0).<sup>S12</sup> The resultant UV and ECD spectra of  $\mathbf{1-D}_2$  were re-plotted with the wavelength (nm) axis using SigmaPlot program, with horizontal axes shifted by -0.60 and -0.65 eV, respectively. Vertical axes were scaled to

fit the experimental spectra. Computed spectra for **1**- $D_2$  are plotted in Fig. S31. For calculation of electronic absorption and ECD spectra, up to 40 excited states were computed.

The singlet-triplet energy gaps ( $\Delta E_{ST}$ ) between the triplet ground states and the first open-shell singlet excited states for diradical dications were calculated using UB3LYP and UM06-2X wave functions. The value of  $\Delta E_{ST}$  was obtained by correcting the calculated energy gap ( $\Delta E_U$ ) for spin contamination, using eq. S3.<sup>S13-S15</sup> In particular, the open-shell singlet excited states, which were calculated using broken-symmetry formalism, had a significant spin contamination as indicated by the mean values of  $S^2$  operator,  $\langle S^2_{BS} \rangle \approx 1.0$ , while the triplet ground states had  $\langle S^2_T \rangle \approx 2.0$  which is close to the expected value of  $S(S + 1) = 2$ . In eq. S3, it is assumed that the spin contamination of this singlet state originates from the triplet ground state only. The values of  $\Delta E_{ST}$  obtained using eq. S3 usually overestimate the actual singlet-triplet gaps for triplet ground state diradicals.<sup>S16,S17</sup> The calculated energy gaps,  $\Delta E_{ST}$ , are summarized in Tables S5, S6, and S8.

$$\Delta E_{ST} = \Delta E_U[\langle S^2_T \rangle / (\langle S^2_T \rangle - \langle S^2_{BS} \rangle)] \quad (S3)$$

Spin density surfaces for radicals were calculated at the UB3LYP/6-31G(d) level. Cube files were obtained using “medium” setting in Gaussian 09 or 16, and surfaces were plotted with isodensity of 0.002, 0.003, or 0.006 electron/Bohr<sup>3</sup> (Tables 12BC, S13, S15, and Figure 10 main text). Orbital plots were obtained using cube files with “coarse” setting in Gaussian 09, and surfaces were plotted with isodensity 0.02.

**Table S5.** Summary table with relative energies ( $\Delta E$  in kcal mol<sup>-1</sup>), including barriers for ring inversion (racemization) for **1**-*D*<sub>2</sub>, **1**-*C*<sub>2h</sub>, and the corresponding radical cations and diradical dications. Singlet-triplet energy gaps ( $\Delta E_{ST}$  in kcal mol<sup>-1</sup>, Eq. S3) for diradical dications.<sup>a</sup>

| DFT     | Medium    | Crit. point | Compd.                                          | State                              | $\Delta E$ | $\Delta E_{ST}$ |
|---------|-----------|-------------|-------------------------------------------------|------------------------------------|------------|-----------------|
| B3LYP   | gas phase | min         | <b>1</b> - <i>C</i> <sub>2h</sub>               | <sup>1</sup> <i>A</i> <sub>g</sub> | 0.00       | -               |
|         |           | min         | <b>1</b> - <i>D</i> <sub>2</sub>                | <sup>1</sup> <i>A</i>              | 1.08       | -               |
|         |           | TS          | <b>1</b> - <i>C</i> <sub>1</sub>                | <sup>1</sup> <i>A</i>              | 43.12      | -               |
| B3LYP   | DCM       | min         | <b>1</b> - <i>C</i> <sub>2h</sub>               | <sup>1</sup> <i>A</i> <sub>g</sub> | 0.00       | -               |
|         |           | min         | <b>1</b> - <i>D</i> <sub>2</sub>                | <sup>1</sup> <i>A</i>              | 1.08       | -               |
| M06-2X  | DCM       | min         | <b>1</b> - <i>C</i> <sub>2h</sub>               | <sup>1</sup> <i>A</i> <sub>g</sub> | 0.00       | -               |
|         |           | min         | <b>1</b> - <i>D</i> <sub>2</sub>                | <sup>1</sup> <i>A</i>              | 1.28       | -               |
|         |           | TS          | <b>1</b> - <i>C</i> <sub>1</sub>                | <sup>1</sup> <i>A</i>              | 45.03      | -               |
| UB3LYP  | gas phase | min         | <b>1</b> <sup>+</sup> - <i>C</i> <sub>2h</sub>  | <sup>2</sup> <i>A</i> <sub>g</sub> | 0.00       | -               |
|         |           | min         | <b>1</b> <sup>+</sup> - <i>D</i> <sub>2</sub>   | <sup>2</sup> <i>B</i> <sub>3</sub> | 0.14       | -               |
|         |           | TS          | <b>1</b> <sup>+</sup> - <i>C</i> <sub>1</sub>   | <sup>2</sup> <i>A</i>              | 38.14      | -               |
| UB3LYP  | DCM       | min         | <b>1</b> <sup>+</sup> - <i>C</i> <sub>2h</sub>  | <sup>2</sup> <i>A</i> <sub>g</sub> | 0.00       | -               |
|         |           | min         | <b>1</b> <sup>+</sup> - <i>D</i> <sub>2</sub>   | <sup>2</sup> <i>B</i> <sub>3</sub> | 0.12       | -               |
|         |           | TS          | <b>1</b> <sup>+</sup> - <i>C</i> <sub>1</sub>   | <sup>2</sup> <i>A</i>              | 37.69      | -               |
| UB3LYP  | gas phase | min         | <b>1</b> <sup>2+</sup> - <i>D</i> <sub>2</sub>  | <sup>3</sup> <i>B</i> <sub>3</sub> | 0.00       | 0.00            |
|         |           | min         | <b>1</b> <sup>2+</sup> - <i>D</i> <sub>2</sub>  | BS <sup>b</sup>                    | -          | 0.59            |
|         |           | min         | <b>1</b> <sup>2+</sup> - <i>C</i> <sub>2h</sub> | <sup>3</sup> <i>A</i> <sub>u</sub> | 0.51       | 0.00            |
|         |           | min         | <b>1</b> <sup>2+</sup> - <i>C</i> <sub>2h</sub> | BS <sup>b</sup>                    | -          | 0.95            |
|         |           | TS          | <b>1</b> <sup>2+</sup> - <i>C</i> <sub>1</sub>  | <sup>3</sup> <i>A</i>              | 35.61      | 0.00            |
|         |           | TS          | <b>1</b> <sup>2+</sup> - <i>C</i> <sub>1</sub>  | BS <sup>b</sup>                    | -          | 0.81            |
| UB3LYP  | DCM       | min         | <b>1</b> <sup>2+</sup> - <i>D</i> <sub>2</sub>  | <sup>3</sup> <i>B</i> <sub>3</sub> | 0.00       | 0.00            |
|         |           | min         | <b>1</b> <sup>2+</sup> - <i>D</i> <sub>2</sub>  | BS <sup>b</sup>                    | -          | 0.71            |
|         |           | min         | <b>1</b> <sup>2+</sup> - <i>C</i> <sub>2h</sub> | <sup>3</sup> <i>A</i> <sub>u</sub> | 0.42       | 0.00            |
|         |           | min         | <b>1</b> <sup>2+</sup> - <i>C</i> <sub>2h</sub> | BS <sup>b</sup>                    | -          | 1.08            |
|         |           | TS          | <b>1</b> <sup>2+</sup> - <i>C</i> <sub>1</sub>  | <sup>3</sup> <i>A</i>              | 35.45      | -               |
| UM06-2X | DCM       | min         | <b>1</b> <sup>2+</sup> - <i>D</i> <sub>2</sub>  | <sup>3</sup> <i>B</i> <sub>3</sub> | 0.00       | 0.00            |
|         |           | min         | <b>1</b> <sup>2+</sup> - <i>D</i> <sub>2</sub>  | BS <sup>b</sup>                    | -          | 1.12            |
|         |           | min         | <b>1</b> <sup>2+</sup> - <i>C</i> <sub>2h</sub> | <sup>3</sup> <i>A</i> <sub>u</sub> | 0.30       | 0.00            |
|         |           | min         | <b>1</b> <sup>2+</sup> - <i>C</i> <sub>2h</sub> | BS <sup>b</sup>                    | -          | 0.81            |
|         |           | TS          | <b>1</b> <sup>2+</sup> - <i>C</i> <sub>1</sub>  | <sup>3</sup> <i>A</i>              | 37.96      | -               |

<sup>a</sup> All computations are carried out using 6-31G(d) basis set. <sup>b</sup> BS corresponds to broken-symmetry singlet.

**Table S6.** Model simplified bishydrazines **1a** and the corresponding radical cations and diradical dications. The B3LYP/6-31G(d)+ZPVE and UB3LYP/6-31G(d)+ZPVE energies in the gas phase ( $E^\circ + \text{ZPVE}$ , hartree), and UB3LYP/6-31G(d)/IEF-PCM-UFF+ZPVE energies ( $E^\circ + \text{ZPVE}$ , hartree) in dichloromethane (DCM) and in water, zero point vibrational energies (hartree), lowest vibrational frequencies ( $\text{cm}^{-1}$ ), RMS gradient norms (a.u.), and relative energies ( $\Delta E$ ,  $\text{kcal mol}^{-1}$ ) at the optimized geometries for charge/spin species. All computations listed in this Table were carried out with keyword `int=(grid=ultrafine)`.<sup>a</sup>

| Compd.                   | Charge spin | Medium  | Point on PES <sup>b</sup> | Point group | El. State           | $\langle S^2 \rangle$ | $E^\circ$      | ZPVE     | $E^\circ + \text{ZPVE}$ | RMS gradient norm <sup>b</sup> ( $\times 10^{-6}$ ) | Lowest vibrational frequencies              | $\mu$ | $\Delta E$              |
|--------------------------|-------------|---------|---------------------------|-------------|---------------------|-----------------------|----------------|----------|-------------------------|-----------------------------------------------------|---------------------------------------------|-------|-------------------------|
| <b>1a</b>                | 0,0         | gas ph. | Min                       | $C_{2h}$    | $^1A_g$             | 0                     | -682.23555507  | 0.206388 | -682.029167             | 2.09                                                | 55.3, 106.0, 186.6                          | 0.00  | 0.00                    |
| <b>1a</b>                | 0,0         | gas ph. | Min                       | $D_2$       | $^1A$               | 0                     | -682.23042511  | 0.206441 | -682.023984             | 0.05                                                | 78.8, 80.9, 131.2                           | 0.00  | 3.25                    |
| <b>1a<sup>•+</sup></b>   | 1,1/2       | gas ph. | Min                       | $C_{2h}$    | $^2A_g$             | 0.7625                | -682.01589102  | 0.205673 | -681.810218             | 0.45                                                | 73.9, 88.2, 123.1                           | 0.00  | 0.00                    |
| <b>1a<sup>•+</sup></b>   | 1,1/2       | gas ph. | Min                       | $D_2$       | $^2B_2$             | 0.7627                | -682.01614022  | 0.205964 | -681.810176             | 0.52                                                | 88.2, 110.2, 124.4                          | 0.00  | 0.03                    |
| <b>1a<sup>•+</sup></b>   | 1,1/2       | gas ph. | 2 imag. freqs.            | $D_{2h}$    | $^2B_{2g}$          | 0.7643                | -682.010002820 | 0.203229 | -681.806774             | 5.22                                                | <i>i456.7</i> , <i>i451.1</i> , 55.0, 121.1 | 0.00  | 2.16                    |
| <b>1a<sup>•+</sup></b>   | 1,1/2       | DCM     | Min                       | $C_2$       | $^2A$               | 0.7582                | -682.081811294 | 0.205948 | -681.875863             | 3.18                                                | 21.4, 88.2, 96.9                            | 4.66  | 0.00                    |
| <b>1a<sup>•+</sup></b>   | 1,1/2       | DCM     | TS                        | $D_2$       | $^2B_2$             | 0.7640                | -682.08082567  | 0.206018 | -681.874808             | 0.44                                                | <i>i360.4</i> , 86.5, 135.3                 | 0.00  | 0.66                    |
| <b>1a<sup>•+</sup></b>   | 1,1/2       | DCM     | TS                        | $C_{2h}$    | $^2A_g$             | 0.7638                | -682.080345619 | 0.205628 | -681.874718             | 0.62                                                | <i>i384.3</i> , 87.2, 124.7                 | 0.00  | 0.72                    |
| <b>1a<sup>•+</sup></b>   | 1,1/2       | water   | Min                       | $C_2$       | $^2A$               | 0.7583                | -682.090133432 | 0.206371 | -681.883762             | 1.70                                                | 86.9, 93.1, 154.0                           | 5.03  | 0.00                    |
| <b>1a<sup>•+</sup></b>   | 1,1/2       | water   | TS                        | $D_2$       | $^2B_2$             | 0.7643                | -682.088533760 | 0.205626 | -681.882908             | 1.99                                                | <i>i411.7</i> , 83.3, 132.6                 | 0.00  | 0.54                    |
| <b>1a<sup>•+</sup></b>   | 1,1/2       | water   | TS                        | $C_{2h}$    | $^2A_g$             | 0.7641                | -682.088149211 | 0.205354 | -681.882795             | 2.53                                                | <i>i422.9</i> , 87.1, 125.6                 | 0.00  | 0.61                    |
| <b>1a<sup>2•2+</sup></b> | 2,1         | gas ph. | Min                       | $D_{2h}$    | Triplet- $^3B_{2u}$ | 2.0283                | -681.657433460 | 0.206544 | -681.450889             | 0.75                                                | 95.4, 133.4, 208.6                          | 0.00  | 0.00                    |
| <b>1a<sup>2•2+</sup></b> | 2,0         | gas ph. | Min                       | $D_{2h}$    | *BSsinglet          | 0.9634                | -681.65368958  | 0.206168 | -681.447522             | 0.90                                                | 92.9, 129.3, 193.2                          | 0.00  | <b>4.02<sup>c</sup></b> |
| <b>1a<sup>2•2+</sup></b> | 2,1         | water   | Min                       | $D_{2h}$    | Triplet- $^3B_{2u}$ | 2.0304                | -681.916530887 | 0.207416 | -681.709114             | 3.92                                                | 100.9, 117.8, 223.6                         | 0.00  | 0.00                    |
| <b>1a<sup>2•2+</sup></b> | 2,0         | water   | Min                       | $D_{2h}$    | BSsinglet           | 0.9293                | -681.913421268 | 0.207147 | -681.706275             | 6.18                                                | 99.6, 117.6, 214.4                          | 0.00  | <b>3.29<sup>c</sup></b> |

<sup>a</sup>1 Hartree = 627.51  $\text{kcal mol}^{-1}$ . <sup>b</sup>In Cartesian coordinates. <sup>c</sup> $\Delta E_{\text{ST}}$ , Eq. S3 \*Wavefunction was tested for stability (stable=opt) and was found to be stable.

**Table S7.** Conjoined [5]helicenes:  $D_2$ -symmetric ( $P,P$ )-1- $D_2$ ,  $C_{2h}$ -symmetric (*meso*) ( $P,M$ )-1- $C_{2h}$ ,  $C_1$ -symmetric transition state TS-( $P$ )-1- $C_1$ , and the corresponding radical cations. The B3LYP/6-31G(d)+ZPVE and UB3LYP/6-31G(d)+ZPVE energies in the gas phase ( $E^\circ + \text{ZPVE}$ , hartree) and the B3LYP/6-31G(d)/IEF-PCM-UFF+ZPVE, M06-2X/6-31G(d)/IEF-PCM-UFF+ZPVE, and UB3LYP/6-31G(d)/IEF-PCM-UFF+ZPVE energies ( $E^\circ + \text{ZPVE}$ , hartree) in dichloromethane (DCM), zero point vibrational energies (ZPVE, hartree), lowest vibrational frequencies ( $\text{cm}^{-1}$ ), RMS gradient norms (a.u.), and relative energies ( $\Delta E$ ,  $\text{kcal mol}^{-1}$ ) at the optimized geometries for each state. Transition states for racemization of conjoined [5]helicenes possess  $C_1$  point group of symmetry.<sup>a</sup>

| Charge, spin | DFT                  | Medium  | Point on PES    | Point group (state) | Electronic state | $\langle S^2 \rangle$ | $E^\circ$      | ZPVE     | $E^\circ + \text{ZPVE}$ | RMS gradient norm <sup>b</sup> ( $\times 10^{-6}$ ) | Lowest vibrational frequencies <sup>c</sup>            | $\mu$ | $\Delta E$   |
|--------------|----------------------|---------|-----------------|---------------------|------------------|-----------------------|----------------|----------|-------------------------|-----------------------------------------------------|--------------------------------------------------------|-------|--------------|
| 0,0          | B3LYP                | gas ph. | Min             | $C_{2h}$            | $^1A_g$          | 0                     | -2702.42829142 | 1.234401 | -2701.193891            | 2.62                                                | 13.2, 14.3, 18.4                                       | 0.00  | 0.00         |
| 0,0          | B3LYP                | gas ph. | Min             | $D_2$               | $^1A$            | 0                     | -2702.42652661 | 1.234362 | -2701.192164            | 8.98                                                | 14.1, 14.7, 20.2                                       | 0.00  | 1.08         |
| 0,0          | B3LYP                | gas ph. | TS              | $C_1$               | $^1A$            | 0                     | -2702.35839345 | 1.233226 | -2701.125167            | 0.75                                                | <b><i>i</i>52.3</b> , 14.3, 16.7                       | 1.66  | <b>43.12</b> |
| 0,0          | B3LYP                | DCM     | Min             | $C_{2h}$            | $^1A_g$          | 0                     | -2702.43631751 | 1.233152 | -2701.203165            | 4.08                                                | 13.2, 14.6, 18.3                                       | 0.00  | 0.00         |
| 0,0          | B3LYP                | DCM     | Min             | $D_2$               | $^1A$            | 0                     | -2702.43460513 | 1.233163 | -2701.201442            | 0.11                                                | 13.9, 14.5, 20.0                                       | 0.00  | 1.08         |
| 0,0          | UM06-2X <sup>e</sup> | DCM     | Min             | $C_{2h}$            | $^1A_g$          | 0                     | -2701.31593887 | 1.246179 | -2700.069760            | 0.24                                                | 13.7, 15.7, 19.4                                       | 0.00  | 0.00         |
| 0,0          | UM06-2X <sup>e</sup> | DCM     | Min             | $D_2$               | $^1A$            | 0                     | -2701.31393953 | 1.246215 | -2700.067725            | 0.09                                                | 14.7, 15.0, 22.2                                       | 0.00  | 1.28         |
| 0,0          | UM06-2X <sup>e</sup> | DCM     | TS <sup>d</sup> | $C_1$               | $^1A$            | 0                     | -2701.24305214 | 1.245059 | -2699.997993            | 0.27                                                | <b><i>i</i>34.3</b> , 14.6, 17.5                       | 2.09  | <b>45.03</b> |
| 1,1/2        | UB3LYP               | gas ph. | Min             | $C_{2h}$            | $^2A_g$          | 0.7601                | -2702.23154745 | 1.235038 | -2700.996509            | 3.86                                                | 13.3, 14.0, 19.0                                       | 0.00  | 0.00         |
| 1,1/2        | UB3LYP               | gas ph. | Min             | $D_2$               | $^2B_3$          | 0.7601                | -2702.23141674 | 1.234683 | -2700.996733            | 2.27                                                | 12.7, 13.9, 17.5                                       | 0.00  | 0.14         |
| 1,1/2        | UB3LYP               | gas ph. | TS              | $C_1$               | $^2A$            | 0.7598                | -2702.16975043 | 1.234021 | -2700.935729            | 1.83                                                | <b><i>i</i>60.9</b> , 15.1, 16.6                       | 5.25  | <b>38.14</b> |
| 1,1/2        | UB3LYP               | gas ph. | 2 imag. freqs.  | $C_{2h}$            | $^2B_g$          | 0.7667                | -2702.07993638 | 1.230917 | -2700.849019            | 0.71                                                | <b><i>i</i>101.8</b> , <b><i>i</i>96.4</b> , 9.8, 15.0 | 0.00  | 92.55        |
| 1,1/2        | UB3LYP               | DCM     | Min             | $C_{2h}$            | $^2A_g$          | 0.7599                | -2702.27058593 | 1.233896 | -2701.036690            | 4.50                                                | 7.9, 14.2, 19.7                                        | 0.00  | 0.00         |
| 1,1/2        | UB3LYP               | DCM     | Min             | $D_2$               | $^2B_3$          | 0.7599                | -2702.27048330 | 1.234025 | -2701.036459            | 0.36                                                | 11.6, 14.3, 14.5                                       | 0.00  | 0.12         |
| 1,1/2        | UB3LYP               | DCM     | TS              | $C_1$               | $^2A$            | 0.7586                | -2702.21029074 | 1.233664 | -2700.976626            | 2.91                                                | <b><i>i</i>45.7</b> , 16.1, 17.8                       | 8.04  | <b>37.69</b> |

<sup>a</sup> 1 Hartree = 627.51  $\text{kcal mol}^{-1}$ . <sup>b</sup> In Cartesian coordinates. <sup>c</sup> All calculated structures, indicated as “Min”, correspond to minima on the potential energy surface (PES, zero imaginary vibrational frequencies); structures, indicated as “TS”, correspond to transition states on the PES (one imaginary vibrational frequency) and structures indicated as “2 imag. freqs.” correspond to stationary points at the PES with two imaginary vibrational frequencies. <sup>d</sup> Following IRC starting from the TS, optimization of one of the structures gave  $C_{2h}$ -symmetric double helicene (see: Table S14 below). <sup>e</sup> int=(grid=ultrafine) G09 keyword was used.



**Table S8.** Diradical dications of conjoined [5]helicenes:  $D_2$ -symmetric ( $P,P$ )- $\mathbf{1}^{2,2+}$ - $D_2$ ,  $C_{2h}$ -symmetric (*meso*) ( $P,M$ )- $\mathbf{1}^{2,2+}$ - $C_{2h}$ , and  $C_1$ -symmetric transition state TS-( $P$ )- $\mathbf{1}^{2,2+}$ - $C_1$ : UB3LYP/6-31G(d)+ZPVE (in the gas phase) and UB3LYP/6-31G(d)/IEF-PCM-UFF+ZPVE (in DCM), and UM06-2X/6-31G(d)/IEF-PCM-UFF+ZPVE (in DCM) energies (hartree), zero point vibrational energies (hartree), lowest vibrational frequencies ( $\text{cm}^{-1}$ ), RMS gradient norms (a.u.) in Cartesian coordinates, relative energies for triplet states ( $\text{kcal mol}^{-1}$ ), and S-T splittings ( $\Delta E_{\text{ST}}$  in  $\text{kcal mol}^{-1}$ , Eq. S3). Two racemic transition states for racemization of conjoined [5]helicenes [ $D_2$ -( $P,P$ ) to  $C_{2h}$ -( $P,M$ ) to  $D_2$ -( $M,M$ )] possess  $C_1$  point group of symmetry. All computations listed in this Table were carried out with keyword `int=(grid=ultrafine)`.<sup>a</sup>

|                                | DFT     | Medium  | Point on PES    | State             | Geometry   | Spin densities                                     | $E^\circ$ (gas phase) | ZPVE     | $E^\circ + \text{ZPVE}$ | $\langle S^2 \rangle$ | RMS gradient norm ( $\times 10^{-6}$ ) | Lowest vibrational frequencies      | Rel. triplet energy ( $\text{kcal mol}^{-1}$ ) | $\Delta E_{\text{U}}(\text{S-T})$ | $\Delta E_{\text{ST}}$ |
|--------------------------------|---------|---------|-----------------|-------------------|------------|----------------------------------------------------|-----------------------|----------|-------------------------|-----------------------|----------------------------------------|-------------------------------------|------------------------------------------------|-----------------------------------|------------------------|
| $\mathbf{1}^{2,2+}$ - $D_2$    | UB3LYP  | Gas ph. | Min             | *Triplet- $^3B_3$ | triplet    | N1=N2=<br>N48=N49=<br>+0.247                       | -2701.93771786        | 1.234754 | -2700.702964            | 2.0205                | 0.04                                   | 12.7, 13.8,<br>20.9                 | <b>0.00</b>                                    | 0.00                              | <b>0.00</b>            |
|                                |         |         |                 | BS-singlet        | triplet    | N1=+0.244<br>N2=-0.244<br>N48=-0.244<br>N49=+0.244 | -2701.93710255        | -        | -                       | 0.9840                | -                                      | -                                   | -                                              | 0.39                              | <b>0.75</b>            |
|                                |         |         |                 | *BS-singlet       | BS-singlet | N1=+0.242<br>N2=-0.242<br>N48=-0.242<br>N49=+0.242 | -2701.93719348        | 1.234717 | -2700.702476            | 0.9753                | 1.54                                   | 12.9, 13.8,<br>20.9                 | -                                              | 0.31                              | <b>0.59</b>            |
| $\mathbf{1}^{2,2+}$ - $C_{2h}$ | UB3LYP  | Gas ph. | Min             | Triplet- $^3A_u$  | triplet    | N1=N2=<br>N48=N49=<br>+0.242                       | -2701.93695236        | 1.234807 | -2700.702145            | 2.0201                | 4.34                                   | 13.3, 14.5,<br>19.7                 | <b>0.51</b>                                    | 0.00                              | <b>0.00</b>            |
|                                |         |         |                 | BS-singlet        | triplet    | N1=+0.241<br>N2=-0.241<br>N48=-0.241<br>N49=+0.241 | -2701.93607115        | -        | -                       | 0.9943                | -                                      | -                                   | -                                              | 0.55                              | <b>1.09</b>            |
|                                |         |         |                 | *BS-singlet       | BS-singlet | N1=+0.240<br>N2=-0.240<br>N48=-0.240<br>N49=+0.240 | -2701.93612640        | 1.234751 | -2700.701376            | 0.9899                | 9.68                                   | 13.6, 14.6,<br>19.7                 | -                                              | 0.48                              | <b>0.95</b>            |
| $\mathbf{1}^{2,2+}$ - $C_1$    | UB3LYP  | Gas ph. | TS <sup>c</sup> | Triplet- $^3A$    | triplet    | N1=+0.295<br>N2=+0.227<br>N30=+0.264<br>N31=+0.301 | -2701.87955672        | 1.233775 | -2700.645781            | 2.0214                | 0.52                                   | <b><i>i55.5</i></b> , 12.8,<br>16.2 | <b>35.61</b>                                   | 0.00                              | <b>0.00</b>            |
|                                |         |         |                 | *BS-singlet       | BS-singlet | N1=-0.289<br>N2=-0.223<br>N30=+0.258<br>N31=-0.296 | -2701.87881227        | 1.233700 | -2700.645112            | 0.9763                | 0.90                                   | <b><i>i56.8</i></b> , 13.0,<br>16.3 | -                                              | 0.42                              | <b>0.81</b>            |
|                                |         |         |                 | **singlet         | singlet    | N1=N2=<br>N30=N31=<br>0.000                        | -2701.86866592        | 1.233848 | -2700.634818            | 0.0000                | 4.61                                   | <b><i>i61.0</i></b> , 14.1,<br>16.2 | 41.77                                          | 6.88                              | <b>6.88</b>            |
| $\mathbf{1}^{2,2+}$ - $D_2$    | UB3LYP  | DCM     | Min             | Triplet- $^3B_3$  | triplet    | N1=N2=<br>N48=N49=<br>+0.253                       | -2702.07978422        | 1.235408 | -2700.844376            | 2.0207                | 0.03                                   | 13.8, 15.6,<br>21.0                 | <b>0.00</b>                                    | 0.00                              | <b>0.00</b>            |
|                                |         |         |                 | BS-singlet        | triplet    | N1=+0.250<br>N2=-0.250<br>N48=-0.250<br>N49=+0.250 | -2702.07909951        | -        | -                       | 0.9768                | -                                      | -                                   | -                                              | 0.43                              | <b>0.83</b>            |
|                                |         |         |                 | BS-singlet        | BS-singlet | N1=+0.247<br>N2=-0.247<br>N48=-0.247<br>N49=+0.247 | -2702.07912348        | 1.235334 | -2700.843790            | 0.9728                | 3.01                                   | 11.9, 15.7,<br>19.5                 | -                                              | 0.37                              | <b>0.71</b>            |
| $\mathbf{1}^{2,2+}$ - $C_{2h}$ | UB3LYP  | DCM     | Min             | Triplet- $^3A_u$  | triplet    | N1=N2=<br>N48=N49=<br>+0.248                       | -2702.07901795        | 1.235311 | -2700.843707            | 2.0204                | 4.28                                   | 13.4, 15.2,<br>19.6                 | <b>0.42</b>                                    | 0.00                              | <b>0.00</b>            |
|                                |         |         |                 | BS-singlet        | triplet    | N1=+0.247<br>N2=-0.247<br>N48=-0.247<br>N49=+0.247 | -2702.07800529        | -        | -                       | 0.9916                | -                                      | -                                   | -                                              | 0.55                              | <b>1.25</b>            |
|                                |         |         |                 | BS-singlet        | BS-singlet | N1=+0.245<br>N2=-0.245<br>N48=-0.245<br>N49=+0.245 | -2702.07806999        | 1.235246 | -2700.842824            | 0.9858                | 6.55                                   | 13.2, 15.1,<br>19.3                 | -                                              | 0.64                              | <b>1.08</b>            |
| $\mathbf{1}^{2,2+}$ - $C_1$    | UB3LYP  | DCM     | TS              | triplet           | triplet    | N1=+0.300<br>N2=+0.300<br>N30=+0.271<br>N31=+0.304 | -2702.02216239        | 1.234283 | -2700.787879            | 2.0219                | 0.45                                   | <b><i>i64.3</i></b> , 8.3,<br>15.6  | <b>35.45</b>                                   | -                                 | -                      |
| $\mathbf{1}^{2,2+}$ - $D_2$    | UM06-2X | DCM     | Min             | Triplet- $^3B_3$  | triplet    | N1=N2=<br>N48=N49=<br>+0.283                       | -2700.93063140        | 1.247812 | -2699.682820            | 2.0242                | 0.04                                   | 9.4, 12.0, 21.5                     | <b>0.00</b>                                    | 0.00                              | <b>0.00</b>            |
|                                |         |         |                 | BS-singlet        | BS-singlet | N1=+0.280<br>N2=-0.280<br>N48=-0.280<br>N49=+0.280 | -2700.92991286        | 1.247994 | -2699.681919            | 0.9994                | 0.24                                   | 10.7, 13.1,<br>22.1                 | -                                              | 0.57                              | <b>1.12</b>            |
| $\mathbf{1}^{2,2+}$ - $C_{2h}$ | UM06-2X | DCM     | Min             | Triplet- $^3A_u$  | triplet    | N1=N2=N48=<br>N49=+0.279                           | -2700.93006467        | 1.247725 | -2699.682340            | 2.0242                | 1.40                                   | 13.9, 15.8,<br>20.7                 | <b>0.30</b>                                    | 0.00                              | <b>0.00</b>            |
|                                |         |         |                 | BS-singlet        | BS-singlet | N1=+0.278<br>N2=-0.278<br>N48=-0.278<br>N49=+0.278 | -2700.92912184        | 1.247428 | -2699.681694            | 1.0049                | 1.73                                   | 13.8, 15.3,<br>20.1                 | -                                              | 0.41                              | <b>0.81</b>            |
| $\mathbf{1}^{2,2+}$ - $C_1$    | UM06-2X | DCM     | TS              | triplet           | triplet    | N1=+0.330<br>N2=+0.255<br>N30=+0.304<br>N31=+0.335 | -2700.8694201         | 1.247100 | -2699.622320            | 2.0253                | 1.43                                   | <b><i>i60.9</i></b> , 12.3,<br>17.9 | <b>37.96</b>                                   | -                                 | -                      |

<sup>a</sup> 1 Hartree = 627.51  $\text{kcal mol}^{-1}$ . <sup>b</sup> In Cartesian coordinates. \* Wavefunction was tested for stability (stable=opt) and was found to be stable. \*\*For transition state  $\mathbf{1}^{2,2+}$ - $C_1$  in the gas phase, singlet ( $\langle S^2 \rangle = 0.0000$ ) wavefunction was found to be unstable; upon reoptimization of the wavefunction and geometry, BSsinglet wavefunction ( $\langle S^2 \rangle = 0.9763$ ), which was found to be stable, was obtained. <sup>c</sup> Following IRC starting from the TS, optimization of one of the structures gave  $C_{2h}$ -symmetric double helicene (see: Table S15 below)

**Table S9.** Spin densities, positive (blue) and negative (green) spin densities shown at the isodensity level of 0.003 electron/Bohr<sup>3</sup> and determining molecular orbital configurations for radical cations  $1a^{+•}$ -C<sub>2h</sub> and -D<sub>2</sub>, and diradical dication  $1a^{2•2+}$ -D<sub>2h</sub> of model bishydrazine **1a** at the UB3LYP/6-31G(d) level in the gas phase.<sup>a</sup>

| 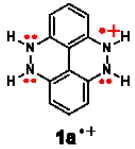<br><b>1a<sup>+•</sup></b>                                                                |                                                                                                                                                                           | <br><b>1a<sup>2•2+</sup></b>                                                            |                                                                                                                                                                           |                                                                                                                                                                              |                                                                                                                                                                             |
|----------------------------------------------------------------------------------------------------------------------------------------------------------------------------|---------------------------------------------------------------------------------------------------------------------------------------------------------------------------|----------------------------------------------------------------------------------------------------------------------------------------------------------------------------|---------------------------------------------------------------------------------------------------------------------------------------------------------------------------|------------------------------------------------------------------------------------------------------------------------------------------------------------------------------|-----------------------------------------------------------------------------------------------------------------------------------------------------------------------------|
| <b>1a<sup>+•</sup>-C<sub>2h</sub></b> (gas phase)                                                                                                                          |                                                                                                                                                                           | <b>1a<sup>+•</sup>-D<sub>2</sub></b> (gas phase)                                                                                                                           |                                                                                                                                                                           | <b>1a<sup>2•2+</sup>-D<sub>2h</sub></b> (triplet, gas phase)                                                                                                                 |                                                                                                                                                                             |
|                                                                                           |                                                                                                                                                                           |                                                                                           |                                                                                                                                                                           |                                                                                           |                                                                                                                                                                             |
| alpha                                                                                                                                                                      | beta                                                                                                                                                                      | alpha                                                                                                                                                                      | beta                                                                                                                                                                      | alpha                                                                                                                                                                        | beta                                                                                                                                                                        |
| <br>Alpha MO (MO = 55; Isovalue = 0.02)<br><b>55 (a<sub>u</sub>) (-0.3244)</b><br>HOMO    | <br>Beta MO (MO = 54; Isovalue = 0.02)<br><b>54 (a<sub>u</sub>) (-0.3093)</b><br>HOMO    | <br>Alpha MO (MO = 55; Isovalue = 0.02)<br><b>55 (a) (-0.3252)</b><br>HOMO                | <br>Beta MO (MO = 54; Isovalue = 0.02)<br><b>54 (a) (-0.3097)</b><br>HOMO                | <br>Alpha MO (MO = 55; Isovalue = 0.02)<br><b>55 (b<sub>2g</sub>) (-0.4799)</b><br>SOMO   | <br>Beta MO (MO = 55; Isovalue = 0.02)<br><b>55 (b<sub>2g</sub>) (-0.3956)</b><br>LUMO   |
| <br>Alpha MO (MO = 54; Isovalue = 0.02)<br><b>54 (a<sub>g</sub>) (-0.3255)</b><br>SOMO   | <br>Beta MO (MO = 55; Isovalue = 0.02)<br><b>55 (a<sub>g</sub>) (-0.2611)</b><br>LUMO   | <br>Alpha MO (MO = 54; Isovalue = 0.02)<br><b>54 (b<sub>2</sub>) (-0.3260)</b><br>SOMO   | <br>Beta MO (MO = 55; Isovalue = 0.02)<br><b>55 (b<sub>2</sub>) (-0.2615)</b><br>LUMO   | <br>Alpha MO (MO = 54; Isovalue = 0.02)<br><b>54 (a<sub>u</sub>) (-0.4888)</b><br>SOMO   | <br>Beta MO (MO = 54; Isovalue = 0.02)<br><b>54 (a<sub>u</sub>) (-0.4107)</b><br>LUMO   |
| <br>Alpha MO (MO = 53; Isovalue = 0.02)<br><b>53 (b<sub>g</sub>) (-0.380)</b><br>SHOMO  | <br>Beta MO (MO = 53; Isovalue = 0.02)<br><b>53 (b<sub>g</sub>) (-0.376)</b><br>SHOMO  | <br>Alpha MO (MO = 53; Isovalue = 0.02)<br><b>53 (b<sub>1</sub>) (-0.380)</b><br>SHOMO  | <br>Beta MO (MO = 53; Isovalue = 0.02)<br><b>53 (b<sub>1</sub>) (-0.377)</b><br>SHOMO  | <br>Alpha MO (MO = 53; Isovalue = 0.02)<br><b>53 (b<sub>1g</sub>) (-0.545)</b><br>HOMO  | <br>Beta MO (MO = 53; Isovalue = 0.02)<br><b>53 (b<sub>1g</sub>) (-0.521)</b><br>HOMO  |
| <br>Alpha MO (MO = 52; Isovalue = 0.02)<br><b>52 (a<sub>g</sub>) (-0.415)</b><br>S2HOMO | <br>Beta MO (MO = 52; Isovalue = 0.02)<br><b>52 (a<sub>g</sub>) (-0.402)</b><br>S2HOMO | <br>Alpha MO (MO = 52; Isovalue = 0.02)<br><b>52 (b<sub>2</sub>) (-0.414)</b><br>S2HOMO | <br>Beta MO (MO = 52; Isovalue = 0.02)<br><b>52 (b<sub>2</sub>) (-0.402)</b><br>S2HOMO | <br>Alpha MO (MO = 52; Isovalue = 0.02)<br><b>52 (b<sub>2g</sub>) (-0.573)</b><br>SHOMO | <br>Beta MO (MO = 52; Isovalue = 0.02)<br><b>52 (b<sub>2g</sub>) (-0.547)</b><br>SHOMO |

<sup>a</sup> MO number (symmetry label) (energy in a.u.) and frontier MO label are given for each MO.

**Table S10.** Spin densities, positive (blue) and negative (green) spin densities shown at the isodensity level of 0.003 electron/Bohr<sup>3</sup> and determining molecular orbital configurations for radical cations **1a**<sup>•+</sup>-C<sub>2</sub> of model bishydrazine **1a** at the UB3LYP/6-31G(d)/IEF-PCM-UFF level in DCM and in water, and for triplet ground state of diradical dication **1a**<sup>2•2+</sup>-D<sub>2h</sub> in water.<sup>a</sup>

| 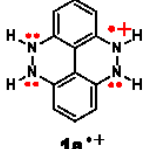<br><b>1a</b> <sup>•+</sup>                                                    |                                                                                                                                                                | <br><b>1a</b> <sup>2•2+</sup>                                                |                                                                                                                                                                 |                                                                                                                                                                             |                                                                                                                                                                            |
|-----------------------------------------------------------------------------------------------------------------------------------------------------------------|----------------------------------------------------------------------------------------------------------------------------------------------------------------|-----------------------------------------------------------------------------------------------------------------------------------------------------------------|-----------------------------------------------------------------------------------------------------------------------------------------------------------------|-----------------------------------------------------------------------------------------------------------------------------------------------------------------------------|----------------------------------------------------------------------------------------------------------------------------------------------------------------------------|
| <b>1a</b> <sup>•+</sup> -C <sub>2</sub> (DCM)                                                                                                                   |                                                                                                                                                                | <b>1a</b> <sup>•+</sup> -C <sub>2</sub> (water)                                                                                                                 |                                                                                                                                                                 | <b>1a</b> <sup>2•2+</sup> -D <sub>2h</sub> (triplet, water)                                                                                                                 |                                                                                                                                                                            |
| alpha                                                                                                                                                           | beta                                                                                                                                                           | alpha                                                                                                                                                           | beta                                                                                                                                                            | alpha                                                                                                                                                                       | beta                                                                                                                                                                       |
|                                                                                |                                                                               |                                                                                |                                                                                |                                                                                          |                                                                                         |
| <br>Alpha MO (MO = 55); Isovalue = 0.02<br><b>55 (a) (-0.20852)</b><br>HOMO   | <br>Beta MO (MO = 54); Isovalue = 0.02<br><b>54 (a) (-0.20298)</b><br>HOMO   | <br>Alpha MO (MO = 55); Isovalue = 0.02<br><b>55 (a) (-0.19744)</b><br>HOMO   | <br>Beta MO (MO = 54); Isovalue = 0.02<br><b>54 (a) (-0.19239)</b><br>HOMO   | <br>Alpha MO (MO = 55); Isovalue = 0.02<br><b>55 (b<sub>2g</sub>) (-0.230)</b><br>SOMO  | <br>Beta MO (MO = 55); Isovalue = 0.02<br><b>55 (b<sub>2g</sub>) (-0.143)</b><br>LUMO  |
| <br>Alpha MO (MO = 54); Isovalue = 0.02<br><b>54 (a) (-0.21810)</b><br>SOMO  | <br>Beta MO (MO = 55); Isovalue = 0.02<br><b>55 (a) (-0.14268)</b><br>LUMO  | <br>Alpha MO (MO = 54); Isovalue = 0.02<br><b>54 (a) (-0.20650)</b><br>SOMO  | <br>Beta MO (MO = 55); Isovalue = 0.02<br><b>55 (a) (-0.13031)</b><br>LUMO  | <br>Alpha MO (MO = 54); Isovalue = 0.02<br><b>54 (a<sub>u</sub>) (-0.241)</b><br>SOMO  | <br>Beta MO (MO = 54); Isovalue = 0.02<br><b>54 (a<sub>u</sub>) (-0.162)</b><br>LUMO  |
| <br>Alpha MO (MO = 53); Isovalue = 0.02<br><b>53 (b) (-0.27250)</b><br>SHOMO | <br>Beta MO (MO = 53); Isovalue = 0.02<br><b>53 (b) (-0.26540)</b><br>SHOMO | <br>Alpha MO (MO = 53); Isovalue = 0.02<br><b>53 (b) (-0.26144)</b><br>SHOMO | <br>Beta MO (MO = 53); Isovalue = 0.02<br><b>53 (b) (-0.25406)</b><br>SHOMO | <br>Alpha MO (MO = 53); Isovalue = 0.02<br><b>53 (b<sub>1g</sub>) (-0.299)</b><br>HOMO | <br>Beta MO (MO = 53); Isovalue = 0.02<br><b>53 (b<sub>1g</sub>) (-0.275)</b><br>HOMO |

<sup>a</sup> Spin density maps, and MO number (symmetry label) (energy in a.u.) and frontier MO label are given for each MO.

**Table S11.** Spin densities, positive (blue) and negative (green) spin densities shown at the isodensity level of 0.002 electron/Bohr<sup>3</sup>, and determining molecular orbital configurations for radical cations  $C_{2h}$ - and  $D_2$ - $1^{+}$  at the UB3LYP/6-31G(d)/IEF-PCM-UFF level in dichloromethane (DCM) and for triplet states of diradical dication  $C_{2h}$ - and  $D_2$ - $1^{2+}$  at the UB3LYP/6-31G(d) level in the gas phase.<sup>a</sup>

| Radical cation                   |                                  |                                  |                                  | Diradical dication (triplet)    |                                 |                                 |                                 |
|----------------------------------|----------------------------------|----------------------------------|----------------------------------|---------------------------------|---------------------------------|---------------------------------|---------------------------------|
| $C_{2h}$ in DCM                  |                                  | $D_2$ in DCM                     |                                  | $C_{2h}$ in the gas phase       |                                 | $D_2$ in the gas phase          |                                 |
| alpha                            | beta                             | alpha                            | beta                             | alpha                           | beta                            | alpha                           | beta                            |
|                                  |                                  |                                  |                                  |                                 |                                 |                                 |                                 |
|                                  |                                  |                                  |                                  |                                 |                                 |                                 |                                 |
| 243 ( $a_g$ , -0.20663)<br>SOMO  | 243 ( $a_g$ , -0.16110)<br>LUMO  | 243 ( $b_3$ , -0.20462)<br>SOMO  | 243 ( $b_3$ , -0.15929)<br>LUMO  | 243 ( $a_g$ , -0.37583)<br>SOMO | 243 ( $a_g$ , -0.31840)<br>LUMO | 243 ( $b_3$ , -0.37434)<br>SOMO | 243 ( $b_3$ , -0.31644)<br>LUMO |
|                                  |                                  |                                  |                                  |                                 |                                 |                                 |                                 |
| 242 ( $a_u$ , -0.20934)<br>HOMO  | 242 ( $a_u$ , -0.19591)<br>HOMO  | 242 ( $a$ , -0.20949)<br>HOMO    | 242 ( $a$ , -0.19533)<br>HOMO    | 242 ( $a_u$ , -0.37976)<br>SOMO | 242 ( $a_u$ , -0.32623)<br>LUMO | 242 ( $a$ , -0.37979)<br>SOMO   | 242 ( $a$ , -0.32529)<br>LUMO   |
|                                  |                                  |                                  |                                  |                                 |                                 |                                 |                                 |
| 241 ( $b_g$ , -0.23824)<br>SHOMO | 241 ( $b_g$ , -0.23362)<br>SHOMO | 241 ( $b_1$ , -0.24063)<br>SHOMO | 241 ( $b_1$ , -0.23586)<br>SHOMO | 241 ( $b_g$ , -0.40078)<br>HOMO | 241 ( $b_g$ , -0.38872)<br>HOMO | 241 ( $b_1$ , -0.40206)<br>HOMO | 241 ( $b_1$ , -0.39034)<br>HOMO |

<sup>a</sup> Spin density maps, and MO number (symmetry label) (energy in a.u.) and frontier MO label are given for each MO.

**Table S12.** Selected bond lengths (Å) in conjoined [5]helicenes:  $D_2$ -symmetric ( $P,P$ )-**1**- $D_2$ ,  $C_{2h}$ -symmetric (*meso*) ( $P,M$ )-**1**- $C_{2h}$ , the corresponding radical cations and diradical dication computed at the B3LYP/6-31G(d)+ZPVE (gas phase) and B3LYP/6-31G(d)/IEF-PCM-UFF +ZPVE (DCM) levels of theory.

| Compound                                                  | Bond length (Å)      |        |                      |        |
|-----------------------------------------------------------|----------------------|--------|----------------------|--------|
|                                                           | Gas Phase            |        | DCM                  |        |
|                                                           | C23-C46 <sup>a</sup> | N1-N49 | C23-C46 <sup>a</sup> | N1-N49 |
| ( $P,P$ )- <b>1</b> - $D_2$                               | 1.446                | 1.420  | 1.446                | 1.420  |
| ( $P,M$ )- <b>1</b> - $C_{2h}$                            | 1.448                | 1.419  | 1.448                | 1.419  |
| ( $P,P$ )- <b>1</b> <sup>·+</sup> - $D_2$                 | 1.421                | 1.399  | 1.420                | 1.398  |
| ( $P,M$ )- <b>1</b> <sup>·+</sup> - $C_{2h}$              | 1.423                | 1.397  | 1.421                | 1.396  |
| ( $P,P$ )- <b>1</b> <sup>2,2+</sup> - $D_2$ triplet       | 1.422                | 1.381  | 1.419                | 1.378  |
| ( $P,M$ )- <b>1</b> <sup>2,2+</sup> - $C_{2h}$ triplet    | 1.423                | 1.381  | 1.420                | 1.378  |
| ( $P,P$ )- <b>1</b> <sup>2,2+</sup> - $D_2$ BS singlet    | 1.418                | 1.381  | 1.414                | 1.378  |
| ( $P,M$ )- <b>1</b> <sup>2,2+</sup> - $C_{2h}$ BS singlet | 1.420                | 1.380  | 1.416                | 1.378  |

<sup>a</sup> Center C-C bond.

**Table S13.** B3LYP/EPR-II  $D$ -tensors and largest component of the  $^{14}\text{N}$   $A$ -tensors for triplet states of diradical dication. Coordinates  $x$ ,  $y$ ,  $z$  define molecule orientation in ORCA.<sup>a</sup>

| Diradical dication                                                                                                                    | $D$ (cm <sup>-1</sup> ) | $E$ (cm <sup>-1</sup> ) | $D$ -tensor (cm <sup>-1</sup> ) |          |          | $A_{ZZ}$ (MHz) |         |         |         |         |
|---------------------------------------------------------------------------------------------------------------------------------------|-------------------------|-------------------------|---------------------------------|----------|----------|----------------|---------|---------|---------|---------|
|                                                                                                                                       |                         |                         | $D_{YY}$                        | $D_{XX}$ | $D_{ZZ}$ | N1             | N2      | N3      | N4      |         |
| 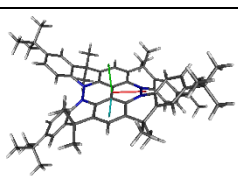<br>( $P,P$ )- <b>1</b> <sup>2,2+</sup> - $D_2$    | +0.01316                | +0.00367                |                                 | -0.00806 | +0.00072 | +0.00877       | +20.899 | +20.899 | +20.899 | +20.899 |
|                                                                                                                                       |                         |                         | x                               | -1.0000  | 0.0000   | 0.0000         | -0.2860 | -0.2860 | +0.2860 | +0.2860 |
|                                                                                                                                       |                         |                         | y                               | 0.0000   | 0.0000   | +1.0000        | +0.9160 | +0.9160 | +0.9160 | +0.9160 |
|                                                                                                                                       |                         |                         | z                               | 0.0000   | +1.0000  | 0.0000         | -0.2860 | +0.2860 | +0.2860 | -0.2860 |
| <br>( $P,M$ )- <b>1</b> <sup>2,2+</sup> - $C_{2h}$ | +0.01354                | +0.00375                |                                 | -0.00826 | -0.00077 | +0.00903       | +20.602 | +20.602 | +20.602 | +20.602 |
|                                                                                                                                       |                         |                         | x                               | 0.0000   | +0.8915  | +0.4530        | -0.2065 | -0.2065 | -0.2065 | -0.2065 |
|                                                                                                                                       |                         |                         | y                               | 0.0000   | -0.4530  | +0.8915        | -0.9331 | -0.9331 | -0.9331 | -0.9331 |
|                                                                                                                                       |                         |                         | z                               | +1.0000  | 0.0000   | 0.0000         | -0.2943 | +0.2943 | -0.2943 | +0.2943 |

<sup>a</sup>  $x$ ,  $y$ , and  $z$  axes for ( $P,P$ )-**1**<sup>2,2+</sup>- $D_2$  are shown in red, green, and blue, respectively. Note that the largest components of  $D$ - and  $A$ -tensors, i.e.,  $D_{ZZ}$  and  $A_{ZZ}$ , are oriented along  $y$ -axis of the molecules, which coincides with the  $2p_\pi$  orbital axis. Computed components of  $g$ -matrix for ( $P,P$ )-**1**<sup>2,2+</sup>- $D_2$ :  $g_{\text{iso}} = (g_{ZZ} + g_{YY} + g_{XX})/3 = (2.00238 + 2.00334 + 2.00366)/3 = 2.0031$  and for ( $P,M$ )-**1**<sup>2,2+</sup>- $C_{2h}$ :  $g_{\text{iso}} = (g_{ZZ} + g_{YY} + g_{XX})/3 = (2.00238 + 2.00332 + 2.00368)/3 = 2.0031$ . Smallest  $g$ -tensor component,  $g_{ZZ}$ , is oriented along the  $y$ -axis of the molecules, which coincides with the  $2p_\pi$  orbital axis, as expected.

**Table S14.** Internal reaction coordinate (IRC) from  $C_1$ -symmetric TS to  $D_2$ - and  $C_{2h}$ -symmetric neutral conjoined helicene in DCM at the M06-2X/6-31G(d) level. Following IRC starting from the TS, re-optimization with no symmetry constraints of one of the structures (IRC#6 with IRC Reaction Coordinate of +0.1019) gave  $C_{2h}$ -symmetric minimum with total energy of -2701.31593888 a.u. (RMS gradient norm of  $1.8 \times 10^{-7}$  a.u.).

Reaction path calculation complete.

Energies reported relative to the TS energy of -2701.243052

-----  
 Summary of reaction path following  
 -----

|   | Energy   | Rx Coord |
|---|----------|----------|
| 1 | -0.00003 | -0.11248 |
| 2 | -0.00003 | -0.11240 |
| 3 | -0.00003 | -0.10850 |
| 4 | -0.00002 | -0.10337 |
| 5 | 0.00000  | 0.00000  |
| 6 | -0.00003 | 0.10190  |

-----  
 Total number of points: 5

**Table S15.** Internal reaction coordinate (IRC) from  $C_1$ -symmetric TS to  $D_2$ - and  $C_{2h}$ -symmetric triplet diradical dication of conjoined helicene in the gas phase at the UB3LYP/6-31G(d) level. Following IRC starting from the TS, optimization of one of the structures (IRC#1 with IRC Reaction Coordinate of -0.10748) gave  $C_{2h}$ -symmetric minimum with total energy of -2702.34706058 a.u. (RMS gradient norm of  $2.2 \times 10^{-7}$  a.u.).

Reaction path calculation complete.

Energies reported relative to the TS energy of -2701.879557

-----  
 Summary of reaction path following  
 -----

|   | Energy   | Rx Coord |
|---|----------|----------|
| 1 | -0.00002 | -0.10748 |
| 2 | -0.00002 | -0.10350 |
| 3 | -0.00002 | -0.09707 |
| 4 | -0.00002 | -0.09654 |
| 5 | 0.00000  | 0.00000  |
| 6 | -0.00002 | 0.09888  |
| 7 | -0.00002 | 0.10011  |
| 8 | -0.00002 | 0.10223  |

-----  
 Total number of points: 7

**Table S16.** Structure drawing of simplified diradical dication of conjoined [5]helicene **1b**<sup>2,2+</sup>, in which *tert*-butyl and *gem*-dimethyl groups were replaced with hydrogens. Triplet states of diradical dications of conjoined [5]helicenes: *D*<sub>2</sub>-symmetric (*P,P*)-**1b**<sup>2,2+</sup>-*D*<sub>2</sub>, *C*<sub>2h</sub>-symmetric (*meso*) (*P,M*)-**1b**<sup>2,2+</sup>-*C*<sub>2h</sub>, and *C*<sub>1</sub>-symmetric transition state TS-(*P*)-**1b**<sup>2,2+</sup>-*C*<sub>1</sub>: UB3LYP/6-31G(d)+ZPVE, ROMP2/6-31G(d)//UB3LYP/6-31G(d), UMP2/6-31G(d)//UB3LYP/6-31G(d), and UMP3/6-31G(d)//UB3LYP/6-31G(d) energies (hartree), lowest vibrational frequencies (cm<sup>-1</sup>), RMS gradient norms (a.u.) in Cartesian coordinates, relative energies for triplet states prior to ZPVE correction ( $\Delta E$ , kcal mol<sup>-1</sup>).<sup>a</sup>

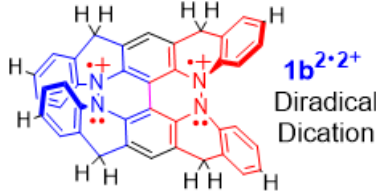

| Level of theory                                 | Point group            | Point on PES | El. State                          | $\langle S^2 \rangle$ | $E^\circ$        | ZPVE     | $E^\circ + \text{ZPVE}$ | RMS gradient norm <sup>b</sup> ( $\times 10^{-6}$ ) | Lowest vibrational frequencies | $\mu$ | $\Delta E^c$ |
|-------------------------------------------------|------------------------|--------------|------------------------------------|-----------------------|------------------|----------|-------------------------|-----------------------------------------------------|--------------------------------|-------|--------------|
| UB3LYP/6-31G(d)<br>+ZPVE                        | <i>D</i> <sub>2</sub>  | Min          | <sup>3</sup> <i>B</i> <sub>3</sub> | 2.0219                | -1758.40018832   | 0.557669 | -1757.842519            | 1.99                                                | 26.6, 33.2, 55.2               | 0.00  | 0.00         |
|                                                 | <i>C</i> <sub>2h</sub> | Min          | <sup>3</sup> <i>A</i> <sub>u</sub> | 2.0215                | -1758.39891208   | 0.557788 | -1757.841124            | 3.41                                                | 26.7, 32.7, 50.9               | 0.00  | 0.80         |
|                                                 | <i>C</i> <sub>1</sub>  | TS           | <sup>3</sup> <i>A</i>              | 2.0226                | -1758.33941396   | 0.556858 | -1757.782556            | 0.12                                                | <b>168.4</b> , 30.4, 37.3      | 0.80  | 38.14        |
| ROMP2/6-31G(d)<br>//UB3LYP/6-31G(d)             | <i>D</i> <sub>2</sub>  | Min          | <sup>3</sup> <i>B</i> <sub>3</sub> | 2.00                  | -1752.91308755   | -        | -                       | -                                                   | -                              | 0.00  | 0.00         |
|                                                 | <i>C</i> <sub>2h</sub> | Min          | <sup>3</sup> <i>A</i> <sub>u</sub> | 2.00                  | -1752.91310985   | -        | -                       | -                                                   | -                              | 0.00  | -0.01        |
|                                                 | <i>C</i> <sub>1</sub>  | TS           | <sup>3</sup> <i>A</i>              | 2.00                  | -1752.85222125   | -        | -                       | -                                                   | -                              | 0.94  | 38.19        |
| UMP2/6-31G(d)<br>//UB3LYP/6-31G(d) <sup>d</sup> | <i>D</i> <sub>2</sub>  | Min          | <sup>3</sup> <i>B</i> <sub>3</sub> | 4.28                  | -1752.6927878034 | -        | -                       | -                                                   | -                              | 0.00  | 0.00         |
|                                                 | <i>C</i> <sub>2h</sub> | Min          | <sup>3</sup> <i>A</i> <sub>u</sub> | 4.28                  | -1752.6922730086 | -        | -                       | -                                                   | -                              | 4.66  | 0.32         |
|                                                 | <i>C</i> <sub>1</sub>  | TS           | <sup>3</sup> <i>A</i>              | 4.45                  | -1752.6183910797 | -        | -                       | -                                                   | -                              | 0.00  | 46.68        |
| UMP3/6-31G(d)<br>//UB3LYP/6-31G(d) <sup>d</sup> | <i>C</i> <sub>2</sub>  | Min          | <sup>3</sup> <i>B</i> <sub>3</sub> | -                     | -1752.84698830   | -        | -                       | -                                                   | -                              | 0.00  | 0.00         |
|                                                 | <i>D</i> <sub>2</sub>  | Min          | <sup>3</sup> <i>A</i> <sub>u</sub> | -                     | -1752.84590140   | -        | -                       | -                                                   | -                              | 0.00  | 0.68         |

<sup>a</sup> 1 Hartree = 627.51 kcal mol<sup>-1</sup>. <sup>b</sup> In Cartesian coordinates. <sup>c</sup> All relative energies are listed without ZPVE correction; at the UB3LYP/6-31G(d) + ZPVE level,  $\Delta E = 0.00, 0.88, 37.62$  kcal mol<sup>-1</sup> for **1b**<sup>2,2+</sup>. <sup>d</sup> Computations at UMP<sub>n</sub> (*n* = 2 and 3) suffer from inadequate starting UHF wf, for which  $\langle S^2 \rangle = 4.96$  (after 12.9), 4.95 (after 12.9), 5.16 (after 14.1) for *D*<sub>2</sub>-, *C*<sub>2h</sub>-, *C*<sub>1</sub>-symmetric **1b**<sup>2,2+</sup>. Consequently, the barrier for racemization of 46.7 kcal mol<sup>-1</sup> at the UMP2/6-31G(d)//UB3LYP/6-31G(d) level is overestimated compared to 38.1 kcal mol<sup>-1</sup> at the UB3LYP/6-31G(d) level or 37.6 kcal mol<sup>-1</sup> at the UB3LYP/6-31G(d)+ZPVE level.

## 2. <sup>1</sup>H NMR Spectra of crude mixtures and purified 1-D<sub>2</sub>

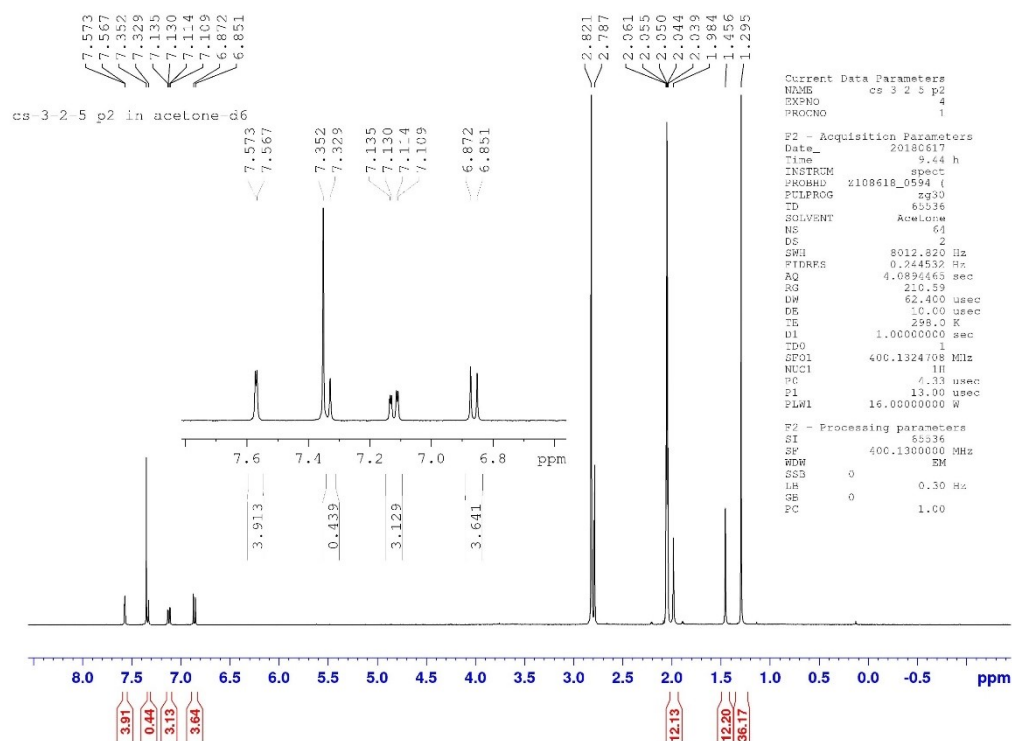

Fig. S37. <sup>1</sup>H NMR spectrum (400 MHz, acetone-d<sub>6</sub>, CS-3-2-5 p2) of the sample obtained after purification.

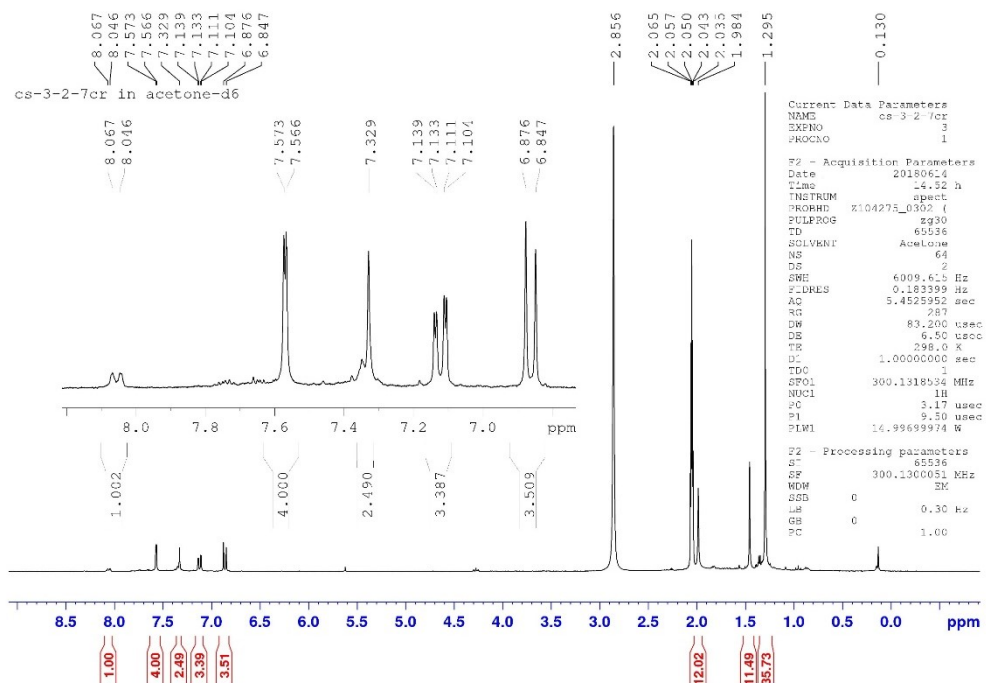

Fig. S38. <sup>1</sup>H NMR spectrum (300 MHz, acetone-d<sub>6</sub>, CS-3-2-7cr) of the crude mixture obtained after quench.



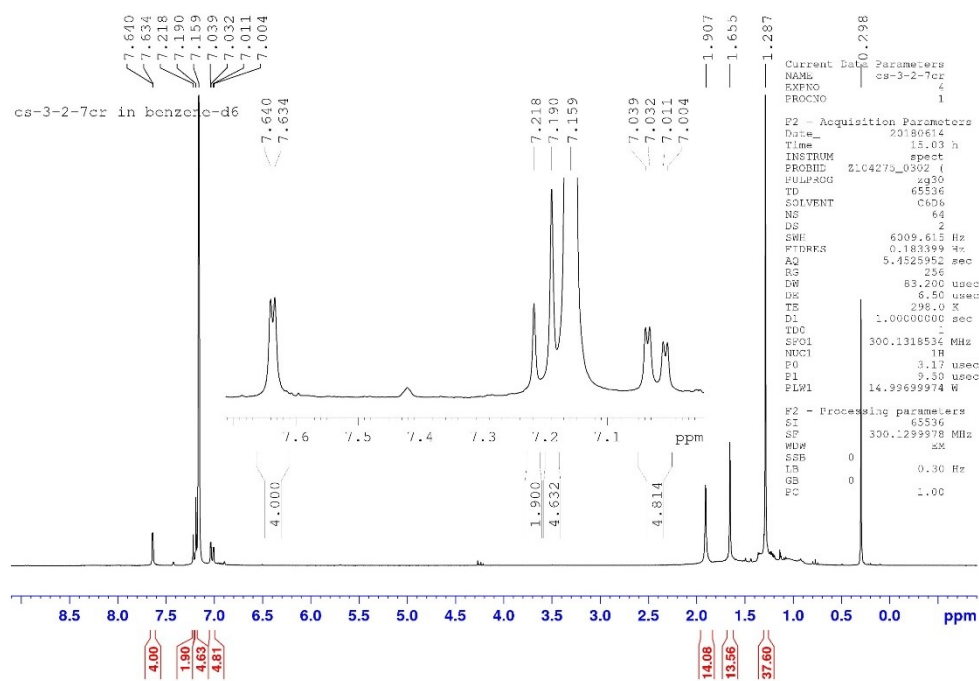

**Fig. S39.**  $^1\text{H}$  NMR spectrum (300 MHz, benzene- $d_6$ , CS-3-2-7cr) of the crude mixture obtained after quench.

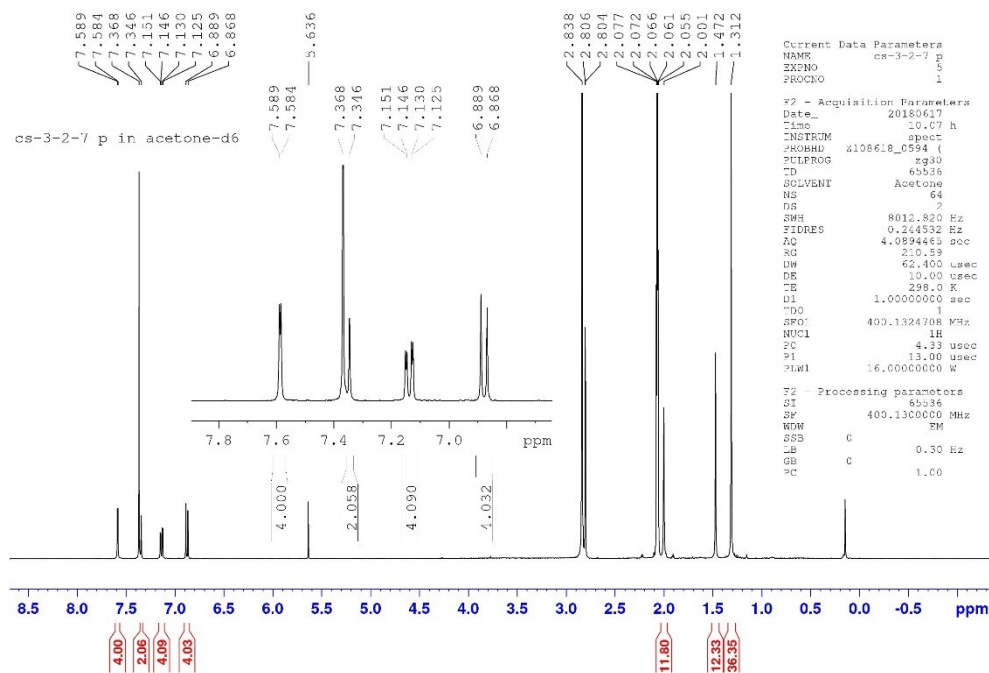

**Fig. S40.**  $^1\text{H}$  NMR spectrum (400 MHz, acetone- $d_6$ , CS-3-2-7p) of the sample obtained after purification

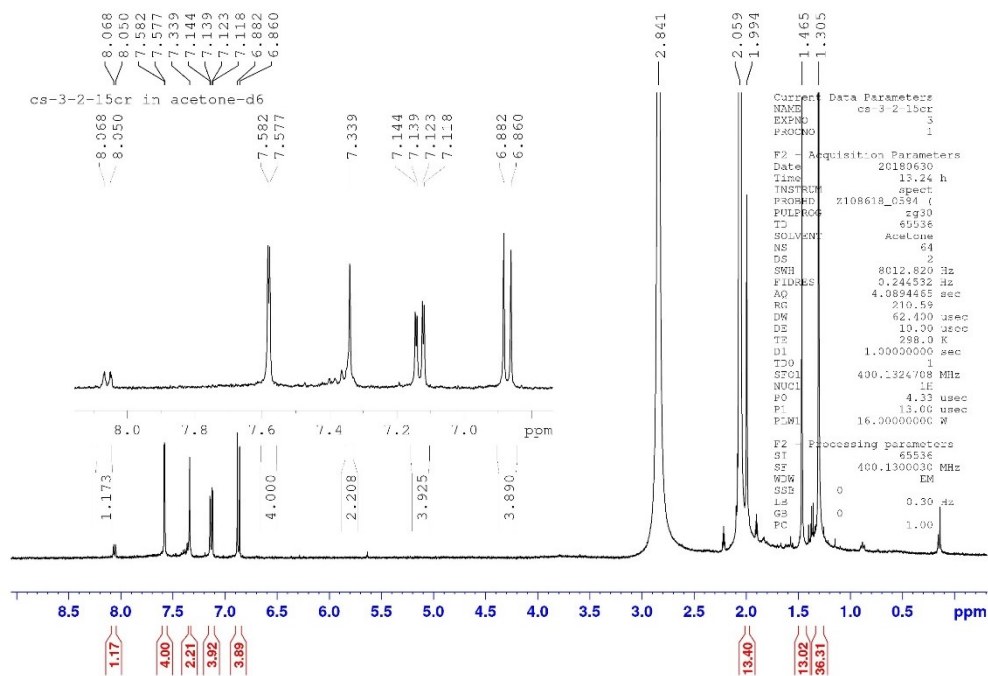

**Fig. S41.**  $^1\text{H}$  NMR spectrum (400 MHz, acetone- $d_6$ , CS-3-2-15cr) of the crude mixture obtained after quench.

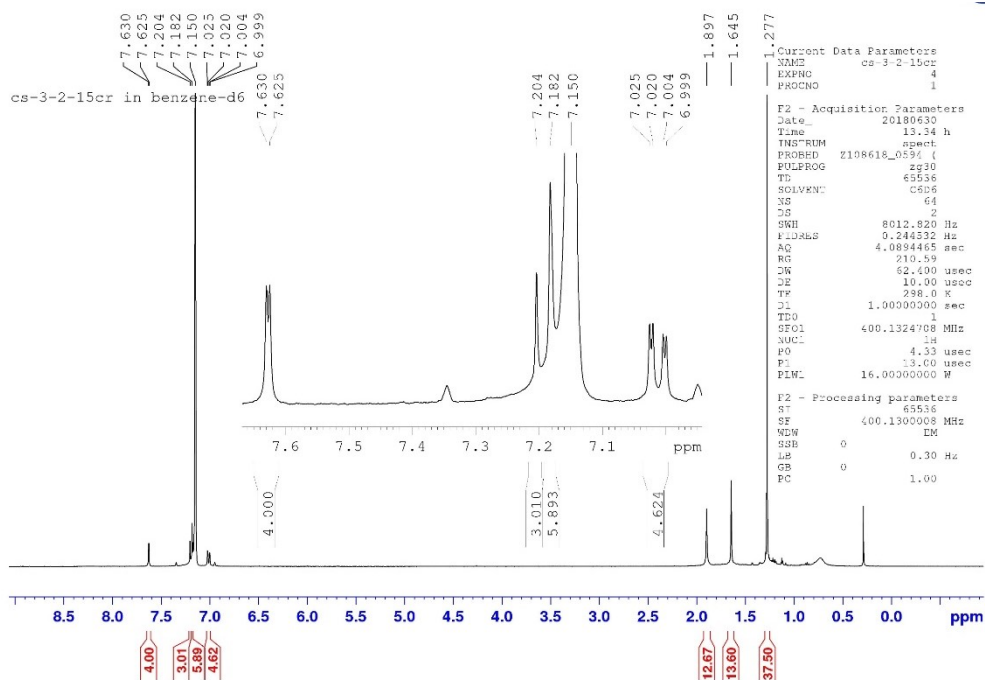

**Fig. S42.**  $^1\text{H}$  NMR spectrum (400 MHz, benzene- $d_6$ , CS-3-2-15cr) of the crude mixture obtained after quench.

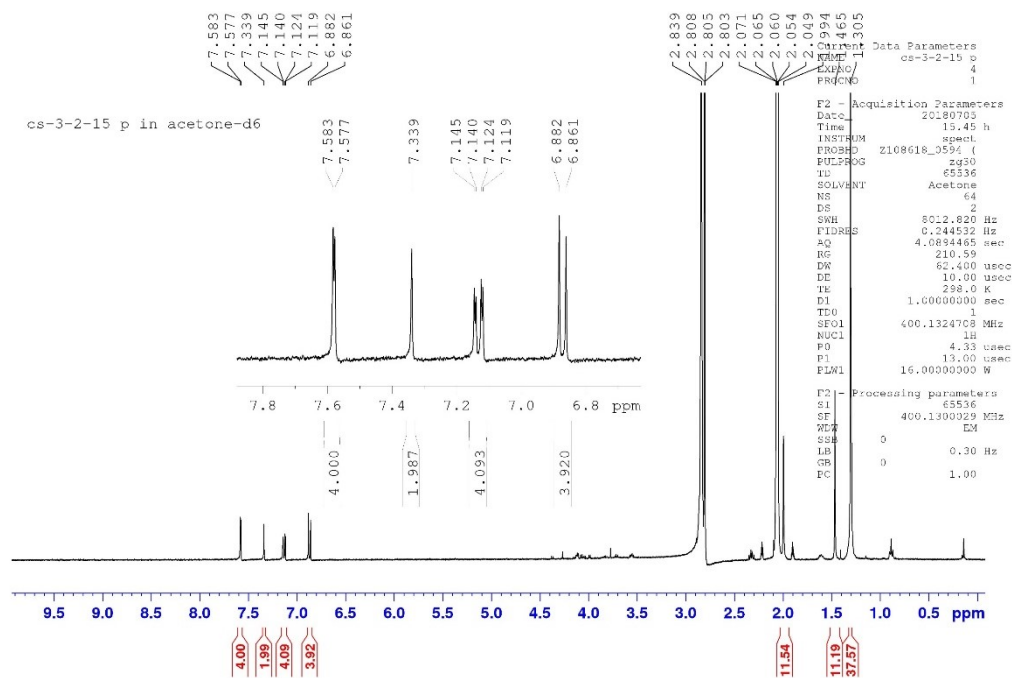

Fig. S43. <sup>1</sup>H NMR spectrum (400 MHz, acetone-*d*<sub>6</sub>, CS-3-2-15p) of the sample obtained after purification.

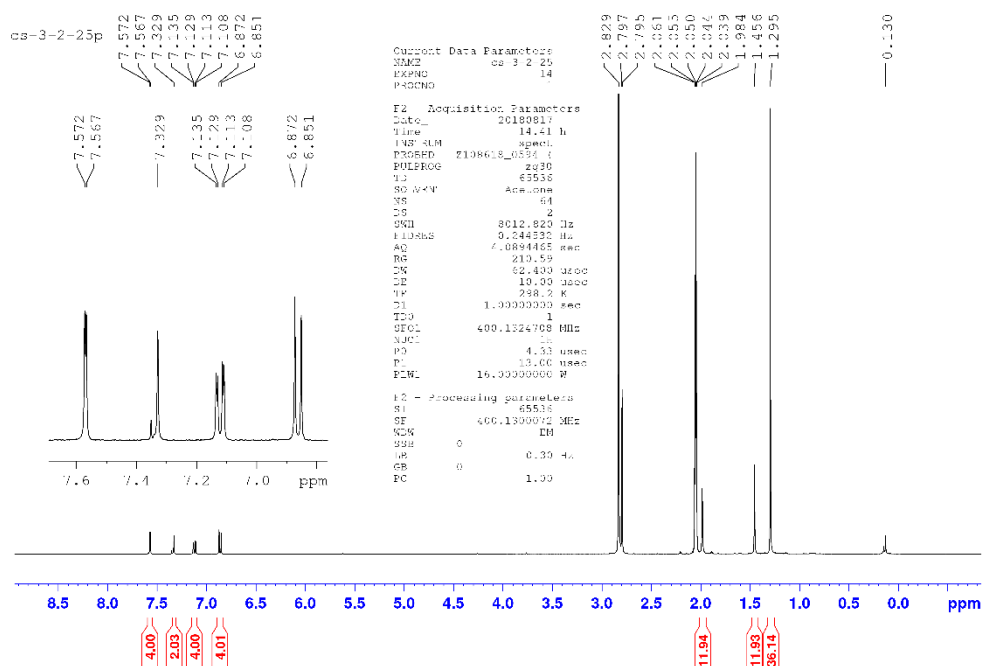

Fig. S44. <sup>1</sup>H NMR spectrum (400 MHz, acetone-*d*<sub>6</sub>, CS-3-2-25p) of the sample obtained after purification.

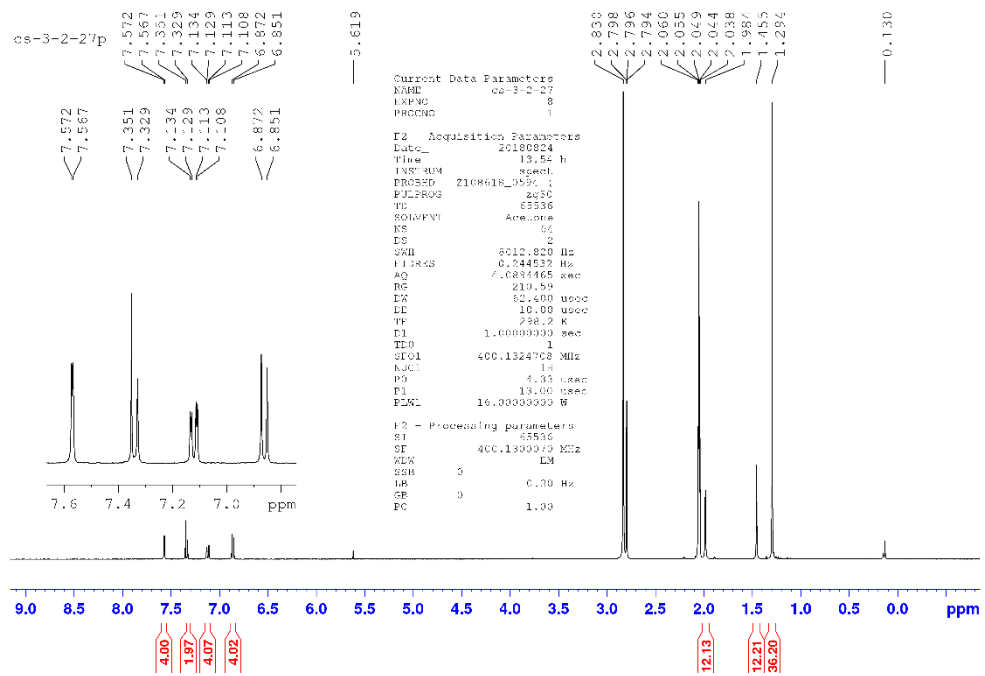

Fig. S45. <sup>1</sup>H NMR spectrum (400 MHz, acetone-*d*<sub>6</sub>, CS-3-2-27p) of the sample obtained after purification.

### 3. Outputs of DFT Calculations for Conjoined [5]Helicenes: Neutrals, Radical Cations, and Diradical Dications.

#### Conjoined [5]helicene, chiral, $D_2$ at B3LYP/6-31G(d) in the gas phase

Stoichiometry C64H74N4  
 Framework group D2[C2(HCC.CCH),X(C60H72N4)]  
 Deg. of freedom 105  
 Full point group D2  
 Largest Abelian subgroup D2 NOP 4  
 Largest concise Abelian subgroup D2 NOP 4  
 Standard orientation:

| Center Number | Atomic Number | Atomic Type | Coordinates (Angstroms) |           |           |
|---------------|---------------|-------------|-------------------------|-----------|-----------|
|               |               |             | X                       | Y         | Z         |
| 1             | 7             | 0           | 2.429067                | 0.086661  | 0.704861  |
| 2             | 7             | 0           | -2.429067               | -0.086661 | 0.704861  |
| 3             | 6             | 0           | 5.348004                | 2.637065  | 2.446818  |
| 4             | 6             | 0           | 4.457145                | 1.868688  | 3.216583  |
| 5             | 1             | 0           | 4.519465                | 1.936987  | 4.296433  |
| 6             | 6             | 0           | 3.505185                | 1.012098  | 2.664137  |
| 7             | 6             | 0           | 2.596300                | 0.102181  | 3.512338  |
| 8             | 6             | 0           | 1.231797                | 0.050191  | 2.817599  |
| 9             | 6             | 0           | 0.000000                | 0.000000  | 3.481829  |
| 10            | 1             | 0           | 0.000000                | 0.000000  | 4.563780  |
| 11            | 6             | 0           | -1.231797               | -0.050191 | 2.817599  |
| 12            | 6             | 0           | -2.596300               | -0.102181 | 3.512338  |
| 13            | 6             | 0           | -3.505185               | -1.012098 | 2.664137  |
| 14            | 6             | 0           | -4.457145               | -1.868688 | 3.216583  |
| 15            | 1             | 0           | -4.519465               | -1.936987 | 4.296433  |
| 16            | 6             | 0           | -5.348004               | -2.637065 | 2.446818  |
| 17            | 6             | 0           | -5.251601               | -2.511136 | 1.058603  |
| 18            | 1             | 0           | -5.913605               | -3.069518 | 0.406098  |
| 19            | 6             | 0           | -4.302720               | -1.678427 | 0.465269  |
| 20            | 1             | 0           | -4.249182               | -1.606300 | -0.613160 |
| 21            | 6             | 0           | -3.417981               | -0.944596 | 1.254998  |
| 22            | 6             | 0           | -1.209343               | -0.018176 | 1.416442  |
| 23            | 6             | 0           | 0.000000                | 0.000000  | 0.722781  |
| 24            | 6             | 0           | 1.209343                | 0.018176  | 1.416442  |
| 25            | 6             | 0           | 3.417981                | 0.944596  | 1.254998  |
| 26            | 6             | 0           | 4.302720                | 1.678427  | 0.465269  |
| 27            | 6             | 0           | 5.251601                | 2.511136  | 1.058603  |
| 28            | 1             | 0           | 5.913605                | 3.069518  | 0.406098  |
| 29            | 6             | 0           | 3.199135                | -1.332446 | 3.539025  |
| 30            | 1             | 0           | 3.254174                | -1.763102 | 2.535936  |
| 31            | 1             | 0           | 2.573891                | -1.992077 | 4.152118  |
| 32            | 1             | 0           | 4.209355                | -1.314519 | 3.964207  |
| 33            | 6             | 0           | 2.482288                | 0.591425  | 4.966725  |
| 34            | 1             | 0           | 2.074738                | 1.606213  | 5.026016  |
| 35            | 1             | 0           | 3.459772                | 0.581163  | 5.458262  |
| 36            | 1             | 0           | 1.838266                | -0.074839 | 5.548613  |
| 37            | 6             | 0           | -2.482288               | -0.591425 | 4.966725  |
| 38            | 1             | 0           | -2.074738               | -1.606213 | 5.026016  |
| 39            | 1             | 0           | -3.459772               | -0.581163 | 5.458262  |
| 40            | 1             | 0           | -1.838266               | 0.074839  | 5.548613  |
| 41            | 6             | 0           | -3.199135               | 1.332446  | 3.539025  |
| 42            | 1             | 0           | -3.254174               | 1.763102  | 2.535936  |
| 43            | 1             | 0           | -2.573891               | 1.992077  | 4.152118  |
| 44            | 1             | 0           | -4.209355               | 1.314519  | 3.964207  |
| 45            | 1             | 0           | -4.249182               | 1.606300  | -0.613160 |
| 46            | 6             | 0           | 0.000000                | 0.000000  | -0.722781 |
| 47            | 6             | 0           | -1.209343               | 0.018176  | -1.416442 |
| 48            | 7             | 0           | -2.429067               | 0.086661  | -0.704861 |
| 49            | 7             | 0           | 2.429067                | -0.086661 | -0.704861 |
| 50            | 6             | 0           | 1.209343                | -0.018176 | -1.416442 |
| 51            | 6             | 0           | -1.231797               | 0.050191  | -2.817599 |
| 52            | 6             | 0           | 1.231797                | -0.050191 | -2.817599 |
| 53            | 6             | 0           | 0.000000                | 0.000000  | -3.481829 |
| 54            | 1             | 0           | 0.000000                | 0.000000  | -4.563780 |
| 55            | 6             | 0           | 2.596300                | -0.102181 | -3.512338 |
| 56            | 6             | 0           | -2.596300               | 0.102181  | -3.512338 |
| 57            | 6             | 0           | 3.505185                | -1.012098 | -2.664137 |
| 58            | 6             | 0           | -3.505185               | 1.012098  | -2.664137 |
| 59            | 6             | 0           | -3.417981               | 0.944596  | -1.254998 |
| 60            | 6             | 0           | 3.417981                | -0.944596 | -1.254998 |
| 61            | 6             | 0           | -4.457145               | 1.868688  | -3.216583 |
| 62            | 1             | 0           | -4.519465               | 1.936987  | -4.296433 |
| 63            | 6             | 0           | 4.457145                | -1.868688 | -3.216583 |
| 64            | 1             | 0           | 4.519465                | -1.936987 | -4.296433 |
| 65            | 6             | 0           | 5.348004                | -2.637065 | -2.446818 |
| 66            | 6             | 0           | 5.251601                | -2.511136 | -1.058603 |
| 67            | 1             | 0           | 5.913605                | -3.069518 | -0.406098 |
| 68            | 6             | 0           | 4.302720                | -1.678427 | -0.465269 |
| 69            | 1             | 0           | 4.249182                | -1.606300 | 0.613160  |
| 70            | 6             | 0           | -5.348004               | 2.637065  | -2.446818 |
| 71            | 6             | 0           | -5.251601               | 2.511136  | -1.058603 |
| 72            | 6             | 0           | -4.302720               | 1.678427  | -0.465269 |
| 73            | 1             | 0           | -4.249182               | 1.606300  | 0.613160  |
| 74            | 1             | 0           | -5.913605               | 3.069518  | -0.406098 |
| 75            | 6             | 0           | -3.199135               | -1.332446 | -3.539025 |
| 76            | 1             | 0           | -3.254174               | -1.763102 | -2.535936 |

|     |   |   |           |           |           |
|-----|---|---|-----------|-----------|-----------|
| 77  | 1 | 0 | -4.209355 | -1.314519 | -3.964207 |
| 78  | 1 | 0 | -2.573891 | -1.992077 | -4.152118 |
| 79  | 6 | 0 | -2.482288 | 0.591425  | -4.966725 |
| 80  | 1 | 0 | -2.074738 | 1.606213  | -5.026016 |
| 81  | 1 | 0 | -1.838266 | -0.074839 | -5.548613 |
| 82  | 1 | 0 | -3.459772 | 0.581163  | -5.458262 |
| 83  | 6 | 0 | 2.482288  | -0.591425 | -4.966725 |
| 84  | 1 | 0 | 2.074738  | -1.606213 | -5.026016 |
| 85  | 1 | 0 | 1.838266  | 0.074839  | -5.548613 |
| 86  | 1 | 0 | 3.459772  | -0.581163 | -5.458262 |
| 87  | 6 | 0 | 3.199135  | 1.332446  | -3.539025 |
| 88  | 1 | 0 | 2.573891  | 1.992077  | -4.152118 |
| 89  | 1 | 0 | 3.254174  | 1.763102  | -2.535936 |
| 90  | 1 | 0 | 4.209355  | 1.314519  | -3.964207 |
| 91  | 6 | 0 | 6.373718  | -3.550847 | -3.142267 |
| 92  | 6 | 0 | -6.373718 | 3.550847  | -3.142267 |
| 93  | 6 | 0 | -6.373718 | -3.550847 | 3.142267  |
| 94  | 6 | 0 | 6.373718  | 3.550847  | 3.142267  |
| 95  | 6 | 0 | 5.634695  | -4.586277 | -4.023118 |
| 96  | 1 | 0 | 5.028376  | -4.104645 | -4.797648 |
| 97  | 1 | 0 | 6.353988  | -5.244886 | -4.525746 |
| 98  | 1 | 0 | 4.967460  | -5.210329 | -3.417767 |
| 99  | 6 | 0 | 7.309650  | -2.699524 | -4.033046 |
| 100 | 1 | 0 | 8.044666  | -3.338571 | -4.538224 |
| 101 | 1 | 0 | 6.754235  | -2.156691 | -4.805357 |
| 102 | 1 | 0 | 7.855070  | -1.961565 | -3.433717 |
| 103 | 6 | 0 | 7.245550  | -4.320428 | -2.131895 |
| 104 | 1 | 0 | 7.827633  | -3.643655 | -1.496207 |
| 105 | 1 | 0 | 6.642342  | -4.965175 | -1.482564 |
| 106 | 1 | 0 | 7.954676  | -4.961414 | -2.668176 |
| 107 | 6 | 0 | -7.245550 | 4.320428  | -2.131895 |
| 108 | 1 | 0 | -7.827633 | 3.643655  | -1.496207 |
| 109 | 1 | 0 | -6.642342 | 4.965175  | -1.482564 |
| 110 | 1 | 0 | -7.954676 | 4.961414  | -2.668176 |
| 111 | 6 | 0 | -5.634695 | 4.586277  | -4.023118 |
| 112 | 1 | 0 | -4.967460 | 5.210329  | -3.417767 |
| 113 | 1 | 0 | -5.028376 | 4.104645  | -4.797648 |
| 114 | 1 | 0 | -6.353988 | 5.244886  | -4.525746 |
| 115 | 6 | 0 | -7.309650 | 2.699524  | -4.033046 |
| 116 | 1 | 0 | -6.754235 | 2.156691  | -4.805357 |
| 117 | 1 | 0 | -7.855070 | 1.961565  | -3.433717 |
| 118 | 1 | 0 | -8.044666 | 3.338571  | -4.538224 |
| 119 | 6 | 0 | -5.634695 | -4.586277 | 4.023118  |
| 120 | 1 | 0 | -5.028376 | -4.104645 | 4.797648  |
| 121 | 1 | 0 | -6.353988 | -5.244886 | 4.525746  |
| 122 | 1 | 0 | -4.967460 | -5.210329 | 3.417767  |
| 123 | 6 | 0 | -7.245550 | -4.320428 | 2.131895  |
| 124 | 1 | 0 | -7.827633 | -3.643655 | 1.496207  |
| 125 | 1 | 0 | -6.642342 | -4.965175 | 1.482564  |
| 126 | 1 | 0 | -7.954676 | -4.961414 | 2.668176  |
| 127 | 6 | 0 | -7.309650 | -2.699524 | 4.033046  |
| 128 | 1 | 0 | -6.754235 | -2.156691 | 4.805357  |
| 129 | 1 | 0 | -7.855070 | -1.961565 | 3.433717  |
| 130 | 1 | 0 | -8.044666 | -3.338571 | 4.538224  |
| 131 | 6 | 0 | 7.309650  | 2.699524  | 4.033046  |
| 132 | 1 | 0 | 8.044666  | 3.338571  | 4.538224  |
| 133 | 1 | 0 | 6.754235  | 2.156691  | 4.805357  |
| 134 | 1 | 0 | 7.855070  | 1.961565  | 3.433717  |
| 135 | 6 | 0 | 7.245550  | 4.320428  | 2.131895  |
| 136 | 1 | 0 | 7.827633  | 3.643655  | 1.496207  |
| 137 | 1 | 0 | 6.642342  | 4.965175  | 1.482564  |
| 138 | 1 | 0 | 7.954676  | 4.961414  | 2.668176  |
| 139 | 6 | 0 | 5.634695  | 4.586277  | 4.023118  |
| 140 | 1 | 0 | 4.967460  | 5.210329  | 3.417767  |
| 141 | 1 | 0 | 5.028376  | 4.104645  | 4.797648  |
| 142 | 1 | 0 | 6.353988  | 5.244886  | 4.525746  |

Rotational constants (GHZ): 0.0402957 0.0221548 0.0195110

Standard basis: 6-31G(d) (6D, 7F)

SCF Done: E(RB+HF-LYP) = -2702.42652661 A.U. after 8 cycles

Convg = 0.7568D-09 -V/T = 2.0098

S\*\*2 = 0.0000

| Item                 | Value    | Threshold | Converged? |
|----------------------|----------|-----------|------------|
| Maximum Force        | 0.000053 | 0.000450  | YES        |
| RMS Force            | 0.000004 | 0.000300  | YES        |
| Maximum Displacement | 0.001301 | 0.001800  | YES        |
| RMS Displacement     | 0.000338 | 0.001200  | YES        |

Predicted change in Energy=-2.899413D-08

Optimization completed.

-- Stationary point found.

# Conjoined [5]helicene, meso, $C_{2h}$ at B3LYP/6-31G(d) in the gas phase

Stoichiometry C64H74N4  
 Framework group C2H[SGH(C4H2),X(C60H72N4)]  
 Deg. of freedom 107  
 Full point group C2H  
 Largest Abelian subgroup C2H NOp 4  
 Largest concise Abelian subgroup C2H NOp 4  
 Standard orientation:

| Center Number | Atomic Number | Atomic Type | Coordinates (Angstroms) |           |           |
|---------------|---------------|-------------|-------------------------|-----------|-----------|
|               |               |             | X                       | Y         | Z         |
| 1             | 7             | 0           | -0.627544               | 0.330576  | 2.426181  |
| 2             | 7             | 0           | -0.627544               | 0.330576  | -2.426181 |
| 3             | 6             | 0           | -3.513233               | -0.822110 | 5.326717  |
| 4             | 6             | 0           | -3.716350               | 0.252180  | 4.443711  |
| 5             | 1             | 0           | -4.649452               | 0.799934  | 4.506675  |
| 6             | 6             | 0           | -2.774104               | 0.659400  | 3.499200  |
| 7             | 6             | 0           | -2.962568               | 1.891524  | 2.595905  |
| 8             | 6             | 0           | -2.363328               | 1.537134  | 1.232022  |
| 9             | 6             | 0           | -2.937172               | 1.871303  | 0.000000  |
| 10            | 1             | 0           | -3.878227               | 2.404951  | 0.000000  |
| 11            | 6             | 0           | -2.363328               | 1.537134  | -1.232022 |
| 12            | 6             | 0           | -2.962568               | 1.891524  | -2.595905 |
| 13            | 6             | 0           | -2.774104               | 0.659400  | -3.499200 |
| 14            | 6             | 0           | -3.716350               | 0.252180  | -4.443711 |
| 15            | 1             | 0           | -4.649452               | 0.799934  | -4.506675 |
| 16            | 6             | 0           | -3.513233               | -0.822110 | -5.326717 |
| 17            | 6             | 0           | -2.293005               | -1.496217 | -5.229113 |
| 18            | 1             | 0           | -2.068974               | -2.329456 | -5.885812 |
| 19            | 6             | 0           | -1.331768               | -1.132322 | -4.286350 |
| 20            | 1             | 0           | -0.398707               | -1.677466 | -4.231472 |
| 21            | 6             | 0           | -1.570304               | -0.074809 | -3.408471 |
| 22            | 6             | 0           | -1.160427               | 0.815463  | -1.209899 |
| 23            | 6             | 0           | -0.575465               | 0.439276  | 0.000000  |
| 24            | 6             | 0           | -1.160427               | 0.815463  | 1.209899  |
| 25            | 6             | 0           | -1.570304               | -0.074809 | 3.408471  |
| 26            | 6             | 0           | -1.331768               | -1.132322 | 4.286350  |
| 27            | 6             | 0           | -2.293005               | -1.496217 | 5.229113  |
| 28            | 1             | 0           | -2.068974               | -2.329456 | 5.885812  |
| 29            | 6             | 0           | -4.438026               | 2.312243  | 2.487428  |
| 30            | 1             | 0           | -5.064309               | 1.510694  | 2.081533  |
| 31            | 1             | 0           | -4.540719               | 3.191559  | 1.843958  |
| 32            | 1             | 0           | -4.833176               | 2.597248  | 3.467101  |
| 33            | 6             | 0           | -2.171874               | 3.089548  | 3.196624  |
| 34            | 1             | 0           | -1.101404               | 2.876461  | 3.253611  |
| 35            | 1             | 0           | -2.533240               | 3.317987  | 4.206021  |
| 36            | 1             | 0           | -2.302484               | 3.979225  | 2.569427  |
| 37            | 6             | 0           | -4.438026               | 2.312243  | -2.487428 |
| 38            | 1             | 0           | -5.064309               | 1.510694  | -2.081533 |
| 39            | 1             | 0           | -4.833176               | 2.597248  | -3.467101 |
| 40            | 1             | 0           | -4.540719               | 3.191559  | -1.843958 |
| 41            | 6             | 0           | -2.171874               | 3.089548  | -3.196624 |
| 42            | 1             | 0           | -1.101404               | 2.876461  | -3.253611 |
| 43            | 1             | 0           | -2.302484               | 3.979225  | -2.569427 |
| 44            | 1             | 0           | -2.533240               | 3.317987  | -4.206021 |
| 45            | 1             | 0           | -0.398707               | -1.677466 | 4.231472  |
| 46            | 6             | 0           | 0.575465                | -0.439276 | 0.000000  |
| 47            | 6             | 0           | 1.160427                | -0.815463 | -1.209899 |
| 48            | 7             | 0           | 0.627544                | -0.330576 | -2.426181 |
| 49            | 7             | 0           | 0.627544                | -0.330576 | 2.426181  |
| 50            | 6             | 0           | 1.160427                | -0.815463 | 1.209899  |
| 51            | 6             | 0           | 2.363328                | -1.537134 | -1.232022 |
| 52            | 6             | 0           | 2.363328                | -1.537134 | 1.232022  |
| 53            | 6             | 0           | 2.937172                | -1.871303 | 0.000000  |
| 54            | 1             | 0           | 3.878227                | -2.404951 | 0.000000  |
| 55            | 6             | 0           | 2.962568                | -1.891524 | -2.595905 |
| 56            | 6             | 0           | 2.962568                | -1.891524 | 2.595905  |
| 57            | 6             | 0           | 2.774104                | -0.659400 | 3.499200  |
| 58            | 6             | 0           | 2.774104                | -0.659400 | -3.499200 |
| 59            | 6             | 0           | 1.570304                | 0.074809  | -3.408471 |
| 60            | 6             | 0           | 3.716350                | -0.252180 | -4.443711 |
| 61            | 1             | 0           | 4.649452                | -0.799934 | -4.506675 |
| 62            | 6             | 0           | 3.513233                | 0.822110  | -5.326717 |
| 63            | 6             | 0           | 2.293005                | 1.496217  | -5.229113 |
| 64            | 1             | 0           | 2.068974                | 2.329456  | -5.885812 |
| 65            | 6             | 0           | 1.331768                | 1.132322  | -4.286350 |
| 66            | 1             | 0           | 0.398707                | 1.677466  | -4.231472 |
| 67            | 6             | 0           | 1.570304                | 0.074809  | 3.408471  |
| 68            | 6             | 0           | 3.716350                | -0.252180 | 4.443711  |
| 69            | 1             | 0           | 4.649452                | -0.799934 | 4.506675  |
| 70            | 6             | 0           | 3.513233                | 0.822110  | 5.326717  |
| 71            | 6             | 0           | 2.293005                | 1.496217  | 5.229113  |
| 72            | 1             | 0           | 2.068974                | 2.329456  | 5.885812  |
| 73            | 6             | 0           | 1.331768                | 1.132322  | 4.286350  |
| 74            | 1             | 0           | 0.398707                | 1.677466  | 4.231472  |
| 75            | 6             | 0           | 2.171874                | -3.089548 | -3.196624 |
| 76            | 1             | 0           | 1.101404                | -2.876461 | -3.253611 |
| 77            | 1             | 0           | 2.533240                | -3.317987 | -4.206021 |
| 78            | 1             | 0           | 2.302484                | -3.979225 | -2.569427 |
| 79            | 6             | 0           | 4.438026                | -2.312243 | -2.487428 |
| 80            | 1             | 0           | 5.064309                | -1.510694 | -2.081533 |
| 81            | 1             | 0           | 4.540719                | -3.191559 | -1.843958 |

|     |   |   |           |           |           |
|-----|---|---|-----------|-----------|-----------|
| 82  | 1 | 0 | 4.833176  | -2.597248 | -3.467101 |
| 83  | 6 | 0 | 4.438026  | -2.312243 | 2.487428  |
| 84  | 1 | 0 | 4.540719  | -3.191559 | 1.843958  |
| 85  | 1 | 0 | 5.064309  | -1.510694 | 2.081533  |
| 86  | 1 | 0 | 4.833176  | -2.597248 | 3.467101  |
| 87  | 6 | 0 | 2.171874  | -3.089548 | 3.196624  |
| 88  | 1 | 0 | 2.533240  | -3.317987 | 4.206021  |
| 89  | 1 | 0 | 1.101404  | -2.876461 | 3.253611  |
| 90  | 1 | 0 | 2.302484  | -3.979225 | 2.569427  |
| 91  | 6 | 0 | -4.606213 | -1.195842 | -6.344740 |
| 92  | 6 | 0 | 4.606213  | 1.195842  | -6.344740 |
| 93  | 6 | 0 | -4.606213 | -1.195842 | 6.344740  |
| 94  | 6 | 0 | 4.606213  | 1.195842  | 6.344740  |
| 95  | 6 | 0 | -4.204677 | -2.403330 | -7.212961 |
| 96  | 1 | 0 | -3.300369 | -2.201925 | -7.798516 |
| 97  | 1 | 0 | -4.027792 | -3.299371 | -6.607151 |
| 98  | 1 | 0 | -5.009914 | -2.635420 | -7.919343 |
| 99  | 6 | 0 | -4.204677 | -2.403330 | 7.212961  |
| 100 | 1 | 0 | -4.027792 | -3.299371 | 6.607151  |
| 101 | 1 | 0 | -3.300369 | -2.201925 | 7.798516  |
| 102 | 1 | 0 | -5.009914 | -2.635420 | 7.919343  |
| 103 | 6 | 0 | 4.204677  | 2.403330  | 7.212961  |
| 104 | 1 | 0 | 4.027792  | 3.299371  | 6.607151  |
| 105 | 1 | 0 | 3.300369  | 2.201925  | 7.798516  |
| 106 | 1 | 0 | 5.009914  | 2.635420  | 7.919343  |
| 107 | 6 | 0 | 4.204677  | 2.403330  | -7.212961 |
| 108 | 1 | 0 | 3.300369  | 2.201925  | -7.798516 |
| 109 | 1 | 0 | 4.027792  | 3.299371  | -6.607151 |
| 110 | 1 | 0 | 5.009914  | 2.635420  | -7.919343 |
| 111 | 6 | 0 | -4.873961 | 0.002859  | 7.285988  |
| 112 | 1 | 0 | -5.202810 | 0.889584  | 6.733617  |
| 113 | 1 | 0 | -5.658321 | -0.247229 | 8.011207  |
| 114 | 1 | 0 | -3.969376 | 0.273207  | 7.842725  |
| 115 | 6 | 0 | -5.911114 | -1.556969 | 5.595666  |
| 116 | 1 | 0 | -6.277269 | -0.722529 | 4.988056  |
| 117 | 1 | 0 | -5.754942 | -2.412035 | 4.928174  |
| 118 | 1 | 0 | -6.701748 | -1.821012 | 6.309065  |
| 119 | 6 | 0 | -4.873961 | 0.002859  | -7.285988 |
| 120 | 1 | 0 | -5.658321 | -0.247229 | -8.011207 |
| 121 | 1 | 0 | -5.202810 | 0.889584  | -6.733617 |
| 122 | 1 | 0 | -3.969376 | 0.273207  | -7.842725 |
| 123 | 6 | 0 | -5.911114 | -1.556969 | -5.595666 |
| 124 | 1 | 0 | -5.754942 | -2.412035 | -4.928174 |
| 125 | 1 | 0 | -6.277269 | -0.722529 | -4.988056 |
| 126 | 1 | 0 | -6.701748 | -1.821012 | -6.309065 |
| 127 | 6 | 0 | 4.873961  | -0.002859 | -7.285988 |
| 128 | 1 | 0 | 5.658321  | 0.247229  | -8.011207 |
| 129 | 1 | 0 | 5.202810  | -0.889584 | -6.733617 |
| 130 | 1 | 0 | 3.969376  | -0.273207 | -7.842725 |
| 131 | 6 | 0 | 5.911114  | 1.556969  | -5.595666 |
| 132 | 1 | 0 | 5.754942  | 2.412035  | -4.928174 |
| 133 | 1 | 0 | 6.277269  | 0.722529  | -4.988056 |
| 134 | 1 | 0 | 6.701748  | 1.821012  | -6.309065 |
| 135 | 6 | 0 | 4.873961  | -0.002859 | 7.285988  |
| 136 | 1 | 0 | 5.202810  | -0.889584 | 6.733617  |
| 137 | 1 | 0 | 5.658321  | 0.247229  | 8.011207  |
| 138 | 1 | 0 | 3.969376  | -0.273207 | 7.842725  |
| 139 | 6 | 0 | 5.911114  | 1.556969  | 5.595666  |
| 140 | 1 | 0 | 6.277269  | 0.722529  | 4.988056  |
| 141 | 1 | 0 | 5.754942  | 2.412035  | 4.928174  |
| 142 | 1 | 0 | 6.701748  | 1.821012  | 6.309065  |

Rotational constants (GHZ): 0.0401191 0.0250620 0.0178378

Standard basis: 6-31G(d) (6D, 7F)

SCF Done: E(RB+HF-LYP) = -2702.42829142 A.U. after 8 cycles

Convg = 0.9758D-09 -V/T = 2.0098

S\*\*2 = 0.0000

| Item                 | Value    | Threshold | Converged? |
|----------------------|----------|-----------|------------|
| Maximum Force        | 0.000002 | 0.000450  | YES        |
| RMS Force            | 0.000000 | 0.000300  | YES        |
| Maximum Displacement | 0.010363 | 0.001800  | NO         |
| RMS Displacement     | 0.002186 | 0.001200  | NO         |

Predicted change in Energy=-1.114960D-06

Optimization completed on the basis of negligible forces.

-- Stationary point found.



# Conjoined [5]helicene, chiral, $D_2$ at B3LYP/6-31G(d) in DCM

Stoichiometry C64H74N4  
 Framework group D2[C2(HCC.CCH),X(C60H72N4)]  
 Deg. of freedom 105  
 Full point group D2 NOp 4  
 Largest Abelian subgroup D2 NOp 4  
 Largest concise Abelian subgroup D2 NOp 4  
 Standard orientation:

| Center Number | Atomic Number | Atomic Type | Coordinates (Angstroms) |           |           |
|---------------|---------------|-------------|-------------------------|-----------|-----------|
|               |               |             | X                       | Y         | Z         |
| 1             | 7             | 0           | 2.429080                | 0.087433  | 0.704789  |
| 2             | 7             | 0           | -2.429080               | -0.087433 | 0.704789  |
| 3             | 6             | 0           | 5.346189                | 2.643735  | 2.444412  |
| 4             | 6             | 0           | 4.456099                | 1.874201  | 3.215320  |
| 5             | 1             | 0           | 4.519234                | 1.942068  | 4.295009  |
| 6             | 6             | 0           | 3.504365                | 1.015806  | 2.663703  |
| 7             | 6             | 0           | 2.596338                | 0.106660  | 3.514576  |
| 8             | 6             | 0           | 1.232180                | 0.051498  | 2.818406  |
| 9             | 6             | 0           | 0.000000                | 0.000000  | 3.483041  |
| 10            | 1             | 0           | 0.000000                | 0.000000  | 4.564868  |
| 11            | 6             | 0           | -1.232180               | -0.051498 | 2.818406  |
| 12            | 6             | 0           | -2.596338               | -0.106660 | 3.514576  |
| 13            | 6             | 0           | -3.504365               | -1.015806 | 2.663703  |
| 14            | 6             | 0           | -4.456099               | -1.874201 | 3.215320  |
| 15            | 1             | 0           | -4.519234               | -1.942068 | 4.295009  |
| 16            | 6             | 0           | -5.346189               | -2.643735 | 2.444412  |
| 17            | 6             | 0           | -5.248138               | -2.518693 | 1.055567  |
| 18            | 1             | 0           | -5.907951               | -3.078601 | 0.402142  |
| 19            | 6             | 0           | -4.298948               | -1.684166 | 0.463113  |
| 20            | 1             | 0           | -4.242949               | -1.615008 | -0.615594 |
| 21            | 6             | 0           | -3.416726               | -0.947531 | 1.254104  |
| 22            | 6             | 0           | -1.209531               | -0.018320 | 1.416977  |
| 23            | 6             | 0           | 0.000000                | 0.000000  | 0.722940  |
| 24            | 6             | 0           | 1.209531                | 0.018320  | 1.416977  |
| 25            | 6             | 0           | 3.416726                | 0.947531  | 1.254104  |
| 26            | 6             | 0           | 4.298948                | 1.684166  | 0.463113  |
| 27            | 6             | 0           | 5.248138                | 2.518693  | 1.055567  |
| 28            | 1             | 0           | 5.907951                | 3.078601  | 0.402142  |
| 29            | 6             | 0           | 3.200937                | -1.327194 | 3.545674  |
| 30            | 1             | 0           | 3.260508                | -1.761374 | 2.544173  |
| 31            | 1             | 0           | 2.574844                | -1.984710 | 4.159921  |
| 32            | 1             | 0           | 4.209228                | -1.306506 | 3.974914  |
| 33            | 6             | 0           | 2.480869                | 0.599584  | 4.967827  |
| 34            | 1             | 0           | 2.071855                | 1.613931  | 5.024975  |
| 35            | 1             | 0           | 3.458191                | 0.591829  | 5.459223  |
| 36            | 1             | 0           | 1.837381                | -0.066122 | 5.550412  |
| 37            | 6             | 0           | -2.480869               | -0.599584 | 4.967827  |
| 38            | 1             | 0           | -2.071855               | -1.613931 | 5.024975  |
| 39            | 1             | 0           | -3.458191               | -0.591829 | 5.459223  |
| 40            | 1             | 0           | -1.837381               | 0.066122  | 5.550412  |
| 41            | 6             | 0           | -3.200937               | 1.327194  | 3.545674  |
| 42            | 1             | 0           | -3.260508               | 1.761374  | 2.544173  |
| 43            | 1             | 0           | -2.574844               | 1.984710  | 4.159921  |
| 44            | 1             | 0           | -4.209228               | 1.306506  | 3.974914  |
| 45            | 1             | 0           | 4.242949                | 1.615008  | -0.615594 |
| 46            | 6             | 0           | 0.000000                | 0.000000  | -0.722940 |
| 47            | 6             | 0           | -1.209531               | 0.018320  | -1.416977 |
| 48            | 7             | 0           | -2.429080               | 0.087433  | -0.704789 |
| 49            | 7             | 0           | 2.429080                | -0.087433 | -0.704789 |
| 50            | 6             | 0           | 1.209531                | -0.018320 | -1.416977 |
| 51            | 6             | 0           | -1.232180               | 0.051498  | -2.818406 |
| 52            | 6             | 0           | 1.232180                | -0.051498 | -2.818406 |
| 53            | 6             | 0           | 0.000000                | 0.000000  | -3.483041 |
| 54            | 1             | 0           | 0.000000                | 0.000000  | -4.564868 |
| 55            | 6             | 0           | 2.596338                | -0.106660 | -3.514576 |
| 56            | 6             | 0           | -2.596338               | 0.106660  | -3.514576 |
| 57            | 6             | 0           | 3.504365                | -1.015806 | -2.663703 |
| 58            | 6             | 0           | -3.504365               | 1.015806  | -2.663703 |
| 59            | 6             | 0           | -3.416726               | 0.947531  | -1.254104 |
| 60            | 6             | 0           | 3.416726                | -0.947531 | -1.254104 |
| 61            | 6             | 0           | -4.456099               | 1.874201  | -3.215320 |
| 62            | 1             | 0           | -4.519234               | 1.942068  | -4.295009 |
| 63            | 6             | 0           | 4.456099                | -1.874201 | -3.215320 |
| 64            | 1             | 0           | 4.519234                | -1.942068 | -4.295009 |
| 65            | 6             | 0           | 5.346189                | -2.643735 | -2.444412 |
| 66            | 6             | 0           | 5.248138                | -2.518693 | -1.055567 |
| 67            | 1             | 0           | 5.907951                | -3.078601 | -0.402142 |
| 68            | 6             | 0           | 4.298948                | -1.684166 | -0.463113 |
| 69            | 1             | 0           | 4.242949                | -1.615008 | 0.615594  |
| 70            | 6             | 0           | -5.346189               | 2.643735  | -2.444412 |
| 71            | 6             | 0           | -5.248138               | 2.518693  | -1.055567 |
| 72            | 6             | 0           | -4.298948               | 1.684166  | -0.463113 |
| 73            | 1             | 0           | -4.242949               | 1.615008  | 0.615594  |
| 74            | 1             | 0           | -5.907951               | 3.078601  | -0.402142 |
| 75            | 6             | 0           | -3.200937               | -1.327194 | -3.545674 |
| 76            | 1             | 0           | -3.260508               | -1.761374 | -2.544173 |
| 77            | 1             | 0           | -4.209228               | -1.306506 | -3.974914 |
| 78            | 1             | 0           | -2.574844               | -1.984710 | -4.159921 |
| 79            | 6             | 0           | -2.480869               | 0.599584  | -4.967827 |
| 80            | 1             | 0           | -2.071855               | 1.613931  | -5.024975 |
| 81            | 1             | 0           | -1.837381               | -0.066122 | -5.550412 |

|     |   |   |           |           |           |
|-----|---|---|-----------|-----------|-----------|
| 82  | 1 | 0 | -3.458191 | 0.591829  | -5.459223 |
| 83  | 6 | 0 | 2.480869  | -0.599584 | -4.967827 |
| 84  | 1 | 0 | 2.071855  | -1.613931 | -5.024975 |
| 85  | 1 | 0 | 1.837381  | 0.066122  | -5.550412 |
| 86  | 1 | 0 | 3.458191  | -0.591829 | -5.459223 |
| 87  | 6 | 0 | 3.200937  | 1.327194  | -3.545674 |
| 88  | 1 | 0 | 2.574844  | 1.984710  | -4.159921 |
| 89  | 1 | 0 | 3.260508  | 1.761374  | -2.544173 |
| 90  | 1 | 0 | 4.209228  | 1.306506  | -3.974914 |
| 91  | 6 | 0 | 6.372572  | -3.557894 | -3.139016 |
| 92  | 6 | 0 | -6.372572 | 3.557894  | -3.139016 |
| 93  | 6 | 0 | -6.372572 | -3.557894 | 3.139016  |
| 94  | 6 | 0 | 6.372572  | 3.557894  | 3.139016  |
| 95  | 6 | 0 | 5.633925  | -4.592401 | -4.021510 |
| 96  | 1 | 0 | 5.028807  | -4.109963 | -4.796527 |
| 97  | 1 | 0 | 6.355044  | -5.249400 | -4.523232 |
| 98  | 1 | 0 | 4.967615  | -5.218621 | -3.416925 |
| 99  | 6 | 0 | 7.308815  | -2.706199 | -4.029384 |
| 100 | 1 | 0 | 8.042508  | -3.346955 | -4.533931 |
| 101 | 1 | 0 | 6.753631  | -2.163068 | -4.801676 |
| 102 | 1 | 0 | 7.856287  | -1.970097 | -3.429223 |
| 103 | 6 | 0 | 7.243071  | -4.327629 | -2.127576 |
| 104 | 1 | 0 | 7.824499  | -3.651052 | -1.491031 |
| 105 | 1 | 0 | 6.639212  | -4.972632 | -1.479018 |
| 106 | 1 | 0 | 7.952124  | -4.967919 | -2.664559 |
| 107 | 6 | 0 | -7.243071 | 4.327629  | -2.127576 |
| 108 | 1 | 0 | -7.824499 | 3.651052  | -1.491031 |
| 109 | 1 | 0 | -6.639212 | 4.972632  | -1.479018 |
| 110 | 1 | 0 | -7.952124 | 4.967919  | -2.664559 |
| 111 | 6 | 0 | -5.633925 | 4.592401  | -4.021510 |
| 112 | 1 | 0 | -4.967615 | 5.218621  | -3.416925 |
| 113 | 1 | 0 | -5.028807 | 4.109963  | -4.796527 |
| 114 | 1 | 0 | -6.355044 | 5.249400  | -4.523232 |
| 115 | 6 | 0 | -7.308815 | 2.706199  | -4.029384 |
| 116 | 1 | 0 | -6.753631 | 2.163068  | -4.801676 |
| 117 | 1 | 0 | -7.856287 | 1.970097  | -3.429223 |
| 118 | 1 | 0 | -8.042508 | 3.346955  | -4.533931 |
| 119 | 6 | 0 | -5.633925 | -4.592401 | 4.021510  |
| 120 | 1 | 0 | -5.028807 | -4.109963 | 4.796527  |
| 121 | 1 | 0 | -6.355044 | -5.249400 | 4.523232  |
| 122 | 1 | 0 | -4.967615 | -5.218621 | 3.416925  |
| 123 | 6 | 0 | -7.243071 | -4.327629 | 2.127576  |
| 124 | 1 | 0 | -7.824499 | -3.651052 | 1.491031  |
| 125 | 1 | 0 | -6.639212 | -4.972632 | 1.479018  |
| 126 | 1 | 0 | -7.952124 | -4.967919 | 2.664559  |
| 127 | 6 | 0 | -7.308815 | -2.706199 | 4.029384  |
| 128 | 1 | 0 | -6.753631 | -2.163068 | 4.801676  |
| 129 | 1 | 0 | -7.856287 | -1.970097 | 3.429223  |
| 130 | 1 | 0 | -8.042508 | -3.346955 | 4.533931  |
| 131 | 6 | 0 | 7.308815  | 2.706199  | 4.029384  |
| 132 | 1 | 0 | 8.042508  | 3.346955  | 4.533931  |
| 133 | 1 | 0 | 6.753631  | 2.163068  | 4.801676  |
| 134 | 1 | 0 | 7.856287  | 1.970097  | 3.429223  |
| 135 | 6 | 0 | 7.243071  | 4.327629  | 2.127576  |
| 136 | 1 | 0 | 7.824499  | 3.651052  | 1.491031  |
| 137 | 1 | 0 | 6.639212  | 4.972632  | 1.479018  |
| 138 | 1 | 0 | 7.952124  | 4.967919  | 2.664559  |
| 139 | 6 | 0 | 5.633925  | 4.592401  | 4.021510  |
| 140 | 1 | 0 | 4.967615  | 5.218621  | 3.416925  |
| 141 | 1 | 0 | 5.028807  | 4.109963  | 4.796527  |
| 142 | 1 | 0 | 6.355044  | 5.249400  | 4.523232  |

Rotational constants (GHZ): 0.0402422 0.0221465 0.0195192

Standard basis: 6-31G(d) (6D, 7F)

Error on total polarization charges = 0.01829

SCF Done: E(RB3LYP) = -2702.43460513 A.U. after 3 cycles

Convg = 0.8242D-08 -V/T = 2.0098

| Item                 | Value    | Threshold | Converged? |
|----------------------|----------|-----------|------------|
| Maximum Force        | 0.000000 | 0.000015  | YES        |
| RMS Force            | 0.000000 | 0.000010  | YES        |
| Maximum Displacement | 0.000032 | 0.000060  | YES        |
| RMS Displacement     | 0.000005 | 0.000040  | YES        |

Predicted change in Energy=-1.883371D-11

Optimization completed.

-- Stationary point found.

# Radical cation of conjoined [5]helicene, chiral, $D_2$ at UB3LYP/6-31G(d) in the gas phase

Stoichiometry C64H74N4(1+,2)  
 Framework group D2[C2(HCC.CCH).X(C60H72N4)]  
 Deg. of freedom 105  
 Full point group D2  
 Largest Abelian subgroup D2 NOp 4  
 Largest concise Abelian subgroup D2 NOp 4  
 Standard orientation:

| Center Number | Atomic Number | Atomic Type | Coordinates (Angstroms) |           |           |
|---------------|---------------|-------------|-------------------------|-----------|-----------|
|               |               |             | X                       | Y         | Z         |
| 1             | 7             | 0           | 2.412257                | 0.113444  | 0.690084  |
| 2             | 7             | 0           | -2.412257               | -0.113444 | 0.690084  |
| 3             | 6             | 0           | 5.458360                | 2.450879  | 2.500887  |
| 4             | 6             | 0           | 4.543318                | 1.693731  | 3.253047  |
| 5             | 1             | 0           | 4.616407                | 1.726951  | 4.332955  |
| 6             | 6             | 0           | 3.553209                | 0.894158  | 2.681542  |
| 7             | 6             | 0           | 2.601976                | 0.011658  | 3.511592  |
| 8             | 6             | 0           | 1.239288                | 0.032189  | 2.810749  |
| 9             | 6             | 0           | 0.000000                | 0.000000  | 3.466390  |
| 10            | 1             | 0           | 0.000000                | 0.000000  | 4.548192  |
| 11            | 6             | 0           | -1.239288               | -0.032189 | 2.810749  |
| 12            | 6             | 0           | -2.601976               | -0.011658 | 3.511592  |
| 13            | 6             | 0           | -3.553209               | -0.894158 | 2.681542  |
| 14            | 6             | 0           | -4.543318               | -1.693731 | 3.253047  |
| 15            | 1             | 0           | -4.616407               | -1.726951 | 4.332955  |
| 16            | 6             | 0           | -5.458360               | -2.450879 | 2.500887  |
| 17            | 6             | 0           | -5.342230               | -2.387328 | 1.107312  |
| 18            | 1             | 0           | -6.014136               | -2.952475 | 0.472449  |
| 19            | 6             | 0           | -4.358078               | -1.616421 | 0.494647  |
| 20            | 1             | 0           | -4.282730               | -1.602653 | -0.585187 |
| 21            | 6             | 0           | -3.465826               | -0.878690 | 1.272970  |
| 22            | 6             | 0           | -1.217616               | -0.017168 | 1.412016  |
| 23            | 6             | 0           | 0.000000                | 0.000000  | 0.710650  |
| 24            | 6             | 0           | 1.217616                | 0.017168  | 1.412016  |
| 25            | 6             | 0           | 3.465826                | 0.878690  | 1.272970  |
| 26            | 6             | 0           | 4.358078                | 1.616421  | 0.494647  |
| 27            | 6             | 0           | 5.342230                | 2.387328  | 1.107312  |
| 28            | 1             | 0           | 6.014136                | 2.952475  | 0.472449  |
| 29            | 6             | 0           | 3.136477                | -1.450280 | 3.512862  |
| 30            | 1             | 0           | 3.179882                | -1.869454 | 2.503334  |
| 31            | 1             | 0           | 2.480820                | -2.091480 | 4.112501  |
| 32            | 1             | 0           | 4.143530                | -1.485055 | 3.942201  |
| 33            | 6             | 0           | 2.502016                | 0.482027  | 4.973277  |
| 34            | 1             | 0           | 2.140991                | 1.512936  | 5.049355  |
| 35            | 1             | 0           | 3.474664                | 0.418395  | 5.468470  |
| 36            | 1             | 0           | 1.829133                | -0.166057 | 5.542372  |
| 37            | 6             | 0           | -2.502016               | -0.482027 | 4.973277  |
| 38            | 1             | 0           | -2.140991               | -1.512936 | 5.049355  |
| 39            | 1             | 0           | -3.474664               | -0.418395 | 5.468470  |
| 40            | 1             | 0           | -1.829133               | 0.166057  | 5.542372  |
| 41            | 6             | 0           | -3.136477               | 1.450280  | 3.512862  |
| 42            | 1             | 0           | -3.179882               | 1.869454  | 2.503334  |
| 43            | 1             | 0           | -2.480820               | 2.091480  | 4.112501  |
| 44            | 1             | 0           | -4.143530               | 1.485055  | 3.942201  |
| 45            | 1             | 0           | 4.282730                | 1.602653  | -0.585187 |
| 46            | 6             | 0           | 0.000000                | 0.000000  | -0.710650 |
| 47            | 6             | 0           | -1.217616               | 0.017168  | -1.412016 |
| 48            | 7             | 0           | -2.412257               | 0.113444  | -0.690084 |
| 49            | 7             | 0           | 2.412257                | -0.113444 | -0.690084 |
| 50            | 6             | 0           | 1.217616                | -0.017168 | -1.412016 |
| 51            | 6             | 0           | -1.239288               | 0.032189  | -2.810749 |
| 52            | 6             | 0           | 1.239288                | -0.032189 | -2.810749 |
| 53            | 6             | 0           | 0.000000                | 0.000000  | -3.466390 |
| 54            | 1             | 0           | 0.000000                | 0.000000  | -4.548192 |
| 55            | 6             | 0           | 2.601976                | -0.011658 | -3.511592 |
| 56            | 6             | 0           | -2.601976               | 0.011658  | -3.511592 |
| 57            | 6             | 0           | 3.553209                | -0.894158 | -2.681542 |
| 58            | 6             | 0           | -3.553209               | 0.894158  | -2.681542 |
| 59            | 6             | 0           | -3.465826               | 0.878690  | -1.272970 |
| 60            | 6             | 0           | 3.465826                | -0.878690 | -1.272970 |
| 61            | 6             | 0           | -4.543318               | 1.693731  | -3.253047 |
| 62            | 1             | 0           | -4.616407               | 1.726951  | -4.332955 |
| 63            | 6             | 0           | 4.543318                | -1.693731 | -3.253047 |
| 64            | 1             | 0           | 4.616407                | -1.726951 | -4.332955 |
| 65            | 6             | 0           | 5.458360                | -2.450879 | -2.500887 |
| 66            | 6             | 0           | 5.342230                | -2.387328 | -1.107312 |
| 67            | 1             | 0           | 6.014136                | -2.952475 | -0.472449 |
| 68            | 6             | 0           | 4.358078                | -1.616421 | -0.494647 |
| 69            | 1             | 0           | 4.282730                | -1.602653 | 0.585187  |
| 70            | 6             | 0           | -5.458360               | 2.450879  | -2.500887 |
| 71            | 6             | 0           | -5.342230               | 2.387328  | -1.107312 |
| 72            | 6             | 0           | -4.358078               | 1.616421  | -0.494647 |
| 73            | 1             | 0           | -4.282730               | 1.602653  | 0.585187  |
| 74            | 1             | 0           | -6.014136               | 2.952475  | -0.472449 |
| 75            | 6             | 0           | -3.136477               | -1.450280 | -3.512862 |
| 76            | 1             | 0           | -3.179882               | -1.869454 | -2.503334 |
| 77            | 1             | 0           | -4.143530               | -1.485055 | -3.942201 |
| 78            | 1             | 0           | -2.480820               | -2.091480 | -4.112501 |
| 79            | 6             | 0           | -2.502016               | 0.482027  | -4.973277 |

|     |   |   |           |           |           |
|-----|---|---|-----------|-----------|-----------|
| 80  | 1 | 0 | -2.140991 | 1.512936  | -5.049355 |
| 81  | 1 | 0 | -1.829133 | -0.166057 | -5.542372 |
| 82  | 1 | 0 | -3.474664 | 0.418395  | -5.468470 |
| 83  | 6 | 0 | 2.502016  | -0.482027 | -4.973277 |
| 84  | 1 | 0 | 2.140991  | -1.512936 | -5.049355 |
| 85  | 1 | 0 | 1.829133  | 0.166057  | -5.542372 |
| 86  | 1 | 0 | 3.474664  | -0.418395 | -5.468470 |
| 87  | 6 | 0 | 3.136477  | 1.450280  | -3.512862 |
| 88  | 1 | 0 | 2.480820  | 2.091480  | -4.112501 |
| 89  | 1 | 0 | 3.179882  | 1.869454  | -2.503334 |
| 90  | 1 | 0 | 4.143530  | 1.485055  | -3.942201 |
| 91  | 6 | 0 | 6.526656  | -3.296227 | -3.215900 |
| 92  | 6 | 0 | -6.526656 | 3.296227  | -3.215900 |
| 93  | 6 | 0 | -6.526656 | -3.296227 | 3.215900  |
| 94  | 6 | 0 | 6.526656  | 3.296227  | 3.215900  |
| 95  | 6 | 0 | 5.834489  | -4.328700 | -4.138146 |
| 96  | 1 | 0 | 5.218388  | -3.847551 | -4.905332 |
| 97  | 1 | 0 | 6.586453  | -4.937693 | -4.652950 |
| 98  | 1 | 0 | 5.189427  | -5.002034 | -3.562522 |
| 99  | 6 | 0 | 7.429807  | -2.371196 | -4.067042 |
| 100 | 1 | 0 | 8.195515  | -2.961809 | -4.582948 |
| 101 | 1 | 0 | 6.860465  | -1.829589 | -4.830089 |
| 102 | 1 | 0 | 7.938436  | -1.631297 | -3.438812 |
| 103 | 6 | 0 | 7.421458  | -4.061903 | -2.222685 |
| 104 | 1 | 0 | 7.970844  | -3.384375 | -1.559229 |
| 105 | 1 | 0 | 6.843771  | -4.757823 | -1.603512 |
| 106 | 1 | 0 | 8.161379  | -4.651504 | -2.774082 |
| 107 | 6 | 0 | -7.421458 | 4.061903  | -2.222685 |
| 108 | 1 | 0 | -7.970844 | 3.384375  | -1.559229 |
| 109 | 1 | 0 | -6.843771 | 4.757823  | -1.603512 |
| 110 | 1 | 0 | -8.161379 | 4.651504  | -2.774082 |
| 111 | 6 | 0 | -5.834489 | 4.328700  | -4.138146 |
| 112 | 1 | 0 | -5.189427 | 5.002034  | -3.562522 |
| 113 | 1 | 0 | -5.218388 | 3.847551  | -4.905332 |
| 114 | 1 | 0 | -6.586453 | 4.937693  | -4.652950 |
| 115 | 6 | 0 | -7.429807 | 2.371196  | -4.067042 |
| 116 | 1 | 0 | -6.860465 | 1.829589  | -4.830089 |
| 117 | 1 | 0 | -7.938436 | 1.631297  | -3.438812 |
| 118 | 1 | 0 | -8.195515 | 2.961809  | -4.582948 |
| 119 | 6 | 0 | -5.834489 | -4.328700 | 4.138146  |
| 120 | 1 | 0 | -5.218388 | -3.847551 | 4.905332  |
| 121 | 1 | 0 | -6.586453 | -4.937693 | 4.652950  |
| 122 | 1 | 0 | -5.189427 | -5.002034 | 3.562522  |
| 123 | 6 | 0 | -7.421458 | -4.061903 | 2.222685  |
| 124 | 1 | 0 | -7.970844 | -3.384375 | 1.559229  |
| 125 | 1 | 0 | -6.843771 | -4.757823 | 1.603512  |
| 126 | 1 | 0 | -8.161379 | -4.651504 | 2.774082  |
| 127 | 6 | 0 | -7.429807 | -2.371196 | 4.067042  |
| 128 | 1 | 0 | -6.860465 | -1.829589 | 4.830089  |
| 129 | 1 | 0 | -7.938436 | -1.631297 | 3.438812  |
| 130 | 1 | 0 | -8.195515 | -2.961809 | 4.582948  |
| 131 | 6 | 0 | 7.429807  | 2.371196  | 4.067042  |
| 132 | 1 | 0 | 8.195515  | 2.961809  | 4.582948  |
| 133 | 1 | 0 | 6.860465  | 1.829589  | 4.830089  |
| 134 | 1 | 0 | 7.938436  | 1.631297  | 3.438812  |
| 135 | 6 | 0 | 7.421458  | 4.061903  | 2.222685  |
| 136 | 1 | 0 | 7.970844  | 3.384375  | 1.559229  |
| 137 | 1 | 0 | 6.843771  | 4.757823  | 1.603512  |
| 138 | 1 | 0 | 8.161379  | 4.651504  | 2.774082  |
| 139 | 6 | 0 | 5.834489  | 4.328700  | 4.138146  |
| 140 | 1 | 0 | 5.189427  | 5.002034  | 3.562522  |
| 141 | 1 | 0 | 5.218388  | 3.847551  | 4.905332  |
| 142 | 1 | 0 | 6.586453  | 4.937693  | 4.652950  |

Rotational constants (GHZ): 0.0417392 0.0220542 0.0189078

Standard basis: 6-31G(d) (6D, 7F)

SCF Done: E(UB+HF-LYP) = -2702.23141674 A.U. after 6 cycles

Convg = 0.4719D-08 -V/T = 2.0098

S\*\*2 = 0.7601

Annihilation of the first spin contaminant:

S\*\*2 before annihilation 0.7601, after 0.7501

| Item                 | Value    | Threshold | Converged? |
|----------------------|----------|-----------|------------|
| Maximum Force        | 0.000020 | 0.000450  | YES        |
| RMS Force            | 0.000003 | 0.000300  | YES        |
| Maximum Displacement | 0.001233 | 0.001800  | YES        |
| RMS Displacement     | 0.000252 | 0.001200  | YES        |

Predicted change in Energy=-1.634408D-08

Optimization completed.

-- Stationary point found.

# Radical cation of conjoined [5]helicene, meso, C<sub>2h</sub> at UB3LYP/6-31G(d) in the gas phase

Stoichiometry C64H74N4(1+,2)  
 Framework group C2H[SGH(C4H2),X(C60H72N4)]  
 Deg. of freedom 107  
 Full point group C2H  
 Largest Abelian subgroup C2H NOp 4  
 Largest concise Abelian subgroup C2H NOp 4  
 Standard orientation:

| Center Number | Atomic Number | Atomic Type | Coordinates (Angstroms) |           |           |
|---------------|---------------|-------------|-------------------------|-----------|-----------|
|               |               |             | X                       | Y         | Z         |
| 1             | 7             | 0           | -0.645615               | 0.266344  | 2.412275  |
| 2             | 7             | 0           | -0.645615               | 0.266344  | -2.412275 |
| 3             | 6             | 0           | -3.399872               | -0.831291 | 5.454566  |
| 4             | 6             | 0           | -3.663673               | 0.201684  | 4.538920  |
| 5             | 1             | 0           | -4.610925               | 0.721434  | 4.611263  |
| 6             | 6             | 0           | -2.764590               | 0.600842  | 3.549788  |
| 7             | 6             | 0           | -3.031473               | 1.780922  | 2.598320  |
| 8             | 6             | 0           | -2.439619               | 1.397839  | 1.239187  |
| 9             | 6             | 0           | -3.019367               | 1.701796  | 0.000000  |
| 10            | 1             | 0           | -3.973218               | 2.212057  | 0.000000  |
| 11            | 6             | 0           | -2.439619               | 1.397839  | -1.239187 |
| 12            | 6             | 0           | -3.031473               | 1.780922  | -2.598320 |
| 13            | 6             | 0           | -2.764590               | 0.600842  | -3.549788 |
| 14            | 6             | 0           | -3.663673               | 0.201684  | -4.538920 |
| 15            | 1             | 0           | -4.610925               | 0.721434  | -4.611263 |
| 16            | 6             | 0           | -3.399872               | -0.831291 | -5.454566 |
| 17            | 6             | 0           | -2.167956               | -1.485611 | -5.336283 |
| 18            | 1             | 0           | -1.908012               | -2.295211 | -6.007799 |
| 19            | 6             | 0           | -1.248849               | -1.132006 | -4.352163 |
| 20            | 1             | 0           | -0.312131               | -1.669119 | -4.277132 |
| 21            | 6             | 0           | -1.543183               | -0.099466 | -3.460896 |
| 22            | 6             | 0           | -1.206293               | 0.734917  | -1.218609 |
| 23            | 6             | 0           | -0.590591               | 0.396623  | 0.000000  |
| 24            | 6             | 0           | -1.206293               | 0.734917  | 1.218609  |
| 25            | 6             | 0           | -1.543183               | -0.099466 | 3.460896  |
| 26            | 6             | 0           | -1.248849               | -1.132006 | 4.352163  |
| 27            | 6             | 0           | -2.167956               | -1.485611 | 5.336283  |
| 28            | 1             | 0           | -1.908012               | -2.295211 | 6.007799  |
| 29            | 6             | 0           | -4.528703               | 2.120696  | 2.498609  |
| 30            | 1             | 0           | -5.119954               | 1.272827  | 2.137395  |
| 31            | 1             | 0           | -4.687458               | 2.968563  | 1.825638  |
| 32            | 1             | 0           | -4.921877               | 2.426713  | 3.471671  |
| 33            | 6             | 0           | -2.288383               | 3.041298  | 3.128824  |
| 34            | 1             | 0           | -1.206063               | 2.888463  | 3.173856  |
| 35            | 1             | 0           | -2.640814               | 3.292966  | 4.134924  |
| 36            | 1             | 0           | -2.477354               | 3.896702  | 2.470597  |
| 37            | 6             | 0           | -4.528703               | 2.120696  | -2.498609 |
| 38            | 1             | 0           | -5.119954               | 1.272827  | -2.137395 |
| 39            | 1             | 0           | -4.921877               | 2.426713  | -3.471671 |
| 40            | 1             | 0           | -4.687458               | 2.968563  | -1.825638 |
| 41            | 6             | 0           | -2.288383               | 3.041298  | -3.128824 |
| 42            | 1             | 0           | -1.206063               | 2.888463  | -3.173856 |
| 43            | 1             | 0           | -2.477354               | 3.896702  | -2.470597 |
| 44            | 1             | 0           | -2.640814               | 3.292966  | -4.134924 |
| 45            | 1             | 0           | -0.312131               | -1.669119 | 4.277132  |
| 46            | 6             | 0           | 0.590591                | -0.396623 | 0.000000  |
| 47            | 6             | 0           | 1.206293                | -0.734917 | -1.218609 |
| 48            | 7             | 0           | 0.645615                | -0.266344 | -2.412275 |
| 49            | 7             | 0           | 0.645615                | -0.266344 | 2.412275  |
| 50            | 6             | 0           | 1.206293                | -0.734917 | 1.218609  |
| 51            | 6             | 0           | 2.439619                | -1.397839 | -1.239187 |
| 52            | 6             | 0           | 2.439619                | -1.397839 | 1.239187  |
| 53            | 6             | 0           | 3.019367                | -1.701796 | 0.000000  |
| 54            | 1             | 0           | 3.973218                | -2.212057 | 0.000000  |
| 55            | 6             | 0           | 3.031473                | -1.780922 | -2.598320 |
| 56            | 6             | 0           | 3.031473                | -1.780922 | 2.598320  |
| 57            | 6             | 0           | 2.764590                | -0.600842 | 3.549788  |
| 58            | 6             | 0           | 2.764590                | -0.600842 | -3.549788 |
| 59            | 6             | 0           | 1.543183                | 0.099466  | -3.460896 |
| 60            | 6             | 0           | 3.663673                | -0.201684 | -4.538920 |
| 61            | 1             | 0           | 4.610925                | -0.721434 | -4.611263 |
| 62            | 6             | 0           | 3.399872                | 0.831291  | -5.454566 |
| 63            | 6             | 0           | 2.167956                | 1.485611  | -5.336283 |
| 64            | 1             | 0           | 1.908012                | 2.295211  | -6.007799 |
| 65            | 6             | 0           | 1.248849                | 1.132006  | -4.352163 |
| 66            | 1             | 0           | 0.312131                | 1.669119  | -4.277132 |
| 67            | 6             | 0           | 1.543183                | 0.099466  | 3.460896  |
| 68            | 6             | 0           | 3.663673                | -0.201684 | 4.538920  |
| 69            | 1             | 0           | 4.610925                | -0.721434 | 4.611263  |
| 70            | 6             | 0           | 3.399872                | 0.831291  | 5.454566  |
| 71            | 6             | 0           | 2.167956                | 1.485611  | 5.336283  |
| 72            | 1             | 0           | 1.908012                | 2.295211  | 6.007799  |
| 73            | 6             | 0           | 1.248849                | 1.132006  | 4.352163  |
| 74            | 1             | 0           | 0.312131                | 1.669119  | 4.277132  |
| 75            | 6             | 0           | 2.288383                | -3.041298 | -3.128824 |
| 76            | 1             | 0           | 1.206063                | -2.888463 | -3.173856 |
| 77            | 1             | 0           | 2.640814                | -3.292966 | -4.134924 |
| 78            | 1             | 0           | 2.477354                | -3.896702 | -2.470597 |
| 79            | 6             | 0           | 4.528703                | -2.120696 | -2.498609 |

|     |   |   |           |           |           |
|-----|---|---|-----------|-----------|-----------|
| 80  | 1 | 0 | 5.119954  | -1.272827 | -2.137395 |
| 81  | 1 | 0 | 4.687458  | -2.968563 | -1.825638 |
| 82  | 1 | 0 | 4.921877  | -2.426713 | -3.471671 |
| 83  | 6 | 0 | 4.528703  | -2.120696 | 2.498609  |
| 84  | 1 | 0 | 4.687458  | -2.968563 | 1.825638  |
| 85  | 1 | 0 | 5.119954  | -1.272827 | 2.137395  |
| 86  | 1 | 0 | 4.921877  | -2.426713 | 3.471671  |
| 87  | 6 | 0 | 2.288383  | -3.041298 | 3.128824  |
| 88  | 1 | 0 | 2.640814  | -3.292966 | 4.134924  |
| 89  | 1 | 0 | 1.206063  | -2.888463 | 3.173856  |
| 90  | 1 | 0 | 2.477354  | -3.896702 | 2.470597  |
| 91  | 6 | 0 | -4.445232 | -1.194369 | -6.523683 |
| 92  | 6 | 0 | 4.445232  | 1.194369  | -6.523683 |
| 93  | 6 | 0 | -4.445232 | -1.194369 | 6.523683  |
| 94  | 6 | 0 | 4.445232  | 1.194369  | 6.523683  |
| 95  | 6 | 0 | -3.965283 | -2.333309 | -7.443041 |
| 96  | 1 | 0 | -3.051492 | -2.064266 | -7.985080 |
| 97  | 1 | 0 | -3.776911 | -3.258218 | -6.886117 |
| 98  | 1 | 0 | -4.736634 | -2.551796 | -8.188913 |
| 99  | 6 | 0 | -3.965283 | -2.333309 | 7.443041  |
| 100 | 1 | 0 | -3.776911 | -3.258218 | 6.886117  |
| 101 | 1 | 0 | -3.051492 | -2.064266 | 7.985080  |
| 102 | 1 | 0 | -4.736634 | -2.551796 | 8.188913  |
| 103 | 6 | 0 | 3.965283  | 2.333309  | 7.443041  |
| 104 | 1 | 0 | 3.776911  | 3.258218  | 6.886117  |
| 105 | 1 | 0 | 3.051492  | 2.064266  | 7.985080  |
| 106 | 1 | 0 | 4.736634  | 2.551796  | 8.188913  |
| 107 | 6 | 0 | 3.965283  | 2.333309  | -7.443041 |
| 108 | 1 | 0 | 3.051492  | 2.064266  | -7.985080 |
| 109 | 1 | 0 | 3.776911  | 3.258218  | -6.886117 |
| 110 | 1 | 0 | 4.736634  | 2.551796  | -8.188913 |
| 111 | 6 | 0 | -4.736044 | 0.045606  | 7.403594  |
| 112 | 1 | 0 | -5.129062 | 0.883425  | 6.817687  |
| 113 | 1 | 0 | -5.482240 | -0.201357 | 8.167362  |
| 114 | 1 | 0 | -3.829195 | 0.388410  | 7.914447  |
| 115 | 6 | 0 | -5.751810 | -1.648818 | 5.829750  |
| 116 | 1 | 0 | -6.174000 | -0.862941 | 5.194227  |
| 117 | 1 | 0 | -5.579015 | -2.531151 | 5.203301  |
| 118 | 1 | 0 | -6.507079 | -1.908595 | 6.580450  |
| 119 | 6 | 0 | -4.736044 | 0.045606  | -7.403594 |
| 120 | 1 | 0 | -5.482240 | -0.201357 | -8.167362 |
| 121 | 1 | 0 | -5.129062 | 0.883425  | -6.817687 |
| 122 | 1 | 0 | -3.829195 | 0.388410  | -7.914447 |
| 123 | 6 | 0 | -5.751810 | -1.648818 | -5.829750 |
| 124 | 1 | 0 | -5.579015 | -2.531151 | -5.203301 |
| 125 | 1 | 0 | -6.174000 | -0.862941 | -5.194227 |
| 126 | 1 | 0 | -6.507079 | -1.908595 | -6.580450 |
| 127 | 6 | 0 | 4.736044  | -0.045606 | -7.403594 |
| 128 | 1 | 0 | 5.482240  | 0.201357  | -8.167362 |
| 129 | 1 | 0 | 5.129062  | -0.883425 | -6.817687 |
| 130 | 1 | 0 | 3.829195  | -0.388410 | -7.914447 |
| 131 | 6 | 0 | 5.751810  | 1.648818  | -5.829750 |
| 132 | 1 | 0 | 5.579015  | 2.531151  | -5.203301 |
| 133 | 1 | 0 | 6.174000  | 0.862941  | -5.194227 |
| 134 | 1 | 0 | 6.507079  | 1.908595  | -6.580450 |
| 135 | 6 | 0 | 4.736044  | -0.045606 | 7.403594  |
| 136 | 1 | 0 | 5.129062  | -0.883425 | 6.817687  |
| 137 | 1 | 0 | 5.482240  | 0.201357  | 8.167362  |
| 138 | 1 | 0 | 3.829195  | -0.388410 | 7.914447  |
| 139 | 6 | 0 | 5.751810  | 1.648818  | 5.829750  |
| 140 | 1 | 0 | 6.174000  | 0.862941  | 5.194227  |
| 141 | 1 | 0 | 5.579015  | 2.531151  | 5.203301  |
| 142 | 1 | 0 | 6.507079  | 1.908595  | 6.580450  |

Rotational constants (GHZ): 0.0417368 0.0242815 0.0175616

Standard basis: 6-31G(d) (6D, 7F)

SCF Done: E(UB+HF-LYP) = -2702.23154745 A.U. after 7 cycles

Convg = 0.2730D-08 -V/T = 2.0098

S\*\*2 = 0.7601

Annihilation of the first spin contaminant:

S\*\*2 before annihilation 0.7601, after 0.7501

| Item                 | Value    | Threshold | Converged? |
|----------------------|----------|-----------|------------|
| Maximum Force        | 0.000002 | 0.000450  | YES        |
| RMS Force            | 0.000000 | 0.000300  | YES        |
| Maximum Displacement | 0.005718 | 0.001800  | NO         |
| RMS Displacement     | 0.001070 | 0.001200  | YES        |

Predicted change in Energy=-1.210376D-06

Optimization completed on the basis of negligible forces.

-- Stationary point found.

# Radical cation of conjoined [5]helicene, meso, $C_{2h}$ , stationary point with two imaginary frequencies at UB3LYP/6-31G(d) in the gas phase.

Stoichiometry C64H74N4(1+,2)  
 Framework group C2H[C2(HCC.CCH),X(C60H72N4)]  
 Deg. of freedom 104  
 Full point group C2H NOp 4  
 Largest Abelian subgroup C2H NOp 4  
 Largest concise Abelian subgroup C2H NOp 4  
 Standard orientation:

| Center Number | Atomic Number | Atomic Type | Coordinates (Angstroms) |           |           |
|---------------|---------------|-------------|-------------------------|-----------|-----------|
|               |               |             | X                       | Y         | Z         |
| 1             | 6             | 0           | 0.000000                | 0.000000  | 3.421924  |
| 2             | 6             | 0           | -0.465191               | 1.146025  | 2.753066  |
| 3             | 6             | 0           | -0.171386               | 1.210712  | 1.381890  |
| 4             | 6             | 0           | 0.000000                | 0.000000  | 0.699274  |
| 5             | 6             | 0           | 0.171386                | -1.210712 | 1.381890  |
| 6             | 6             | 0           | 0.465191                | -1.146025 | 2.753066  |
| 7             | 6             | 0           | 0.000000                | 0.000000  | -0.699274 |
| 8             | 6             | 0           | -0.171386               | 1.210712  | -1.381890 |
| 9             | 6             | 0           | -0.465191               | 1.146025  | -2.753066 |
| 10            | 6             | 0           | 0.000000                | 0.000000  | -3.421924 |
| 11            | 6             | 0           | 0.465191                | -1.146025 | -2.753066 |
| 12            | 6             | 0           | 0.171386                | -1.210712 | -1.381890 |
| 13            | 1             | 0           | 0.000000                | 0.000000  | 4.506696  |
| 14            | 1             | 0           | 0.000000                | 0.000000  | -4.506696 |
| 15            | 7             | 0           | -0.044687               | 2.441958  | 0.728315  |
| 16            | 7             | 0           | -0.044687               | 2.441958  | -0.728315 |
| 17            | 7             | 0           | 0.044687                | -2.441958 | 0.728315  |
| 18            | 7             | 0           | 0.044687                | -2.441958 | -0.728315 |
| 19            | 6             | 0           | 0.080446                | 3.580220  | 1.618778  |
| 20            | 6             | 0           | 1.056841                | 4.573079  | 1.494737  |
| 21            | 6             | 0           | -0.647384               | 3.563982  | 2.840257  |
| 22            | 6             | 0           | 1.114852                | 5.669604  | 2.350065  |
| 23            | 1             | 0           | 1.849053                | 4.467265  | 0.781930  |
| 24            | 6             | 0           | -0.582024               | 4.681973  | 3.672474  |
| 25            | 1             | 0           | 1.883638                | 6.411995  | 2.169175  |
| 26            | 1             | 0           | -1.178012               | 4.669146  | 4.576910  |
| 27            | 6             | 0           | -0.080446               | -3.580220 | 1.618778  |
| 28            | 6             | 0           | 0.647384                | -3.563982 | 2.840257  |
| 29            | 6             | 0           | -1.056841               | -4.573079 | 1.494737  |
| 30            | 6             | 0           | 0.582024                | -4.681973 | 3.672474  |
| 31            | 6             | 0           | -1.114852               | -5.669604 | 2.350065  |
| 32            | 1             | 0           | -1.849053               | -4.467265 | 0.781930  |
| 33            | 1             | 0           | 1.178012                | -4.669146 | 4.576910  |
| 34            | 1             | 0           | -1.883638               | -6.411995 | 2.169175  |
| 35            | 6             | 0           | -0.080446               | -3.580220 | -1.618778 |
| 36            | 6             | 0           | 0.647384                | -3.563982 | -2.840257 |
| 37            | 6             | 0           | -1.056841               | -4.573079 | -1.494737 |
| 38            | 6             | 0           | 0.582024                | -4.681973 | -3.672474 |
| 39            | 6             | 0           | -1.114852               | -5.669604 | -2.350065 |
| 40            | 1             | 0           | -1.849053               | -4.467265 | -0.781930 |
| 41            | 1             | 0           | 1.178012                | -4.669146 | -4.576910 |
| 42            | 1             | 0           | -1.883638               | -6.411995 | -2.169175 |
| 43            | 6             | 0           | 0.080446                | 3.580220  | -1.618778 |
| 44            | 6             | 0           | -0.647384               | 3.563982  | -2.840257 |
| 45            | 6             | 0           | 1.056841                | 4.573079  | -1.494737 |
| 46            | 6             | 0           | -0.582024               | 4.681973  | -3.672474 |
| 47            | 6             | 0           | 1.114852                | 5.669604  | -2.350065 |
| 48            | 1             | 0           | 1.849053                | 4.467265  | -0.781930 |
| 49            | 1             | 0           | -1.178012               | 4.669146  | -4.576910 |
| 50            | 1             | 0           | 1.883638                | 6.411995  | -2.169175 |
| 51            | 6             | 0           | -1.327697               | 2.274491  | -3.310377 |
| 52            | 6             | 0           | -1.327697               | 2.274491  | 3.310377  |
| 53            | 6             | 0           | 1.327697                | -2.274491 | -3.310377 |
| 54            | 6             | 0           | 1.327697                | -2.274491 | 3.310377  |
| 55            | 6             | 0           | -0.237900               | -5.792971 | 3.428930  |
| 56            | 6             | 0           | -0.237900               | -5.792971 | -3.428930 |
| 57            | 6             | 0           | 0.237900                | 5.792971  | -3.428930 |
| 58            | 6             | 0           | 0.237900                | 5.792971  | 3.428930  |
| 59            | 6             | 0           | 0.205676                | 7.009694  | -4.365537 |
| 60            | 6             | 0           | 0.205676                | 7.009694  | 4.365537  |
| 61            | 6             | 0           | -0.205676               | -7.009694 | 4.365537  |
| 62            | 6             | 0           | -0.205676               | -7.009694 | -4.365537 |
| 63            | 6             | 0           | 2.754058                | -2.159296 | 2.700506  |
| 64            | 1             | 0           | 3.217966                | -1.208082 | 2.983915  |
| 65            | 1             | 0           | 3.383914                | -2.975987 | 3.070331  |
| 66            | 1             | 0           | 2.734984                | -2.219448 | 1.607831  |
| 67            | 6             | 0           | 2.754058                | -2.159296 | -2.700506 |
| 68            | 1             | 0           | 3.383914                | -2.975987 | -3.070331 |
| 69            | 1             | 0           | 3.217966                | -1.208082 | -2.983915 |
| 70            | 1             | 0           | 2.734984                | -2.219448 | -1.607831 |
| 71            | 6             | 0           | -2.754058               | 2.159296  | 2.700506  |
| 72            | 1             | 0           | -3.217966               | 1.208082  | 2.983915  |
| 73            | 1             | 0           | -3.383914               | 2.975987  | 3.070331  |
| 74            | 1             | 0           | -2.734984               | 2.219448  | 1.607831  |
| 75            | 6             | 0           | -2.754058               | 2.159296  | -2.700506 |
| 76            | 1             | 0           | -3.383914               | 2.975987  | -3.070331 |

|     |   |   |           |           |           |
|-----|---|---|-----------|-----------|-----------|
| 77  | 1 | 0 | -3.217966 | 1.208082  | -2.983915 |
| 78  | 1 | 0 | -2.734984 | 2.219448  | -1.607831 |
| 79  | 6 | 0 | -1.452130 | 2.185139  | 4.840955  |
| 80  | 1 | 0 | -0.488293 | 2.322884  | 5.341759  |
| 81  | 1 | 0 | -2.150456 | 2.932317  | 5.227901  |
| 82  | 1 | 0 | -1.853922 | 1.206321  | 5.122442  |
| 83  | 6 | 0 | -1.452130 | 2.185139  | -4.840955 |
| 84  | 1 | 0 | -2.150456 | 2.932317  | -5.227901 |
| 85  | 1 | 0 | -0.488293 | 2.322884  | -5.341759 |
| 86  | 1 | 0 | -1.853922 | 1.206321  | -5.122442 |
| 87  | 6 | 0 | 1.452130  | -2.185139 | -4.840955 |
| 88  | 1 | 0 | 0.488293  | -2.322884 | -5.341759 |
| 89  | 1 | 0 | 1.853922  | -1.206321 | -5.122442 |
| 90  | 1 | 0 | 2.150456  | -2.932317 | -5.227901 |
| 91  | 6 | 0 | 1.452130  | -2.185139 | 4.840955  |
| 92  | 1 | 0 | 1.853922  | -1.206321 | 5.122442  |
| 93  | 1 | 0 | 0.488293  | -2.322884 | 5.341759  |
| 94  | 1 | 0 | 2.150456  | -2.932317 | 5.227901  |
| 95  | 6 | 0 | 0.592233  | 6.574753  | -5.799673 |
| 96  | 1 | 0 | -0.099527 | 5.828005  | -6.203565 |
| 97  | 1 | 0 | 0.574581  | 7.439213  | -6.473173 |
| 98  | 1 | 0 | 1.601130  | 6.147603  | -5.823638 |
| 99  | 6 | 0 | 0.592233  | 6.574753  | 5.799673  |
| 100 | 1 | 0 | 0.574581  | 7.439213  | 6.473173  |
| 101 | 1 | 0 | -0.099527 | 5.828005  | 6.203565  |
| 102 | 1 | 0 | 1.601130  | 6.147603  | 5.823638  |
| 103 | 6 | 0 | -0.592233 | -6.574753 | -5.799673 |
| 104 | 1 | 0 | 0.099527  | -5.828005 | -6.203565 |
| 105 | 1 | 0 | -0.574581 | -7.439213 | -6.473173 |
| 106 | 1 | 0 | -1.601130 | -6.147603 | -5.823638 |
| 107 | 6 | 0 | -0.592233 | -6.574753 | 5.799673  |
| 108 | 1 | 0 | -0.574581 | -7.439213 | 6.473173  |
| 109 | 1 | 0 | 0.099527  | -5.828005 | 6.203565  |
| 110 | 1 | 0 | -1.601130 | -6.147603 | 5.823638  |
| 111 | 6 | 0 | -1.182279 | -8.111506 | -3.912621 |
| 112 | 1 | 0 | -0.958240 | -8.462699 | -2.898876 |
| 113 | 1 | 0 | -2.224263 | -7.772460 | -3.937702 |
| 114 | 1 | 0 | -1.103236 | -8.972302 | -4.584836 |
| 115 | 6 | 0 | -1.182279 | -8.111506 | 3.912621  |
| 116 | 1 | 0 | -2.224263 | -7.772460 | 3.937702  |
| 117 | 1 | 0 | -0.958240 | -8.462699 | 2.898876  |
| 118 | 1 | 0 | -1.103236 | -8.972302 | 4.584836  |
| 119 | 6 | 0 | 1.182279  | 8.111506  | 3.912621  |
| 120 | 1 | 0 | 2.224263  | 7.772460  | 3.937702  |
| 121 | 1 | 0 | 0.958240  | 8.462699  | 2.898876  |
| 122 | 1 | 0 | 1.103236  | 8.972302  | 4.584836  |
| 123 | 6 | 0 | 1.182279  | 8.111506  | -3.912621 |
| 124 | 1 | 0 | 0.958240  | 8.462699  | -2.898876 |
| 125 | 1 | 0 | 2.224263  | 7.772460  | -3.937702 |
| 126 | 1 | 0 | 1.103236  | 8.972302  | -4.584836 |
| 127 | 6 | 0 | -1.224993 | 7.599708  | 4.374831  |
| 128 | 1 | 0 | -1.965502 | 6.870890  | 4.721327  |
| 129 | 1 | 0 | -1.271815 | 8.465800  | 5.044909  |
| 130 | 1 | 0 | -1.522140 | 7.929907  | 3.373110  |
| 131 | 6 | 0 | -1.224993 | 7.599708  | -4.374831 |
| 132 | 1 | 0 | -1.271815 | 8.465800  | -5.044909 |
| 133 | 1 | 0 | -1.965502 | 6.870890  | -4.721327 |
| 134 | 1 | 0 | -1.522140 | 7.929907  | -3.373110 |
| 135 | 6 | 0 | 1.224993  | -7.599708 | -4.374831 |
| 136 | 1 | 0 | 1.965502  | -6.870890 | -4.721327 |
| 137 | 1 | 0 | 1.522140  | -7.929907 | -3.373110 |
| 138 | 1 | 0 | 1.271815  | -8.465800 | -5.044909 |
| 139 | 6 | 0 | 1.224993  | -7.599708 | 4.374831  |
| 140 | 1 | 0 | 1.965502  | -6.870890 | 4.721327  |
| 141 | 1 | 0 | 1.271815  | -8.465800 | 5.044909  |
| 142 | 1 | 0 | 1.522140  | -7.929907 | 3.373110  |

Rotational constants (GHZ): 0.0434529 0.0233362 0.0162877

Standard basis: 6-31G(d) (6D, 7F)

SCF Done: E(UB3LYP) = -2702.07993638 A.U. after 2 cycles

Convg = 0.7944D-08 -V/T = 2.0098

<Sx>= 0.0000 <Sy>= 0.0000 <Sz>= 0.5000 <S\*\*2>= 0.7667 S= 0.5083

<L.S>= 0.000000000000E+00

Annihilation of the first spin contaminant:

S\*\*2 before annihilation 0.7667, after 0.7502

| Item                 | Value    | Threshold | Converged? |
|----------------------|----------|-----------|------------|
| Maximum Force        | 0.000000 | 0.000015  | YES        |
| RMS Force            | 0.000000 | 0.000010  | YES        |
| Maximum Displacement | 0.000043 | 0.000060  | YES        |
| RMS Displacement     | 0.000008 | 0.000040  | YES        |

Predicted change in Energy=-1.300174D-11

Optimization completed.

-- Stationary point found.



# Radical cation of conjoined [5]helicene, chiral, $D_2$ at UB3LYP/6-31G(d) in DCM

Stoichiometry C64H74N4(1+,2)  
 Framework group D2[C2(HCC.CCH),X(C60H72N4)]  
 Deg. of freedom 105  
 Full point group D2 NOp 4  
 Largest Abelian subgroup D2 NOp 4  
 Largest concise Abelian subgroup D2 NOp 4  
 Standard orientation:

| Center Number | Atomic Number | Atomic Type | Coordinates (Angstroms) |           |           |
|---------------|---------------|-------------|-------------------------|-----------|-----------|
|               |               |             | X                       | Y         | Z         |
| 1             | 7             | 0           | 2.412000                | 0.111999  | 0.690051  |
| 2             | 7             | 0           | -2.412000               | -0.111999 | 0.690051  |
| 3             | 6             | 0           | 5.455466                | 2.452612  | 2.498157  |
| 4             | 6             | 0           | 4.541564                | 1.695309  | 3.251869  |
| 5             | 1             | 0           | 4.613913                | 1.727903  | 4.331880  |
| 6             | 6             | 0           | 3.551858                | 0.894354  | 2.680611  |
| 7             | 6             | 0           | 2.600950                | 0.012626  | 3.511744  |
| 8             | 6             | 0           | 1.238851                | 0.032807  | 2.810115  |
| 9             | 6             | 0           | 0.000000                | 0.000000  | 3.466627  |
| 10            | 1             | 0           | 0.000000                | 0.000000  | 4.548165  |
| 11            | 6             | 0           | -1.238851               | -0.032807 | 2.810115  |
| 12            | 6             | 0           | -2.600950               | -0.012626 | 3.511744  |
| 13            | 6             | 0           | -3.551858               | -0.894354 | 2.680611  |
| 14            | 6             | 0           | -4.541564               | -1.695309 | 3.251869  |
| 15            | 1             | 0           | -4.613913               | -1.727903 | 4.331880  |
| 16            | 6             | 0           | -5.455466               | -2.452612 | 2.498157  |
| 17            | 6             | 0           | -5.339164               | -2.389608 | 1.104537  |
| 18            | 1             | 0           | -6.008892               | -2.954898 | 0.467426  |
| 19            | 6             | 0           | -4.354454               | -1.617805 | 0.492685  |
| 20            | 1             | 0           | -4.276666               | -1.608025 | -0.586848 |
| 21            | 6             | 0           | -3.463703               | -0.878743 | 1.271862  |
| 22            | 6             | 0           | -1.217473               | -0.016945 | 1.411964  |
| 23            | 6             | 0           | 0.000000                | 0.000000  | 0.709932  |
| 24            | 6             | 0           | 1.217473                | 0.016945  | 1.411964  |
| 25            | 6             | 0           | 3.463703                | 0.878743  | 1.271862  |
| 26            | 6             | 0           | 4.354454                | 1.617805  | 0.492685  |
| 27            | 6             | 0           | 5.339164                | 2.389608  | 1.104537  |
| 28            | 1             | 0           | 6.008892                | 2.954898  | 0.467426  |
| 29            | 6             | 0           | 3.134754                | -1.449496 | 3.514001  |
| 30            | 1             | 0           | 3.178175                | -1.870231 | 2.505247  |
| 31            | 1             | 0           | 2.476474                | -2.086724 | 4.114831  |
| 32            | 1             | 0           | 4.141279                | -1.483750 | 3.944689  |
| 33            | 6             | 0           | 2.501139                | 0.483935  | 4.973116  |
| 34            | 1             | 0           | 2.140359                | 1.514976  | 5.047957  |
| 35            | 1             | 0           | 3.474103                | 0.419126  | 5.467626  |
| 36            | 1             | 0           | 1.826313                | -0.163165 | 5.540404  |
| 37            | 6             | 0           | -2.501139               | -0.483935 | 4.973116  |
| 38            | 1             | 0           | -2.140359               | -1.514976 | 5.047957  |
| 39            | 1             | 0           | -3.474103               | -0.419126 | 5.467626  |
| 40            | 1             | 0           | -1.826313               | 0.163165  | 5.540404  |
| 41            | 6             | 0           | -3.134754               | 1.449496  | 3.514001  |
| 42            | 1             | 0           | -3.178175               | 1.870231  | 2.505247  |
| 43            | 1             | 0           | -2.476474               | 2.086724  | 4.114831  |
| 44            | 1             | 0           | -4.141279               | 1.483750  | 3.944689  |
| 45            | 1             | 0           | 4.276666                | 1.608025  | -0.586848 |
| 46            | 6             | 0           | 0.000000                | 0.000000  | -0.709932 |
| 47            | 6             | 0           | -1.217473               | 0.016945  | -1.411964 |
| 48            | 7             | 0           | -2.412000               | 0.111999  | -0.690051 |
| 49            | 7             | 0           | 2.412000                | -0.111999 | -0.690051 |
| 50            | 6             | 0           | 1.217473                | -0.016945 | -1.411964 |
| 51            | 6             | 0           | -1.238851               | 0.032807  | -2.810115 |
| 52            | 6             | 0           | 1.238851                | -0.032807 | -2.810115 |
| 53            | 6             | 0           | 0.000000                | 0.000000  | -3.466627 |
| 54            | 1             | 0           | 0.000000                | 0.000000  | -4.548165 |
| 55            | 6             | 0           | 2.600950                | -0.012626 | -3.511744 |
| 56            | 6             | 0           | -2.600950               | 0.012626  | -3.511744 |
| 57            | 6             | 0           | 3.551858                | -0.894354 | -2.680611 |
| 58            | 6             | 0           | -3.551858               | 0.894354  | -2.680611 |
| 59            | 6             | 0           | -3.463703               | 0.878743  | -1.271862 |
| 60            | 6             | 0           | 3.463703                | -0.878743 | -1.271862 |
| 61            | 6             | 0           | -4.541564               | 1.695309  | -3.251869 |
| 62            | 1             | 0           | -4.613913               | 1.727903  | -4.331880 |
| 63            | 6             | 0           | 4.541564                | -1.695309 | -3.251869 |
| 64            | 1             | 0           | 4.613913                | -1.727903 | -4.331880 |
| 65            | 6             | 0           | 5.455466                | -2.452612 | -2.498157 |
| 66            | 6             | 0           | 5.339164                | -2.389608 | -1.104537 |
| 67            | 1             | 0           | 6.008892                | -2.954898 | -0.467426 |
| 68            | 6             | 0           | 4.354454                | -1.617805 | -0.492685 |
| 69            | 1             | 0           | 4.276666                | -1.608025 | 0.586848  |
| 70            | 6             | 0           | -5.455466               | 2.452612  | -2.498157 |
| 71            | 6             | 0           | -5.339164               | 2.389608  | -1.104537 |
| 72            | 6             | 0           | -4.354454               | 1.617805  | -0.492685 |
| 73            | 1             | 0           | -4.276666               | 1.608025  | 0.586848  |
| 74            | 1             | 0           | -6.008892               | 2.954898  | -0.467426 |
| 75            | 6             | 0           | -3.134754               | -1.449496 | -3.514001 |
| 76            | 1             | 0           | -3.178175               | -1.870231 | -2.505247 |
| 77            | 1             | 0           | -4.141279               | -1.483750 | -3.944689 |
| 78            | 1             | 0           | -2.476474               | -2.086724 | -4.114831 |
| 79            | 6             | 0           | -2.501139               | 0.483935  | -4.973116 |

|     |   |   |           |           |           |
|-----|---|---|-----------|-----------|-----------|
| 80  | 1 | 0 | -2.140359 | 1.514976  | -5.047957 |
| 81  | 1 | 0 | -1.826313 | -0.163165 | -5.540404 |
| 82  | 1 | 0 | -3.474103 | 0.419126  | -5.467626 |
| 83  | 6 | 0 | 2.501139  | -0.483935 | -4.973116 |
| 84  | 1 | 0 | 2.140359  | -1.514976 | -5.047957 |
| 85  | 1 | 0 | 1.826313  | 0.163165  | -5.540404 |
| 86  | 1 | 0 | 3.474103  | -0.419126 | -5.467626 |
| 87  | 6 | 0 | 3.134754  | 1.449496  | -3.514001 |
| 88  | 1 | 0 | 2.476474  | 2.086724  | -4.114831 |
| 89  | 1 | 0 | 3.178175  | 1.870231  | -2.505247 |
| 90  | 1 | 0 | 4.141279  | 1.483750  | -3.944689 |
| 91  | 6 | 0 | 6.522882  | -3.299854 | -3.212730 |
| 92  | 6 | 0 | -6.522882 | 3.299854  | -3.212730 |
| 93  | 6 | 0 | -6.522882 | -3.299854 | 3.212730  |
| 94  | 6 | 0 | 6.522882  | 3.299854  | 3.212730  |
| 95  | 6 | 0 | 5.829832  | -4.335221 | -4.130925 |
| 96  | 1 | 0 | 5.209881  | -3.854925 | -4.895356 |
| 97  | 1 | 0 | 6.581807  | -4.943836 | -4.647044 |
| 98  | 1 | 0 | 5.188363  | -5.008022 | -3.550250 |
| 99  | 6 | 0 | 7.424183  | -2.378481 | -4.069504 |
| 100 | 1 | 0 | 8.186870  | -2.972348 | -4.587070 |
| 101 | 1 | 0 | 6.850997  | -1.837488 | -4.829892 |
| 102 | 1 | 0 | 7.936006  | -1.638747 | -3.443330 |
| 103 | 6 | 0 | 7.419889  | -4.062297 | -2.219036 |
| 104 | 1 | 0 | 7.966717  | -3.381782 | -1.556572 |
| 105 | 1 | 0 | 6.842624  | -4.756399 | -1.597511 |
| 106 | 1 | 0 | 8.160099  | -4.651550 | -2.771179 |
| 107 | 6 | 0 | -7.419889 | 4.062297  | -2.219036 |
| 108 | 1 | 0 | -7.966717 | 3.381782  | -1.556572 |
| 109 | 1 | 0 | -6.842624 | 4.756399  | -1.597511 |
| 110 | 1 | 0 | -8.160099 | 4.651550  | -2.771179 |
| 111 | 6 | 0 | -5.829832 | 4.335221  | -4.130925 |
| 112 | 1 | 0 | -5.188363 | 5.008022  | -3.550250 |
| 113 | 1 | 0 | -5.209881 | 3.854925  | -4.895356 |
| 114 | 1 | 0 | -6.581807 | 4.943836  | -4.647044 |
| 115 | 6 | 0 | -7.424183 | 2.378481  | -4.069504 |
| 116 | 1 | 0 | -6.850997 | 1.837488  | -4.829892 |
| 117 | 1 | 0 | -7.936006 | 1.638747  | -3.443330 |
| 118 | 1 | 0 | -8.186870 | 2.972348  | -4.587070 |
| 119 | 6 | 0 | -5.829832 | -4.335221 | 4.130925  |
| 120 | 1 | 0 | -5.209881 | -3.854925 | 4.895356  |
| 121 | 1 | 0 | -6.581807 | -4.943836 | 4.647044  |
| 122 | 1 | 0 | -5.188363 | -5.008022 | 3.550250  |
| 123 | 6 | 0 | -7.419889 | -4.062297 | 2.219036  |
| 124 | 1 | 0 | -7.966717 | -3.381782 | 1.556572  |
| 125 | 1 | 0 | -6.842624 | -4.756399 | 1.597511  |
| 126 | 1 | 0 | -8.160099 | -4.651550 | 2.771179  |
| 127 | 6 | 0 | -7.424183 | -2.378481 | 4.069504  |
| 128 | 1 | 0 | -6.850997 | -1.837488 | 4.829892  |
| 129 | 1 | 0 | -7.936006 | -1.638747 | 3.443330  |
| 130 | 1 | 0 | -8.186870 | -2.972348 | 4.587070  |
| 131 | 6 | 0 | 7.424183  | 2.378481  | 4.069504  |
| 132 | 1 | 0 | 8.186870  | 2.972348  | 4.587070  |
| 133 | 1 | 0 | 6.850997  | 1.837488  | 4.829892  |
| 134 | 1 | 0 | 7.936006  | 1.638747  | 3.443330  |
| 135 | 6 | 0 | 7.419889  | 4.062297  | 2.219036  |
| 136 | 1 | 0 | 7.966717  | 3.381782  | 1.556572  |
| 137 | 1 | 0 | 6.842624  | 4.756399  | 1.597511  |
| 138 | 1 | 0 | 8.160099  | 4.651550  | 2.771179  |
| 139 | 6 | 0 | 5.829832  | 4.335221  | 4.130925  |
| 140 | 1 | 0 | 5.188363  | 5.008022  | 3.550250  |
| 141 | 1 | 0 | 5.209881  | 3.854925  | 4.895356  |
| 142 | 1 | 0 | 6.581807  | 4.943836  | 4.647044  |

Rotational constants (GHZ): 0.0417322 0.0220665 0.0189270

Standard basis: G-31G(d) (6D, 7F)

Error on total polarization charges = 0.01738

SCF Done: E(UB3LYP) = -2702.27048330 A.U. after 6 cycles

Convg = 0.4782D-08 -V/T = 2.0098

<Sx>= 0.0000 <Sy>= 0.0000 <Sz>= 0.5000 <S\*\*2>= 0.7599 S= 0.5049

<L.S>= 0.000000000000E+00

Annihilation of the first spin contaminant:

| Item                 | S**2 before annihilation | Value    | after  | Threshold | Converged? |
|----------------------|--------------------------|----------|--------|-----------|------------|
| Maximum Force        | 0.000001                 | 0.000001 | 0.7501 | 0.000450  | YES        |
| RMS Force            | 0.000000                 | 0.000000 |        | 0.000300  | YES        |
| Maximum Displacement | 0.001023                 | 0.001023 |        | 0.001800  | YES        |
| RMS Displacement     | 0.000233                 | 0.000233 |        | 0.001200  | YES        |

Predicted change in Energy=-2.092662D-09

Optimization completed.

-- Stationary point found.

# Radical cation of conjoined [5]helicene, meso, C<sub>2h</sub> at UB3LYP/6-31G(d) in DCM

Stoichiometry C64H74N4(1+,2)  
 Framework group C2H[SGH(C4H2),X(C60H72N4)]  
 Deg. of freedom 107  
 Full point group C2H NOp 4  
 Largest Abelian subgroup C2H NOp 4  
 Largest concise Abelian subgroup C2H NOp 4  
 Standard orientation:

| Center Number | Atomic Number | Atomic Type | Coordinates (Angstroms) |           |           |
|---------------|---------------|-------------|-------------------------|-----------|-----------|
|               |               |             | X                       | Y         | Z         |
| 1             | 7             | 0           | -0.645303               | 0.266450  | 2.411916  |
| 2             | 7             | 0           | -0.645303               | 0.266450  | -2.411916 |
| 3             | 6             | 0           | -3.393311               | -0.832964 | 5.457034  |
| 4             | 6             | 0           | -3.660776               | 0.199234  | 4.541300  |
| 5             | 1             | 0           | -4.607645               | 0.719669  | 4.614259  |
| 6             | 6             | 0           | -2.763428               | 0.598239  | 3.549979  |
| 7             | 6             | 0           | -3.033883               | 1.776611  | 2.597470  |
| 8             | 6             | 0           | -2.441540               | 1.393035  | 1.238818  |
| 9             | 6             | 0           | -3.022532               | 1.696455  | 0.000000  |
| 10            | 1             | 0           | -3.976319               | 2.206345  | 0.000000  |
| 11            | 6             | 0           | -2.441540               | 1.393035  | -1.238818 |
| 12            | 6             | 0           | -3.033883               | 1.776611  | -2.597470 |
| 13            | 6             | 0           | -2.763428               | 0.598239  | -3.549979 |
| 14            | 6             | 0           | -3.660776               | 0.199234  | -4.541300 |
| 15            | 1             | 0           | -4.607645               | 0.719669  | -4.614259 |
| 16            | 6             | 0           | -3.393311               | -0.832964 | -5.457034 |
| 17            | 6             | 0           | -2.162385               | -1.488766 | -5.336012 |
| 18            | 1             | 0           | -1.899586               | -2.299092 | -6.005569 |
| 19            | 6             | 0           | -1.245727               | -1.135404 | -4.348782 |
| 20            | 1             | 0           | -0.311759               | -1.676298 | -4.268846 |
| 21            | 6             | 0           | -1.541643               | -0.101559 | -3.459249 |
| 22            | 6             | 0           | -1.207431               | 0.732901  | -1.218427 |
| 23            | 6             | 0           | -0.590588               | 0.395291  | 0.000000  |
| 24            | 6             | 0           | -1.207431               | 0.732901  | 1.218427  |
| 25            | 6             | 0           | -1.541643               | -0.101559 | 3.459249  |
| 26            | 6             | 0           | -1.245727               | -1.135404 | 4.348782  |
| 27            | 6             | 0           | -2.162385               | -1.488766 | 5.336012  |
| 28            | 1             | 0           | -1.899586               | -2.299092 | 6.005569  |
| 29            | 6             | 0           | -4.531976               | 2.112808  | 2.498724  |
| 30            | 1             | 0           | -5.120875               | 1.262762  | 2.138848  |
| 31            | 1             | 0           | -4.692106               | 2.958300  | 1.823561  |
| 32            | 1             | 0           | -4.923763               | 2.419022  | 3.472309  |
| 33            | 6             | 0           | -2.292581               | 3.039011  | 3.125455  |
| 34            | 1             | 0           | -1.210227               | 2.887928  | 3.172267  |
| 35            | 1             | 0           | -2.647889               | 3.293018  | 4.129959  |
| 36            | 1             | 0           | -2.483475               | 3.890239  | 2.462528  |
| 37            | 6             | 0           | -4.531976               | 2.112808  | -2.498724 |
| 38            | 1             | 0           | -5.120875               | 1.262762  | -2.138848 |
| 39            | 1             | 0           | -4.923763               | 2.419022  | -3.472309 |
| 40            | 1             | 0           | -4.692106               | 2.958300  | -1.823561 |
| 41            | 6             | 0           | -2.292581               | 3.039011  | -3.125455 |
| 42            | 1             | 0           | -1.210227               | 2.887928  | -3.172267 |
| 43            | 1             | 0           | -2.483475               | 3.890239  | -2.462528 |
| 44            | 1             | 0           | -2.647889               | 3.293018  | -4.129959 |
| 45            | 1             | 0           | -0.311759               | -1.676298 | 4.268846  |
| 46            | 6             | 0           | 0.590588                | -0.395291 | 0.000000  |
| 47            | 6             | 0           | 1.207431                | -0.732901 | -1.218427 |
| 48            | 7             | 0           | 0.645303                | -0.266450 | -2.411916 |
| 49            | 7             | 0           | 0.645303                | -0.266450 | 2.411916  |
| 50            | 6             | 0           | 1.207431                | -0.732901 | 1.218427  |
| 51            | 6             | 0           | 2.441540                | -1.393035 | -1.238818 |
| 52            | 6             | 0           | 2.441540                | -1.393035 | 1.238818  |
| 53            | 6             | 0           | 3.022532                | -1.696455 | 0.000000  |
| 54            | 1             | 0           | 3.976319                | -2.206345 | 0.000000  |
| 55            | 6             | 0           | 3.033883                | -1.776611 | -2.597470 |
| 56            | 6             | 0           | 3.033883                | -1.776611 | 2.597470  |
| 57            | 6             | 0           | 2.763428                | -0.598239 | 3.549979  |
| 58            | 6             | 0           | 2.763428                | -0.598239 | -3.549979 |
| 59            | 6             | 0           | 1.541643                | 0.101559  | -3.459249 |
| 60            | 6             | 0           | 3.660776                | -0.199234 | -4.541300 |
| 61            | 1             | 0           | 4.607645                | -0.719669 | -4.614259 |
| 62            | 6             | 0           | 3.393311                | 0.832964  | -5.457034 |
| 63            | 6             | 0           | 2.162385                | 1.488766  | -5.336012 |
| 64            | 1             | 0           | 1.899586                | 2.299092  | -6.005569 |
| 65            | 6             | 0           | 1.245727                | 1.135404  | -4.348782 |
| 66            | 1             | 0           | 0.311759                | 1.676298  | -4.268846 |
| 67            | 6             | 0           | 1.541643                | 0.101559  | 3.459249  |
| 68            | 6             | 0           | 3.660776                | -0.199234 | 4.541300  |
| 69            | 1             | 0           | 4.607645                | -0.719669 | 4.614259  |
| 70            | 6             | 0           | 3.393311                | 0.832964  | 5.457034  |
| 71            | 6             | 0           | 2.162385                | 1.488766  | 5.336012  |
| 72            | 1             | 0           | 1.899586                | 2.299092  | 6.005569  |
| 73            | 6             | 0           | 1.245727                | 1.135404  | 4.348782  |
| 74            | 1             | 0           | 0.311759                | 1.676298  | 4.268846  |
| 75            | 6             | 0           | 2.292581                | -3.039011 | -3.125455 |
| 76            | 1             | 0           | 1.210227                | -2.887928 | -3.172267 |
| 77            | 1             | 0           | 2.647889                | -3.293018 | -4.129959 |
| 78            | 1             | 0           | 2.483475                | -3.890239 | -2.462528 |
| 79            | 6             | 0           | 4.531976                | -2.112808 | -2.498724 |
| 80            | 1             | 0           | 5.120875                | -1.262762 | -2.138848 |

|     |   |   |           |           |           |
|-----|---|---|-----------|-----------|-----------|
| 81  | 1 | 0 | 4.692106  | -2.958300 | -1.823561 |
| 82  | 1 | 0 | 4.923763  | -2.419022 | -3.472309 |
| 83  | 6 | 0 | 4.531976  | -2.112808 | 2.498724  |
| 84  | 1 | 0 | 4.692106  | -2.958300 | 1.823561  |
| 85  | 1 | 0 | 5.120875  | -1.262762 | 2.138848  |
| 86  | 1 | 0 | 4.923763  | -2.419022 | 3.472309  |
| 87  | 6 | 0 | 2.292581  | -3.039011 | 3.125455  |
| 88  | 1 | 0 | 2.647889  | -3.293018 | 4.129959  |
| 89  | 1 | 0 | 1.210227  | -2.887928 | 3.172267  |
| 90  | 1 | 0 | 2.483475  | -3.890239 | 2.462528  |
| 91  | 6 | 0 | -4.435557 | -1.194505 | -6.530035 |
| 92  | 6 | 0 | 4.435557  | 1.194505  | -6.530035 |
| 93  | 6 | 0 | -4.435557 | -1.194505 | 6.530035  |
| 94  | 6 | 0 | 4.435557  | 1.194505  | 6.530035  |
| 95  | 6 | 0 | -3.952343 | -2.331138 | -7.450535 |
| 96  | 1 | 0 | -3.035605 | -2.060117 | -7.986478 |
| 97  | 1 | 0 | -3.764553 | -3.256338 | -6.893993 |
| 98  | 1 | 0 | -4.721911 | -2.546991 | -8.199567 |
| 99  | 6 | 0 | -3.952343 | -2.331138 | 7.450535  |
| 100 | 1 | 0 | -3.764553 | -3.256338 | 6.893993  |
| 101 | 1 | 0 | -3.035605 | -2.060117 | 7.986478  |
| 102 | 1 | 0 | -4.721911 | -2.546991 | 8.199567  |
| 103 | 6 | 0 | 3.952343  | 2.331138  | 7.450535  |
| 104 | 1 | 0 | 3.764553  | 3.256338  | 6.893993  |
| 105 | 1 | 0 | 3.035605  | 2.060117  | 7.986478  |
| 106 | 1 | 0 | 4.721911  | 2.546991  | 8.199567  |
| 107 | 6 | 0 | 3.952343  | 2.331138  | -7.450535 |
| 108 | 1 | 0 | 3.035605  | 2.060117  | -7.986478 |
| 109 | 1 | 0 | 3.764553  | 3.256338  | -6.893993 |
| 110 | 1 | 0 | 4.721911  | 2.546991  | -8.199567 |
| 111 | 6 | 0 | -4.725700 | 0.046622  | 7.408416  |
| 112 | 1 | 0 | -5.117361 | 0.883165  | 6.820055  |
| 113 | 1 | 0 | -5.471851 | -0.199863 | 8.173006  |
| 114 | 1 | 0 | -3.817376 | 0.388411  | 7.917780  |
| 115 | 6 | 0 | -5.744341 | -1.650739 | 5.841751  |
| 116 | 1 | 0 | -6.165566 | -0.866464 | 5.203845  |
| 117 | 1 | 0 | -5.572114 | -2.535913 | 5.218768  |
| 118 | 1 | 0 | -6.497728 | -1.907198 | 6.596092  |
| 119 | 6 | 0 | -4.725700 | 0.046622  | -7.408416 |
| 120 | 1 | 0 | -5.471851 | -0.199863 | -8.173006 |
| 121 | 1 | 0 | -5.117361 | 0.883165  | -6.820055 |
| 122 | 1 | 0 | -3.817376 | 0.388411  | -7.917780 |
| 123 | 6 | 0 | -5.744341 | -1.650739 | -5.841751 |
| 124 | 1 | 0 | -5.572114 | -2.535913 | -5.218768 |
| 125 | 1 | 0 | -6.165566 | -0.866464 | -5.203845 |
| 126 | 1 | 0 | -6.497728 | -1.907198 | -6.596092 |
| 127 | 6 | 0 | 4.725700  | -0.046622 | -7.408416 |
| 128 | 1 | 0 | 5.471851  | 0.199863  | -8.173006 |
| 129 | 1 | 0 | 5.117361  | -0.883165 | -6.820055 |
| 130 | 1 | 0 | 3.817376  | -0.388411 | -7.917780 |
| 131 | 6 | 0 | 5.744341  | 1.650739  | -5.841751 |
| 132 | 1 | 0 | 5.572114  | 2.535913  | -5.218768 |
| 133 | 1 | 0 | 6.165566  | 0.866464  | -5.203845 |
| 134 | 1 | 0 | 6.497728  | 1.907198  | -6.596092 |
| 135 | 6 | 0 | 4.725700  | -0.046622 | 7.408416  |
| 136 | 1 | 0 | 5.117361  | -0.883165 | 6.820055  |
| 137 | 1 | 0 | 5.471851  | 0.199863  | 8.173006  |
| 138 | 1 | 0 | 3.817376  | -0.388411 | 7.917780  |
| 139 | 6 | 0 | 5.744341  | 1.650739  | 5.841751  |
| 140 | 1 | 0 | 6.165566  | 0.866464  | 5.203845  |
| 141 | 1 | 0 | 5.572114  | 2.535913  | 5.218768  |
| 142 | 1 | 0 | 6.497728  | 1.907198  | 6.596092  |

Rotational constants (GHZ): 0.0418295 0.0242614 0.0175621

Standard basis: 6-31G(d) (6D, 7F)

Error on total polarization charges = 0.01737

SCF Done: E(UB3LYP) = -2702.27058593 A.U. after 5 cycles

Convg = 0.8387D-08 -V/T = 2.0098

<Sx>= 0.0000 <Sy>= 0.0000 <Sz>= 0.5000 <S\*\*2>= 0.7599 S= 0.5049

<L.S>= 0.000000000000E+00

Annihilation of the first spin contaminant:

S\*\*2 before annihilation 0.7599, after 0.7501

| Item                 | Value    | Threshold | Converged? |
|----------------------|----------|-----------|------------|
| Maximum Force        | 0.000001 | 0.000450  | YES        |
| RMS Force            | 0.000000 | 0.000300  | YES        |
| Maximum Displacement | 0.000906 | 0.001800  | YES        |
| RMS Displacement     | 0.000185 | 0.001200  | YES        |

Predicted change in Energy=-2.030615D-09

Optimization completed.

-- Stationary point found.

# C<sub>1</sub>-symmetric transition state for radical cation of conjoined [5]helicene, from chiral D<sub>2</sub> structure to meso C<sub>2h</sub> structure at UB3LYP/6-31G(d) in the gas phase

Stoichiometry C64H74N4(1+,2)  
 Framework group C1[X(C64H74N4)]  
 Deg. of freedom 420  
 Full point group C1 NOp 1  
 Largest Abelian subgroup C1 NOp 1  
 Largest concise Abelian subgroup C1 NOp 1  
 Standard orientation:

| Center Number | Atomic Number | Atomic Type | Coordinates (Angstroms) |           |           |
|---------------|---------------|-------------|-------------------------|-----------|-----------|
|               |               |             | X                       | Y         | Z         |
| 1             | 7             | 0           | 2.346953                | -0.706833 | 0.282495  |
| 2             | 7             | 0           | -2.507866               | -0.734023 | 0.370666  |
| 3             | 6             | 0           | 1.141253                | -2.809056 | 0.023586  |
| 4             | 6             | 0           | -0.068903               | -3.476885 | 0.252259  |
| 5             | 1             | 0           | -0.083591               | -4.555547 | 0.163922  |
| 6             | 6             | 0           | -1.277144               | -2.826673 | 0.554778  |
| 7             | 6             | 0           | -2.594950               | -3.525817 | 0.878632  |
| 8             | 6             | 0           | -3.661114               | -2.853037 | -0.000573 |
| 9             | 6             | 0           | -4.711307               | -3.559528 | -0.588307 |
| 10            | 1             | 0           | -4.748566               | -4.632958 | -0.446461 |
| 11            | 6             | 0           | -5.727733               | -2.949324 | -1.341326 |
| 12            | 6             | 0           | -5.648330               | -1.562231 | -1.497277 |
| 13            | 1             | 0           | -6.401060               | -1.027555 | -2.064572 |
| 14            | 6             | 0           | -4.606042               | -0.822245 | -0.941439 |
| 15            | 1             | 0           | -4.582602               | 0.248196  | -1.088202 |
| 16            | 6             | 0           | -3.606550               | -1.458156 | -0.205127 |
| 17            | 6             | 0           | -1.291879               | -1.423748 | 0.470766  |
| 18            | 6             | 0           | -0.081458               | -0.731180 | 0.322397  |
| 19            | 6             | 0           | 1.136817                | -1.425607 | 0.229618  |
| 20            | 6             | 0           | -2.517861               | -5.045527 | 0.663283  |
| 21            | 1             | 0           | -2.325530               | -5.307334 | -0.382701 |
| 22            | 1             | 0           | -3.451384               | -5.525663 | 0.968773  |
| 23            | 1             | 0           | -1.727337               | -5.479668 | 1.283798  |
| 24            | 6             | 0           | -2.934768               | -3.270082 | 2.376028  |
| 25            | 1             | 0           | -2.978785               | -2.201488 | 2.605921  |
| 26            | 1             | 0           | -2.176490               | -3.726075 | 3.022644  |
| 27            | 1             | 0           | -3.907994               | -3.710449 | 2.617361  |
| 28            | 6             | 0           | -0.086569               | 0.609736  | -0.147464 |
| 29            | 6             | 0           | -1.307920               | 1.261383  | -0.353869 |
| 30            | 7             | 0           | -2.471513               | 0.661726  | 0.138878  |
| 31            | 7             | 0           | 2.339166                | 0.631573  | -0.198305 |
| 32            | 6             | 0           | 1.107433                | 1.174003  | -0.604026 |
| 33            | 6             | 0           | -1.342848               | 2.530955  | -0.926421 |
| 34            | 6             | 0           | 1.069197                | 2.301198  | -1.445072 |
| 35            | 6             | 0           | -0.145648               | 2.986355  | -1.521502 |
| 36            | 1             | 0           | -0.180376               | 3.902472  | -2.098359 |
| 37            | 6             | 0           | -2.688552               | 3.264709  | -0.964130 |
| 38            | 6             | 0           | -3.485097               | 2.846281  | 0.296214  |
| 39            | 6             | 0           | -3.396568               | 1.523188  | 0.785116  |
| 40            | 6             | 0           | -4.356152               | 3.712253  | 0.958934  |
| 41            | 1             | 0           | -4.430196               | 4.734684  | 0.608467  |
| 42            | 6             | 0           | -5.156386               | 3.325001  | 2.048487  |
| 43            | 6             | 0           | -5.050300               | 1.997260  | 2.475940  |
| 44            | 6             | 0           | -4.178825               | 1.101942  | 1.857968  |
| 45            | 1             | 0           | -4.099717               | 0.081958  | 2.216963  |
| 46            | 1             | 0           | -5.641391               | 1.638703  | 3.310530  |
| 47            | 6             | 0           | -3.466396               | 2.817844  | -2.234834 |
| 48            | 1             | 0           | -3.579217               | 1.731150  | -2.280801 |
| 49            | 1             | 0           | -4.464714               | 3.268438  | -2.244952 |
| 50            | 1             | 0           | -2.933898               | 3.136940  | -3.138279 |
| 51            | 6             | 0           | -2.485612               | 4.790263  | -1.033188 |
| 52            | 1             | 0           | -1.962096               | 5.171533  | -0.150525 |
| 53            | 1             | 0           | -1.911720               | 5.066550  | -1.922657 |
| 54            | 1             | 0           | -3.444826               | 5.308141  | -1.117776 |
| 55            | 6             | 0           | -6.095288               | 4.348885  | 2.711856  |
| 56            | 6             | 0           | -6.861445               | -3.800842 | -1.939990 |
| 57            | 6             | 0           | -6.904382               | 3.730623  | 3.867863  |
| 58            | 1             | 0           | -7.540962               | 2.906337  | 3.526425  |
| 59            | 1             | 0           | -6.255893               | 3.355896  | 4.667993  |
| 60            | 1             | 0           | -7.559238               | 4.491248  | 4.306236  |
| 61            | 6             | 0           | -5.257809               | 5.519516  | 3.280176  |
| 62            | 1             | 0           | -4.547186               | 5.164224  | 4.035106  |
| 63            | 1             | 0           | -4.687129               | 6.032395  | 2.498431  |
| 64            | 1             | 0           | -5.912380               | 6.261082  | 3.753107  |
| 65            | 6             | 0           | -7.094601               | 4.894579  | 1.663746  |
| 66            | 1             | 0           | -6.586368               | 5.395761  | 0.832929  |
| 67            | 1             | 0           | -7.706173               | 4.087214  | 1.245370  |
| 68            | 1             | 0           | -7.767994               | 5.624698  | 2.127427  |
| 69            | 6             | 0           | -6.262217               | -4.859226 | -2.896869 |
| 70            | 1             | 0           | -5.567899               | -5.531657 | -2.381739 |
| 71            | 1             | 0           | -7.060208               | -5.474869 | -3.327899 |
| 72            | 1             | 0           | -5.718928               | -4.383089 | -3.721078 |
| 73            | 6             | 0           | -7.868481               | -2.948721 | -2.735313 |
| 74            | 1             | 0           | -8.358373               | -2.199162 | -2.103594 |
| 75            | 1             | 0           | -7.392487               | -2.432013 | -3.576552 |
| 76            | 1             | 0           | -8.651921               | -3.593991 | -3.146833 |
| 77            | 6             | 0           | -7.626445               | -4.515245 | -0.800033 |
| 78            | 1             | 0           | -6.974032               | -5.178703 | -0.222214 |

|     |   |   |           |           |           |
|-----|---|---|-----------|-----------|-----------|
| 79  | 1 | 0 | -8.066368 | -3.789713 | -0.106578 |
| 80  | 1 | 0 | -8.438345 | -5.125684 | -1.212323 |
| 81  | 6 | 0 | 2.317689  | 2.566555  | -2.290218 |
| 82  | 6 | 0 | 2.395349  | -3.412849 | -0.619655 |
| 83  | 6 | 0 | 3.449257  | 1.556299  | -0.235407 |
| 84  | 6 | 0 | 3.505317  | -1.500489 | 0.646202  |
| 85  | 6 | 0 | 4.329451  | 1.758233  | 0.829287  |
| 86  | 6 | 0 | 4.390217  | -1.141345 | 1.666409  |
| 87  | 6 | 0 | 3.496981  | 2.474046  | -1.316315 |
| 88  | 6 | 0 | 3.584555  | -2.822699 | 0.142608  |
| 89  | 6 | 0 | 4.697727  | -3.592042 | 0.480274  |
| 90  | 6 | 0 | 4.573966  | 3.356985  | -1.382598 |
| 91  | 6 | 0 | 5.484062  | -1.937228 | 1.994838  |
| 92  | 6 | 0 | 5.385538  | 2.660453  | 0.739810  |
| 93  | 6 | 0 | 5.572738  | 3.445870  | -0.399511 |
| 94  | 6 | 0 | 5.702614  | -3.163042 | 1.361700  |
| 95  | 1 | 0 | 4.770782  | -4.588471 | 0.063010  |
| 96  | 1 | 0 | 6.146801  | -1.590972 | 2.779100  |
| 97  | 1 | 0 | 4.198027  | -0.279575 | 2.279088  |
| 98  | 1 | 0 | 4.158893  | 1.278540  | 1.773400  |
| 99  | 1 | 0 | 6.044415  | 2.756066  | 1.594584  |
| 100 | 1 | 0 | 4.623279  | 4.032011  | -2.227692 |
| 101 | 6 | 0 | 2.433751  | 1.458463  | -3.376813 |
| 102 | 1 | 0 | 2.496624  | 0.458391  | -2.937475 |
| 103 | 1 | 0 | 1.565101  | 1.484579  | -4.043445 |
| 104 | 1 | 0 | 3.336515  | 1.618584  | -3.976063 |
| 105 | 6 | 0 | 2.242471  | 3.925203  | -3.006282 |
| 106 | 1 | 0 | 1.356427  | 3.961011  | -3.647385 |
| 107 | 1 | 0 | 2.196019  | 4.761040  | -2.300801 |
| 108 | 1 | 0 | 3.104404  | 4.073378  | -3.662509 |
| 109 | 6 | 0 | 6.918803  | -4.057724 | 1.645618  |
| 110 | 6 | 0 | 6.751202  | 4.416543  | -0.573117 |
| 111 | 6 | 0 | 7.720258  | 4.369652  | 0.623281  |
| 112 | 1 | 0 | 7.236449  | 4.681413  | 1.555989  |
| 113 | 1 | 0 | 8.141109  | 3.368325  | 0.769536  |
| 114 | 1 | 0 | 8.555727  | 5.054534  | 0.445328  |
| 115 | 6 | 0 | 7.535166  | 4.031689  | -1.851142 |
| 116 | 1 | 0 | 6.908435  | 4.085099  | -2.747693 |
| 117 | 1 | 0 | 8.378830  | 4.716177  | -1.994318 |
| 118 | 1 | 0 | 7.933440  | 3.013405  | -1.778833 |
| 119 | 6 | 0 | 6.219922  | 5.863809  | -0.711164 |
| 120 | 1 | 0 | 5.565363  | 5.983041  | -1.581063 |
| 121 | 1 | 0 | 5.656362  | 6.163985  | 0.179320  |
| 122 | 1 | 0 | 7.057745  | 6.559742  | -0.831968 |
| 123 | 6 | 0 | 7.672705  | -4.317507 | 0.319010  |
| 124 | 1 | 0 | 8.543667  | -4.957182 | 0.501320  |
| 125 | 1 | 0 | 7.040700  | -4.821001 | -0.420320 |
| 126 | 1 | 0 | 8.027494  | -3.380142 | -0.123923 |
| 127 | 6 | 0 | 6.445386  | -5.405568 | 2.241653  |
| 128 | 1 | 0 | 5.785110  | -5.949553 | 1.557849  |
| 129 | 1 | 0 | 7.308783  | -6.048217 | 2.447030  |
| 130 | 1 | 0 | 5.904993  | -5.253272 | 3.182633  |
| 131 | 6 | 0 | 7.897772  | -3.404714 | 2.639660  |
| 132 | 1 | 0 | 8.275758  | -2.444747 | 2.269791  |
| 133 | 1 | 0 | 7.438634  | -3.240422 | 3.621187  |
| 134 | 1 | 0 | 8.760375  | -4.062047 | 2.789758  |
| 135 | 6 | 0 | 2.371865  | -4.950416 | -0.584441 |
| 136 | 1 | 0 | 3.233688  | -5.368982 | -1.111182 |
| 137 | 1 | 0 | 2.367600  | -5.339450 | 0.438811  |
| 138 | 1 | 0 | 1.483920  | -5.324335 | -1.102864 |
| 139 | 6 | 0 | 2.444936  | -2.968908 | -2.111178 |
| 140 | 1 | 0 | 1.569027  | -3.343620 | -2.651430 |
| 141 | 1 | 0 | 2.467424  | -1.879709 | -2.213070 |
| 142 | 1 | 0 | 3.345359  | -3.369405 | -2.589541 |

Rotational constants (GHZ): 0.0420272 0.0234389 0.0175146

Standard basis: 6-31G(d) (6D, 7F)

SCF Done: E(UB3LYP) = -2702.16975043 A.U. after 12 cycles

Convg = 0.4903D-08 -V/T = 2.0098

<Sx>= 0.0000 <Sy>= 0.0000 <Sz>= 0.5000 <S\*\*2>= 0.7598 S= 0.5049

<L.S>= 0.000000000000E+00

Annihilation of the first spin contaminant:

S\*\*2 before annihilation 0.7598, after 0.7501

| Item                 | Value    | Threshold | Converged? |
|----------------------|----------|-----------|------------|
| Maximum Force        | 0.000005 | 0.000450  | YES        |
| RMS Force            | 0.000001 | 0.000300  | YES        |
| Maximum Displacement | 0.001613 | 0.001800  | YES        |
| RMS Displacement     | 0.000290 | 0.001200  | YES        |

**C<sub>1</sub>-symmetric transition state for radical cation of conjoined [5]helicene, from chiral D<sub>2</sub> structure to meso C<sub>2h</sub> structure at UB3LYP/6-31G(d) in dichloromethane (DCM).**

Stoichiometry C64H74N4(1+,2)  
 Framework group C1[X(C64H74N4)]  
 Deg. of freedom 420  
 Full point group C1 NOp 1  
 Largest Abelian subgroup C1 NOp 1  
 Largest concise Abelian subgroup C1 NOp 1  
 Standard orientation:

| Center Number | Atomic Number | Atomic Type | Coordinates (Angstroms) |           |           |
|---------------|---------------|-------------|-------------------------|-----------|-----------|
|               |               |             | X                       | Y         | Z         |
| 1             | 7             | 0           | 2.334006                | -0.703765 | 0.275762  |
| 2             | 7             | 0           | -2.524576               | -0.732548 | 0.384356  |
| 3             | 6             | 0           | 1.131354                | -2.809721 | 0.047339  |
| 4             | 6             | 0           | -0.075972               | -3.477136 | 0.278133  |
| 5             | 1             | 0           | -0.089911               | -4.555844 | 0.195106  |
| 6             | 6             | 0           | -1.285877               | -2.822734 | 0.572629  |
| 7             | 6             | 0           | -2.604901               | -3.524360 | 0.886652  |
| 8             | 6             | 0           | -3.664473               | -2.854806 | -0.002985 |
| 9             | 6             | 0           | -4.707862               | -3.564755 | -0.599426 |
| 10            | 1             | 0           | -4.742016               | -4.638286 | -0.456430 |
| 11            | 6             | 0           | -5.719508               | -2.957011 | -1.361785 |
| 12            | 6             | 0           | -5.643207               | -1.569745 | -1.516888 |
| 13            | 1             | 0           | -6.391859               | -1.035189 | -2.090114 |
| 14            | 6             | 0           | -4.606456               | -0.827007 | -0.951693 |
| 15            | 1             | 0           | -4.583427               | 0.243197  | -1.100369 |
| 16            | 6             | 0           | -3.609572               | -1.459185 | -0.207641 |
| 17            | 6             | 0           | -1.302325               | -1.421664 | 0.483495  |
| 18            | 6             | 0           | -0.094517               | -0.729902 | 0.331120  |
| 19            | 6             | 0           | 1.122515                | -1.423046 | 0.240476  |
| 20            | 6             | 0           | -2.524246               | -5.044617 | 0.676145  |
| 21            | 1             | 0           | -2.319917               | -5.308661 | -0.366863 |
| 22            | 1             | 0           | -3.460886               | -5.523823 | 0.973923  |
| 23            | 1             | 0           | -1.738169               | -5.474468 | 1.304805  |
| 24            | 6             | 0           | -2.958126               | -3.265230 | 2.380486  |
| 25            | 1             | 0           | -3.008101               | -2.196310 | 2.606974  |
| 26            | 1             | 0           | -2.201801               | -3.717336 | 3.031954  |
| 27            | 1             | 0           | -3.930856               | -3.710815 | 2.614972  |
| 28            | 6             | 0           | -0.100657               | 0.611560  | -0.142698 |
| 29            | 6             | 0           | -1.319368               | 1.259965  | -0.358847 |
| 30            | 7             | 0           | -2.490178               | 0.663267  | 0.129502  |
| 31            | 7             | 0           | 2.322038                | 0.632445  | -0.183299 |
| 32            | 6             | 0           | 1.092286                | 1.174085  | -0.597733 |
| 33            | 6             | 0           | -1.350064               | 2.526888  | -0.935754 |
| 34            | 6             | 0           | 1.059756                | 2.295102  | -1.448315 |
| 35            | 6             | 0           | -0.152282               | 2.981516  | -1.533233 |
| 36            | 1             | 0           | -0.185879               | 3.893354  | -2.116408 |
| 37            | 6             | 0           | -2.692433               | 3.266633  | -0.965937 |
| 38            | 6             | 0           | -3.481927               | 2.853737  | 0.301208  |
| 39            | 6             | 0           | -3.396705               | 1.529012  | 0.789886  |
| 40            | 6             | 0           | -4.342714               | 3.726043  | 0.969435  |
| 41            | 1             | 0           | -4.411453               | 4.748376  | 0.617141  |
| 42            | 6             | 0           | -5.138683               | 3.343843  | 2.064638  |
| 43            | 6             | 0           | -5.038887               | 2.015499  | 2.491598  |
| 44            | 6             | 0           | -4.176590               | 1.113767  | 1.867459  |
| 45            | 1             | 0           | -4.101642               | 0.093461  | 2.226338  |
| 46            | 1             | 0           | -5.626744               | 1.659212  | 3.329769  |
| 47            | 6             | 0           | -3.481046               | 2.820363  | -2.230357 |
| 48            | 1             | 0           | -3.599778               | 1.734317  | -2.272082 |
| 49            | 1             | 0           | -4.476465               | 3.277625  | -2.235179 |
| 50            | 1             | 0           | -2.950343               | 3.134736  | -3.136285 |
| 51            | 6             | 0           | -2.484247               | 4.791211  | -1.040101 |
| 52            | 1             | 0           | -1.951481               | 5.171575  | -0.162477 |
| 53            | 1             | 0           | -1.915402               | 5.061212  | -1.934185 |
| 54            | 1             | 0           | -3.442748               | 5.311830  | -1.117295 |
| 55            | 6             | 0           | -6.067001               | 4.374620  | 2.733141  |
| 56            | 6             | 0           | -6.844888               | -3.812831 | -1.970878 |
| 57            | 6             | 0           | -6.874725               | 3.762472  | 3.893424  |
| 58            | 1             | 0           | -7.517340               | 2.941788  | 3.554568  |
| 59            | 1             | 0           | -6.223981               | 3.381786  | 4.688895  |
| 60            | 1             | 0           | -7.521760               | 4.528707  | 4.334714  |
| 61            | 6             | 0           | -5.219784               | 5.540169  | 3.297368  |
| 62            | 1             | 0           | -4.510994               | 5.179479  | 4.051857  |
| 63            | 1             | 0           | -4.646320               | 6.044992  | 2.512580  |
| 64            | 1             | 0           | -5.867956               | 6.288084  | 3.770152  |
| 65            | 6             | 0           | -7.068236               | 4.928700  | 1.691277  |
| 66            | 1             | 0           | -6.559534               | 5.421440  | 0.855881  |
| 67            | 1             | 0           | -7.690192               | 4.125353  | 1.279820  |
| 68            | 1             | 0           | -7.731253               | 5.666557  | 2.158719  |
| 69            | 6             | 0           | -6.234100               | -4.870039 | -2.921632 |
| 70            | 1             | 0           | -5.539278               | -5.536227 | -2.399404 |
| 71            | 1             | 0           | -7.026210               | -5.490568 | -3.357634 |
| 72            | 1             | 0           | -5.687732               | -4.390877 | -3.742371 |
| 73            | 6             | 0           | -7.847585               | -2.964883 | -2.776042 |
| 74            | 1             | 0           | -8.343460               | -2.215420 | -2.148913 |
| 75            | 1             | 0           | -7.364503               | -2.446569 | -3.612214 |
| 76            | 1             | 0           | -8.625175               | -3.614077 | -3.193540 |
| 77            | 6             | 0           | -7.618562               | -4.530508 | -0.838925 |
| 78            | 1             | 0           | -6.967001               | -5.187227 | -0.252673 |

|     |   |   |           |           |           |
|-----|---|---|-----------|-----------|-----------|
| 79  | 1 | 0 | -8.070673 | -3.805153 | -0.152693 |
| 80  | 1 | 0 | -8.422287 | -5.146800 | -1.259644 |
| 81  | 6 | 0 | 2.307264  | 2.545879  | -2.299558 |
| 82  | 6 | 0 | 2.366697  | -3.418851 | -0.586792 |
| 83  | 6 | 0 | 3.437242  | 1.551692  | -0.234841 |
| 84  | 6 | 0 | 3.492148  | -1.488965 | 0.657957  |
| 85  | 6 | 0 | 4.311613  | 1.768818  | 0.831607  |
| 86  | 6 | 0 | 4.375764  | -1.113029 | 1.672560  |
| 87  | 6 | 0 | 3.491483  | 2.448315  | -1.332336 |
| 88  | 6 | 0 | 3.574255  | -2.815406 | 0.166659  |
| 89  | 6 | 0 | 4.693269  | -3.575211 | 0.506548  |
| 90  | 6 | 0 | 4.580760  | 3.314903  | -1.417536 |
| 91  | 6 | 0 | 5.475455  | -1.900382 | 2.004208  |
| 92  | 6 | 0 | 5.376921  | 2.658794  | 0.726183  |
| 93  | 6 | 0 | 5.576836  | 3.412943  | -0.432194 |
| 94  | 6 | 0 | 5.698430  | -3.129965 | 1.380132  |
| 95  | 1 | 0 | 4.769548  | -4.574529 | 0.096929  |
| 96  | 1 | 0 | 6.137440  | -1.540762 | 2.782923  |
| 97  | 1 | 0 | 4.180726  | -0.247857 | 2.278226  |
| 98  | 1 | 0 | 4.129219  | 1.315788  | 1.786641  |
| 99  | 1 | 0 | 6.030765  | 2.767443  | 1.583010  |
| 100 | 1 | 0 | 4.639940  | 3.969125  | -2.278186 |
| 101 | 6 | 0 | 2.404452  | 1.430762  | -3.381410 |
| 102 | 1 | 0 | 2.455885  | 0.431559  | -2.938900 |
| 103 | 1 | 0 | 1.532330  | 1.467367  | -4.042728 |
| 104 | 1 | 0 | 3.306066  | 1.579901  | -3.984980 |
| 105 | 6 | 0 | 2.240558  | 3.902254  | -3.021056 |
| 106 | 1 | 0 | 1.350022  | 3.942841  | -3.655204 |
| 107 | 1 | 0 | 2.206047  | 4.740733  | -2.318205 |
| 108 | 1 | 0 | 3.099985  | 4.038134  | -3.682819 |
| 109 | 6 | 0 | 6.921537  | -4.014223 | 1.667386  |
| 110 | 6 | 0 | 6.766584  | 4.366458  | -0.623352 |
| 111 | 6 | 0 | 7.734093  | 4.332064  | 0.574676  |
| 112 | 1 | 0 | 7.251992  | 4.667480  | 1.499905  |
| 113 | 1 | 0 | 8.140164  | 3.328044  | 0.741933  |
| 114 | 1 | 0 | 8.577853  | 5.003292  | 0.382110  |
| 115 | 6 | 0 | 7.547357  | 3.948410  | -1.892645 |
| 116 | 1 | 0 | 6.919900  | 3.989180  | -2.789149 |
| 117 | 1 | 0 | 8.397519  | 4.622600  | -2.048255 |
| 118 | 1 | 0 | 7.935466  | 2.927890  | -1.797352 |
| 119 | 6 | 0 | 6.252359  | 5.816660  | -0.790957 |
| 120 | 1 | 0 | 5.598484  | 5.924184  | -1.662694 |
| 121 | 1 | 0 | 5.692712  | 6.139584  | 0.094233  |
| 122 | 1 | 0 | 7.099310  | 6.499542  | -0.925256 |
| 123 | 6 | 0 | 7.662235  | -4.298259 | 0.338548  |
| 124 | 1 | 0 | 8.536675  | -4.932427 | 0.525482  |
| 125 | 1 | 0 | 7.023061  | -4.816447 | -0.384014 |
| 126 | 1 | 0 | 8.009792  | -3.367508 | -0.124089 |
| 127 | 6 | 0 | 6.460184  | -5.351499 | 2.295458  |
| 128 | 1 | 0 | 5.789222  | -5.906913 | 1.631824  |
| 129 | 1 | 0 | 7.328678  | -5.988462 | 2.499159  |
| 130 | 1 | 0 | 5.934674  | -5.180323 | 3.241809  |
| 131 | 6 | 0 | 7.909589  | -3.337824 | 2.636429  |
| 132 | 1 | 0 | 8.275460  | -2.382520 | 2.243201  |
| 133 | 1 | 0 | 7.460594  | -3.156353 | 3.619443  |
| 134 | 1 | 0 | 8.777162  | -3.989158 | 2.786897  |
| 135 | 6 | 0 | 2.366884  | -4.955761 | -0.529227 |
| 136 | 1 | 0 | 3.233423  | -5.378020 | -1.044701 |
| 137 | 1 | 0 | 2.357162  | -5.328667 | 0.499903  |
| 138 | 1 | 0 | 1.482161  | -5.337995 | -1.046747 |
| 139 | 6 | 0 | 2.435071  | -2.995176 | -2.084811 |
| 140 | 1 | 0 | 1.555923  | -3.375110 | -2.615738 |
| 141 | 1 | 0 | 2.462969  | -1.907932 | -2.203709 |
| 142 | 1 | 0 | 3.332616  | -3.409337 | -2.556612 |

Rotational constants (GHZ): 0.0420570 0.0234398 0.0175615

Standard basis: 6-31G(d) (6D, 7F)

Error on total polarization charges = 0.01741

SCF Done: E(UB3LYP) = -2702.21029074 A.U. after 10 cycles

Conv = 0.8060D-08 -V/T = 2.0099

<Sx>= 0.0000 <Sy>= 0.0000 <Sz>= 0.5000 <S\*\*2>= 0.7586 S= 0.5043

<L.S>= 0.000000000000E+00

Annihilation of the first spin contaminant:

S\*\*2 before annihilation 0.7586, after 0.7501

| Item                 | Value    | Threshold | Converged? |
|----------------------|----------|-----------|------------|
| Maximum Force        | 0.000011 | 0.000450  | YES        |
| RMS Force            | 0.000001 | 0.000300  | YES        |
| Maximum Displacement | 0.001045 | 0.001800  | YES        |
| RMS Displacement     | 0.000183 | 0.001200  | YES        |

Predicted change in Energy=-1.982579D-08

Optimization completed.

-- Stationary point found.



# Diradical dication of conjoined [5]helicene, chiral, $D_2$ triplet state at UB3LYP/6-31G(d) in the gas phase

Stoichiometry C64H74N4(2+,3)  
 Framework group D2[C2(HCC.CCH).X(C60H72N4)]  
 Deg. of freedom 105  
 Full point group D2 NOp 4  
 Largest Abelian subgroup D2 NOp 4  
 Largest concise Abelian subgroup D2 NOp 4  
 Standard orientation:

| Center Number | Atomic Number | Atomic Type | Coordinates (Angstroms) |           |           |
|---------------|---------------|-------------|-------------------------|-----------|-----------|
|               |               |             | X                       | Y         | Z         |
| 1             | 7             | 0           | 2.403168                | 0.161752  | 0.671197  |
| 2             | 7             | 0           | -2.403168               | -0.161752 | 0.671197  |
| 3             | 6             | 0           | 5.572915                | 2.315796  | 2.485587  |
| 4             | 6             | 0           | 4.627163                | 1.596036  | 3.239826  |
| 5             | 1             | 0           | 4.713997                | 1.618742  | 4.318204  |
| 6             | 6             | 0           | 3.588310                | 0.859445  | 2.673222  |
| 7             | 6             | 0           | 2.594850                | 0.042027  | 3.517745  |
| 8             | 6             | 0           | 1.238960                | 0.064112  | 2.808297  |
| 9             | 6             | 0           | 0.000000                | 0.000000  | 3.464442  |
| 10            | 1             | 0           | 0.000000                | 0.000000  | 4.545282  |
| 11            | 6             | 0           | -1.238960               | -0.064112 | 2.808297  |
| 12            | 6             | 0           | -2.594850               | -0.042027 | 3.517745  |
| 13            | 6             | 0           | -3.588310               | -0.859445 | 2.673222  |
| 14            | 6             | 0           | -4.627163               | -1.596036 | 3.239826  |
| 15            | 1             | 0           | -4.713997               | -1.618742 | 4.318204  |
| 16            | 6             | 0           | -5.572915               | -2.315796 | 2.485587  |
| 17            | 6             | 0           | -5.433444               | -2.285875 | 1.088983  |
| 18            | 1             | 0           | -6.119098               | -2.837403 | 0.457647  |
| 19            | 6             | 0           | -4.411819               | -1.569892 | 0.479754  |
| 20            | 1             | 0           | -4.321297               | -1.582165 | -0.599238 |
| 21            | 6             | 0           | -3.499420               | -0.855731 | 1.262786  |
| 22            | 6             | 0           | -1.210919               | -0.057569 | 1.406448  |
| 23            | 6             | 0           | 0.000000                | 0.000000  | 0.711127  |
| 24            | 6             | 0           | 1.210919                | 0.057569  | 1.406448  |
| 25            | 6             | 0           | 3.499420                | 0.855731  | 1.262786  |
| 26            | 6             | 0           | 4.411819                | 1.569892  | 0.479754  |
| 27            | 6             | 0           | 5.433444                | 2.285875  | 1.088983  |
| 28            | 1             | 0           | 6.119098                | 2.837403  | 0.457647  |
| 29            | 6             | 0           | 3.080821                | -1.440209 | 3.573786  |
| 30            | 1             | 0           | 3.139249                | -1.891219 | 2.578173  |
| 31            | 1             | 0           | 2.393044                | -2.042877 | 4.176084  |
| 32            | 1             | 0           | 4.073898                | -1.487747 | 4.031237  |
| 33            | 6             | 0           | 2.492353                | 0.566571  | 4.962882  |
| 34            | 1             | 0           | 2.164122                | 1.610089  | 4.999496  |
| 35            | 1             | 0           | 3.455890                | 0.488391  | 5.471382  |
| 36            | 1             | 0           | 1.797142                | -0.041471 | 5.547944  |
| 37            | 6             | 0           | -2.492353               | -0.566571 | 4.962882  |
| 38            | 1             | 0           | -2.164122               | -1.610089 | 4.999496  |
| 39            | 1             | 0           | -3.455890               | -0.488391 | 5.471382  |
| 40            | 1             | 0           | -1.797142               | 0.041471  | 5.547944  |
| 41            | 6             | 0           | -3.080821               | 1.440209  | 3.573786  |
| 42            | 1             | 0           | -3.139249               | 1.891219  | 2.578173  |
| 43            | 1             | 0           | -2.393044               | 2.042877  | 4.176084  |
| 44            | 1             | 0           | -4.073898               | 1.487747  | 4.031237  |
| 45            | 1             | 0           | 4.321297                | 1.582165  | -0.599238 |
| 46            | 6             | 0           | 0.000000                | 0.000000  | -0.711127 |
| 47            | 6             | 0           | -1.210919               | 0.057569  | -1.406448 |
| 48            | 7             | 0           | -2.403168               | 0.161752  | -0.671197 |
| 49            | 7             | 0           | 2.403168                | -0.161752 | -0.671197 |
| 50            | 6             | 0           | 1.210919                | -0.057569 | -1.406448 |
| 51            | 6             | 0           | -1.238960               | 0.064112  | -2.808297 |
| 52            | 6             | 0           | 1.238960                | -0.064112 | -2.808297 |
| 53            | 6             | 0           | 0.000000                | 0.000000  | -3.464442 |
| 54            | 1             | 0           | 0.000000                | 0.000000  | -4.545282 |
| 55            | 6             | 0           | 2.594850                | -0.042027 | -3.517745 |
| 56            | 6             | 0           | -2.594850               | 0.042027  | -3.517745 |
| 57            | 6             | 0           | 3.588310                | -0.859445 | -2.673222 |
| 58            | 6             | 0           | -3.588310               | 0.859445  | -2.673222 |
| 59            | 6             | 0           | -3.499420               | 0.855731  | -1.262786 |
| 60            | 6             | 0           | 3.499420                | -0.855731 | -1.262786 |
| 61            | 6             | 0           | -4.627163               | 1.596036  | -3.239826 |
| 62            | 1             | 0           | -4.713997               | 1.618742  | -4.318204 |
| 63            | 6             | 0           | 4.627163                | -1.596036 | -3.239826 |
| 64            | 1             | 0           | 4.713997                | -1.618742 | -4.318204 |
| 65            | 6             | 0           | 5.572915                | -2.315796 | -2.485587 |
| 66            | 6             | 0           | 5.433444                | -2.285875 | -1.088983 |
| 67            | 1             | 0           | 6.119098                | -2.837403 | -0.457647 |
| 68            | 6             | 0           | 4.411819                | -1.569892 | -0.479754 |
| 69            | 1             | 0           | 4.321297                | -1.582165 | 0.599238  |
| 70            | 6             | 0           | -5.572915               | 2.315796  | -2.485587 |
| 71            | 6             | 0           | -5.433444               | 2.285875  | -1.088983 |
| 72            | 6             | 0           | -4.411819               | 1.569892  | -0.479754 |
| 73            | 1             | 0           | -4.321297               | 1.582165  | 0.599238  |
| 74            | 1             | 0           | -6.119098               | 2.837403  | -0.457647 |
| 75            | 6             | 0           | -3.080821               | -1.440209 | -3.573786 |
| 76            | 1             | 0           | -3.139249               | -1.891219 | -2.578173 |
| 77            | 1             | 0           | -4.073898               | -1.487747 | -4.031237 |
| 78            | 1             | 0           | -2.393044               | -2.042877 | -4.176084 |

|     |   |   |           |           |           |
|-----|---|---|-----------|-----------|-----------|
| 79  | 6 | 0 | -2.492353 | 0.566571  | -4.962882 |
| 80  | 1 | 0 | -2.164122 | 1.610089  | -4.999496 |
| 81  | 1 | 0 | -1.797142 | -0.041471 | -5.547944 |
| 82  | 1 | 0 | -3.455890 | 0.488391  | -5.471382 |
| 83  | 6 | 0 | 2.492353  | -0.566571 | -4.962882 |
| 84  | 1 | 0 | 2.164122  | -1.610089 | -4.999496 |
| 85  | 1 | 0 | 1.797142  | 0.041471  | -5.547944 |
| 86  | 1 | 0 | 3.455890  | -0.488391 | -5.471382 |
| 87  | 6 | 0 | 3.080821  | 1.440209  | -3.573786 |
| 88  | 1 | 0 | 2.393044  | 2.042877  | -4.176084 |
| 89  | 1 | 0 | 3.139249  | 1.891219  | -2.578173 |
| 90  | 1 | 0 | 4.073898  | 1.487747  | -4.031237 |
| 91  | 6 | 0 | 6.688820  | -3.095084 | -3.197238 |
| 92  | 6 | 0 | -6.688820 | 3.095084  | -3.197238 |
| 93  | 6 | 0 | -6.688820 | -3.095084 | 3.197238  |
| 94  | 6 | 0 | 6.688820  | 3.095084  | 3.197238  |
| 95  | 6 | 0 | 6.054732  | -4.154845 | -4.132469 |
| 96  | 1 | 0 | 5.419978  | -3.702456 | -4.901848 |
| 97  | 1 | 0 | 6.843796  | -4.714870 | -4.645398 |
| 98  | 1 | 0 | 5.446373  | -4.869587 | -3.567300 |
| 99  | 6 | 0 | 7.541254  | -2.110220 | -4.036055 |
| 100 | 1 | 0 | 8.339465  | -2.656430 | -4.549710 |
| 101 | 1 | 0 | 6.949132  | -1.597242 | -4.801460 |
| 102 | 1 | 0 | 8.008027  | -1.349018 | -3.401117 |
| 103 | 6 | 0 | 7.618342  | -3.817890 | -2.203908 |
| 104 | 1 | 0 | 8.123287  | -3.118053 | -1.528285 |
| 105 | 1 | 0 | 7.080713  | -4.558434 | -1.600820 |
| 106 | 1 | 0 | 8.396007  | -4.353202 | -2.757141 |
| 107 | 6 | 0 | -7.618342 | 3.817890  | -2.203908 |
| 108 | 1 | 0 | -8.123287 | 3.118053  | -1.528285 |
| 109 | 1 | 0 | -7.080713 | 4.558434  | -1.600820 |
| 110 | 1 | 0 | -8.396007 | 4.353202  | -2.757141 |
| 111 | 6 | 0 | -6.054732 | 4.154845  | -4.132469 |
| 112 | 1 | 0 | -5.446373 | 4.869587  | -3.567300 |
| 113 | 1 | 0 | -5.419978 | 3.702456  | -4.901848 |
| 114 | 1 | 0 | -6.843796 | 4.714870  | -4.645398 |
| 115 | 6 | 0 | -7.541254 | 2.110220  | -4.036055 |
| 116 | 1 | 0 | -6.949132 | 1.597242  | -4.801460 |
| 117 | 1 | 0 | -8.008027 | 1.349018  | -3.401117 |
| 118 | 1 | 0 | -8.339465 | 2.656430  | -4.549710 |
| 119 | 6 | 0 | -6.054732 | -4.154845 | 4.132469  |
| 120 | 1 | 0 | -5.419978 | -3.702456 | 4.901848  |
| 121 | 1 | 0 | -6.843796 | -4.714870 | 4.645398  |
| 122 | 1 | 0 | -5.446373 | -4.869587 | 3.567300  |
| 123 | 6 | 0 | -7.618342 | -3.817890 | 2.203908  |
| 124 | 1 | 0 | -8.123287 | -3.118053 | 1.528285  |
| 125 | 1 | 0 | -7.080713 | -4.558434 | 1.600820  |
| 126 | 1 | 0 | -8.396007 | -4.353202 | 2.757141  |
| 127 | 6 | 0 | -7.541254 | -2.110220 | 4.036055  |
| 128 | 1 | 0 | -6.949132 | -1.597242 | 4.801460  |
| 129 | 1 | 0 | -8.008027 | -1.349018 | 3.401117  |
| 130 | 1 | 0 | -8.339465 | -2.656430 | 4.549710  |
| 131 | 6 | 0 | 7.541254  | 2.110220  | 4.036055  |
| 132 | 1 | 0 | 8.339465  | 2.656430  | 4.549710  |
| 133 | 1 | 0 | 6.949132  | 1.597242  | 4.801460  |
| 134 | 1 | 0 | 8.008027  | 1.349018  | 3.401117  |
| 135 | 6 | 0 | 7.618342  | 3.817890  | 2.203908  |
| 136 | 1 | 0 | 8.123287  | 3.118053  | 1.528285  |
| 137 | 1 | 0 | 7.080713  | 4.558434  | 1.600820  |
| 138 | 1 | 0 | 8.396007  | 4.353202  | 2.757141  |
| 139 | 6 | 0 | 6.054732  | 4.154845  | 4.132469  |
| 140 | 1 | 0 | 5.446373  | 4.869587  | 3.567300  |
| 141 | 1 | 0 | 5.419978  | 3.702456  | 4.901848  |
| 142 | 1 | 0 | 6.843796  | 4.714870  | 4.645398  |

Rotational constants (GHZ): 0.0433204 0.0217742 0.0184319  
Standard basis: 6-31G(d) (6D, 7F)  
SCF Done: E(UB3LYP) = -2701.93771786 A.U. after 1 cycles  
Conv = 0.6988D-08 -V/T = 2.0098  
<Sx>= 0.0000 <Sy>= 0.0000 <Sz>= 1.0000 <S\*\*2>= 2.0205 S= 1.0068  
<L.S>= 0.000000000000E+00  
Annihilation of the first spin contaminant:  
S\*\*2 before annihilation 2.0205, after 2.0003  
Item Value Threshold Converged?  
Maximum Force 0.000000 0.000015 YES  
RMS Force 0.000000 0.000010 YES  
Maximum Displacement 0.000059 0.000060 YES  
RMS Displacement 0.000013 0.000040 YES  
Predicted change in Energy=-8.650167D-12  
Optimization completed.  
-- Stationary point found.

# Diradical dication of conjoined [5]helicene, chiral, $D_2$ broken symmetry singlet state at UB3LYP/6-31G(d) in the gas phase

Stoichiometry C64H74N4(2+)  
 Framework group D2[C2(HCC.CCH),X(C60H72N4)]  
 Deg. of freedom 105  
 Full point group D2 NOp 4  
 Largest Abelian subgroup D2 NOp 4  
 Largest concise Abelian subgroup D2 NOp 4  
 Standard orientation:

| Center Number | Atomic Number | Atomic Type | Coordinates (Angstroms) |           |           |
|---------------|---------------|-------------|-------------------------|-----------|-----------|
|               |               |             | X                       | Y         | Z         |
| 1             | 7             | 0           | 2.404170                | 0.159613  | 0.671763  |
| 2             | 7             | 0           | -2.404170               | -0.159613 | 0.671763  |
| 3             | 6             | 0           | 5.564863                | 2.317419  | 2.494291  |
| 4             | 6             | 0           | 4.621852                | 1.591319  | 3.245932  |
| 5             | 1             | 0           | 4.709186                | 1.609872  | 4.324305  |
| 6             | 6             | 0           | 3.586939                | 0.851360  | 2.676507  |
| 7             | 6             | 0           | 2.597024                | 0.024336  | 3.516280  |
| 8             | 6             | 0           | 1.239912                | 0.054560  | 2.807235  |
| 9             | 6             | 0           | 0.000000                | 0.000000  | 3.462935  |
| 10            | 1             | 0           | 0.000000                | 0.000000  | 4.543845  |
| 11            | 6             | 0           | -1.239912               | -0.054560 | 2.807235  |
| 12            | 6             | 0           | -2.597024               | -0.024336 | 3.516280  |
| 13            | 6             | 0           | -3.586939               | -0.851360 | 2.676507  |
| 14            | 6             | 0           | -4.621852               | -1.591319 | 3.245932  |
| 15            | 1             | 0           | -4.709186               | -1.609872 | 4.324305  |
| 16            | 6             | 0           | -5.564863               | -2.317419 | 2.494291  |
| 17            | 6             | 0           | -5.426454               | -2.291166 | 1.097079  |
| 18            | 1             | 0           | -6.109918               | -2.848061 | 0.468111  |
| 19            | 6             | 0           | -4.408645               | -1.572718 | 0.485130  |
| 20            | 1             | 0           | -4.317655               | -1.588325 | -0.593790 |
| 21            | 6             | 0           | -3.498284               | -0.852864 | 1.265756  |
| 22            | 6             | 0           | -1.212596               | -0.049470 | 1.407595  |
| 23            | 6             | 0           | 0.000000                | 0.000000  | 0.709003  |
| 24            | 6             | 0           | 1.212596                | 0.049470  | 1.407595  |
| 25            | 6             | 0           | 3.498284                | 0.852864  | 1.265756  |
| 26            | 6             | 0           | 4.408645                | 1.572718  | 0.485130  |
| 27            | 6             | 0           | 5.426454                | 2.291166  | 1.097079  |
| 28            | 1             | 0           | 6.109918                | 2.848061  | 0.468111  |
| 29            | 6             | 0           | 3.084042                | -1.457062 | 3.558728  |
| 30            | 1             | 0           | 3.137116                | -1.900901 | 2.559645  |
| 31            | 1             | 0           | 2.399252                | -2.064347 | 4.159892  |
| 32            | 1             | 0           | 4.079517                | -1.508879 | 4.010621  |
| 33            | 6             | 0           | 2.496491                | 0.536874  | 4.965392  |
| 34            | 1             | 0           | 2.169544                | 1.580452  | 5.011226  |
| 35            | 1             | 0           | 3.460406                | 0.453004  | 5.472495  |
| 36            | 1             | 0           | 1.800933                | -0.075080 | 5.546036  |
| 37            | 6             | 0           | -2.496491               | -0.536874 | 4.965392  |
| 38            | 1             | 0           | -2.169544               | -1.580452 | 5.011226  |
| 39            | 1             | 0           | -3.460406               | -0.453004 | 5.472495  |
| 40            | 1             | 0           | -1.800933               | 0.075080  | 5.546036  |
| 41            | 6             | 0           | -3.084042               | 1.457062  | 3.558728  |
| 42            | 1             | 0           | -3.137116               | 1.900901  | 2.559645  |
| 43            | 1             | 0           | -2.399252               | 2.064347  | 4.159892  |
| 44            | 1             | 0           | -4.079517               | 1.508879  | 4.010621  |
| 45            | 1             | 0           | 4.317655                | 1.588325  | -0.593790 |
| 46            | 6             | 0           | 0.000000                | 0.000000  | -0.709003 |
| 47            | 6             | 0           | -1.212596               | 0.049470  | -1.407595 |
| 48            | 7             | 0           | -2.404170               | 0.159613  | -0.671763 |
| 49            | 7             | 0           | 2.404170                | -0.159613 | -0.671763 |
| 50            | 6             | 0           | 1.212596                | -0.049470 | -1.407595 |
| 51            | 6             | 0           | -1.239912               | 0.054560  | -2.807235 |
| 52            | 6             | 0           | 1.239912                | -0.054560 | -2.807235 |
| 53            | 6             | 0           | 0.000000                | 0.000000  | -3.462935 |
| 54            | 1             | 0           | 0.000000                | 0.000000  | -4.543845 |
| 55            | 6             | 0           | 2.597024                | -0.024336 | -3.516280 |
| 56            | 6             | 0           | -2.597024               | 0.024336  | -3.516280 |
| 57            | 6             | 0           | 3.586939                | -0.851360 | -2.676507 |
| 58            | 6             | 0           | -3.586939               | 0.851360  | -2.676507 |
| 59            | 6             | 0           | -3.498284               | 0.852864  | -1.265756 |
| 60            | 6             | 0           | 3.498284                | -0.852864 | -1.265756 |
| 61            | 6             | 0           | -4.621852               | 1.591319  | -3.245932 |
| 62            | 1             | 0           | -4.709186               | 1.609872  | -4.324305 |
| 63            | 6             | 0           | 4.621852                | -1.591319 | -3.245932 |
| 64            | 1             | 0           | 4.709186                | -1.609872 | -4.324305 |
| 65            | 6             | 0           | 5.564863                | -2.317419 | -2.494291 |
| 66            | 6             | 0           | 5.426454                | -2.291166 | -1.097079 |
| 67            | 1             | 0           | 6.109918                | -2.848061 | -0.468111 |
| 68            | 6             | 0           | 4.408645                | -1.572718 | -0.485130 |
| 69            | 1             | 0           | 4.317655                | -1.588325 | 0.593790  |
| 70            | 6             | 0           | -5.564863               | 2.317419  | -2.494291 |
| 71            | 6             | 0           | -5.426454               | 2.291166  | -1.097079 |
| 72            | 6             | 0           | -4.408645               | 1.572718  | -0.485130 |
| 73            | 1             | 0           | -4.317655               | 1.588325  | 0.593790  |
| 74            | 1             | 0           | -6.109918               | 2.848061  | -0.468111 |
| 75            | 6             | 0           | -3.084042               | -1.457062 | -3.558728 |
| 76            | 1             | 0           | -3.137116               | -1.900901 | -2.559645 |
| 77            | 1             | 0           | -4.079517               | -1.508879 | -4.010621 |

|     |   |   |           |           |           |
|-----|---|---|-----------|-----------|-----------|
| 78  | 1 | 0 | -2.399252 | -2.064347 | -4.159892 |
| 79  | 6 | 0 | -2.496491 | 0.536874  | -4.965392 |
| 80  | 1 | 0 | -2.169544 | 1.580452  | -5.011226 |
| 81  | 1 | 0 | -1.800933 | -0.075080 | -5.546036 |
| 82  | 1 | 0 | -3.460406 | 0.453004  | -5.472495 |
| 83  | 6 | 0 | 2.496491  | -0.536874 | -4.965392 |
| 84  | 1 | 0 | 2.169544  | -1.580452 | -5.011226 |
| 85  | 1 | 0 | 1.800933  | 0.075080  | -5.546036 |
| 86  | 1 | 0 | 3.460406  | -0.453004 | -5.472495 |
| 87  | 6 | 0 | 3.084042  | 1.457062  | -3.558728 |
| 88  | 1 | 0 | 2.399252  | 2.064347  | -4.159892 |
| 89  | 1 | 0 | 3.137116  | 1.900901  | -2.559645 |
| 90  | 1 | 0 | 4.079517  | 1.508879  | -4.010621 |
| 91  | 6 | 0 | 6.680393  | -3.094664 | -3.208017 |
| 92  | 6 | 0 | -6.680393 | 3.094664  | -3.208017 |
| 93  | 6 | 0 | -6.680393 | -3.094664 | 3.208017  |
| 94  | 6 | 0 | 6.680393  | 3.094664  | 3.208017  |
| 95  | 6 | 0 | 6.049434  | -4.133659 | -4.168064 |
| 96  | 1 | 0 | 5.428116  | -3.664443 | -4.938448 |
| 97  | 1 | 0 | 6.841003  | -4.690809 | -4.680241 |
| 98  | 1 | 0 | 5.428694  | -4.852984 | -3.622574 |
| 99  | 6 | 0 | 7.548521  | -2.101281 | -4.020705 |
| 100 | 1 | 0 | 8.348938  | -2.643683 | -4.534940 |
| 101 | 1 | 0 | 6.967693  | -1.571354 | -4.783251 |
| 102 | 1 | 0 | 8.012897  | -1.354203 | -3.367503 |
| 103 | 6 | 0 | 7.594521  | -3.841012 | -2.217435 |
| 104 | 1 | 0 | 8.100021  | -3.156414 | -1.526812 |
| 105 | 1 | 0 | 7.044762  | -4.585402 | -1.629987 |
| 106 | 1 | 0 | 8.372562  | -4.375308 | -2.771095 |
| 107 | 6 | 0 | -7.594521 | 3.841012  | -2.217435 |
| 108 | 1 | 0 | -8.100021 | 3.156414  | -1.526812 |
| 109 | 1 | 0 | -7.044762 | 4.585402  | -1.629987 |
| 110 | 1 | 0 | -8.372562 | 4.375308  | -2.771095 |
| 111 | 6 | 0 | -6.049434 | 4.133659  | -4.168064 |
| 112 | 1 | 0 | -5.428694 | 4.852984  | -3.622574 |
| 113 | 1 | 0 | -5.428116 | 3.664443  | -4.938448 |
| 114 | 1 | 0 | -6.841003 | 4.690809  | -4.680241 |
| 115 | 6 | 0 | -7.548521 | 2.101281  | -4.020705 |
| 116 | 1 | 0 | -6.967693 | 1.571354  | -4.783251 |
| 117 | 1 | 0 | -8.012897 | 1.354203  | -3.367503 |
| 118 | 1 | 0 | -8.348938 | 2.643683  | -4.534940 |
| 119 | 6 | 0 | -6.049434 | -4.133659 | 4.168064  |
| 120 | 1 | 0 | -5.428116 | -3.664443 | 4.938448  |
| 121 | 1 | 0 | -6.841003 | -4.690809 | 4.680241  |
| 122 | 1 | 0 | -5.428694 | -4.852984 | 3.622574  |
| 123 | 6 | 0 | -7.594521 | -3.841012 | 2.217435  |
| 124 | 1 | 0 | -8.100021 | -3.156414 | 1.526812  |
| 125 | 1 | 0 | -7.044762 | -4.585402 | 1.629987  |
| 126 | 1 | 0 | -8.372562 | -4.375308 | 2.771095  |
| 127 | 6 | 0 | -7.548521 | -2.101281 | 4.020705  |
| 128 | 1 | 0 | -6.967693 | -1.571354 | 4.783251  |
| 129 | 1 | 0 | -8.012897 | -1.354203 | 3.367503  |
| 130 | 1 | 0 | -8.348938 | -2.643683 | 4.534940  |
| 131 | 6 | 0 | 7.548521  | 2.101281  | 4.020705  |
| 132 | 1 | 0 | 8.348938  | 2.643683  | 4.534940  |
| 133 | 1 | 0 | 6.967693  | 1.571354  | 4.783251  |
| 134 | 1 | 0 | 8.012897  | 1.354203  | 3.367503  |
| 135 | 6 | 0 | 7.594521  | 3.841012  | 2.217435  |
| 136 | 1 | 0 | 8.100021  | 3.156414  | 1.526812  |
| 137 | 1 | 0 | 7.044762  | 4.585402  | 1.629987  |
| 138 | 1 | 0 | 8.372562  | 4.375308  | 2.771095  |
| 139 | 6 | 0 | 6.049434  | 4.133659  | 4.168064  |
| 140 | 1 | 0 | 5.428694  | 4.852984  | 3.622574  |
| 141 | 1 | 0 | 5.428116  | 3.664443  | 4.938448  |
| 142 | 1 | 0 | 6.841003  | 4.690809  | 4.680241  |

Rotational constants (GHZ): 0.0432582 0.0218071 0.0184429

Standard basis: 6-31G(d) (6D, 7F)

Density matrix has no symmetry -- integrals replicated.

SCF Done: E(UB3LYP) = -2701.93715620 A.U. after 7 cycles

Conv = 0.3439D-08 -V/T = 2.0098

<Sx>= 0.0000 <Sy>= 0.0000 <Sz>= 0.0000 <S\*\*2>= 0.9753 S= 0.6069

<L.S>= 0.000000000000E+00

Annihilation of the first spin contaminant:

S\*\*2 before annihilation 0.9753, after 0.1255

| Item                 | Value    | Threshold | Converged? |
|----------------------|----------|-----------|------------|
| Maximum Force        | 0.000028 | 0.000450  | YES        |
| RMS Force            | 0.000002 | 0.000300  | YES        |
| Maximum Displacement | 0.001076 | 0.001800  | YES        |
| RMS Displacement     | 0.000303 | 0.001200  | YES        |

Predicted change in Energy=-2.361160D-08

Optimization completed.

-- Stationary point found.

# Diradical dication of conjoined [5]helicene, *meso*, $C_{2h}$ triplet state at UB3LYP/6-31G(d) in the gas phase

Stoichiometry C64H74N4(2+,3)  
 Framework group C2H[SGH(C4H2),X(C60H72N4)]  
 Deg. of freedom 107  
 Full point group C2H NOp 4  
 Largest Abelian subgroup C2H NOp 4  
 Largest concise Abelian subgroup C2H NOp 4  
 Standard orientation:

| Center Number | Atomic Number | Atomic Type | Coordinates (Angstroms) |           |           |
|---------------|---------------|-------------|-------------------------|-----------|-----------|
|               |               |             | X                       | Y         | Z         |
| 1             | 7             | 0           | -0.661445               | 0.197658  | 2.405851  |
| 2             | 7             | 0           | -0.661445               | 0.197658  | -2.405851 |
| 3             | 6             | 0           | -3.295656               | -0.836819 | 5.566995  |
| 4             | 6             | 0           | -3.610478               | 0.160467  | 4.624968  |
| 5             | 1             | 0           | -4.567632               | 0.657868  | 4.711464  |
| 6             | 6             | 0           | -2.757846               | 0.538204  | 3.589166  |
| 7             | 6             | 0           | -3.104250               | 1.658565  | 2.594269  |
| 8             | 6             | 0           | -2.503382               | 1.278479  | 1.239559  |
| 9             | 6             | 0           | -3.083873               | 1.585235  | 0.000000  |
| 10            | 1             | 0           | -4.043962               | 2.081562  | 0.000000  |
| 11            | 6             | 0           | -2.503382               | 1.278479  | -1.239559 |
| 12            | 6             | 0           | -3.104250               | 1.658565  | -2.594269 |
| 13            | 6             | 0           | -2.757846               | 0.538204  | -3.589166 |
| 14            | 6             | 0           | -3.610478               | 0.160467  | -4.624968 |
| 15            | 1             | 0           | -4.567632               | 0.657868  | -4.711464 |
| 16            | 6             | 0           | -3.295656               | -0.836819 | -5.566995 |
| 17            | 6             | 0           | -2.057046               | -1.482195 | -5.424242 |
| 18            | 1             | 0           | -1.769210               | -2.272917 | -6.106014 |
| 19            | 6             | 0           | -1.177914               | -1.143164 | -4.404634 |
| 20            | 1             | 0           | -0.238466               | -1.673534 | -4.312843 |
| 21            | 6             | 0           | -1.519125               | -0.135004 | -3.497269 |
| 22            | 6             | 0           | -1.251141               | 0.646371  | -1.212431 |
| 23            | 6             | 0           | -0.619394               | 0.350588  | 0.000000  |
| 24            | 6             | 0           | -1.251141               | 0.646371  | 1.212431  |
| 25            | 6             | 0           | -1.519125               | -0.135004 | 3.497269  |
| 26            | 6             | 0           | -1.177914               | -1.143164 | 4.404634  |
| 27            | 6             | 0           | -2.057046               | -1.482195 | 5.424242  |
| 28            | 1             | 0           | -1.769210               | -2.272917 | 6.106014  |
| 29            | 6             | 0           | -4.621244               | 1.906971  | 2.501077  |
| 30            | 1             | 0           | -5.166735               | 1.013192  | 2.182239  |
| 31            | 1             | 0           | -4.838375               | 2.719407  | 1.802194  |
| 32            | 1             | 0           | -5.019009               | 2.229722  | 3.465863  |
| 33            | 6             | 0           | -2.426193               | 2.983008  | 3.065971  |
| 34            | 1             | 0           | -1.336769               | 2.891682  | 3.118052  |
| 35            | 1             | 0           | -2.795817               | 3.254778  | 4.059587  |
| 36            | 1             | 0           | -2.662649               | 3.798185  | 2.374157  |
| 37            | 6             | 0           | -4.621244               | 1.906971  | -2.501077 |
| 38            | 1             | 0           | -5.166735               | 1.013192  | -2.182239 |
| 39            | 1             | 0           | -5.019009               | 2.229722  | -3.465863 |
| 40            | 1             | 0           | -4.838375               | 2.719407  | -1.802194 |
| 41            | 6             | 0           | -2.426193               | 2.983008  | -3.065971 |
| 42            | 1             | 0           | -1.336769               | 2.891682  | -3.118052 |
| 43            | 1             | 0           | -2.662649               | 3.798185  | -2.374157 |
| 44            | 1             | 0           | -2.795817               | 3.254778  | -4.059587 |
| 45            | 1             | 0           | -0.238466               | -1.673534 | 4.312843  |
| 46            | 6             | 0           | 0.619394                | -0.350588 | 0.000000  |
| 47            | 6             | 0           | 1.251141                | -0.646371 | -1.212431 |
| 48            | 7             | 0           | 0.661445                | -0.197658 | -2.405851 |
| 49            | 7             | 0           | 0.661445                | -0.197658 | 2.405851  |
| 50            | 6             | 0           | 1.251141                | -0.646371 | 1.212431  |
| 51            | 6             | 0           | 2.503382                | -1.278479 | -1.239559 |
| 52            | 6             | 0           | 2.503382                | -1.278479 | 1.239559  |
| 53            | 6             | 0           | 3.083873                | -1.585235 | 0.000000  |
| 54            | 1             | 0           | 4.043962                | -2.081562 | 0.000000  |
| 55            | 6             | 0           | 3.104250                | -1.658565 | -2.594269 |
| 56            | 6             | 0           | 3.104250                | -1.658565 | 2.594269  |
| 57            | 6             | 0           | 2.757846                | -0.538204 | 3.589166  |
| 58            | 6             | 0           | 2.757846                | -0.538204 | -3.589166 |
| 59            | 6             | 0           | 1.519125                | 0.135004  | -3.497269 |
| 60            | 6             | 0           | 3.610478                | -0.160467 | -4.624968 |
| 61            | 1             | 0           | 4.567632                | -0.657868 | -4.711464 |
| 62            | 6             | 0           | 3.295656                | 0.836819  | -5.566995 |
| 63            | 6             | 0           | 2.057046                | 1.482195  | -5.424242 |
| 64            | 1             | 0           | 1.769210                | 2.272917  | -6.106014 |
| 65            | 6             | 0           | 1.177914                | 1.143164  | -4.404634 |
| 66            | 1             | 0           | 0.238466                | 1.673534  | -4.312843 |
| 67            | 6             | 0           | 1.519125                | 0.135004  | 3.497269  |
| 68            | 6             | 0           | 3.610478                | -0.160467 | 4.624968  |
| 69            | 1             | 0           | 4.567632                | -0.657868 | 4.711464  |
| 70            | 6             | 0           | 3.295656                | 0.836819  | 5.566995  |
| 71            | 6             | 0           | 2.057046                | 1.482195  | 5.424242  |
| 72            | 1             | 0           | 1.769210                | 2.272917  | 6.106014  |
| 73            | 6             | 0           | 1.177914                | 1.143164  | 4.404634  |
| 74            | 1             | 0           | 0.238466                | 1.673534  | 4.312843  |
| 75            | 6             | 0           | 2.426193                | -2.983008 | -3.065971 |
| 76            | 1             | 0           | 1.336769                | -2.891682 | -3.118052 |
| 77            | 1             | 0           | 2.795817                | -3.254778 | -4.059587 |
| 78            | 1             | 0           | 2.662649                | -3.798185 | -2.374157 |

|     |   |   |           |           |           |
|-----|---|---|-----------|-----------|-----------|
| 79  | 6 | 0 | 4.621244  | -1.906971 | -2.501077 |
| 80  | 1 | 0 | 5.166735  | -1.013192 | -2.182239 |
| 81  | 1 | 0 | 4.838375  | -2.719407 | -1.802194 |
| 82  | 1 | 0 | 5.019009  | -2.229722 | -3.465863 |
| 83  | 6 | 0 | 4.621244  | -1.906971 | 2.501077  |
| 84  | 1 | 0 | 4.838375  | -2.719407 | 1.802194  |
| 85  | 1 | 0 | 5.166735  | -1.013192 | 2.182239  |
| 86  | 1 | 0 | 5.019009  | -2.229722 | 3.465863  |
| 87  | 6 | 0 | 2.426193  | -2.983008 | 3.065971  |
| 88  | 1 | 0 | 2.795817  | -3.254778 | 4.059587  |
| 89  | 1 | 0 | 1.336769  | -2.891682 | 3.118052  |
| 90  | 1 | 0 | 2.662649  | -3.798185 | 2.374157  |
| 91  | 6 | 0 | -4.294626 | -1.182724 | -6.681025 |
| 92  | 6 | 0 | 4.294626  | 1.182724  | -6.681025 |
| 93  | 6 | 0 | -4.294626 | -1.182724 | 6.681025  |
| 94  | 6 | 0 | 4.294626  | 1.182724  | 6.681025  |
| 95  | 6 | 0 | -3.768195 | -2.292861 | -7.610325 |
| 96  | 1 | 0 | -2.840199 | -2.001344 | -8.115344 |
| 97  | 1 | 0 | -3.592625 | -3.231528 | -7.072525 |
| 98  | 1 | 0 | -4.510166 | -2.498673 | -8.387818 |
| 99  | 6 | 0 | -3.768195 | -2.292861 | 7.610325  |
| 100 | 1 | 0 | -3.592625 | -3.231528 | 7.072525  |
| 101 | 1 | 0 | -2.840199 | -2.001344 | 8.115344  |
| 102 | 1 | 0 | -4.510166 | -2.498673 | 8.387818  |
| 103 | 6 | 0 | 3.768195  | 2.292861  | 7.610325  |
| 104 | 1 | 0 | 3.592625  | 3.231528  | 7.072525  |
| 105 | 1 | 0 | 2.840199  | 2.001344  | 8.115344  |
| 106 | 1 | 0 | 4.510166  | 2.498673  | 8.387818  |
| 107 | 6 | 0 | 3.768195  | 2.292861  | -7.610325 |
| 108 | 1 | 0 | 2.840199  | 2.001344  | -8.115344 |
| 109 | 1 | 0 | 3.592625  | 3.231528  | -7.072525 |
| 110 | 1 | 0 | 4.510166  | 2.498673  | -8.387818 |
| 111 | 6 | 0 | -4.563045 | 0.082189  | 7.534309  |
| 112 | 1 | 0 | -4.989866 | 0.898945  | 6.942444  |
| 113 | 1 | 0 | -5.276470 | -0.153497 | 8.331040  |
| 114 | 1 | 0 | -3.642577 | 0.447555  | 8.003014  |
| 115 | 6 | 0 | -5.621227 | -1.666687 | 6.043965  |
| 116 | 1 | 0 | -6.079771 | -0.901003 | 5.409120  |
| 117 | 1 | 0 | -5.464743 | -2.563866 | 5.434898  |
| 118 | 1 | 0 | -6.340806 | -1.914734 | 6.831396  |
| 119 | 6 | 0 | -4.563045 | 0.082189  | -7.534309 |
| 120 | 1 | 0 | -5.276470 | -0.153497 | -8.331040 |
| 121 | 1 | 0 | -4.989866 | 0.898945  | -6.942444 |
| 122 | 1 | 0 | -3.642577 | 0.447555  | -8.003014 |
| 123 | 6 | 0 | -5.621227 | -1.666687 | -6.043965 |
| 124 | 1 | 0 | -5.464743 | -2.563866 | -5.434898 |
| 125 | 1 | 0 | -6.079771 | -0.901003 | -5.409120 |
| 126 | 1 | 0 | -6.340806 | -1.914734 | -6.831396 |
| 127 | 6 | 0 | 4.563045  | -0.082189 | -7.534309 |
| 128 | 1 | 0 | 5.276470  | 0.153497  | -8.331040 |
| 129 | 1 | 0 | 4.989866  | -0.898945 | -6.942444 |
| 130 | 1 | 0 | 3.642577  | -0.447555 | -8.003014 |
| 131 | 6 | 0 | 5.621227  | 1.666687  | -6.043965 |
| 132 | 1 | 0 | 5.464743  | 2.563866  | -5.434898 |
| 133 | 1 | 0 | 6.079771  | 0.901003  | -5.409120 |
| 134 | 1 | 0 | 6.340806  | 1.914734  | -6.831396 |
| 135 | 6 | 0 | 4.563045  | -0.082189 | 7.534309  |
| 136 | 1 | 0 | 4.989866  | -0.898945 | 6.942444  |
| 137 | 1 | 0 | 5.276470  | 0.153497  | 8.331040  |
| 138 | 1 | 0 | 3.642577  | -0.447555 | 8.003014  |
| 139 | 6 | 0 | 5.621227  | 1.666687  | 6.043965  |
| 140 | 1 | 0 | 6.079771  | 0.901003  | 5.409120  |
| 141 | 1 | 0 | 5.464743  | 2.563866  | 5.434898  |
| 142 | 1 | 0 | 6.340806  | 1.914734  | 6.831396  |

Rotational constants (GHZ): 0.0432669 0.0236479 0.0173148

Standard basis: 6-31G(d) (6D, 7F)

SCF Done: E(UB3LYP) = -2701.93695236 A.U. after 6 cycles

Convg = 0.9611D-08 -V/T = 2.0098

<Sx>= 0.0000 <Sy>= 0.0000 <Sz>= 1.0000 <S\*\*2>= 2.0201 S= 1.0067

<L.S>= 0.000000000000E+00

Annihilation of the first spin contaminant:

S\*\*2 before annihilation 2.0201, after 2.0003

| Item                 | Value    | Threshold | Converged? |
|----------------------|----------|-----------|------------|
| Maximum Force        | 0.000022 | 0.000450  | YES        |
| RMS Force            | 0.000004 | 0.000300  | YES        |
| Maximum Displacement | 0.001062 | 0.001800  | YES        |
| RMS Displacement     | 0.000248 | 0.001200  | YES        |

Predicted change in Energy=-3.874733D-08

Optimization completed.

-- Stationary point found.

# Diradical dication of conjoined [5]helicene, *meso*, $C_{2h}$ broken symmetry singlet state at UB3LYP/6-31G(d) in the gas phase

Stoichiometry C64H74N4(2+)  
 Framework group C2H[SGH(C4H2),X(C60H72N4)]  
 Deg. of freedom 107  
 Full point group C2H NOp 4  
 Largest Abelian subgroup C2H NOp 4  
 Largest concise Abelian subgroup C2H NOp 4  
 Standard orientation:

| Center Number | Atomic Number | Atomic Type | Coordinates (Angstroms) |           |           |
|---------------|---------------|-------------|-------------------------|-----------|-----------|
|               |               |             | X                       | Y         | Z         |
| 1             | 7             | 0           | -0.661050               | 0.198367  | 2.406876  |
| 2             | 7             | 0           | -0.661050               | 0.198367  | -2.406876 |
| 3             | 6             | 0           | -3.305786               | -0.836379 | 5.557625  |
| 4             | 6             | 0           | -3.615833               | 0.163619  | 4.616773  |
| 5             | 1             | 0           | -4.572287               | 0.662728  | 4.701251  |
| 6             | 6             | 0           | -2.758419               | 0.543531  | 3.585891  |
| 7             | 6             | 0           | -3.096505               | 1.670386  | 2.595119  |
| 8             | 6             | 0           | -2.497282               | 1.287470  | 1.239989  |
| 9             | 6             | 0           | -3.077641               | 1.593323  | 0.000000  |
| 10            | 1             | 0           | -4.036237               | 2.092754  | 0.000000  |
| 11            | 6             | 0           | -2.497282               | 1.287470  | -1.239989 |
| 12            | 6             | 0           | -3.096505               | 1.670386  | -2.595119 |
| 13            | 6             | 0           | -2.758419               | 0.543531  | -3.585891 |
| 14            | 6             | 0           | -3.615833               | 0.163619  | -4.616773 |
| 15            | 1             | 0           | -4.572287               | 0.662728  | -4.701251 |
| 16            | 6             | 0           | -3.305786               | -0.836379 | -5.557625 |
| 17            | 6             | 0           | -2.066591               | -1.482219 | -5.418875 |
| 18            | 1             | 0           | -1.782223               | -2.274411 | -6.100393 |
| 19            | 6             | 0           | -1.183266               | -1.142079 | -4.403611 |
| 20            | 1             | 0           | -0.244043               | -1.673254 | -4.314176 |
| 21            | 6             | 0           | -1.520659               | -0.132462 | -3.495907 |
| 22            | 6             | 0           | -1.248369               | 0.653105  | -1.213506 |
| 23            | 6             | 0           | -0.616215               | 0.352615  | 0.000000  |
| 24            | 6             | 0           | -1.248369               | 0.653105  | 1.213506  |
| 25            | 6             | 0           | -1.520659               | -0.132462 | 3.495907  |
| 26            | 6             | 0           | -1.183266               | -1.142079 | 4.403611  |
| 27            | 6             | 0           | -2.066591               | -1.482219 | 5.418875  |
| 28            | 1             | 0           | -1.782223               | -2.274411 | 6.100393  |
| 29            | 6             | 0           | -4.611632               | 1.928717  | 2.501401  |
| 30            | 1             | 0           | -5.162786               | 1.039489  | 2.179470  |
| 31            | 1             | 0           | -4.822622               | 2.744423  | 1.804383  |
| 32            | 1             | 0           | -5.008306               | 2.251486  | 3.466695  |
| 33            | 6             | 0           | -2.410494               | 2.987960  | 3.071890  |
| 34            | 1             | 0           | -1.321532               | 2.890104  | 3.122621  |
| 35            | 1             | 0           | -2.777293               | 3.258764  | 4.066880  |
| 36            | 1             | 0           | -2.642246               | 3.807279  | 2.383318  |
| 37            | 6             | 0           | -4.611632               | 1.928717  | -2.501401 |
| 38            | 1             | 0           | -5.162786               | 1.039489  | -2.179470 |
| 39            | 1             | 0           | -5.008306               | 2.251486  | -3.466695 |
| 40            | 1             | 0           | -4.822622               | 2.744423  | -1.804383 |
| 41            | 6             | 0           | -2.410494               | 2.987960  | -3.071890 |
| 42            | 1             | 0           | -1.321532               | 2.890104  | -3.122621 |
| 43            | 1             | 0           | -2.642246               | 3.807279  | -2.383318 |
| 44            | 1             | 0           | -2.777293               | 3.258764  | -4.066880 |
| 45            | 1             | 0           | -0.244043               | -1.673254 | 4.314176  |
| 46            | 6             | 0           | 0.616215                | -0.352615 | 0.000000  |
| 47            | 6             | 0           | 1.248369                | -0.653105 | -1.213506 |
| 48            | 7             | 0           | 0.661050                | -0.198367 | -2.406876 |
| 49            | 7             | 0           | 0.661050                | -0.198367 | 2.406876  |
| 50            | 6             | 0           | 1.248369                | -0.653105 | 1.213506  |
| 51            | 6             | 0           | 2.497282                | -1.287470 | -1.239989 |
| 52            | 6             | 0           | 2.497282                | -1.287470 | 1.239989  |
| 53            | 6             | 0           | 3.077641                | -1.593323 | 0.000000  |
| 54            | 1             | 0           | 4.036237                | -2.092754 | 0.000000  |
| 55            | 6             | 0           | 3.096505                | -1.670386 | -2.595119 |
| 56            | 6             | 0           | 3.096505                | -1.670386 | 2.595119  |
| 57            | 6             | 0           | 2.758419                | -0.543531 | 3.585891  |
| 58            | 6             | 0           | 2.758419                | -0.543531 | -3.585891 |
| 59            | 6             | 0           | 1.520659                | 0.132462  | -3.495907 |
| 60            | 6             | 0           | 3.615833                | -0.163619 | -4.616773 |
| 61            | 1             | 0           | 4.572287                | -0.662728 | -4.701251 |
| 62            | 6             | 0           | 3.305786                | 0.836379  | -5.557625 |
| 63            | 6             | 0           | 2.066591                | 1.482219  | -5.418875 |
| 64            | 1             | 0           | 1.782223                | 2.274411  | -6.100393 |
| 65            | 6             | 0           | 1.183266                | 1.142079  | -4.403611 |
| 66            | 1             | 0           | 0.244043                | 1.673254  | -4.314176 |
| 67            | 6             | 0           | 1.520659                | 0.132462  | 3.495907  |
| 68            | 6             | 0           | 3.615833                | -0.163619 | 4.616773  |
| 69            | 1             | 0           | 4.572287                | -0.662728 | 4.701251  |
| 70            | 6             | 0           | 3.305786                | 0.836379  | 5.557625  |
| 71            | 6             | 0           | 2.066591                | 1.482219  | 5.418875  |
| 72            | 1             | 0           | 1.782223                | 2.274411  | 6.100393  |
| 73            | 6             | 0           | 1.183266                | 1.142079  | 4.403611  |
| 74            | 1             | 0           | 0.244043                | 1.673254  | 4.314176  |
| 75            | 6             | 0           | 2.410494                | -2.987960 | -3.071890 |
| 76            | 1             | 0           | 1.321532                | -2.890104 | -3.122621 |
| 77            | 1             | 0           | 2.777293                | -3.258764 | -4.066880 |
| 78            | 1             | 0           | 2.642246                | -3.807279 | -2.383318 |

|     |   |   |           |           |           |
|-----|---|---|-----------|-----------|-----------|
| 79  | 6 | 0 | 4.611632  | -1.928717 | -2.501401 |
| 80  | 1 | 0 | 5.162786  | -1.039489 | -2.179470 |
| 81  | 1 | 0 | 4.822622  | -2.744423 | -1.804383 |
| 82  | 1 | 0 | 5.008306  | -2.251486 | -3.466695 |
| 83  | 6 | 0 | 4.611632  | -1.928717 | 2.501401  |
| 84  | 1 | 0 | 4.822622  | -2.744423 | 1.804383  |
| 85  | 1 | 0 | 5.162786  | -1.039489 | 2.179470  |
| 86  | 1 | 0 | 5.008306  | -2.251486 | 3.466695  |
| 87  | 6 | 0 | 2.410494  | -2.987960 | 3.071890  |
| 88  | 1 | 0 | 2.777293  | -3.258764 | 4.066880  |
| 89  | 1 | 0 | 1.321532  | -2.890104 | 3.122621  |
| 90  | 1 | 0 | 2.642246  | -3.807279 | 2.383318  |
| 91  | 6 | 0 | -4.309004 | -1.183380 | -6.667273 |
| 92  | 6 | 0 | 4.309004  | 1.183380  | -6.667273 |
| 93  | 6 | 0 | -4.309004 | -1.183380 | 6.667273  |
| 94  | 6 | 0 | 4.309004  | 1.183380  | 6.667273  |
| 95  | 6 | 0 | -3.787359 | -2.295964 | -7.596365 |
| 96  | 1 | 0 | -2.861035 | -2.006491 | -8.105603 |
| 97  | 1 | 0 | -3.610757 | -3.233759 | -7.057382 |
| 98  | 1 | 0 | -4.532566 | -2.502486 | -8.370562 |
| 99  | 6 | 0 | -3.787359 | -2.295964 | 7.596365  |
| 100 | 1 | 0 | -3.610757 | -3.233759 | 7.057382  |
| 101 | 1 | 0 | -2.861035 | -2.006491 | 8.105603  |
| 102 | 1 | 0 | -4.532566 | -2.502486 | 8.370562  |
| 103 | 6 | 0 | 3.787359  | 2.295964  | 7.596365  |
| 104 | 1 | 0 | 3.610757  | 3.233759  | 7.057382  |
| 105 | 1 | 0 | 2.861035  | 2.006491  | 8.105603  |
| 106 | 1 | 0 | 4.532566  | 2.502486  | 8.370562  |
| 107 | 6 | 0 | 3.787359  | 2.295964  | -7.596365 |
| 108 | 1 | 0 | 2.861035  | 2.006491  | -8.105603 |
| 109 | 1 | 0 | 3.610757  | 3.233759  | -7.057382 |
| 110 | 1 | 0 | 4.532566  | 2.502486  | -8.370562 |
| 111 | 6 | 0 | -4.579099 | 0.080274  | 7.522029  |
| 112 | 1 | 0 | -5.002911 | 0.898597  | 6.930187  |
| 113 | 1 | 0 | -5.295629 | -0.156285 | 8.315705  |
| 114 | 1 | 0 | -3.659934 | 0.443708  | 7.994758  |
| 115 | 6 | 0 | -5.633894 | -1.664429 | 6.024332  |
| 116 | 1 | 0 | -6.089253 | -0.896920 | 5.389431  |
| 117 | 1 | 0 | -5.476292 | -2.560580 | 5.414049  |
| 118 | 1 | 0 | -6.356529 | -1.913187 | 6.808730  |
| 119 | 6 | 0 | -4.579099 | 0.080274  | -7.522029 |
| 120 | 1 | 0 | -5.295629 | -0.156285 | -8.315705 |
| 121 | 1 | 0 | -5.002911 | 0.898597  | -6.930187 |
| 122 | 1 | 0 | -3.659934 | 0.443708  | -7.994758 |
| 123 | 6 | 0 | -5.633894 | -1.664429 | -6.024332 |
| 124 | 1 | 0 | -5.476292 | -2.560580 | -5.414049 |
| 125 | 1 | 0 | -6.089253 | -0.896920 | -5.389431 |
| 126 | 1 | 0 | -6.356529 | -1.913187 | -6.808730 |
| 127 | 6 | 0 | 4.579099  | -0.080274 | -7.522029 |
| 128 | 1 | 0 | 5.295629  | 0.156285  | -8.315705 |
| 129 | 1 | 0 | 5.002911  | -0.898597 | -6.930187 |
| 130 | 1 | 0 | 3.659934  | -0.443708 | -7.994758 |
| 131 | 6 | 0 | 5.633894  | 1.664429  | -6.024332 |
| 132 | 1 | 0 | 5.476292  | 2.560580  | -5.414049 |
| 133 | 1 | 0 | 6.089253  | 0.896920  | -5.389431 |
| 134 | 1 | 0 | 6.356529  | 1.913187  | -6.808730 |
| 135 | 6 | 0 | 4.579099  | -0.080274 | 7.522029  |
| 136 | 1 | 0 | 5.002911  | -0.898597 | 6.930187  |
| 137 | 1 | 0 | 5.295629  | 0.156285  | 8.315705  |
| 138 | 1 | 0 | 3.659934  | -0.443708 | 7.994758  |
| 139 | 6 | 0 | 5.633894  | 1.664429  | 6.024332  |
| 140 | 1 | 0 | 6.089253  | 0.896920  | 5.389431  |
| 141 | 1 | 0 | 5.476292  | 2.560580  | 5.414049  |
| 142 | 1 | 0 | 6.356529  | 1.913187  | 6.808730  |

Rotational constants (GHZ): 0.0431306 0.0236994 0.0173345

Standard basis: 6-31G(d) (6D, 7F)

SCF Done: E(UB3LYP) = -2701.93612640 A.U. after 7 cycles

Convg = 0.6445D-08 -V/T = 2.0098

<Sx>= 0.0000 <Sy>= 0.0000 <Sz>= 0.0000 <S\*\*2>= 0.9899 S= 0.6135

<L.S>= 0.000000000000E+00

Annihilation of the first spin contaminant:

| Item                     | Value    | Threshold    | Converged? |
|--------------------------|----------|--------------|------------|
| S**2 before annihilation | 0.9899   | after 0.1296 |            |
| Maximum Force            | 0.000039 | 0.000450     | YES        |
| RMS Force                | 0.000005 | 0.000300     | YES        |
| Maximum Displacement     | 0.001655 | 0.001800     | YES        |
| RMS Displacement         | 0.000426 | 0.001200     | YES        |

Predicted change in Energy=-1.407464D-07

Optimization completed.

-- Stationary point found.



# Diradical dication of conjoined [5]helicene, triplet state, $C_1$ -symmetric transition state from chiral $D_2$ structure to meso $C_{2h}$ structure at UBLYP/6-31G(d) in the gas phase

Stoichiometry C64H74N4(2+,3)  
 Framework group C1[X(C64H74N4)]  
 Deg. of freedom 420  
 Full point group C1 NOp 1  
 Largest Abelian subgroup C1 NOp 1  
 Largest concise Abelian subgroup C1 NOp 1  
 Standard orientation:

| Center Number | Atomic Number | Atomic Type | Coordinates (Angstroms) |           |           |
|---------------|---------------|-------------|-------------------------|-----------|-----------|
|               |               |             | X                       | Y         | Z         |
| 1             | 7             | 0           | 2.419230                | -0.678557 | 0.316039  |
| 2             | 7             | 0           | -2.434562               | -0.725755 | 0.300407  |
| 3             | 6             | 0           | 1.209830                | -2.774091 | -0.020015 |
| 4             | 6             | 0           | -0.000510               | -3.462490 | 0.177382  |
| 5             | 1             | 0           | 0.003194                | -4.539034 | 0.072696  |
| 6             | 6             | 0           | -1.218121               | -2.831519 | 0.460126  |
| 7             | 6             | 0           | -2.527957               | -3.543825 | 0.783582  |
| 8             | 6             | 0           | -3.631541               | -2.831716 | -0.012555 |
| 9             | 6             | 0           | -4.717467               | -3.515186 | -0.557171 |
| 10            | 1             | 0           | -4.771908               | -4.586695 | -0.414595 |
| 11            | 6             | 0           | -5.743721               | -2.889664 | -1.287377 |
| 12            | 6             | 0           | -5.628914               | -1.505442 | -1.482343 |
| 13            | 1             | 0           | -6.373495               | -0.968955 | -2.057514 |
| 14            | 6             | 0           | -4.562613               | -0.784211 | -0.959849 |
| 15            | 1             | 0           | -4.510945               | 0.279802  | -1.145609 |
| 16            | 6             | 0           | -3.573061               | -1.434358 | -0.215459 |
| 17            | 6             | 0           | -1.221335               | -1.423963 | 0.421377  |
| 18            | 6             | 0           | -0.014308               | -0.719937 | 0.362835  |
| 19            | 6             | 0           | 1.206682                | -1.399841 | 0.250245  |
| 20            | 6             | 0           | -2.456230               | -5.051153 | 0.485674  |
| 21            | 1             | 0           | -2.296023               | -5.257099 | -0.577624 |
| 22            | 1             | 0           | -3.376393               | -5.550857 | 0.797215  |
| 23            | 1             | 0           | -1.648889               | -5.514993 | 1.060096  |
| 24            | 6             | 0           | -2.806524               | -3.366366 | 2.309202  |
| 25            | 1             | 0           | -2.852265               | -2.311818 | 2.598880  |
| 26            | 1             | 0           | -2.019407               | -3.847317 | 2.899176  |
| 27            | 1             | 0           | -3.763600               | -3.831764 | 2.564132  |
| 28            | 6             | 0           | -0.025772               | 0.653028  | -0.003268 |
| 29            | 6             | 0           | -1.243269               | 1.310440  | -0.171186 |
| 30            | 7             | 0           | -2.403881               | 0.656844  | 0.270897  |
| 31            | 7             | 0           | 2.398389                | 0.677562  | -0.072808 |
| 32            | 6             | 0           | 1.160455                | 1.238708  | -0.443147 |
| 33            | 6             | 0           | -1.308215               | 2.588010  | -0.738402 |
| 34            | 6             | 0           | 1.104008                | 2.372359  | -1.270783 |
| 35            | 6             | 0           | -0.123672               | 3.048297  | -1.342974 |
| 36            | 1             | 0           | -0.164939               | 3.964861  | -1.917209 |
| 37            | 6             | 0           | -2.653285               | 3.315469  | -0.803207 |
| 38            | 6             | 0           | -3.569099               | 2.780644  | 0.318381  |
| 39            | 6             | 0           | -3.458400               | 1.451252  | 0.789098  |
| 40            | 6             | 0           | -4.581843               | 3.558592  | 0.878174  |
| 41            | 1             | 0           | -4.695284               | 4.579289  | 0.536321  |
| 42            | 6             | 0           | -5.470845               | 3.091269  | 1.865103  |
| 43            | 6             | 0           | -5.305064               | 1.767333  | 2.304528  |
| 44            | 6             | 0           | -4.312392               | 0.952892  | 1.778270  |
| 45            | 1             | 0           | -4.189569               | -0.059515 | 2.146074  |
| 46            | 1             | 0           | -5.946185               | 1.361933  | 3.077449  |
| 47            | 6             | 0           | -3.311647               | 3.010543  | -2.183175 |
| 48            | 1             | 0           | -3.437879               | 1.935436  | -2.346494 |
| 49            | 1             | 0           | -4.296117               | 3.485061  | -2.240262 |
| 50            | 1             | 0           | -2.692781               | 3.403919  | -2.996573 |
| 51            | 6             | 0           | -2.446275               | 4.841835  | -0.682080 |
| 52            | 1             | 0           | -2.032887               | 5.118007  | 0.292563  |
| 53            | 1             | 0           | -1.771955               | 5.207326  | -1.460804 |
| 54            | 1             | 0           | -3.388442               | 5.376128  | -0.824275 |
| 55            | 6             | 0           | -6.557194               | 4.024508  | 2.420391  |
| 56            | 6             | 0           | -6.911720               | -3.719807 | -1.840191 |
| 57            | 6             | 0           | -7.429670               | 3.333157  | 3.485342  |
| 58            | 1             | 0           | -7.957339               | 2.460992  | 3.082718  |
| 59            | 1             | 0           | -6.843772               | 3.015407  | 4.355290  |
| 60            | 1             | 0           | -8.188807               | 4.034591  | 3.844570  |
| 61            | 6             | 0           | -5.884649               | 5.261185  | 3.067225  |
| 62            | 1             | 0           | -5.229644               | 4.968657  | 3.895291  |
| 63            | 1             | 0           | -5.288048               | 5.832534  | 2.348065  |
| 64            | 1             | 0           | -6.652022               | 5.933509  | 3.465341  |
| 65            | 6             | 0           | -7.475577               | 4.483840  | 1.260273  |
| 66            | 1             | 0           | -6.925846               | 5.031816  | 0.487555  |
| 67            | 1             | 0           | -7.970900               | 3.630284  | 0.784232  |
| 68            | 1             | 0           | -8.252646               | 5.152028  | 1.646218  |
| 69            | 6             | 0           | -6.360392               | -4.793062 | -2.811558 |
| 70            | 1             | 0           | -5.665761               | -5.480915 | -2.317665 |
| 71            | 1             | 0           | -7.186690               | -5.390953 | -3.210502 |
| 72            | 1             | 0           | -5.838311               | -4.332072 | -3.657400 |
| 73            | 6             | 0           | -7.931467               | -2.852362 | -2.602259 |
| 74            | 1             | 0           | -8.379429               | -2.084827 | -1.960815 |
| 75            | 1             | 0           | -7.484382               | -2.360842 | -3.473915 |
| 76            | 1             | 0           | -8.745601               | -3.484939 | -2.968960 |
| 77            | 6             | 0           | -7.642980               | -4.414611 | -0.664640 |
| 78            | 1             | 0           | -6.984363               | -5.089886 | -0.108056 |

|     |   |   |           |           |           |
|-----|---|---|-----------|-----------|-----------|
| 79  | 1 | 0 | -8.049272 | -3.680248 | 0.039677  |
| 80  | 1 | 0 | -8.477264 | -5.011566 | -1.048038 |
| 81  | 6 | 0 | 2.342353  | 2.668423  | -2.120023 |
| 82  | 6 | 0 | 2.462562  | -3.361504 | -0.674398 |
| 83  | 6 | 0 | 3.511210  | 1.602928  | -0.106836 |
| 84  | 6 | 0 | 3.586730  | -1.478440 | 0.639808  |
| 85  | 6 | 0 | 4.403218  | 1.783173  | 0.954153  |
| 86  | 6 | 0 | 4.501135  | -1.138286 | 1.641523  |
| 87  | 6 | 0 | 3.539942  | 2.541141  | -1.171592 |
| 88  | 6 | 0 | 3.657389  | -2.783129 | 0.088406  |
| 89  | 6 | 0 | 4.787299  | -3.549684 | 0.364248  |
| 90  | 6 | 0 | 4.624366  | 3.411740  | -1.243851 |
| 91  | 6 | 0 | 5.607364  | -1.937350 | 1.910734  |
| 92  | 6 | 0 | 5.462115  | 2.680137  | 0.861165  |
| 93  | 6 | 0 | 5.641837  | 3.475507  | -0.274390 |
| 94  | 6 | 0 | 5.817114  | -3.139869 | 1.229710  |
| 95  | 1 | 0 | 4.860275  | -4.530363 | -0.087672 |
| 96  | 1 | 0 | 6.291138  | -1.614668 | 2.686435  |
| 97  | 1 | 0 | 4.323498  | -0.296944 | 2.284561  |
| 98  | 1 | 0 | 4.234056  | 1.298936  | 1.897362  |
| 99  | 1 | 0 | 6.131214  | 2.767214  | 1.708585  |
| 100 | 1 | 0 | 4.668409  | 4.102197  | -2.076140 |
| 101 | 6 | 0 | 2.426338  | 1.589676  | -3.242991 |
| 102 | 1 | 0 | 2.497648  | 0.576159  | -2.836691 |
| 103 | 1 | 0 | 1.546238  | 1.639926  | -3.892454 |
| 104 | 1 | 0 | 3.316533  | 1.769332  | -3.853730 |
| 105 | 6 | 0 | 2.260297  | 4.049161  | -2.793954 |
| 106 | 1 | 0 | 1.371993  | 4.107374  | -3.430107 |
| 107 | 1 | 0 | 2.225713  | 4.864880  | -2.064993 |
| 108 | 1 | 0 | 3.116066  | 4.211837  | -3.453319 |
| 109 | 6 | 0 | 7.047939  | -4.030462 | 1.447585  |
| 110 | 6 | 0 | 6.823704  | 4.438140  | -0.452733 |
| 111 | 6 | 0 | 7.816293  | 4.358488  | 0.722438  |
| 112 | 1 | 0 | 7.358150  | 4.661858  | 1.670717  |
| 113 | 1 | 0 | 8.230117  | 3.350684  | 0.841956  |
| 114 | 1 | 0 | 8.655338  | 5.036180  | 0.537537  |
| 115 | 6 | 0 | 7.574690  | 4.068915  | -1.756146 |
| 116 | 1 | 0 | 6.931378  | 4.146208  | -2.639272 |
| 117 | 1 | 0 | 8.419484  | 4.750204  | -1.902829 |
| 118 | 1 | 0 | 7.968545  | 3.047467  | -1.712007 |
| 119 | 6 | 0 | 6.298268  | 5.891632  | -0.553184 |
| 120 | 1 | 0 | 5.631346  | 6.034047  | -1.410256 |
| 121 | 1 | 0 | 5.754603  | 6.180759  | 0.353046  |
| 122 | 1 | 0 | 7.140148  | 6.581204  | -0.675664 |
| 123 | 6 | 0 | 7.761954  | -4.235448 | 0.088487  |
| 124 | 1 | 0 | 8.641125  | -4.874182 | 0.224241  |
| 125 | 1 | 0 | 7.113449  | -4.719425 | -0.649732 |
| 126 | 1 | 0 | 8.099651  | -3.281192 | -0.330822 |
| 127 | 6 | 0 | 6.601690  | -5.403089 | 2.009157  |
| 128 | 1 | 0 | 5.932590  | -5.934515 | 1.323964  |
| 129 | 1 | 0 | 7.478380  | -6.039417 | 2.169713  |
| 130 | 1 | 0 | 6.086212  | -5.290626 | 2.969382  |
| 131 | 6 | 0 | 8.048717  | -3.401450 | 2.435272  |
| 132 | 1 | 0 | 8.407795  | -2.425460 | 2.089251  |
| 133 | 1 | 0 | 7.619330  | -3.279964 | 3.436271  |
| 134 | 1 | 0 | 8.921518  | -4.053925 | 2.535021  |
| 135 | 6 | 0 | 2.444025  | -4.900652 | -0.672942 |
| 136 | 1 | 0 | 3.306327  | -5.300337 | -1.211534 |
| 137 | 1 | 0 | 2.447700  | -5.313910 | 0.340570  |
| 138 | 1 | 0 | 1.560053  | -5.270201 | -1.200912 |
| 139 | 6 | 0 | 2.491310  | -2.883195 | -2.158761 |
| 140 | 1 | 0 | 1.612309  | -3.249360 | -2.699288 |
| 141 | 1 | 0 | 2.515520  | -1.792035 | -2.238788 |
| 142 | 1 | 0 | 3.387152  | -3.275465 | -2.650121 |

Rotational constants (GHZ): 0.0439113 0.0229142 0.0171732

Standard basis: 6-31G(d) (6D, 7F)

SCF Done: E(UB3LYP) = -2701.87955672 A.U. after 1 cycles

Convg = 0.4359D-08 -V/T = 2.0098

<Sx>= 0.0000 <Sy>= 0.0000 <Sz>= 1.0000 <S\*\*2>= 2.0214 S= 1.0071

<L.S>= 0.000000000000E+00

Annihilation of the first spin contaminant:

S\*\*2 before annihilation 2.0214, after 2.0003

| Item                 | Value    | Threshold | Converged? |
|----------------------|----------|-----------|------------|
| Maximum Force        | 0.000006 | 0.000450  | YES        |
| RMS Force            | 0.000000 | 0.000300  | YES        |
| Maximum Displacement | 0.000567 | 0.001800  | YES        |
| RMS Displacement     | 0.000082 | 0.001200  | YES        |

Predicted change in Energy=-6.308443D-10

Optimization completed.

-- Stationary point found.

# Diradical dication of conjoined [5]helicene, broken-symmetry singlet state, $C_1$ -symmetric transition state from chiral $D_2$ structure to meso $C_{2h}$ structure at UB3LYP/6-31G(d) in the gas phase

Stoichiometry C64H74N4(2+)  
 Framework group C1[X(C64H74N4)]  
 Deg. of freedom 420  
 Full point group C1 NOp 1  
 Largest Abelian subgroup C1 NOp 1  
 Largest concise Abelian subgroup C1 NOp 1

Standard orientation:

| Center Number | Atomic Number | Atomic Type | Coordinates (Angstroms) |           |           |
|---------------|---------------|-------------|-------------------------|-----------|-----------|
|               |               |             | X                       | Y         | Z         |
| 1             | 7             | 0           | 2.386476                | -0.698884 | 0.244304  |
| 2             | 7             | 0           | -2.454650               | -0.717408 | 0.275045  |
| 3             | 6             | 0           | 1.175247                | -2.790651 | -0.072361 |
| 4             | 6             | 0           | -0.041484               | -3.457367 | 0.166168  |
| 5             | 1             | 0           | -0.050817               | -4.536559 | 0.078657  |
| 6             | 6             | 0           | -1.250113               | -2.818583 | 0.485054  |
| 7             | 6             | 0           | -2.558664               | -3.512277 | 0.855483  |
| 8             | 6             | 0           | -3.650349               | -2.828432 | 0.016136  |
| 9             | 6             | 0           | -4.722975               | -3.528853 | -0.533706 |
| 10            | 1             | 0           | -4.771535               | -4.598326 | -0.373979 |
| 11            | 6             | 0           | -5.750993               | -2.919362 | -1.274216 |
| 12            | 6             | 0           | -5.652243               | -1.533219 | -1.475974 |
| 13            | 1             | 0           | -6.402874               | -1.009368 | -2.054889 |
| 14            | 6             | 0           | -4.594889               | -0.796749 | -0.958941 |
| 15            | 1             | 0           | -4.551366               | 0.266198  | -1.152517 |
| 16            | 6             | 0           | -3.596625               | -1.433451 | -0.213222 |
| 17            | 6             | 0           | -1.259510               | -1.417483 | 0.409015  |
| 18            | 6             | 0           | -0.041882               | -0.716708 | 0.253346  |
| 19            | 6             | 0           | 1.183684                | -1.416151 | 0.150230  |
| 20            | 6             | 0           | -2.493876               | -5.030861 | 0.624911  |
| 21            | 1             | 0           | -2.337324               | -5.285869 | -0.428446 |
| 22            | 1             | 0           | -3.415642               | -5.512361 | 0.960395  |
| 23            | 1             | 0           | -1.685548               | -5.471035 | 1.216874  |
| 24            | 6             | 0           | -2.842907               | -3.263106 | 2.365623  |
| 25            | 1             | 0           | -2.872325               | -2.196226 | 2.609501  |
| 26            | 1             | 0           | -2.066276               | -3.729487 | 2.981151  |
| 27            | 1             | 0           | -3.808849               | -3.699419 | 2.639081  |
| 28            | 6             | 0           | -0.047783               | 0.618622  | -0.143207 |
| 29            | 6             | 0           | -1.271442               | 1.303520  | -0.290352 |
| 30            | 7             | 0           | -2.416295               | 0.669621  | 0.194168  |
| 31            | 7             | 0           | 2.373593                | 0.658912  | -0.139871 |
| 32            | 6             | 0           | 1.160185                | 1.213787  | -0.551560 |
| 33            | 6             | 0           | -1.309366               | 2.589784  | -0.815863 |
| 34            | 6             | 0           | 1.118303                | 2.369976  | -1.344611 |
| 35            | 6             | 0           | -0.104811               | 3.049543  | -1.396910 |
| 36            | 1             | 0           | -0.142601               | 3.971436  | -1.964420 |
| 37            | 6             | 0           | -2.657476               | 3.314591  | -0.897951 |
| 38            | 6             | 0           | -3.528088               | 2.822816  | 0.281269  |
| 39            | 6             | 0           | -3.437278               | 1.489481  | 0.745503  |
| 40            | 6             | 0           | -4.476114               | 3.637772  | 0.898461  |
| 41            | 1             | 0           | -4.566153               | 4.663915  | 0.566110  |
| 42            | 6             | 0           | -5.335705               | 3.197393  | 1.922950  |
| 43            | 6             | 0           | -5.203909               | 1.863447  | 2.341412  |
| 44            | 6             | 0           | -4.266613               | 1.015614  | 1.766359  |
| 45            | 1             | 0           | -4.165780               | -0.002462 | 2.125066  |
| 46            | 1             | 0           | -5.826284               | 1.474753  | 3.137994  |
| 47            | 6             | 0           | -3.349876               | 2.932463  | -2.237371 |
| 48            | 1             | 0           | -3.460698               | 1.848820  | -2.347059 |
| 49            | 1             | 0           | -4.345217               | 3.385261  | -2.290898 |
| 50            | 1             | 0           | -2.762059               | 3.295664  | -3.087666 |
| 51            | 6             | 0           | -2.462842               | 4.843751  | -0.863534 |
| 52            | 1             | 0           | -2.015120               | 5.176841  | 0.077925  |
| 53            | 1             | 0           | -1.823642               | 5.173318  | -1.687387 |
| 54            | 1             | 0           | -3.415223               | 5.362285  | -0.998391 |
| 55            | 6             | 0           | -6.360721               | 4.165912  | 2.531741  |
| 56            | 6             | 0           | -6.910827               | -3.763753 | -1.821361 |
| 57            | 6             | 0           | -7.205693               | 3.501335  | 3.635208  |
| 58            | 1             | 0           | -7.784574               | 2.651836  | 3.255201  |
| 59            | 1             | 0           | -6.590131               | 3.156411  | 4.473812  |
| 60            | 1             | 0           | -7.919701               | 4.228246  | 4.034270  |
| 61            | 6             | 0           | -5.615198               | 5.375394  | 3.149071  |
| 62            | 1             | 0           | -4.933273               | 5.056337  | 3.945042  |
| 63            | 1             | 0           | -5.032364               | 5.927524  | 2.404066  |
| 64            | 1             | 0           | -6.338371               | 6.073566  | 3.583902  |
| 65            | 6             | 0           | -7.316616               | 4.662637  | 1.418179  |
| 66            | 1             | 0           | -6.784707               | 5.194151  | 0.621857  |
| 67            | 1             | 0           | -7.863043               | 3.828838  | 0.963554  |
| 68            | 1             | 0           | -8.050935               | 5.355728  | 1.842223  |
| 69            | 6             | 0           | -6.347190               | -4.846451 | -2.775310 |
| 70            | 1             | 0           | -5.649898               | -5.522305 | -2.268853 |
| 71            | 1             | 0           | -7.167614               | -5.455608 | -3.169349 |
| 72            | 1             | 0           | -5.824784               | -4.393396 | -3.625214 |
| 73            | 6             | 0           | -7.932853               | -2.913838 | -2.600008 |
| 74            | 1             | 0           | -8.392133               | -2.143334 | -1.970312 |
| 75            | 1             | 0           | -7.484048               | -2.428030 | -3.473985 |
| 76            | 1             | 0           | -8.738835               | -3.557709 | -2.965053 |

|     |   |   |           |           |           |
|-----|---|---|-----------|-----------|-----------|
| 77  | 6 | 0 | -7.643602 | -4.448177 | -0.640234 |
| 78  | 1 | 0 | -6.983495 | -5.112397 | -0.072328 |
| 79  | 1 | 0 | -8.057400 | -3.707337 | 0.052776  |
| 80  | 1 | 0 | -8.472557 | -5.054616 | -1.020328 |
| 81  | 6 | 0 | 2.363526  | 2.661636  | -2.186658 |
| 82  | 6 | 0 | 2.429982  | -3.397984 | -0.707839 |
| 83  | 6 | 0 | 3.490820  | 1.577886  | -0.158374 |
| 84  | 6 | 0 | 3.538389  | -1.500851 | 0.605595  |
| 85  | 6 | 0 | 4.366681  | 1.750964  | 0.920338  |
| 86  | 6 | 0 | 4.437113  | -1.154181 | 1.622858  |
| 87  | 6 | 0 | 3.540560  | 2.528577  | -1.214539 |
| 88  | 6 | 0 | 3.608501  | -2.820587 | 0.081225  |
| 89  | 6 | 0 | 4.723525  | -3.591974 | 0.397641  |
| 90  | 6 | 0 | 4.629128  | 3.395084  | -1.260025 |
| 91  | 6 | 0 | 5.527112  | -1.958439 | 1.930998  |
| 92  | 6 | 0 | 5.427624  | 2.645342  | 0.853764  |
| 93  | 6 | 0 | 5.630830  | 3.448589  | -0.273584 |
| 94  | 6 | 0 | 5.739820  | -3.176615 | 1.276597  |
| 95  | 1 | 0 | 4.796546  | -4.579812 | -0.038559 |
| 96  | 1 | 0 | 6.193863  | -1.631323 | 2.719543  |
| 97  | 1 | 0 | 4.248661  | -0.307726 | 2.255234  |
| 98  | 1 | 0 | 4.171593  | 1.272589  | 1.861050  |
| 99  | 1 | 0 | 6.077837  | 2.728882  | 1.716123  |
| 100 | 1 | 0 | 4.690214  | 4.088049  | -2.089220 |
| 101 | 6 | 0 | 2.468281  | 1.591466  | -3.312030 |
| 102 | 1 | 0 | 2.526123  | 0.573950  | -2.912165 |
| 103 | 1 | 0 | 1.601346  | 1.649101  | -3.978560 |
| 104 | 1 | 0 | 3.371246  | 1.767156  | -3.905349 |
| 105 | 6 | 0 | 2.292935  | 4.047697  | -2.849699 |
| 106 | 1 | 0 | 1.410612  | 4.112263  | -3.493785 |
| 107 | 1 | 0 | 2.250698  | 4.857285  | -2.114125 |
| 108 | 1 | 0 | 3.155381  | 4.215457  | -3.499386 |
| 109 | 6 | 0 | 6.957821  | -4.072031 | 1.534674  |
| 110 | 6 | 0 | 6.819555  | 4.405538  | -0.424994 |
| 111 | 6 | 0 | 7.790382  | 4.315529  | 0.767430  |
| 112 | 1 | 0 | 7.316782  | 4.616818  | 1.708767  |
| 113 | 1 | 0 | 8.197494  | 3.305292  | 0.889418  |
| 114 | 1 | 0 | 8.635659  | 4.990126  | 0.600818  |
| 115 | 6 | 0 | 7.591881  | 4.038458  | -1.717095 |
| 116 | 1 | 0 | 6.964970  | 4.123507  | -2.611122 |
| 117 | 1 | 0 | 8.442231  | 4.716645  | -1.844411 |
| 118 | 1 | 0 | 7.980192  | 3.015023  | -1.670885 |
| 119 | 6 | 0 | 6.302249  | 5.862049  | -0.528831 |
| 120 | 1 | 0 | 5.651786  | 6.011344  | -1.397188 |
| 121 | 1 | 0 | 5.743981  | 6.150160  | 0.368743  |
| 122 | 1 | 0 | 7.149929  | 6.547425  | -0.633185 |
| 123 | 6 | 0 | 7.699518  | -4.300886 | 0.193688  |
| 124 | 1 | 0 | 8.570677  | -4.943684 | 0.358438  |
| 125 | 1 | 0 | 7.063734  | -4.790907 | -0.551442 |
| 126 | 1 | 0 | 8.053425  | -3.355097 | -0.231268 |
| 127 | 6 | 0 | 6.488332  | -5.433987 | 2.104125  |
| 128 | 1 | 0 | 5.830911  | -5.969925 | 1.411329  |
| 129 | 1 | 0 | 7.356979  | -6.073741 | 2.292134  |
| 130 | 1 | 0 | 5.952956  | -5.305187 | 3.051268  |
| 131 | 6 | 0 | 7.941478  | -3.436837 | 2.535438  |
| 132 | 1 | 0 | 8.316569  | -2.468961 | 2.183693  |
| 133 | 1 | 0 | 7.491028  | -3.297729 | 3.524834  |
| 134 | 1 | 0 | 8.806282  | -4.094828 | 2.663847  |
| 135 | 6 | 0 | 2.394848  | -4.936044 | -0.685725 |
| 136 | 1 | 0 | 3.259484  | -5.354686 | -1.206363 |
| 137 | 1 | 0 | 2.377526  | -5.335747 | 0.333232  |
| 138 | 1 | 0 | 1.513098  | -5.301145 | -1.220996 |
| 139 | 6 | 0 | 2.500519  | -2.937642 | -2.193536 |
| 140 | 1 | 0 | 1.631683  | -3.303396 | -2.750775 |
| 141 | 1 | 0 | 2.533443  | -1.847338 | -2.286644 |
| 142 | 1 | 0 | 3.404499  | -3.339558 | -2.662141 |

Rotational constants (GHZ): 0.0431081 0.0231609 0.0172967

Standard basis: 6-31G(d) (6D, 7F)

SCF Done: E(UB3LYP) = -2701.86866592 A.U. after 11 cycles

Convg = 0.7181D-08 -V/T = 2.0099

<Sx>= 0.0000 <Sy>= 0.0000 <Sz>= 0.0000 <S\*\*2>= 0.0000 S= 0.0000

<L.S>= 0.000000000000E+00

Annihilation of the first spin contaminant:

S\*\*2 before annihilation 0.0000, after 0.0000

| Item                 | Value    | Threshold | Converged? |
|----------------------|----------|-----------|------------|
| Maximum Force        | 0.000031 | 0.000450  | YES        |
| RMS Force            | 0.000003 | 0.000300  | YES        |
| Maximum Displacement | 0.001261 | 0.001800  | YES        |
| RMS Displacement     | 0.000237 | 0.001200  | YES        |

Predicted change in Energy=-2.024484D-08

Optimization completed.

-- Stationary point found.

# Simplified structure diradical dication $1b^{2+2+}$ , chiral, $D_2$ triplet state at UB3LYP/6-31G(d) in the gas phase

Stoichiometry C40H26N4(2+,3)  
 Framework group D2[C2(HCC.CCH).X(C36H24N4)]  
 Deg. of freedom 51  
 Full point group D2 NOP 4  
 Largest Abelian subgroup D2 NOP 4  
 Largest concise Abelian subgroup D2 NOP 4  
 Standard orientation:

| Center Number | Atomic Number | Atomic Type | Coordinates (Angstroms) |           |           |
|---------------|---------------|-------------|-------------------------|-----------|-----------|
|               |               |             | X                       | Y         | Z         |
| 1             | 7             | 0           | 2.406331                | -0.168805 | -0.668771 |
| 2             | 7             | 0           | -2.406331               | 0.168805  | -0.668771 |
| 3             | 6             | 0           | 5.574798                | -2.260946 | -2.485747 |
| 4             | 6             | 0           | 4.636946                | -1.576269 | -3.258522 |
| 5             | 1             | 0           | 4.711791                | -1.594577 | -4.342090 |
| 6             | 6             | 0           | 3.594105                | -0.864344 | -2.664072 |
| 7             | 6             | 0           | 2.568475                | -0.121595 | -3.496138 |
| 8             | 6             | 0           | 1.230142                | -0.077304 | -2.804036 |
| 9             | 6             | 0           | 0.000000                | 0.000000  | -3.471855 |
| 10            | 1             | 0           | 0.000000                | 0.000000  | -4.558696 |
| 11            | 6             | 0           | -1.230142               | 0.077304  | -2.804036 |
| 12            | 6             | 0           | -2.568475               | 0.121595  | -3.496138 |
| 13            | 6             | 0           | -3.594105               | 0.864344  | -2.664072 |
| 14            | 6             | 0           | -4.636946               | 1.576269  | -3.258522 |
| 15            | 1             | 0           | -4.711791               | 1.594577  | -4.342090 |
| 16            | 6             | 0           | -5.574798               | 2.260946  | -2.485747 |
| 17            | 6             | 0           | -5.465283               | 2.261044  | -1.090888 |
| 18            | 1             | 0           | -6.176523               | 2.814215  | -0.486249 |
| 19            | 6             | 0           | -4.434383               | 1.567224  | -0.469270 |
| 20            | 1             | 0           | -4.339615               | 1.588641  | 0.609417  |
| 21            | 6             | 0           | -3.513282               | 0.862319  | -1.256499 |
| 22            | 6             | 0           | -1.210156               | 0.066544  | -1.403373 |
| 23            | 6             | 0           | 0.000000                | 0.000000  | -0.709066 |
| 24            | 6             | 0           | 1.210156                | -0.066544 | -1.403373 |
| 25            | 6             | 0           | 3.513282                | -0.862319 | -1.256499 |
| 26            | 6             | 0           | 4.434383                | -1.567224 | -0.469270 |
| 27            | 6             | 0           | 5.465283                | -2.261044 | -1.090888 |
| 28            | 1             | 0           | 6.176523                | -2.814215 | -0.486249 |
| 29            | 1             | 0           | 4.339615                | -1.588641 | 0.609417  |
| 30            | 6             | 0           | 0.000000                | 0.000000  | 0.709066  |
| 31            | 6             | 0           | -1.210156               | -0.066544 | 1.403373  |
| 32            | 7             | 0           | -2.406331               | -0.168805 | 0.668771  |
| 33            | 7             | 0           | 2.406331                | 0.168805  | 0.668771  |
| 34            | 6             | 0           | 1.210156                | 0.066544  | 1.403373  |
| 35            | 6             | 0           | -1.230142               | -0.077304 | 2.804036  |
| 36            | 6             | 0           | 1.230142                | 0.077304  | 2.804036  |
| 37            | 6             | 0           | 0.000000                | 0.000000  | 3.471855  |
| 38            | 1             | 0           | 0.000000                | 0.000000  | 4.558696  |
| 39            | 6             | 0           | 2.568475                | 0.121595  | 3.496138  |
| 40            | 6             | 0           | -2.568475               | -0.121595 | 3.496138  |
| 41            | 6             | 0           | 3.594105                | 0.864344  | 2.664072  |
| 42            | 6             | 0           | -3.594105               | -0.864344 | 2.664072  |
| 43            | 6             | 0           | -3.513282               | -0.862319 | 1.256499  |
| 44            | 6             | 0           | 3.513282                | 0.862319  | 1.256499  |
| 45            | 6             | 0           | -4.636946               | -1.576269 | 3.258522  |
| 46            | 1             | 0           | -4.711791               | -1.594577 | 4.342090  |
| 47            | 6             | 0           | 4.636946                | 1.576269  | 3.258522  |
| 48            | 1             | 0           | 4.711791                | 1.594577  | 4.342090  |
| 49            | 6             | 0           | 5.574798                | 2.260946  | 2.485747  |
| 50            | 6             | 0           | 5.465283                | 2.261044  | 1.090888  |
| 51            | 1             | 0           | 6.176523                | 2.814215  | 0.486249  |
| 52            | 6             | 0           | 4.434383                | 1.567224  | 0.469270  |
| 53            | 1             | 0           | 4.339615                | 1.588641  | -0.609417 |
| 54            | 6             | 0           | -5.574798               | -2.260946 | 2.485747  |
| 55            | 6             | 0           | -5.465283               | -2.261044 | 1.090888  |
| 56            | 6             | 0           | -4.434383               | -1.567224 | 0.469270  |
| 57            | 1             | 0           | -4.339615               | -1.588641 | -0.609417 |
| 58            | 1             | 0           | -6.176523               | -2.814215 | 0.486249  |
| 59            | 1             | 0           | -6.379955               | 2.804787  | -2.969018 |
| 60            | 1             | 0           | 6.379955                | -2.804787 | -2.969018 |
| 61            | 1             | 0           | 6.379955                | 2.804787  | 2.969018  |
| 62            | 1             | 0           | -6.379955               | -2.804787 | 2.969018  |
| 63            | 1             | 0           | -2.909793               | -0.911355 | -3.675657 |
| 64            | 1             | 0           | -2.477641               | 0.582262  | -4.484683 |
| 65            | 1             | 0           | -2.909793               | 0.911355  | 3.675657  |
| 66            | 1             | 0           | -2.477641               | -0.582262 | -4.484683 |
| 67            | 1             | 0           | 2.477641                | -0.582262 | -4.484683 |
| 68            | 1             | 0           | 2.909793                | 0.911355  | -3.675657 |
| 69            | 1             | 0           | 2.477641                | 0.582262  | 4.484683  |
| 70            | 1             | 0           | 2.909793                | -0.911355 | 3.675657  |

Rotational constants (GHZ): 0.1309975 0.0606618 0.0485619

Standard basis: 6-31G(d) (6D, 7F)

SCF Done: E(UB3LYP) = -1758.40018832 A.U. after 5 cycles

NFock= 5 Conv=0.80D-08 -V/T= 2.0097

<Sx>= 0.0000 <Sy>= 0.0000 <Sz>= 1.0000 <S\*\*2>= 2.0219 S= 1.0073

<L.S>= 0.000000000000

Annihilation of the first spin contaminant:

S\*\*2 before annihilation 2.0219 after 2.0003

| Item                 | Value    | Threshold | Converged? |
|----------------------|----------|-----------|------------|
| Maximum Force        | 0.000006 | 0.000015  | YES        |
| RMS Force            | 0.000001 | 0.000010  | YES        |
| Maximum Displacement | 0.000051 | 0.000060  | YES        |
| RMS Displacement     | 0.000010 | 0.000040  | YES        |

Predicted change in Energy=-8.632029D-10

Optimization completed.

-- Stationary point found.

# Simplified structure diradical dication $1b^{2+2+}$ , *meso*, $C_{2h}$ triplet state at UB3LYP/6-31G(d) in the gas phase

Stoichiometry C40H26N4(2+,3)  
 Framework group C2H[SGH(C4H2),X(C36H24N4)]  
 Deg. of freedom 53  
 Full point group C2H NOp 4  
 Largest Abelian subgroup C2H NOp 4  
 Largest concise Abelian subgroup C2H NOp 4  
 Standard orientation:

| Center Number | Atomic Number | Atomic Type | Coordinates (Angstroms) |           |           |
|---------------|---------------|-------------|-------------------------|-----------|-----------|
|               |               |             | X                       | Y         | Z         |
| 1             | 7             | 0           | -0.682762               | 0.096690  | 2.410269  |
| 2             | 7             | 0           | -0.682762               | 0.096690  | -2.410269 |
| 3             | 6             | 0           | -3.123677               | -1.236976 | 5.573279  |
| 4             | 6             | 0           | -3.605312               | -0.319453 | 4.639747  |
| 5             | 1             | 0           | -4.625446               | 0.045917  | 4.716168  |
| 6             | 6             | 0           | -2.798160               | 0.139954  | 3.598141  |
| 7             | 6             | 0           | -3.313613               | 1.125162  | 2.569906  |
| 8             | 6             | 0           | -2.659753               | 0.896749  | 1.231636  |
| 9             | 6             | 0           | -3.289001               | 1.120932  | 0.000000  |
| 10            | 1             | 0           | -4.316849               | 1.473828  | 0.000000  |
| 11            | 6             | 0           | -2.659753               | 0.896749  | -1.231636 |
| 12            | 6             | 0           | -3.313613               | 1.125162  | -2.569906 |
| 13            | 6             | 0           | -2.798160               | 0.139954  | -3.598141 |
| 14            | 6             | 0           | -3.605312               | -0.319453 | -4.639747 |
| 15            | 1             | 0           | -4.625446               | 0.045917  | -4.716168 |
| 16            | 6             | 0           | -3.123677               | -1.236976 | -5.573279 |
| 17            | 6             | 0           | -1.819659               | -1.730962 | -5.458688 |
| 18            | 1             | 0           | -1.449038               | -2.466220 | -6.165433 |
| 19            | 6             | 0           | -0.993949               | -1.297404 | -4.428733 |
| 20            | 1             | 0           | 0.006632                | -1.699978 | -4.331302 |
| 21            | 6             | 0           | -1.480948               | -0.353992 | -3.513268 |
| 22            | 6             | 0           | -1.331054               | 0.451298  | -1.212222 |
| 23            | 6             | 0           | -0.662718               | 0.253784  | 0.000000  |
| 24            | 6             | 0           | -1.331054               | 0.451298  | 1.212222  |
| 25            | 6             | 0           | -1.480948               | -0.353992 | 3.513268  |
| 26            | 6             | 0           | -0.993949               | -1.297404 | 4.428733  |
| 27            | 6             | 0           | -1.819659               | -1.730962 | 5.458688  |
| 28            | 1             | 0           | -1.449038               | -2.466220 | 6.165433  |
| 29            | 1             | 0           | 0.006632                | 1.699978  | 4.331302  |
| 30            | 6             | 0           | 0.662718                | -0.253784 | 0.000000  |
| 31            | 6             | 0           | 1.331054                | -0.451298 | -1.212222 |
| 32            | 7             | 0           | 0.682762                | -0.096690 | -2.410269 |
| 33            | 7             | 0           | 0.682762                | -0.096690 | 2.410269  |
| 34            | 6             | 0           | 1.331054                | -0.451298 | 1.212222  |
| 35            | 6             | 0           | 2.659753                | -0.896749 | -1.231636 |
| 36            | 6             | 0           | 2.659753                | -0.896749 | 1.231636  |
| 37            | 6             | 0           | 3.289001                | -1.120932 | 0.000000  |
| 38            | 1             | 0           | 4.316849                | -1.473828 | 0.000000  |
| 39            | 6             | 0           | 3.313613                | -1.125162 | -2.569906 |
| 40            | 6             | 0           | 3.313613                | -1.125162 | 2.569906  |
| 41            | 6             | 0           | 2.798160                | -0.139954 | 3.598141  |
| 42            | 6             | 0           | 2.798160                | -0.139954 | -3.598141 |
| 43            | 6             | 0           | 1.480948                | 0.353992  | -3.513268 |
| 44            | 6             | 0           | 3.605312                | 0.319453  | -4.639747 |
| 45            | 1             | 0           | 4.625446                | -0.045917 | -4.716168 |
| 46            | 6             | 0           | 3.123677                | 1.236976  | -5.573279 |
| 47            | 6             | 0           | 1.819659                | 1.730962  | -5.458688 |
| 48            | 1             | 0           | 1.449038                | 2.466220  | -6.165433 |
| 49            | 6             | 0           | 0.993949                | 1.297404  | -4.428733 |
| 50            | 1             | 0           | -0.006632               | 1.699978  | -4.331302 |
| 51            | 6             | 0           | 1.480948                | 0.353992  | 3.513268  |
| 52            | 6             | 0           | 3.605312                | 0.319453  | 4.639747  |
| 53            | 1             | 0           | 4.625446                | -0.045917 | 4.716168  |
| 54            | 6             | 0           | 3.123677                | 1.236976  | 5.573279  |
| 55            | 6             | 0           | 1.819659                | 1.730962  | 5.458688  |
| 56            | 1             | 0           | 1.449038                | 2.466220  | 6.165433  |
| 57            | 6             | 0           | 0.993949                | 1.297404  | 4.428733  |
| 58            | 1             | 0           | -0.006632               | 1.699978  | 4.331302  |
| 59            | 1             | 0           | 3.766845                | 1.577974  | 6.378035  |
| 60            | 1             | 0           | -3.766845               | -1.577974 | 6.378035  |
| 61            | 1             | 0           | 3.766845                | 1.577974  | -6.378035 |
| 62            | 1             | 0           | -3.766845               | -1.577974 | -6.378035 |
| 63            | 1             | 0           | -4.402227               | 1.053347  | -2.487317 |
| 64            | 1             | 0           | -4.402227               | 1.053347  | 2.487317  |
| 65            | 1             | 0           | -3.102110               | 2.156349  | -2.898145 |
| 66            | 1             | 0           | 3.102110                | -2.156349 | -2.898145 |
| 67            | 1             | 0           | 4.402227                | -1.053347 | -2.487317 |
| 68            | 1             | 0           | 3.102110                | -2.156349 | 2.898145  |
| 69            | 1             | 0           | 4.402227                | -1.053347 | 2.487317  |
| 70            | 1             | 0           | -3.102110               | 2.156349  | 2.898145  |

Rotational constants (GHZ): 0.1309565 0.0634746 0.0469196

Standard basis: 6-31G(d) (6D, 7F)

SCF Done: E(UB3LYP) = -1758.39891208 A.U. after 5 cycles  
 NFOck= 5 Conv=0.10D-07 -V/T= 2.0097

<Sx>= 0.0000 <Sy>= 0.0000 <Sz>= 1.0000 <S\*\*2>= 2.0215 S= 1.0072

<L.S>= 0.000000000000

Annihilation of the first spin contaminant:

S\*\*2 before annihilation 2.0215, after 2.0003

-- Stationary point found

| Item                 | Value    | Threshold | Converged? |
|----------------------|----------|-----------|------------|
| Maximum Force        | 0.000007 | 0.000015  | YES        |
| RMS Force            | 0.000001 | 0.000010  | YES        |
| Maximum Displacement | 0.000021 | 0.000060  | YES        |
| RMS Displacement     | 0.000006 | 0.000040  | YES        |

Predicted change in Energy=-1.448165D-09

Optimization completed.

-- Stationary point found.

# Simplified structure of diradical dication $1b^{2+2+}$ , triplet state, $C_1$ -symmetric transition state from chiral $D_2$ structure to meso $C_{2h}$ structure at UB3LYP/6-31G(d) in the gas phase.

Stoichiometry C40H26N4(2+3)  
 Framework group C1[X(C40H26N4)]  
 Deg. of freedom 204  
 Full point group C1 NOp 1  
 Largest Abelian subgroup C1 NOp 1  
 Largest concise Abelian subgroup C1 NOp 1  
 Standard orientation:

| Center Number | Atomic Number | Atomic Type | Coordinates (Angstroms) |           |           |
|---------------|---------------|-------------|-------------------------|-----------|-----------|
|               |               |             | X                       | Y         | Z         |
| 1             | 7             | 0           | -2.437072               | 0.690443  | 0.190766  |
| 2             | 7             | 0           | 2.432895                | 0.732960  | 0.196812  |
| 3             | 6             | 0           | -1.208433               | 2.756267  | -0.267459 |
| 4             | 6             | 0           | -0.002581               | 3.462221  | -0.141176 |
| 5             | 1             | 0           | -0.003189               | 4.530498  | -0.340646 |
| 6             | 6             | 0           | 1.209050                | 2.842879  | 0.177495  |
| 7             | 6             | 0           | 2.510120                | 3.570565  | 0.370247  |
| 8             | 6             | 0           | 3.645673                | 2.797777  | -0.263403 |
| 9             | 6             | 0           | 4.745517                | 3.456807  | -0.815194 |
| 10            | 1             | 0           | 4.792667                | 4.540292  | -0.753031 |
| 11            | 6             | 0           | 5.767022                | 2.751412  | -1.448177 |
| 12            | 6             | 0           | 5.677889                | 1.361219  | -1.565676 |
| 13            | 1             | 0           | 6.450372                | 0.804828  | -2.086433 |
| 14            | 6             | 0           | 4.593363                | 0.678120  | -1.028370 |
| 15            | 1             | 0           | 4.533400                | -0.395099 | -1.146272 |
| 16            | 6             | 0           | 3.590054                | 1.392793  | -0.357476 |
| 17            | 6             | 0           | 1.215757                | 1.438434  | 0.261310  |
| 18            | 6             | 0           | 0.004360                | 0.733216  | 0.263688  |
| 19            | 6             | 0           | -1.216602               | 1.404197  | 0.097178  |
| 20            | 6             | 0           | 0.014330                | -0.660166 | -0.007009 |
| 21            | 6             | 0           | 1.232766                | -1.321566 | -0.138976 |
| 22            | 7             | 0           | 2.397107                | -0.645660 | 0.267014  |
| 23            | 7             | 0           | -2.415034               | -0.687170 | -0.110519 |
| 24            | 6             | 0           | -1.168360               | -1.273377 | -0.422931 |
| 25            | 6             | 0           | 1.304668                | -2.618262 | -0.658141 |
| 26            | 6             | 0           | -1.095018               | -2.452941 | -1.180979 |
| 27            | 6             | 0           | 0.130866                | -3.131830 | -1.231152 |
| 28            | 1             | 0           | 0.177929                | -4.079644 | -1.761074 |
| 29            | 6             | 0           | 2.648691                | -3.304510 | -0.666617 |
| 30            | 6             | 0           | 3.564994                | -2.754240 | 0.412441  |
| 31            | 6             | 0           | 3.454432                | -1.413351 | 0.637854  |
| 32            | 6             | 0           | 4.553712                | -3.541574 | 1.003997  |
| 33            | 1             | 0           | 4.656863                | -4.578843 | 0.697989  |
| 34            | 6             | 0           | 5.408301                | -3.016351 | 1.974789  |
| 35            | 6             | 0           | 5.274220                | -1.684938 | 2.384537  |
| 36            | 6             | 0           | 4.294031                | -0.876122 | 1.622174  |
| 37            | 1             | 0           | 4.168610                | 0.148929  | 2.152155  |
| 38            | 1             | 0           | 5.924075                | -1.281501 | 3.154203  |
| 39            | 6             | 0           | -2.323221               | -2.814629 | -1.974984 |
| 40            | 6             | 0           | -2.451077               | 3.301127  | -0.919978 |
| 41            | 6             | 0           | -3.540556               | -1.609704 | -0.105185 |
| 42            | 6             | 0           | -3.619357               | 1.510327  | 0.437200  |
| 43            | 6             | 0           | -4.462938               | -1.719421 | 0.943724  |
| 44            | 6             | 0           | -4.567184               | 1.236362  | 1.432713  |
| 45            | 6             | 0           | -3.546836               | -2.599563 | -1.116347 |
| 46            | 6             | 0           | -3.669987               | 2.765268  | -0.211823 |
| 47            | 6             | 0           | -4.792303               | 3.574822  | -0.035869 |
| 48            | 6             | 0           | -4.619688               | -3.487926 | -1.184185 |
| 49            | 6             | 0           | -5.675754               | 2.060622  | 1.603383  |
| 50            | 6             | 0           | -5.520717               | -2.620640 | 0.865573  |
| 51            | 6             | 0           | -5.638200               | -3.470153 | -0.232603 |
| 52            | 6             | 0           | -5.823938               | 3.206870  | 0.825472  |
| 53            | 1             | 0           | -4.833009               | 4.528238  | -0.554984 |
| 54            | 1             | 0           | -6.402322               | 1.817020  | 2.371643  |
| 55            | 1             | 0           | -4.414880               | 0.441215  | 2.137568  |
| 56            | 1             | 0           | -4.318312               | -1.181287 | 1.861265  |
| 57            | 1             | 0           | -6.229615               | -2.676631 | 1.685221  |
| 58            | 1             | 0           | -4.630259               | -4.231998 | -1.975579 |
| 59            | 1             | 0           | 6.171218                | -3.647313 | 2.419185  |
| 60            | 1             | 0           | -6.466772               | -4.166995 | -0.306406 |
| 61            | 1             | 0           | -6.691004               | 3.848345  | 0.945141  |
| 62            | 1             | 0           | 6.616615                | 3.282607  | -1.864774 |
| 63            | 1             | 0           | 2.689210                | 3.692279  | 1.451273  |
| 64            | 1             | 0           | 2.459142                | 4.581212  | -0.044989 |
| 65            | 1             | 0           | -2.461485               | 4.394669  | -0.909969 |
| 66            | 1             | 0           | -2.431499               | 3.002616  | -1.980630 |
| 67            | 1             | 0           | -2.286607               | -3.850059 | -2.324223 |
| 68            | 1             | 0           | -2.341641               | -2.182295 | -2.877374 |
| 69            | 1             | 0           | 3.115761                | -3.169812 | -1.656073 |
| 70            | 1             | 0           | 2.527065                | -4.385541 | -0.541883 |

Rotational constants (GHz): 0.1298603 0.0621358 0.0463891  
 Standard basis: 6-31G(d) (6D, 7F)  
 SCF Done: E(UB3LYP) = -1758.33941396 A.U. after 4 cycles  
 NFOck= 4 Conv=0.34D-08 -V/T= 2.0097  
 <Sx>= 0.0000 <Sy>= 0.0000 <Sz>= 1.0000 <S\*\*2>= 2.0226 S= 1.0075  
 <L.S>= 0.0000000000  
 Annihilation of the first spin contaminant:  
 S\*\*2 before annihilation = 2.0226, after 2.0004  
 SCF Done: E(UB3LYP) = -1758.33941396 A.U. after 4 cycles  
 NFOck= 4 Conv=0.34D-08 -V/T= 2.0097  
 <Sx>= 0.0000 <Sy>= 0.0000 <Sz>= 1.0000 <S\*\*2>= 2.0226 S= 1.0075  
 <L.S>= 0.0000000000  
 Annihilation of the first spin contaminant:  
 S\*\*2 before annihilation = 2.0226, after 2.0004

#### **4. Supporting References**

- S1. Shiraishi, K.; Rajca, A.; Pink, M.; Rajca, S.  $\pi$ -Conjugated Conjoined Double Helicene via a Sequence of Three Oxidative CC- and NN-Homocouplings. *J. Am. Chem. Soc.* **2005**, *127*, 9312-9313.
- S2. Wang, Y.; Zhang, H.; Pink, M.; Olankitwanit, A.; Rajca, S.; Rajca, A. Radical Cation and Neutral Radical of Aza-thia[7]helicene with SOMO-HOMO Energy Level Inversion. *J. Am. Chem. Soc.* **2016**, *138*, 7298-7304.
- S3. Olankitwanit, A.; Rajca, S.; Rajca, A. Aza-*m*-Xylylene Diradical with Increased Steric Protection of the Aminyl Radicals. *J. Org. Chem.* **2015**, *80*, 5035-5044.
- S4. Miyasaka, M.; Pink, M.; Olankitwanit, A.; Rajca, S.; Rajca, A. Band Gap of Carbon-Sulfur [*n*]Helicenes. *Org. Lett.* **2012**, *14*, 3076-3079.
- S5. Gennett, T.; Milner, D. F.; Weaver, M. J. Role of solvent reorganization dynamics in electron-transfer processes. Theory-experiment comparisons for electrochemical and homogeneous electron exchange involving metallocene redox couples. *J. Phys. Chem.* **1985**, *89*, 2787-2794.
- S6. Connelly, N. G.; Geiger, W. E. Chemical Redox Agents for Organometallic Chemistry. *Chem. Rev.* **1996**, *96*, 877-910.
- S7. Olankitwanit, A.; Pink, M.; Rajca, S.; Rajca, A. Synthesis of Aza-*m*-Xylylene Diradicals with Large Singlet-Triplet Energy Gap and Statistical Analyses of their EPR Spectra. *J. Am. Chem. Soc.* **2014**, *136*, 14277-14288.
- S8. Gallagher, N. M.; Bauer, J. J.; Pink, M.; Rajca, S.; Rajca, A. High Spin Organic Diradical with Robust Stability. *J. Am. Chem. Soc.* **2016**, *138*, 9377-9380.
- S9. Stoll, S.; Schweiger, A. EasySpin, a comprehensive software package for spectral simulation and analysis in EPR *J. Magn. Reson.* **2006**, *178*, 42-55.
- S10. Zak, J. K.; Miyasaka, M.; Rajca, S.; Lapkowski, M.; Rajca, A. Radical Cation of Helical, Cross-Conjugated  $\beta$ -Oligothiophene. *J. Am. Chem. Soc.* **2010**, *132*, 3246-3247.
- S11. (a) Frisch, M. J.; Trucks, G. W.; Schlegel, H. B.; Scuseria, G. E.; Robb, M. A.; Cheeseman, J. R.; Scalmani, G.; Barone, V.; Mennucci, B.; Petersson, G. A.; Nakatsuji, H.; Caricato, M.; Li, X.; Hratchian, H. P.; Izmaylov, A. F.; Bloino, J.; Zheng, G.; Sonnenberg, J. L.; Hada, M.; Ehara, M.; Toyota, K.; Fukuda,



R.; Hasegawa, J.; Ishida, M.; Nakajima, T.; Honda, Y.; Kitao, O.; Nakai, H.; Vreven, T.; Montgomery, Jr., J. A.; Peralta, J. E.; Ogliaro, F.; Bearpark, M.; Heyd, J. J.; Brothers, E.; Kudin, K. N.; Staroverov, V. N.; Kobayashi, R.; Normand, J.; Raghavachari, K.; Rendell, A.; Burant, J. C.; Iyengar, S. S.; Tomasi, J.; Cossi, M.; Rega, N.; Millam, N. J.; Klene, M.; Knox, J. E.; Cross, J. B.; Bakken, V.; Adamo, C.; Jaramillo, J.; Gomperts, R.; Stratmann, R. E.; Yazyev, O.; Austin, A. J.; Cammi, R.; Pomelli, C.; Ochterski, J. W.; Martin, R. L.; Morokuma, K.; Zakrzewski, V. G.; Voth, G. A.; Salvador, P.; Dannenberg, J. J.; Dapprich, S.; Daniels, A. D.; Farkas, Ö.; Foresman, J. B.; Ortiz, J. V.; Cioslowski, J.; Fox, D. J. *Gaussian 09*, Revision A.02 (Gaussian, Inc., Wallingford CT, 2009). (b) M. J. Frisch, G. W. Trucks, H. B. Schlegel, G. E. Scuseria, M. A. Robb, J. R. Cheeseman, G. Scalmani, V. Barone, G. A. Petersson, H. Nakatsuji, X. Li, M. Caricato, A. V. Marenich, J. Bloino, B. G. Janesko, R. Gomperts, B. Mennucci, H. P. Hratchian, J. V. Ortiz, A. F. Izmaylov, J. L. Sonnenberg, D. Williams-Young, F. Ding, F. Lipparini, F. Egidi, J. Goings, B. Peng, A. Petrone, T. Henderson, D. Ranasinghe, V. G. Zakrzewski, J. Gao, N. Rega, G. Zheng, W. Liang, M. Hada, M. Ehara, K. Toyota, R. Fukuda, J. Hasegawa, M. Ishida, T. Nakajima, Y. Honda, O. Kitao, H. Nakai, T. Vreven, K. Throssell, J. A. Montgomery, Jr., J. E. Peralta, F. Ogliaro, M. J. Bearpark, J. J. Heyd, E. N. Brothers, K. N. Kudin, V. N. Staroverov, T. A. Keith, R. Kobayashi, J. Normand, K. Raghavachari, A. P. Rendell, J. C. Burant, S. S. Iyengar, J. Tomasi, M. Cossi, J. M. Millam, M. Klene, C. Adamo, R. Cammi, J. W. Ochterski, R. L. Martin, K. Morokuma, O. Farkas, J. B. Foresman, and D. J. Fox, *Gaussian 16*, Revision A.03 (Gaussian, Inc., Wallingford CT, 2016).

S12. Allouche, A.-R. Gabedit—A graphical user interface for computational chemistry softwares. *J. Comput. Chem.* **2011**, *32*, 174–182.

S13. Yamaguchi, K.; Jensen, F.; Dorigo, A.; Houk, K. N. A Spin Correction Procedure for Unrestricted Hartree–Fock and Møller–Plesset Wavefunctions for Singlet Diradicals and Polyradicals. *Chem. Phys. Lett.* **1988**, *149*, 537–542.

S14. Noodleman, L.; Case, D. A. Density-Functional Theory of Spin Polarization and Spin Coupling in Iron—Sulfur Clusters. *Adv. Inorg. Chem.* **1992**, *38*, 423–470.

S15. Trinquier, G.; Suaud, N.; Malrieu, J.-P. Theoretical Design of High-Spin Polycyclic Hydrocarbons. *Chem.–Eur. J.* **2010**, *16*, 8762–8772.

S16. Quast, H.; Nüdling, W.; Klemm, G.; Kirschfeld, A.; Neuhaus, P.; Sander, W.; Hrovat, D. A.; Borden, W. T. A Perimidine-Derived Non-Kekulé Triplet Diradical *J. Org. Chem.* **2008**, *73*, 4956–4961.

S17. Winter, A. H.; Falvey, D. E.; Cramer, C. J.; Gherman, B. F. Benzylic Cations with Triplet Ground States: Computational Studies of Aryl Carbenium Ions, Silylenium Ions, Nitrenium Ions, and Oxenium Ions Substituted with Meta  $\pi$  Donors. *J. Am. Chem. Soc.* **2007**, *129*, 10113–10119.
